# Supplementary material for: Progesterone receptor antagonists reverse stem cell expansion and the paracrine effectors of progesterone action in the mouse mammary gland
Source: Springer Nature journal article supplement (doi:10.1186/s13058-021-01455-2), 2021-08-03

# Supplemental Figure 1

a

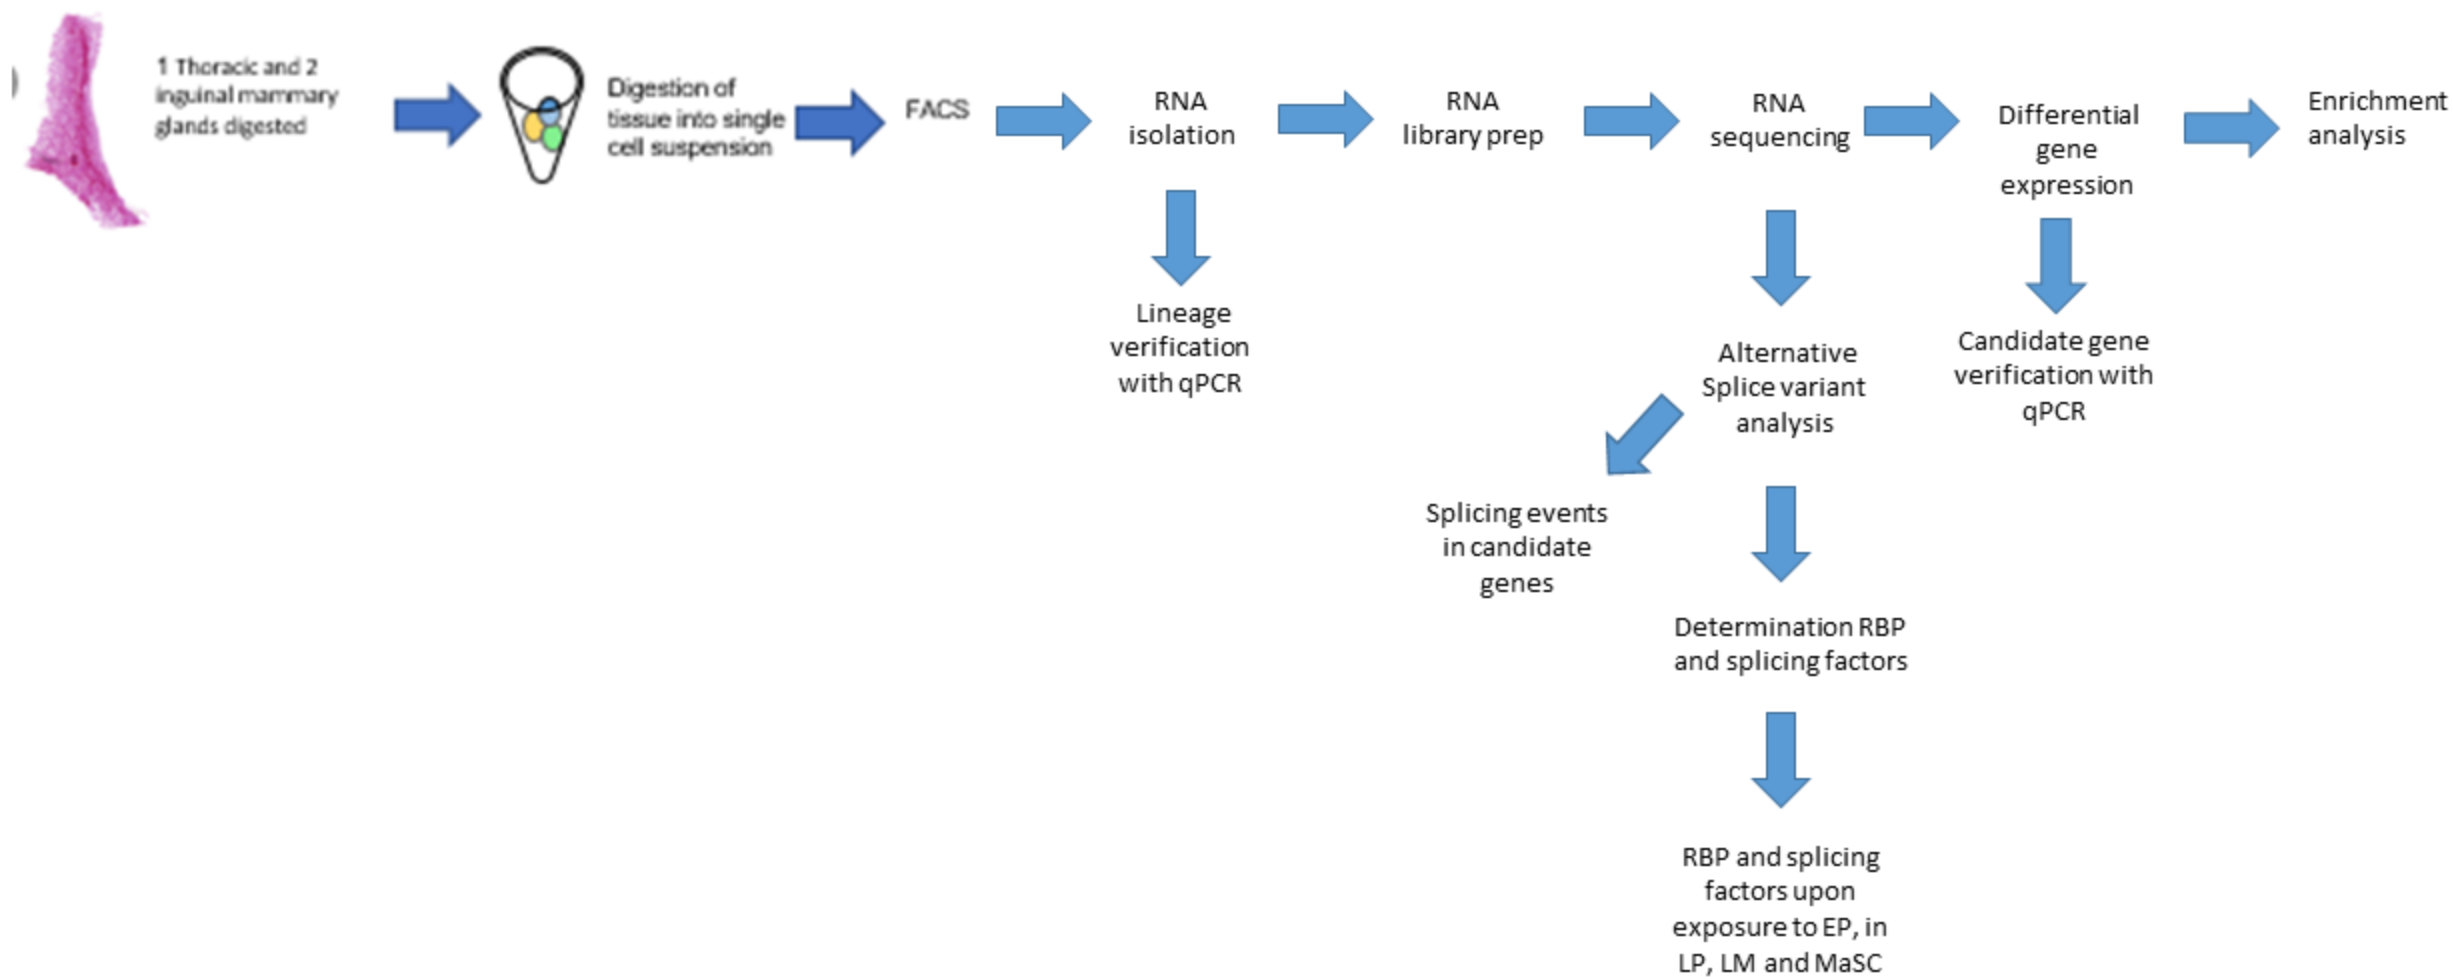

## Mammary Stem Cells

1b.

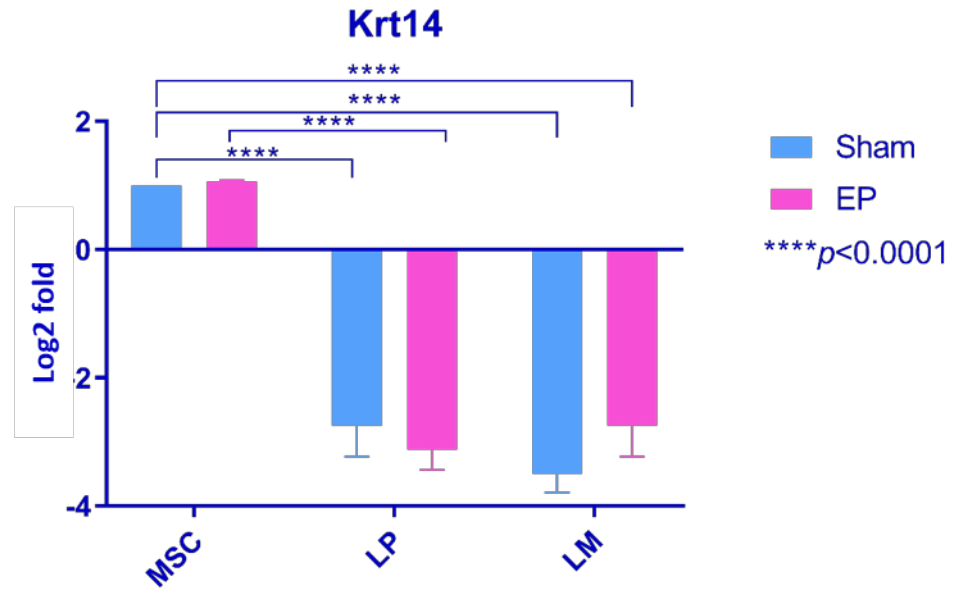

1c.

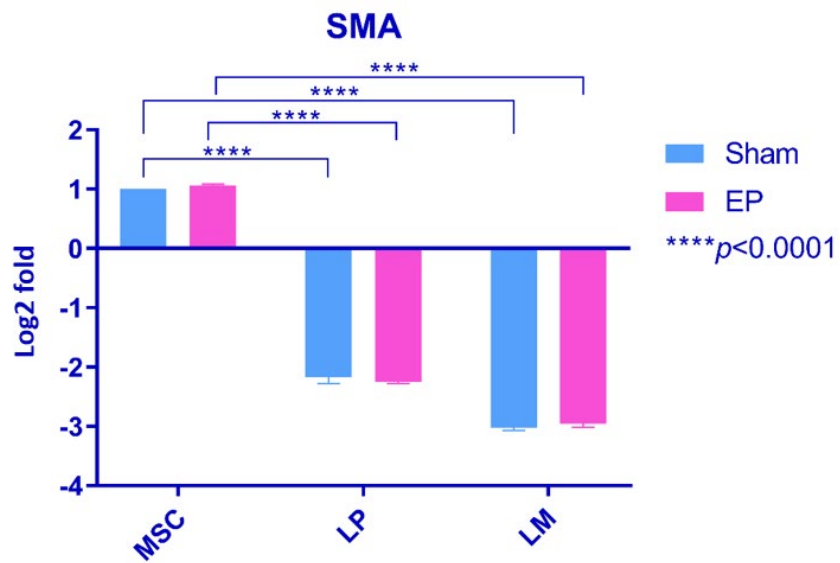

## Luminal Cells

1d.

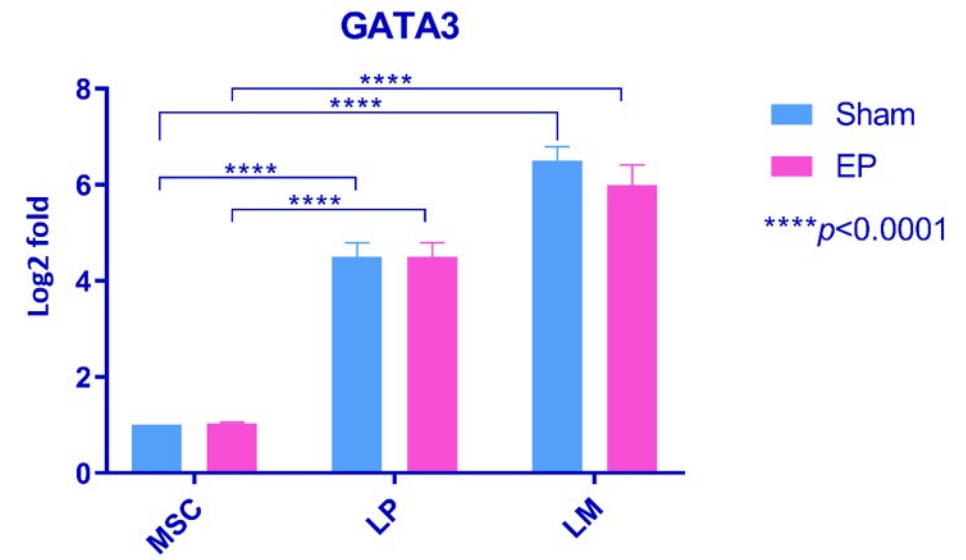

1e.

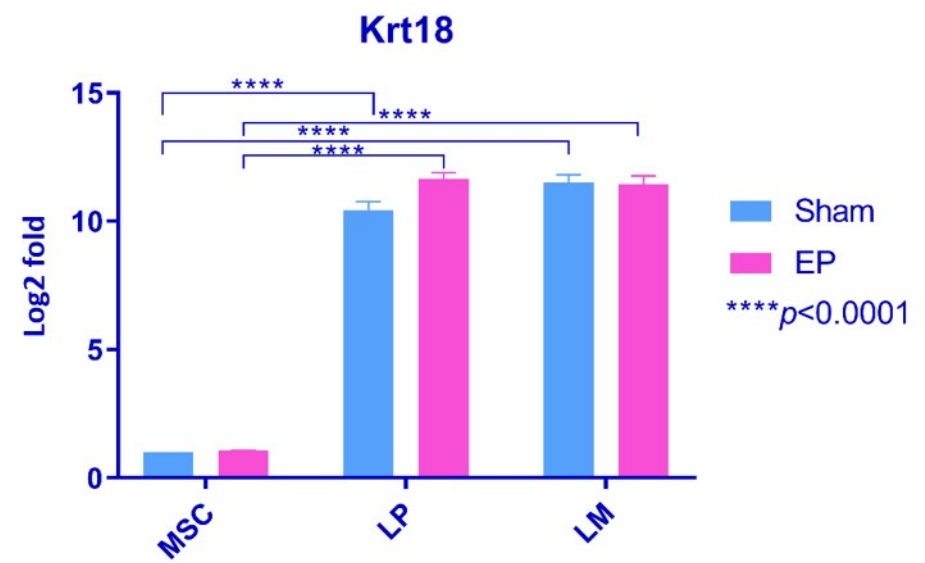

Supplement: MOESM1 [file 19538156]
