# Supplementary material for: Progesterone receptor antagonists reverse stem cell expansion and the paracrine effectors of progesterone action in the mouse mammary gland
Source: Springer Nature journal article supplement (doi:10.1186/s13058-021-01455-2), 2021-08-03
Supplement: MOESM2 [file 19538156]

# Cell Sorting Plan

Mouse mammary gland cells  
labelled with Ter-119, CD31,  
CD45, CD49, CD24 & CD61

Remove cells simultaneously  
positive for TER-119, CD31, CD45

100% Parent population  
Luminal Cells  
(CD24<sup>+</sup>CD49<sup>fl<sub>o</sub></sup>)

100% Parent population  
MSC enriched Basal cells  
(CD24<sup>+</sup>CD49<sup>f<sub>hi</sub></sup>)

Luminal Mature Cells  
(CD24<sup>+</sup>CD61<sup>-</sup>CD49<sup>fl<sub>o</sub></sup>)

Luminal Progenitor Cells  
(CD24<sup>+</sup>CD61<sup>+</sup>CD49<sup>fl<sub>o</sub></sup>)

Remaining  
basal cells

P4 driven Mammary  
Stem cells  
CD24<sup>+</sup>CD61<sup>+</sup>CD49<sup>f<sub>hi</sub></sup>
