# Supplementary material for: Progesterone receptor antagonists reverse stem cell expansion and the paracrine effectors of progesterone action in the mouse mammary gland
Source: Breast Cancer Res. 2021 Aug 3;23:78. doi: 10.1186/s13058-021-01455-2 (PMC8330021; doi:10.1186/s13058-021-01455-2)
Supplement: Supplementary file 10 — Additional file 10. Supplementary Table 4: List of differentially expressed genes, LM [file 13058_2021_1455_MOESM10_ESM.xlsx]

## Sheet: LP HEATMAP
	LP_SHAMvsEP	LP_EPvsEP+TPA	LP_EPvsEP+MFP	Genes_Cluster
Samples_Cluster	1	2	3	0
RAMP1	-2.69385	1.03027	0.869438	1
1810010H24RIK	-3.13645	2.05927	2.02391	1
PER2	-2.0899	1.03757	1.2195	1
CCK	-3.14018	0.442828	0.254678	1
AMIGO2	-1.73597	0.275275	0.0571783	1
LRRC36	-3.46697	2.72768	2.61339	1
STEAP4	-1.8461	1.70483	1.8972	1
AMTN	-3.97031	1.49892	2.08306	1
FAM110A	-1.53222	-0.095861	-0.179149	1
ANXA8	-3.12409	2.66361	2.76618	1
NABP1	-2.24864	0.453584	0.321446	1
FGFR1	-2.30368	1.19932	1.23809	1
LTF	-3.01049	1.97824	2.00302	1
OSGIN1	-2.09686	0.732951	0.495498	1
CHST8	2.1344	1.02895	1.10376	1
UPK3A	-3.82327	0.0867911	0.0833347	1
HEXB	-2.25964	0.668454	0.515442	1
JUND	-1.55065	0.79367	0.597788	1
FGG	-2.16602	-0.108754	-0.0776558	1
FAM25C	-2.27389	0.158927	0.10473	1
CDKN1A	-1.26911	-0.134425	-0.45283	1
KLF10	-1.38463	0.558294	0.328772	1
HSPA2	-1.1289	0.578466	0.654243	1
IFRD1	-1.94855	0.770702	0.691629	1
OSMR	-1.86802	1.23385	1.12903	1
CEACAM10	-2.61786	0.690796	0.854561	1
SCNN1B	-2.28745	1.5767	1.61228	1
EPHB6	-1.69566	0.51232	0.560732	1
BHLHE40	-1.37992	0.142235	0.10328	1
ELF3	-2.06638	0.80435	0.934342	1
MAFF	-2.11015	0.337515	-0.00372672	1
LRRC26	-2.64271	1.61573	1.58882	1
BTN2A2	-2.93367	1.8208	2.27604	1
PLCG2	-1.50536	0.913963	0.900911	1
HMOX1	-2.15505	0.356568	-0.225013	1
CYR61	-1.65287	0.0359213	-0.165462	1
CYB5A	-1.69854	0.14924	-0.230176	1
SERTAD1	-1.59859	0.794358	0.609478	1
GRAMD3	-1.70103	0.347479	0.397992	1
STAC2	-2.18888	1.20441	1.52402	1
VPS37B	-1.87144	0.578371	0.238574	1
3830432H09RIK	-3.16691	0.452256	0.616336	1
FAM221A	-1.52598	1.34091	1.30907	1
CBX7	-1.4646	0.760472	0.854218	1
SQSTM1	-1.73523	0.840494	0.253295	1
0610040F04RIK	-1.35975	0.134037	0.0542381	1
DNAJA4	-1.63493	1.09063	1.33676	1
TCEAL1	-1.67897	0.833879	0.901183	1
IL18R1	-2.19215	0.870872	0.686059	1
LIPA	-2.50317	1.54469	1.71093	1
TNS4	-2.98715	1.47128	0.964037	1
PLEKHG6	-1.39655	1.25535	1.22686	1
DBP	-2.31694	0.764249	0.896813	1
SLC3A2	-1.571	0.931356	1.00557	1
KCNH1	-1.76287	-0.389508	-0.414732	1
BTN1A1	-2.89806	1.60099	1.63633	1
LYPD3	-2.52147	1.10448	0.705771	1
HP	1.59349	1.67724	1.71848	1
FAM188B	-1.81016	1.23913	1.26332	1
PER1	-1.59598	0.620977	0.696328	1
TRIB1	-1.65778	0.332783	0.317291	1
ENPP5	-1.27643	0.678676	0.598837	1
DUSP5	-2.54424	0.615007	0.528617	1
ALOXE3	-2.39078	0.906788	0.124972	1
PLA2G4A	-2.15264	1.82307	1.91052	1
SORL1	-1.69034	0.66014	0.80457	1
GRID2	-4.19312	2.5259	2.78304	1
CBR2	-2.70621	1.76785	1.57851	1
GM16159	-2.24884	1.15012	1.15534	1
CRY2	-1.47946	0.20831	0.191567	1
RNF39	-2.19139	0.643415	0.572022	1
GM13889	-2.26799	0.443059	0.24518	1
FAM129B	-1.02214	0.585931	0.553456	1
SELENBP1	-1.87479	0.745873	0.859405	1
MOB3A	-1.25706	0.0524179	-0.0584453	1
EPHX1	-1.62757	0.749471	0.752266	1
DPPA1	-3.89937	0.727783	0.717454	1
UBE2F	-1.4548	0.956164	1.01702	1
PAK6	-2.34666	1.10554	0.823288	1
PDZK1IP1	-1.73214	1.31207	1.13241	1
MOB3C	-1.4775	0.761216	0.685857	1
ADAMTS13	-2.70086	1.72333	2.08415	1
SMPDL3A	-1.6221	1.16744	1.1345	1
LONRF1	-1.3617	0.920953	0.875961	1
SCARA5	-2.18029	1.69804	1.81971	1
AA986860	-2.62432	0.742211	0.377607	1
KHDRBS3	1.49285	0.811873	0.888293	1
IFIH1	-1.66474	1.12783	0.987394	1
ERRFI1	-2.02192	0.329343	-0.185858	1
FGB	-2.33736	0.074075	0.0900249	1
LY6D	-1.68938	0.144087	0.037064	1
PPP1R15A	-1.25798	0.426107	0.454252	1
USP2	-2.38459	1.56182	1.95709	1
ACTG1	-1.16088	-0.0262277	-0.145887	1
LGR5	-2.22374	0.531814	1.37706	1
MAFK	-1.80272	0.700212	0.468152	1
PHF1	-1.35684	0.872601	0.759095	1
MGAM	-2.38696	0.443235	-0.0965723	1
CSRNP1	-1.64906	0.681019	0.636815	1
GOLIM4	-1.26732	0.849669	0.885642	1
GSTM1	-1.26923	1.07983	1.04199	1
FAM131A	-1.43805	1.04658	0.987026	1
WDR72	-2.5637	1.23808	1.14089	1
ELL	-1.16117	0.561721	0.539311	1
ITGA8	-2.41653	2.37301	2.49194	1
KCNQ1	-2.30948	1.91135	2.21499	1
WEE1	-1.18647	-0.0848007	-0.229981	1
CD44	-2.27559	0.848524	0.686739	1
MMP16	-1.97512	1.29542	1.34374	1
ATP2C2	-2.34538	0.67553	0.374259	1
GARNL3	-2.14955	1.6415	1.85573	1
DEPTOR	-1.73175	1.00752	1.26535	1
RAB7B	-2.44929	0.744743	0.374944	1
AQP5	-1.7331	0.49909	0.707754	1
EPHA2	-1.82123	0.675888	0.440182	1
HCAR2	-1.43639	0.666934	0.048473	1
CP	-1.94673	1.66446	1.60278	1
PLCL1	-1.70561	0.904155	0.51678	1
NCALD	-2.22536	1.75222	1.70371	1
EFNA1	-1.78986	1.16262	0.865068	1
RORA	-1.6821	0.735414	0.783966	1
LDLRAD4	-1.99051	1.40282	1.33383	1
ITM2B	-1.23831	0.905163	0.885895	1
WNT7B	-1.66772	0.734244	0.952976	1
FAM84A	-2.25313	0.995862	0.688849	1
CHRDL2	-2.94147	1.62754	1.80074	1
A630023A22RIK	-3.00856	3.35431	3.65514	1
LIPH	-1.8522	0.998749	0.457322	1
2610528A11RIK	-2.41099	1.33394	1.41165	1
E030013I19RIK	-2.5944	2.40471	2.62404	1
HDAC11	-1.67806	0.721554	0.786371	1
TUBB2A	-2.00965	0.674171	0.2757	1
TMBIM1	-1.17593	0.705167	0.478564	1
CIDEA	-2.37707	2.76863	2.69745	1
4930539E08RIK	-2.62258	1.3508	0.35094	1
GNA14	-1.80599	1.25349	1.4873	1
TTLL10	-1.41361	1.20582	1.50031	1
MASP1	-2.14863	1.58448	1.62693	1
CD68	-2.13119	0.758008	0.304814	1
SRXN1	-1.98229	0.722547	-0.0872801	1
BEND5	-1.40454	0.685609	0.567023	1
CNTNAP4	-3.57388	2.09237	1.75907	1
NR3C2	-1.37605	0.73236	0.77787	1
PTAFR	-1.57854	1.212	1.34101	1
C4B	-2.04971	2.22745	2.17092	1
MAOB	-2.12727	1.24966	1.47071	1
CDHR1	-2.75109	1.33993	1.43082	1
ASIC1	-2.53495	0.600153	0.828383	1
CREB3L1	-1.29754	0.572369	0.66411	1
BTBD11	-1.32046	0.916648	0.924148	1
PRELP	-1.97851	2.3256	2.54246	1
CYP2D22	-2.06012	2.29999	2.22241	1
NR1D2	-1.15074	0.519759	0.244208	1
ACBD4	-1.15361	0.668658	0.862978	1
OSGIN2	-1.60117	1.73271	1.92653	1
COQ10B	-1.57501	0.849272	0.762956	1
P4HTM	-1.48952	1.28313	1.48421	1
RNASEL	-1.61354	0.848719	0.631101	1
AGT	-2.16491	1.81104	2.16085	1
MILL2	-1.5965	1.03807	0.879821	1
NR1D1	-1.72565	0.531917	0.3488	1
MOCOS	-1.03688	0.717552	0.941517	1
BC016548	-2.27498	1.68934	1.49288	1
BTG2	-1.54517	0.00894536	-0.00314062	1
HOMER2	-1.12624	0.237351	0.419915	1
CHKA	-1.51537	0.579952	0.602974	1
PER3	-1.47957	1.07522	1.12841	1
IL17RE	-1.11607	0.713759	0.920496	1
PINC	-2.88006	0.890703	0.885308	1
BASP1	-1.53959	0.607016	0.514342	1
FOSB	-1.76341	1.27544	1.24462	1
RORC	-1.6506	0.990868	1.24907	1
CD81	-1.48034	1.13393	1.10732	1
CHRNB1	-1.14533	0.734997	0.817915	1
TNK2	-1.45724	0.459513	0.533281	1
ZBTB21	-1.10061	0.361884	0.336514	1
CCDC85B	-1.85232	0.694106	0.325815	1
MCL1	-1.40113	0.667127	0.556608	1
5330417C22RIK	-1.56327	1.41115	1.47218	1
KRT80	-1.85459	-0.153986	-0.517498	1
SPNS3	-2.25769	1.03365	0.771787	1
BGLAP3	-2.18615	1.47932	1.52436	1
PRKCA	-1.19929	0.612107	0.572197	1
MME	-1.34019	1.305	1.54238	1
PLET1OS	-2.41919	1.26361	0.951223	1
SFRP2	-2.24944	-0.0324036	-0.309963	1
SH3D21	-1.28687	0.552199	0.629541	1
WSB1	-1.09066	0.444164	0.406332	1
FOSL1	-2.05382	0.745709	0.287308	1
DUSP14	-1.90927	0.59117	0.30942	1
NDRG1	-1.54179	0.778544	0.454743	1
SLC2A1	-1.50254	0.636223	0.294857	1
ATF3	-1.61025	0.891924	0.942671	1
HBEGF	-1.51504	0.445853	0.0186225	1
PLET1	-2.41782	1.26359	0.956871	1
PLEKHF1	-1.61582	1.33383	1.28186	1
YOD1	-1.53298	0.601334	0.15561	1
KLF6	-1.0363	0.118267	0.0571251	1
RFTN1	-1.91226	1.52385	1.58511	1
BTG1	-1.33333	0.842689	0.641795	1
PCF11	-1.18673	0.614129	0.724342	1
IGSF8	-1.0054	-0.0148757	-0.130219	1
RB1	-1.80527	1.43439	1.49955	1
UBC	-1.05249	0.300622	0.330239	1
FBXL5	-1.03218	0.823317	0.70329	1
R74862	-1.41721	1.09885	1.07685	1
TEF	-1.51668	0.525348	0.564451	1
FAM13A	-1.82379	0.713356	0.644829	1
ITPR2	-1.41626	1.13187	1.20242	1
PIR	-2.00326	-0.287299	-0.1433	1
PCDHAC2	-1.99578	-0.446103	-0.387426	1
D530049I02RIK	-2.93455	1.03389	0.822771	1
CEACAM1	-1.74942	0.857645	0.59474	1
LITAF	-1.43475	0.471056	0.390665	1
RASSF1	-1.22743	0.395168	0.214878	1
DNAJC12	-1.33213	-0.100024	-0.246691	1
MFGE8	-1.707	1.66176	1.58964	1
DNMBP	-1.10358	0.337942	0.1973	1
FBXL4	-1.038	0.85442	0.788557	1
ANGPT1	-2.05456	2.1618	2.44604	1
SLC9A4	-2.90689	0.774043	0.95578	1
SLC19A2	-1.39551	0.405157	0.24661	1
LRIG1	-1.26823	0.921233	0.824953	1
TPPP	-1.31147	1.61854	1.72382	1
KLHL21	-1.6214	0.720754	0.385622	1
FBXW4	-1.27108	0.730311	0.522413	1
CHST1	-2.01329	1.16639	1.63287	1
SLC41A2	-1.81907	2.33369	2.25193	1
RARA	-1.17318	0.963425	1.10982	1
SLC39A14	-1.63882	1.22133	0.979627	1
FAM120AOS	-1.08731	0.761771	0.873307	1
SLC45A3	-1.37497	1.01161	0.975325	1
KLHDC1	-1.44992	1.49457	1.67642	1
PRR5L	-1.33433	0.550855	0.62824	1
ADCK3	-1.42433	1.18377	1.31495	1
ETV1	-2.05144	1.3951	2.33028	1
NOCT	-1.01638	0.143178	0.0772468	1
GGH	-1.04358	0.460237	0.411785	1
MAGIX	-1.71927	1.39214	1.17914	1
COPZ2	-1.24811	1.03895	1.01869	1
EPHB3	-1.90647	0.827425	0.427059	1
PLAUR	-1.60785	0.666414	-0.061695	1
RDH12	-2.36718	0.651989	0.947122	1
TMEM184A	-1.00722	0.77265	0.695384	1
D930015M05RIK	-1.37564	0.168406	0.264186	1
PRDM1	-1.1513	0.340342	0.245571	1
ME1	-1.47101	1.09085	1.10071	1
1500015A07RIK	-2.17316	0.782861	0.212662	1
LONRF3	-1.51879	0.485049	0.000360361	1
PXDC1	-1.42741	0.726001	0.504782	1
TOLLIP	-1.15742	0.162157	-0.0825813	1
SYBU	-1.83456	1.13218	1.02291	1
CFAP43	-2.464	1.43852	2.21142	1
FXYD3	-1.51881	1.0364	1.0076	1
CLTB	-1.1462	0.507244	0.289469	1
ST6GALNAC6	-1.93052	1.16658	1.197	1
NQO1	-1.95699	2.0825	2.13306	1
DENND1C	-1.67585	1.00949	0.680962	1
PIEZO1	-1.44343	0.919916	0.44062	1
PROB1	-1.44382	1.52547	1.80869	1
ARRDC4	-1.44571	0.510101	0.445459	1
PLIN2	-1.5492	0.569114	0.38589	1
LGI4	-1.50375	1.01846	1.00626	1
FAR1	-1.37383	1.00412	1.0354	1
CHL1	-2.53626	1.99001	2.37645	1
IRAK2	-1.42438	1.22752	1.25238	1
TUBA4A	-1.89615	1.10478	1.11017	1
ZFP36	-1.01646	0.179401	0.190914	1
CRISPLD2	-1.4805	0.373168	0.278903	1
SLC34A2	-1.78961	2.13212	2.28454	1
DPP4	-2.16002	0.93934	0.913299	1
RNF125	-1.0214	0.558673	0.372976	1
PDE7B	-2.15167	1.3238	1.4213	1
RASSF4	-1.60041	2.10664	2.36936	1
JUNB	-1.26858	0.505994	0.475867	1
ZFP704	-1.02053	0.710514	0.969199	1
PDZD2	-1.41517	1.32084	1.42996	1
SPG20	-1.02266	0.575746	0.663298	1
CISH	-1.12455	-0.202798	-0.330434	1
PAPLN	-1.16791	0.96826	0.903077	1
SLC46A3	-1.25501	0.133702	-0.0161296	1
GM4926	-3.07019	0.389116	0.502372	1
DUSP8	-1.35998	0.134796	-0.123474	1
NDEL1	-1.23963	0.27619	0.0837941	1
2310001H17RIK	-1.77311	1.20351	1.70167	1
EFHD2	-1.74432	0.568896	0.201786	1
DTNA	-2.15533	2.08374	2.16861	1
S100A16	-1.30448	0.730579	0.444103	1
SHROOM1	-1.38684	1.70486	1.86457	1
EGR2	-1.07521	0.283853	0.373979	1
NAPRT	-1.40403	0.56882	0.49528	1
SPNS2	-1.22419	1.12429	1.06403	1
ITPKC	-1.50191	0.702589	0.121163	1
KRT18	-1.22446	0.345745	0.144631	1
SFN	-1.54557	0.0910014	-0.205381	1
IER5	-1.4524	0.522455	0.36903	1
REG3G	-1.50859	0.207847	-0.0984342	1
XDH	-2.10752	1.98344	2.28335	1
FHL2	-1.12833	0.366062	0.212737	1
SLC9A2	-2.40449	1.47987	1.6578	1
CEBPD	-1.67934	1.07466	0.820966	1
TBC1D10A	-1.01884	0.520306	0.299976	1
TMEM251	-1.19836	0.700502	0.346484	1
TMEM52	-1.55618	0.656033	0.681334	1
LIPM	-2.58385	1.83804	1.95197	1
ANTXRL	-2.6925	2.76751	3.1765	1
AHNAK	-1.39907	0.994313	1.01029	1
TSPAN8	-2.07248	1.88882	2.05233	1
LMNA	-1.61556	0.886666	0.807179	1
B3GNT8	-1.81712	1.3222	1.53138	1
SLC25A25	-1.31858	0.226272	-0.134083	1
ZSWIM4	-1.5238	0.273033	-0.0556508	1
TM4SF1	-1.62263	1.04086	0.477676	1
SLC25A36	-1.16174	0.488441	0.538303	1
STEAP2	-1.31167	-0.0911943	0.323145	1
PGM5	-1.27222	0.960518	1.36846	1
PLEKHA6	-1.03871	0.0482024	-0.00972776	1
GSTT1	-1.49511	1.65391	1.79303	1
IL6RA	-1.12753	0.626887	0.255143	1
CPSF4L	-2.30231	1.68673	1.75567	1
OASL1	-1.54467	1.15222	-0.0643462	1
HAPLN3	-1.36476	1.45186	1.47351	1
ARHGEF37	-1.22605	0.57659	0.790241	1
PRSS35	-2.4437	2.03019	2.55397	1
FAR1OS	-1.38915	0.966808	1.01498	1
GCA	-1.07517	0.516812	0.425001	1
TUBA1C	-1.40533	0.688612	0.163036	1
GM9920	-1.82913	1.02217	1.25001	1
PHF11D	-1.30876	0.95887	0.466968	1
TMEM185B	-1.00271	0.264596	0.0586882	1
LY6K	-1.8823	0.715271	0.641184	1
EGR1	-1.27324	0.465902	0.618094	1
RHOU	-1.27186	0.451817	0.328016	1
GNA15	-1.88516	0.865836	0.85784	1
GPRASP2	-1.67389	1.14605	1.19172	1
CD14	-1.90041	1.36722	1.17746	1
ILVBL	-1.05772	0.838905	0.820572	1
ABCB9	-1.64772	1.44416	0.679775	1
SOX6	-1.51172	0.627261	0.756502	1
PEG13	-1.27149	0.370055	0.0880928	1
P2RX2	-2.41647	1.30654	1.34723	1
SH3BP2	-1.43665	0.572976	0.256289	1
PLEKHM2	-1.34153	0.735798	0.386582	1
S100A13	-1.06439	0.776365	0.533758	1
TUBB6	-1.28822	0.665884	0.133329	1
PTPRZ1	-2.21655	1.31636	1.26607	1
FAM49A	-1.38355	0.814869	0.862474	1
KITL	-1.0739	0.940371	0.823044	1
PTN	-1.57595	-0.799772	-0.698366	1
CCDC129	-1.82892	1.2226	1.28788	1
HAL	-2.4502	0.130887	-0.0975963	1
SLC41A1	-1.13274	0.865011	0.845506	1
TRPC6	-1.54554	-0.643897	-0.611001	1
BLNK	-1.31765	-0.764076	-0.450806	1
HILPDA	-1.41772	1.50014	0.807128	1
SERTAD2	-1.14601	0.547133	0.471351	1
1700030A11RIK	-2.46138	1.05293	0.0659727	1
KLF9	-1.00204	0.309749	0.312339	1
SUSD6	-1.07805	1.03012	0.8947	1
HPGD	-1.10192	0.371089	0.376667	1
LIMA1	-1.10516	0.97656	1.16146	1
LAO1	-2.78406	1.08455	0.984877	1
DYNAP	-2.37253	1.05042	1.22583	1
EGLN3	-1.69846	-0.0118238	0.392422	1
TGIF1	-1.09736	-0.021121	-0.35852	1
FUT9	-1.80481	1.05846	1.38345	1
RHOV	-1.39631	0.432635	0.232326	1
GCH1	-1.55719	0.949605	0.332593	1
TOB2	-1.12147	0.640286	0.573776	1
SFRP1	-1.04998	0.529675	0.360149	1
PTGES	-1.37798	1.04033	0.700511	1
KISS1R	-1.62761	1.34172	0.997579	1
CPEB4	-1.33936	0.753797	0.713003	1
P2RY2	-1.68701	0.876791	0.238944	1
ACSL1	-1.02995	0.278407	0.285439	1
TAT	-2.39235	1.35224	1.94501	1
TRP53BP2	-1.05192	0.656489	0.780921	1
MFSD7A	-1.27478	0.440462	0.717309	1
PTPN18	-1.03928	0.904629	0.913482	1
CYP4X1OS	-2.76341	0.121813	0.566273	1
SPAG9	-1.03333	0.566039	0.128516	1
STK40	-1.23629	0.417377	0.330816	1
APOD	-1.85686	2.48344	2.7675	1
SOWAHB	-1.57586	0.604259	0.502701	1
IQSEC1	-1.01745	1.27346	1.33125	1
AGFG2	-1.30906	0.89029	0.649771	1
RHPN2	-1.21005	0.807104	0.754843	1
FNIP1	-1.17591	0.645993	0.308759	1
ATF4	-1.01352	0.524775	0.478303	1
PIP5K1B	-1.09325	0.427815	0.365142	1
ABHD14B	-1.15564	1.12033	1.01059	1
NTN1	-1.43614	1.4219	1.3792	1
FOLR1	-1.22504	0.558074	0.274571	1
QPCT	-1.13908	0.672603	0.374554	1
SLC35D3	-2.31188	-0.322905	1.07885	1
PTTG1IP	-1.10055	0.671863	0.158549	1
LRG1	-1.52055	1.0585	0.919362	1
CACNB1	-1.17253	0.751548	0.886878	1
ANK	-1.7774	0.86835	0.962204	1
HLF	-1.67244	1.0366	1.26473	1
A330041J22RIK	-1.46885	1.21381	1.13148	1
CXCL1	-1.64556	0.68725	0.13965	1
ITGB6	-1.4188	1.27865	1.07228	1
SRF	-1.05229	-0.0455396	-0.0648325	1
TTC22	-1.20667	1.2473	1.36667	1
FAS	-1.22215	1.45522	1.14158	1
SLC35E4	-1.4951	0.730337	0.446089	1
SCNN1A	-1.62384	0.589297	0.685798	1
IFI202B	-1.77774	1.19391	0.435093	1
CDH18	-2.46422	-0.0223378	-0.0113883	1
PLAGL1	-1.4479	0.864919	0.89431	1
E230016M11RIK	-1.01086	0.407356	-0.118647	1
TMEM229B	1.33338	0.634531	1.00995	1
MIDN	-1.17093	0.362877	0.275986	1
DCXR	-1.33633	1.00366	0.841603	1
GPC6	-1.21771	-0.180719	-0.0422344	1
PARTICL	-1.21225	0.763531	0.574041	1
SDC4	-1.27618	1.03106	0.622171	1
FHAD1	-1.80539	-0.324678	-0.0821204	1
PSTPIP2	-1.42182	-0.399309	-0.446628	1
MYC	-1.09234	0.846018	0.778592	1
BAIAP2	-1.08991	0.929412	1.09252	1
CLIP4	-1.46898	-0.875201	-0.82883	1
WNK2	-1.49178	1.74812	1.94341	1
ABCC3	-1.19171	1.10717	1.37302	1
OLFML2B	-1.16311	-0.305854	-0.655852	1
IRGQ	-1.09304	0.207908	-0.0575284	1
DUSP7	-1.22611	-0.20325	-0.192672	1
MFSD6L	-1.345	0.415351	0.220418	1
MGAT1	-1.08366	0.259483	0.112192	1
PPP1R2	-1.21665	1.0178	1.08113	1
CNNM2	-1.1973	0.988279	1.02678	1
NFKB1	-1.20885	0.899499	0.844649	1
MAR3	-1.2551	1.04614	0.917798	1
TMEM25	-1.38981	0.752838	1.55203	1
D730001G18RIK	-2.16803	1.50745	2.20201	1
CREM	-1.26648	0.782402	0.553282	1
GRIK3	-1.64017	1.65407	1.62528	1
ACKR3	-1.19197	0.576082	0.681813	1
FAM107B	-1.4997	0.335912	-0.334126	1
GM13293	-2.50442	1.71237	1.84356	1
TMEM154	-1.463	0.869461	0.887572	1
CLCF1	-1.60836	1.34899	0.766233	1
ATP6V1B1	-1.87249	1.0555	1.41883	1
SP4	-1.1689	0.488035	0.378285	1
SLCO1A5	-1.65985	1.49053	1.55467	1
SMOC2	-1.6293	0.188813	0.315358	1
TLR4	-1.25435	0.689171	0.487367	1
ERBB2IP	-1.01255	0.87154	0.843675	1
ZBTB42	-1.0032	0.393203	-0.0515855	1
CAR8	-1.05464	1.06148	1.25744	1
FGD3	-1.78327	0.746091	0.0222476	1
CKMT1	-1.27851	0.789308	0.753493	1
FAM46A	-1.59949	0.777962	0.839497	1
ARL4D	-1.371	0.995742	0.466323	1
CTSC	-1.34539	1.46227	1.41509	1
MAT2A	-1.22528	0.640397	0.394263	1
PRTN3	-1.64597	2.66712	3.0155	1
SPRY4	-1.17242	0.567735	0.637427	1
SLC1A1	-1.90612	1.43054	1.58776	1
ZSWIM6	-1.24679	0.537424	0.739394	1
KCNK5	-1.58434	0.656845	0.367508	1
TANC2	-1.16912	0.818011	0.755067	1
EPPK1	-1.39876	-0.219194	-0.163767	1
NR4A3	-1.50718	0.949486	1.11472	1
FOSL2	-1.17832	0.58823	0.535308	1
GALM	-1.24583	0.91276	1.03203	1
CHMP4C	-1.10451	0.777247	0.69127	1
TSPAN1	-1.31196	-0.824051	-0.771096	1
DAPP1	-1.13847	0.903423	1.16032	1
EYA2	-1.18718	1.06678	1.37992	1
CCRL2	-1.38544	0.744515	0.741132	1
ZC3H12A	-1.52597	0.662684	-0.0394183	1
CHIL1	-2.28496	1.68138	1.49464	1
NR4A1	-1.13165	0.901463	1.27051	1
HS3ST3A1	-1.70101	0.631687	1.06724	1
GRAMD1C	-1.11558	0.249431	0.300867	1
CLCA3A2	-1.08697	1.99043	2.21483	1
RAI14	-1.06489	0.553539	0.554439	1
PKIB	-2.43542	0.975458	0.933954	1
ENDOD1	-1.05611	0.539996	0.390087	1
PQLC1	-1.01311	0.37949	0.296031	1
FAM83H	-1.10981	0.342317	-0.0118826	1
GM10389	-1.47602	0.850472	0.543526	1
SLC16A7	-1.52411	1.12944	1.03836	1
BC064078	-1.25934	0.300021	0.352451	1
ABHD17C	-1.02683	0.164928	0.177957	1
MFI2	-1.82194	1.30313	1.23857	1
MIRT1	-1.77434	-0.276245	-0.382795	1
B230319C09RIK	-1.95224	0.826442	0.52041	1
P3H2	-1.08946	0.223702	0.426188	1
AGPAT9	-1.13507	-0.130083	-0.570368	1
PITPNM3	-1.39582	1.59732	1.60363	1
PRSS16	-1.12586	0.756854	0.799016	1
ANXA2	-1.04533	0.904463	0.686862	1
TCF7L2	-1.11601	0.762358	0.961887	1
CRACR2B	-1.06417	0.913046	1.07555	1
CREBL2	-1.31301	0.478722	0.530806	1
CSTAD	-2.00834	1.27292	1.71089	1
SYCP3	-1.12922	0.738715	0.804846	1
ZFP36L2	-1.05313	0.538817	0.588979	1
COL8A2	-1.34284	0.704431	0.534698	1
HEY2	-1.66939	1.45628	1.26447	1
SKIL	-1.19275	0.565622	0.495965	1
JMJD4	-1.22826	-0.00908968	-0.19829	1
S100A1	-1.02118	1.01169	0.846192	1
2610305D13RIK	-1.04694	0.0262144	0.0110775	1
PMEPA1	-1.25099	0.654059	0.450717	1
SERPINB5	-1.05742	1.13487	1.18566	1
ENPP3	-1.39366	1.52014	1.59238	1
9330188P03RIK	-1.57089	1.82985	1.93555	1
MFSD7B	-1.16291	1.01203	0.907489	1
CITED2	-1.39726	0.945154	0.862482	1
RUNX2	-1.65077	1.26788	1.68361	1
TULP1	-1.54551	1.01503	1.30113	1
NEAT1	-1.17791	1.37985	0.900242	1
GGT5	-1.02165	1.09611	1.16834	1
SPP1	-2.33472	1.93259	1.67787	1
CX3CL1	-1.31348	1.20895	1.24307	1
TLR2	-1.04002	0.39838	0.0308824	1
TRIM14	-1.0304	1.08593	1.47283	1
IER3	-1.32722	0.482083	0.0849246	1
CAR2	-1.42583	0.299642	-0.27558	1
ISOC1	-1.05629	0.976218	0.972167	1
CELF4	-1.37056	-0.142048	0.0289047	1
MAP3K5	-1.08924	0.853003	0.875915	1
CLDN1	-1.57892	0.333529	0.00297951	1
ARL13B	-1.18531	0.719492	0.699587	1
GM15908	-1.63329	0.701299	0.909298	1
S100G	-1.66656	1.11757	1.87347	1
TNIP2	-1.00064	0.677648	0.644119	1
COL11A1	-1.51115	1.4878	1.95414	1
SUGCT	-1.52429	1.12753	1.52962	1
TTC36	-1.45334	2.06904	1.74773	1
TCTE2	-1.3463	0.902887	1.05835	1
PPP1R36	-1.36934	0.964806	1.10805	1
TNFRSF12A	-1.33211	0.630548	0.0297635	1
CLIC6	-2.08457	1.52156	1.62591	1
NOD1	-1.10349	0.552431	0.555964	1
GM5434	-1.3655	1.07703	1.1465	1
FOS	-1.18315	0.788588	0.853055	1
TMTC2	-1.40214	1.29018	1.27272	1
SMAD7	-1.09316	0.067973	-0.134378	1
FTX	-1.36912	1.12742	1.34839	1
AASS	-1.28053	0.975149	0.896234	1
ZFP438	-1.20739	0.562035	1.00022	1
9330151L19RIK	-1.05418	1.01436	1.16058	1
PIK3R1	-1.13699	1.2885	1.55041	1
RNF19B	-1.02237	0.597004	0.122761	1
ANXA9	-1.01606	0.293957	0.332725	1
A530013C23RIK	-1.94957	1.41872	1.26157	1
UNC5CL	-1.44861	1.65657	1.62162	1
SLC16A2	-1.19149	1.41017	1.37169	1
1700024P16RIK	-1.44077	1.6615	1.58294	1
SNTA1	-1.19923	1.12917	1.12116	1
SIK1	-1.00052	0.544213	0.485689	1
LPIN1	-1.02091	0.355241	0.450547	1
CXCL2	-1.64832	0.866356	0.203125	1
MUC20	-1.18507	0.433308	0.397945	1
FAM102A	-1.1123	0.531758	0.334597	1
P2RY6	-1.32991	1.59871	1.02243	1
SPA17	-1.33911	0.995015	0.773365	1
MET	-1.22068	0.902774	0.656391	1
LGALS3	-1.66078	1.44145	1.28154	1
KLK11	-1.31565	0.396233	0.610223	1
MAP2K3	-1.18955	0.542414	0.267232	1
A230020J21RIK	-1.2156	0.991828	0.905832	1
DNAJB13	-1.51485	1.20643	1.06754	1
PDE4B	-1.29951	1.13765	0.904037	1
CHRM1	-1.52959	0.786243	0.923157	1
MYLIP	-1.17197	0.932915	0.765349	1
ANG4	-1.2073	0.467557	0.0295379	1
ZFP202	-1.04187	0.770545	0.578171	1
SOX9	-1.2676	0.985162	0.99157	1
CD177	-1.79404	0.491937	0.444498	1
GALNT15	-1.10198	1.14848	0.792557	1
IPPK	-1.12341	0.505616	0.355065	1
OSBPL1A	-1.05583	0.640699	0.847653	1
ZDHHC14	-1.11652	1.50876	1.63179	1
MBP	-1.02275	0.637782	0.518011	1
ZFP395	-1.24152	1.03841	1.2488	1
TC2N	-1.00962	1.07087	1.12049	1
RFTN2	-1.40451	1.7674	1.80118	1
SHF	-1.04963	0.940106	1.01809	1
IL15RA	-1.0058	0.486872	0.445738	1
HSPA1A	-1.14165	0.413318	0.983006	1
JUN	-1.32725	0.759406	0.77521	1
TPSB2	-2.17743	0.0659456	0.382349	1
FAM110C	-1.44737	1.336	0.851925	1
CRY1	-1.30309	0.450242	0.0215718	1
RGMA	-1.0959	0.940844	0.832785	1
TNFRSF11A	-1.02862	0.565887	0.531143	1
SLC13A2OS	-1.71767	2.46341	2.31176	1
LALBA	-2.08875	1.30883	1.34955	1
PCDHB17	-1.0783	0.443582	0.646444	1
ALDOC	-1.18057	1.14063	1.28408	1
FCGBP	-1.41561	1.55352	1.28235	1
SLC5A1	-1.26984	0.304918	0.349367	1
CRB3	-1.08062	0.309211	-0.0568267	1
HSPA1B	-1.07254	0.340396	0.871354	1
CPN1	-2.16866	0.395595	-0.166416	1
IL17RB	-1.41518	0.958934	1.22653	1
TPRN	-1.05767	0.70244	0.535188	1
CSN3	-2.02613	1.75908	1.70433	1
ARHGEF6	-1.8989	1.32177	1.25328	1
A330023F24RIK	-1.97385	0.919606	0.856032	1
5830428M24RIK	-1.57992	0.944449	0.598533	1
ADCY5	-1.39659	0.911728	1.08313	1
INHBB	-1.27162	1.2235	1.48218	1
CGREF1	-1.28124	1.05349	0.341094	1
ABTB2	-1.18273	0.224439	-0.075135	1
C130050O18RIK	-1.60541	1.51096	0.953193	1
9030619P08RIK	-2.12358	0.288982	0.295758	1
CAR13	-1.1505	1.01376	0.884868	1
GAREM	-1.00278	0.685578	0.694004	1
TNFSF18	-1.87376	0.977478	0.736842	1
ANPEP	-1.12825	1.43497	1.60999	1
GFRA3	-1.41318	0.280814	0.234514	1
VASN	-1.10896	0.719242	0.416987	1
FAM46B	-1.38562	1.29436	1.58691	1
HMGCLL1	-1.60607	1.73957	2.36614	1
LMX1B	-1.15606	0.576841	0.652699	1
GM16938	-1.92778	0.346036	1.53238	1
VSTM4	-1.20548	0.249123	0.244451	1
NHS	-1.84495	0.887234	0.969162	1
PDXK	-1.04216	1.00191	0.806528	1
RBM12B2	-1.02621	0.640563	0.548545	1
BGLAP2	-2.06869	1.20439	0.953132	1
GPR3	-1.30391	0.738527	0.239162	1
HIVEP3	-1.16388	1.07767	1.16055	1
SLC15A5	-1.26117	1.22069	1.02249	1
GPR137C	-1.3555	0.880526	0.89778	1
SLC10A5	-1.79445	-0.0668355	0.0510643	1
LRRTM2	-1.18431	0.283738	0.265503	1
ENKUR	-1.35747	1.15222	1.22277	1
SH3RF2	-1.39054	0.515224	1.01841	1
ALDH1A3	-1.27467	0.71496	0.814454	1
MAP2K3OS	-1.2695	0.678722	0.410797	1
PHLDA2	-1.48073	1.04448	0.932622	1
SLC22A21	-1.00515	0.635103	0.732803	1
TRIM34A	-1.34267	1.04805	1.0546	1
MOB3B	-1.01756	0.39621	0.53239	1
AU022754	-1.24019	0.59361	0.775338	1
RTP4	-1.0499	1.43693	0.105875	1
STARD8	-1.04971	1.06124	1.18485	1
6030466F02RIK	-1.97235	0.416612	0.529032	1
SOAT2	-1.9893	1.44887	1.35844	1
C1QTNF3	-1.93267	0.611524	0.287992	1
F930015N05RIK	-1.55471	0.865028	0.934579	1
HS6ST3	-1.86317	2.02738	1.5147	1
EDNRA	-1.40533	1.30019	1.45835	1
KCNMB2	-1.74574	-0.154673	-0.145583	1
MIR1938	-1.52593	0.970172	1.03213	1
9830166K06RIK	-1.78193	0.995036	1.41661	1
SLC26A9	-1.30617	0.107191	-0.0904284	1
CXCL16	-1.0053	-0.0672445	-0.67784	1
WFDC3	-1.12905	1.94345	2.15025	1
NKPD1	-1.66566	-0.0972054	0.216097	1
STBD1	-1.08414	0.482716	0.404408	1
MKX	-1.4213	1.01966	1.18969	1
PROCA1	-1.12444	0.89542	0.889124	1
FAM198A	-1.37698	2.09025	2.2417	1
MIR328	-1.01323	0.750992	0.762945	1
RASGEF1C	-1.73072	1.38148	1.66508	1
MUC1	-1.18448	0.436844	0.39336	1
ESRRG	-1.33161	0.459898	0.263184	1
TIAM2	-1.09222	1.34776	1.54496	1
BC016579	-1.35136	0.0549047	-0.21011	1
PCDHB11	-1.03847	0.905255	1.08049	1
4931406H21RIK	-1.52367	1.82795	1.55781	1
TMC7	-1.07678	0.894367	0.83652	1
GM19434	-1.63735	1.33045	1.21189	1
WNT5B	-1.0349	1.12463	0.966434	1
OASL2	-1.00917	1.02502	0.0281782	1
SLC16A4	-1.27043	0.490593	0.514667	1
RAC3	-1.00347	0.980792	0.766491	1
DUSP6	-1.15293	1.02614	1.13117	1
LCN2	-1.68063	1.82684	1.49495	1
DDX60	-1.23998	1.15086	0.144108	1
SCN8A	-1.7405	1.61322	1.72072	1
4921511I17RIK	-1.40337	0.611442	1.00033	1
TSPAN33	-1.25264	0.7093	0.307542	1
ERICH2	-1.64843	1.89344	1.77901	1
DEPDC7	-1.33417	1.0098	0.0508152	1
E230025N22RIK	-1.40733	1.49839	1.99144	1
C1RL	-1.27119	0.941807	0.965064	1
OTOA	1.48994	2.14971	2.24182	1
PAQR6	-1.14686	0.988841	1.11917	1
LNCPINT	-1.2164	0.944201	0.821731	1
MCPT4	-1.90563	0.0462007	0.0543971	1
SCML4	-1.24116	1.13473	1.3838	1
ANG2	-1.44437	0.290402	0.330583	1
GM15663	-1.51614	1.31952	1.24556	1
SOX10	-1.22154	0.88604	0.862011	1
CCDC121	-1.87871	1.35755	2.11331	1
NEDD9	-1.04291	1.09903	0.926472	1
PPP1R2-PS3	-1.18739	0.831297	1.13566	1
SLC28A3	-1.13555	0.600047	0.395034	1
OAS1G	-1.22305	1.57588	-0.0545275	1
2900060B14RIK	-1.06545	0.486039	0.516261	1
PLEKHD1	-1.25519	-0.238152	-0.408358	1
LURAP1L	-1.0817	1.12107	0.960621	1
UGT8A	-1.26892	-0.112418	-0.465895	1
CYP4X1	-1.82779	0.307571	0.622005	1
TRF	-1.3282	1.49287	1.41701	1
GNAO1	-1.36258	0.180583	0.132463	1
PRKAA2	-1.1006	0.569008	0.731052	1
FOXI1	-1.62027	1.6544	1.78091	1
ST6GALNAC4	-1.15927	0.939841	0.696907	1
SLC22A4	-1.10408	0.823942	-0.0940668	1
OACYL	-1.0091	-0.131899	-0.0574157	1
FGF23	-1.76794	1.554	1.21675	1
CMA1	-1.81491	-0.0684491	-0.0608729	1
2810468N07RIK	-1.3362	1.53013	1.7903	1
TFAP2E	-1.54441	1.47228	1.78014	1
PALM2	-1.20154	0.767261	1.01633	1
E330011O21RIK	-1.09435	0.81079	0.438587	1
HNMT	-1.27636	1.3895	1.62212	1
E030011O05RIK	-1.07073	0.181296	-0.159003	1
SPACA6	-1.20032	0.744762	0.92304	1
3110079O15RIK	-1.31205	2.17334	3.06558	1
LRRC75B	-1.01939	1.74232	2.15972	1
KIF19A	-1.51105	-0.0951849	0.312816	1
NAT8	-1.52792	0.373382	0.281896	1
UNC80	-1.43891	0.253461	-0.103147	1
RAB17	-1.01477	0.992678	0.674462	1
PTX3	-1.6939	2.10512	2.29746	1
GSTO2	-1.08694	0.687007	0.320739	1
BMP2	-1.30215	0.283991	-0.200574	1
UCP3	-1.48048	0.215004	0.361973	1
C4A	-1.30751	1.45119	1.35192	1
GSTA3	-1.64068	0.405857	0.167108	1
ADRA2C	1.45091	1.19398	1.20731	1
PDE9A	-1.06595	1.39463	1.6913	1
HR	-1.13363	0.367135	0.304539	1
BCL2	-1.18493	0.77304	0.905245	1
SNTG2	-1.3027	1.59551	1.75427	1
9530026P05RIK	-1.12834	0.490417	0.476294	1
SFXN4	-1.16499	0.295645	0.135207	1
PTGER4	-1.01186	0.137628	-0.188744	1
TRIM30A	-1.03582	0.920513	0.586594	1
D7ERTD443E	-1.20063	0.57204	0.483154	1
PEAK1	-1.07504	1.06819	1.11691	1
EXTL1	-1.00415	0.808628	1.1661	1
4930480K23RIK	-1.39796	1.12107	1.67119	1
DMKN	-1.22971	0.49055	0.0635941	1
LIF	-1.22171	0.227995	-0.293237	1
PAG1	-1.24352	0.819945	0.990194	1
TMC5	-1.22128	0.970811	0.748267	1
GM20199	-1.02233	0.953717	0.453892	1
ERBB4	-1.06074	0.258598	0.563637	1
GM10863	-1.20026	1.20478	1.02007	1
ADGRV1	-1.32465	2.03455	1.77825	1
KLF12	-1.0195	0.817451	0.944056	1
IKZF1	-1.08274	0.781857	0.848621	1
ELF5	-1.01119	0.760702	0.93647	1
NAV3	-1.05347	1.18818	1.16283	1
ADAMTS17	-1.3198	0.206014	0.329989	1
SLC5A8	1.02062	1.09845	1.04763	1
PDLIM3	-1.41833	0.913701	0.998513	1
SV2C	-1.32261	-0.779595	-0.835148	1
MTCL1	-1.05427	0.753092	0.565634	1
STKLD1	-1.48071	1.77204	1.8091	1
IGFBP5	-1.4903	0.875128	0.75718	1
CEACAM2	-1.22218	0.120929	-0.434575	1
SLITRK4	-1.53637	0.309608	0.560353	1
NAT8F2	-1.41487	0.485861	0.363444	1
FAM179A	-1.4225	-1.06326	-0.948612	1
RBM11	-1.57291	1.48079	1.79494	1
2610028H24RIK	-1.17743	1.40562	1.05237	1
9530053A07RIK	-1.24898	0.982639	0.706733	1
FFAR4	-1.33804	-0.747701	-0.978287	1
4930405O22RIK	-1.63166	0.849042	0.847047	1
A630019I02RIK	-1.61169	1.97131	1.79279	1
CLDN2	-1.50059	1.06454	1.23072	1
4833427F10RIK	-1.50035	0.587483	-0.0335331	1
A730020M07RIK	1.44977	0.846436	1.49341	1
PCDHA12	-1.56618	-0.436782	-0.430027	1
CPA3	-1.57779	0.0659456	0.0776943	1
BRINP1	-1.16834	0.884888	1.50358	1
GLP1R	-1.56865	0.256308	0.882452	1
1110046J04RIK	-1.34035	1.2223	1.19597	1
LRIT1	-1.58428	1.78364	1.94867	1
RGR	-1.58009	1.86079	2.36568	1
9630028I04RIK	-1.55981	0.636339	1.00747	1
PRAM1	-1.44618	1.50711	1.60619	1
NEK5	-1.22849	0.894439	1.31863	1
CYP2B19	-1.57521	0.289343	1.40018	1
CEBPB	-1.35327	0.970589	0.766724	1
HAVCR2	-1.57554	0.540556	0.626836	1
MIR24-2	-1.1523	0.568986	0.547668	1
PIM1	-1.00816	0.768621	0.499999	1
GPR156	-1.31367	1.01374	0.407819	1
ITGA11	-1.33782	0.583615	0.092485	1
GM15867	-1.18368	1.37464	1.5153	1
BTLA	-0.515334	3.0455	3.44644	1
STC1	0.1584	1.63293	1.77936	1
SCGB3A1	0.797793	2.70239	3.38051	1
SLC13A2	-1.94372	2.60785	2.52155	1
SYNPO	-0.926849	1.28442	1.27221	1
WISP2	-0.478448	1.86858	1.98796	1
ATP13A5	-0.288996	2.65239	3.09368	1
GDPD2	-0.815189	2.03718	2.38361	1
GHR	-0.368346	1.2451	1.22304	1
BCAM	-0.488275	1.09908	1.19702	1
COL9A1	0.0080226	2.03154	2.40528	1
COL4A5	-0.275659	1.52851	1.5142	1
SEMA5A	-0.485583	1.89356	1.61079	1
ME3	-0.84171	1.73577	1.98032	1
NPR3	-0.0477671	2.20088	2.51792	1
GAS6	-0.592914	1.46915	1.53762	1
ESYT3	-0.493172	1.48381	1.52472	1
SECTM1B	0.284546	1.90934	1.96044	1
DHRS9	-0.0516805	2.3034	2.22298	1
PPP1R3C	-0.698369	1.94447	2.36925	1
SULF2	-0.78633	1.04054	1.16411	1
SECTM1A	0.21368	1.79828	1.80193	1
SMG6	-0.479054	1.33364	1.71948	1
KHK	-0.951832	1.08858	0.990711	1
NFASC	0.438035	2.36483	2.17886	1
TNFRSF1B	-0.191484	1.53668	1.62397	1
ITPK1	-0.36787	1.1604	1.27555	1
CEL	0.940813	1.85939	2.00032	1
COL4A6	-0.612797	1.91291	1.96013	1
ELOVL6	-0.258334	1.20935	1.26967	1
TNC	-0.366217	1.87014	2.23654	1
EEPD1	-0.660519	1.32028	1.39432	1
ALDH1L2	-0.696384	1.613	1.37137	1
TMEM180	-0.480698	1.20019	1.45945	1
ALPL	-0.870305	1.80476	1.90219	1
SLC1A4	-0.819329	1.1197	1.03789	1
LPCAT2	-0.999834	1.34202	1.7605	1
SMOC1	0.235241	1.68832	1.70244	1
TEX2	0.389754	1.33706	1.29697	1
FMN1	-0.910624	1.05925	1.16791	1
MAFB	-0.763195	1.7847	1.62752	1
QSOX1	0.888849	1.38388	1.15711	1
PNCK	-0.695412	1.14318	1.10732	1
TEAD4	-0.568381	1.20679	0.839727	1
FZD8	-0.486524	1.16291	1.40929	1
CARD14	-0.672348	1.27454	1.89127	1
ARHGAP6	-0.695939	1.48913	1.60914	1
ACOX2	-0.363585	1.21394	0.940983	1
PIGR	-0.277534	1.59516	1.24427	1
TSPAN2	-0.0946428	1.03783	1.34579	1
FBXO32	-0.890505	1.23775	1.20923	1
ATP10D	-0.673763	1.08851	0.847217	1
VAMP1	-0.902141	1.54057	1.30587	1
SLC25A42	-0.132382	1.48256	1.66038	1
LINGO1	-0.816076	1.44824	1.57304	1
GM5144	-0.125875	1.98549	2.10864	1
BPIFB1	0.273831	1.97733	1.8746	1
PARK2	-0.958046	1.23122	0.971861	1
CELSR2	-0.649502	1.15661	1.14166	1
ABCA4	0.666623	1.31645	1.12294	1
RASL12	0.324079	1.29795	2.15764	1
4931406C07RIK	-0.832952	1.02816	1.31151	1
4921507P07RIK	-0.916794	1.41539	1.45378	1
ADAMTS12	-0.28078	1.01892	1.07122	1
TMEM246	-0.558503	1.00712	1.28293	1
ALDH2	-0.803877	1.07526	1.16098	1
ARHGAP44	-0.614078	1.16773	0.768344	1
ECHDC3	-0.845351	1.13609	1.33445	1
CHST9	0.135887	1.47308	1.79504	1
2010001A14RIK	-0.801583	1.21902	1.23833	1
APOL9A	-1.07313	1.48478	-0.203499	1
ARNTL2	-0.529117	1.27637	1.57934	1
BBOX1	-0.2237	1.07407	1.05332	1
CYP2D9	0.721016	1.37213	0.961851	1
CYP2D10	0.31847	1.65605	1.84968	1
FGR	-0.676199	1.12455	1.15129	1
ZFP354B	-1.02114	1.61627	1.77514	1
PPIL6	-0.342565	1.08225	1.43733	1
ANO4	1.02447	1.34813	1.63829	1
DLX4OS	-0.360595	1.17963	1.04272	1
GLIS2	-0.662646	1.05972	1.23994	1
LIPK	-0.980065	1.60668	2.18036	1
TGFB3	-0.354743	1.30424	1.49929	1
OAS2	-0.371958	1.21872	-0.140624	1
RUNX1	-0.760342	1.0361	1.15469	1
PXMP2	-0.241827	1.19776	1.74753	1
OAS1B	-1.08143	1.44478	0.903596	1
SLC6A2	-0.0315906	1.5016	2.11927	1
FAM151B	-0.874752	1.00018	0.921093	1
RAP1GAP2	0.232246	1.24628	1.14478	1
ADIG	0.363017	1.33299	1.18309	1
PLSCR2	-0.829476	1.07598	0.953028	1
SLC43A2	-0.381995	1.09956	0.68623	1
GNG7	-0.891137	1.08267	1.16765	1
CXCL17	-0.612843	1.09545	1.41945	1
KCNJ2	-0.647504	1.14589	0.838958	1
COL9A3	-0.597807	1.1946	1.42041	1
CPE	-0.599879	1.19323	1.24897	1
B4GALNT3	-0.821047	1.40139	1.53496	1
CST3	-1.22444	1.27072	1.28903	1
SRPK3	-0.382549	1.46194	0.232922	1
MOGAT1	0.218744	1.42928	1.51842	1
COL16A1	-0.416375	1.01471	1.12263	1
EDAR	0.646014	1.30907	1.10613	1
EPS8L3	-0.780673	1.12828	1.12643	1
IL15	-0.692984	1.0752	1.26373	1
PDK4	-0.85714	1.48553	0.955624	1
NFATC2	-0.420332	1.07903	0.812577	1
FBLN7	-0.975604	1.61087	1.67435	1
SLFN8	-0.79092	1.05432	0.780692	1
VEPH1	-0.871861	1.60637	1.75585	1
1700029J07RIK	-0.605322	1.11976	0.778101	1
KCNE1	0.918882	1.49991	1.25647	1
AICDA	0	1.53514	0.53422	1
SCGB2B27	-1.49179	1.54902	1.51043	1
ISRAA	-1.07591	1.44006	1.07094	1
4930556M19RIK	-0.839228	1.05873	0.991439	1
2210407C18RIK	-0.469678	1.06656	1.18181	1
EDN2	-0.492808	1.27369	0.967389	1
AI463170	-0.826097	1.13103	1.39211	1
ARHGAP9	-1.02902	1.25064	1.37032	1
FN3K	-0.961419	1.16316	1.2491	1
COL25A1	-0.699159	1.25035	1.15796	1
VDR	-0.77758	0.9874	1.1227	1
RALGDS	-0.530389	0.951649	1.06164	1
GSTT3	-0.846023	0.984541	1.21842	1
DDO	-0.703242	0.944143	1.26875	1
ZBTB4	-0.741544	0.757721	1.02442	1
PDK2	-0.504263	0.773853	1.04557	1
TRIM2	0.0617961	0.702066	1.05364	1
AFAP1L2	-0.678521	0.637614	1.01648	1
ARHGAP42	0.105869	0.825363	1.02456	1
LMOD1	-0.821584	0.99396	1.05352	1
FZD9	0.280394	0.632727	1.43105	1
OSR1	0.66067	0.564134	1.3242	1
FRK	-0.683883	0.991229	1.19717	1
NEURL1A	1.0177	1.03466	1.83039	1
DIXDC1	-0.817211	0.794921	1.10402	1
NRBP2	-0.919248	0.937373	1.10038	1
ZFP608	-0.807831	0.979565	1.22983	1
CCDC8	-0.261237	0.973706	1.936	1
ESPN	-0.928347	0.94921	1.35209	1
PITPNC1	-0.664775	0.864646	1.07386	1
DBNDD2	0.0487911	0.880024	1.05879	1
PM20D1	-0.852401	0.998336	1.34315	1
NR4A2	-0.777326	0.957282	1.39415	1
6430573F11RIK	-0.093736	0.683824	1.09877	1
N4BP2L1	-0.790066	0.990835	1.04615	1
PLEKHS1	0.161502	0.802333	1.17882	1
SOX8	-0.478648	0.947176	1.34472	1
5930430L01RIK	-0.533597	0.941702	1.24813	1
TRIM68	-0.633592	0.944319	1.12308	1
RGS20	-0.736525	0.993761	1.12228	1
2310015A10RIK	-0.347953	0.836206	1.08034	1
ARL4A	-0.405459	0.84473	1.05614	1
SEC16B	-0.812414	1.01297	1.40063	1
GABRP	-0.630837	0.971185	1.25307	1
POLM	-0.421385	0.457181	1.00728	1
FNDC5	-0.123918	0.872682	1.39393	1
SMAD9	-1.1983	1.199	2.01912	1
2900005J15RIK	-0.340872	1.04506	1.49443	1
ADAMTS10	-0.996106	0.523109	1.03974	1
SYNE4	-0.898728	0.940274	1.02755	1
E130215H24RIK	-0.298572	0.852008	1.19267	1
TAS1R1	-0.684946	0.888265	1.29935	1
PPARGC1B	-0.0703323	0.578351	1.01542	1
NAPB	-0.897662	0.789164	1.16124	1
B4GALNT2	-1.15023	1.16504	1.78944	1
MTSS1L	-0.425716	0.986978	1.06574	1
IKZF2	-0.516666	0.493934	1.21739	1
KCTD7	-0.724931	0.950033	1.10424	1
THNSL1	-0.628381	0.251753	1.05235	1
RAB40B	-0.585014	0.773656	1.16027	1
PCDHB3	-0.842175	0.826926	1.05733	1
RGS11	-0.00209797	0.840148	1.5192	1
SOWAHA	-0.757116	0.955235	1.55677	1
RBBP8NL	-0.546235	0.572651	1.05009	1
CSDC2	-0.950669	1.43281	1.74079	1
CNGB1	-1.16942	1.05711	1.61651	1
2810403D21RIK	-0.63893	0.953923	1.08648	1
CXXC4	-0.544068	0.910399	1.21757	1
GRAMD2	-0.470266	0.996532	1.37654	1
P2RX7	-0.711859	0.892838	1.07856	1
EPHA7	-0.547505	0.851212	1.22031	1
OMD	0.222275	1.24136	1.47411	1
PRKG1	0.0477567	0.987879	1.06017	1
9530091C08RIK	-0.900819	1.26179	1.59697	1
SLC5A9	-0.0385217	0.661859	1.10261	1
9230104L09RIK	-0.129275	0.18278	1.42861	1
ACSS1	-0.0887012	0.713985	1.03171	1
WDR93	-1.26979	1.21765	1.46131	1
PLATR4	-0.0627611	0.802903	1.64168	1
KLHDC8B	-0.657802	0.86002	1.0903	1
CAR9	-0.506182	0.668078	1.18682	1
SYN3	-0.397446	0.683205	1.00546	1
SOX5	-0.647591	0.878222	1.06626	1
ZKSCAN4	-0.422066	0.534149	1.15809	1
CLEC7A	-1.05481	1.19245	1.54893	1
SLC46A2	-0.968462	1.39487	1.51231	1
PPARGC1A	-0.0689613	1.00858	1.10762	1
EFHC1	-0.807636	0.817207	1.09885	1
RBPJL	-0.905019	0.961125	1.37048	1
FAM71F2	-1.10731	1.40161	1.44945	1
TCFL5	-0.160909	0.56652	1.01929	1
FAM150B	0.0585366	0.716808	1.19812	1
KLHDC7A	-0.897948	0.856583	1.10625	1
1500026H17RIK	-1.26883	1.07758	1.29512	1
PDGFRA	0.0428876	0.609905	1.00199	1
1700003E16RIK	-0.0212535	0.775198	1.10727	1
B3GALT5	0.259631	0.6652	1.24944	1
FGFBP1	-0.680079	0.582066	1.23934	1
LGR6	-0.458072	1.05978	1.08932	1
CHGA	-0.319591	0.895651	1.42183	1
LYZ2	0.148936	-0.0616332	1.18553	1
5031426D15RIK	-0.682817	0.836797	1.4509	1
RRM2	2.9715	-2.73234	-2.27369	2
UBE2C	3.31151	-2.54751	-2.24496	2
MKI67	3.40809	-2.71304	-1.95217	2
2810417H13RIK	3.49706	-2.90683	-2.3256	2
UHRF1	3.31458	-2.7698	-2.17474	2
HMGCS2	1.92239	-1.9495	-1.82344	2
BIRC5	3.35565	-2.52617	-2.01538	2
CDK1	3.2658	-2.62859	-1.85737	2
ANLN	2.61181	-1.91255	-1.5777	2
STMN1	2.74591	-2.14204	-1.85554	2
TOP2A	2.97417	-2.52338	-1.86939	2
KIF2C	3.48999	-3.10175	-2.15458	2
KNSTRN	2.57808	-1.99595	-1.68585	2
EXO1	3.61226	-2.77255	-1.55678	2
MCM2	2.27922	-1.82906	-1.33416	2
BUB1	3.39027	-3.0179	-2.38313	2
KIF4	3.35627	-2.81703	-2.26266	2
PBK	3.13002	-2.37951	-2.11945	2
MYBL2	3.32668	-2.86858	-2.12254	2
NEK2	3.16414	-2.51266	-2.25418	2
IQGAP3	3.41092	-2.58158	-2.46681	2
KIF11	3.05767	-2.6017	-2.21439	2
TPX2	2.98595	-2.38952	-1.99629	2
CENPM	3.41004	-2.3656	-1.91763	2
HELLS	2.92865	-1.95832	-1.54742	2
SHCBP1	3.30788	-2.3298	-2.20242	2
CCNB2	2.91638	-2.25385	-1.57918	2
CDC20	2.63125	-2.07576	-1.60784	2
KIF23	2.7356	-2.3102	-1.89605	2
PRC1	2.61733	-2.11682	-1.7207	2
SPAG5	2.90548	-1.67827	-1.0828	2
SPC24	3.15355	-2.29837	-1.86852	2
ARHGAP11A	2.65368	-2.2043	-2.21697	2
AURKB	3.12938	-2.44692	-2.31364	2
ECT2	2.76057	-2.0288	-1.73565	2
HMMR	3.16587	-2.64628	-1.9247	2
NT5DC2	2.45966	-1.19372	-1.29008	2
CDC6	2.99135	-2.19098	-1.61592	2
ASPM	3.4062	-2.39624	-1.9391	2
NCAPH	2.36902	-1.90135	-1.57729	2
RAD51	2.78892	-1.95241	-1.98655	2
MEX3B	4.16833	-1.99294	-2.72525	2
MELK	3.19457	-2.54341	-2.21572	2
POLE	2.70369	-2.06636	-1.81347	2
CCNA2	2.25995	-2.00122	-1.72772	2
CDC45	2.5089	-2.04782	-1.54278	2
CCNB1	3.02195	-2.65387	-1.80665	2
NUSAP1	3.03464	-2.20728	-1.85756	2
TACC3	2.33285	-1.95773	-1.77833	2
CHAF1A	2.35848	-1.94564	-1.50026	2
ESPL1	3.34411	-2.7634	-2.76505	2
CDCA8	2.80693	-2.33083	-1.78884	2
KIF15	3.20812	-2.69086	-2.17022	2
CDCA3	2.8709	-2.41435	-2.09989	2
CDCA5	3.16043	-2.1684	-2.12354	2
FAM20C	2.73515	-2.0946	-2.15769	2
NUF2	2.97256	-2.3175	-1.97634	2
DNA2	3.77603	-2.27359	-1.97044	2
MCM10	3.23868	-2.54156	-2.23129	2
KIF22	2.94885	-2.08796	-1.84645	2
CD320	2.22534	-1.56629	-1.73463	2
NXPE3	2.9327	-2.59098	-2.98686	2
CHAF1B	2.09507	-2.00442	-1.63442	2
MCM5	2.47796	-1.85939	-1.54177	2
TICRR	3.41856	-2.56308	-1.63425	2
PLK1	3.039	-2.69015	-2.29564	2
KIF18B	3.22077	-2.88928	-2.32039	2
E2F8	3.08481	-2.20982	-2.48468	2
DTX4	2.08574	-1.699	-1.65161	2
NDC80	2.78683	-2.60039	-1.98677	2
PLAC8	3.61937	-3.58	-2.76062	2
GREB1	3.94484	-3.57457	-2.74471	2
SFTPD	3.71273	-3.34007	-3.07102	2
TNNC1	3.82505	-1.35017	-1.36031	2
STIL	3.14383	-2.6996	-2.16769	2
SPC25	2.40087	-1.8109	-1.79881	2
CASC5	3.04269	-2.54806	-1.639	2
GPX3	3.53906	-3.32457	-2.62111	2
PASK	2.68662	-2.08495	-1.24936	2
CENPF	2.82596	-2.55867	-1.70167	2
CLSPN	3.52082	-2.77634	-2.62284	2
RACGAP1	2.10962	-2.05438	-1.69836	2
9530014B07RIK	3.51211	-3.32465	-3.04403	2
CDC25C	3.13444	-2.67267	-2.00101	2
CHEK1	2.75075	-1.46778	-1.23492	2
DEFB1	3.64257	-3.55497	-2.68506	2
NCAPG	2.2503	-1.96998	-1.5436	2
FIGNL1	2.77029	-2.08445	-1.39725	2
SPRR2G	3.82186	-3.66322	-2.83772	2
CDCA2	2.91831	-2.04594	-1.3153	2
KNTC1	2.73078	-2.45665	-1.81982	2
FAM64A	2.95783	-2.28998	-1.84609	2
GINS1	2.52493	-1.91813	-1.66126	2
ESCO2	3.09099	-2.16765	-2.18093	2
BUB1B	2.71722	-2.2253	-1.77201	2
DDIT4L	3.03709	-2.64332	-2.35615	2
SCUBE2	3.8158	-3.58159	-3.10952	2
DLGAP5	2.70318	-2.62693	-1.85649	2
MCM6	2.13392	-1.73582	-1.30433	2
SKA3	2.62068	-2.1117	-1.66048	2
MASTL	2.46742	-2.48446	-1.48316	2
ALOX12E	2.71467	-1.86438	-1.70763	2
SGOL1	3.30744	-2.26633	-1.7783	2
9130409J20RIK	3.06302	-3.28109	-3.23325	2
PPA1	1.60032	-1.30572	-1.59839	2
MAD2L1	1.68144	-1.76713	-1.6312	2
DTL	2.505	-1.96688	-1.3437	2
APITD1	2.27057	-2.33363	-1.55411	2
BEX1	2.26446	-1.90442	-2.12921	2
CENPE	2.78978	-2.42182	-1.55729	2
PCSK6	2.03544	-1.97981	-1.90422	2
CNTNAP2	2.99905	-3.66047	-3.14832	2
OIP5	2.29976	-1.55349	-1.32948	2
ST6GAL1	2.01835	-1.64869	-1.67741	2
CBX2	2.36932	-1.59709	-1.37042	2
PROM2	2.64169	-3.6195	-3.24709	2
FOLR2	3.35296	-2.27985	-2.13487	2
CENPN	2.19915	-1.7	-1.55707	2
HSD11B2	3.47874	-2.94941	-3.24832	2
DIAPH3	2.58584	-1.81881	-1.49431	2
CXCL15	3.15933	-3.31729	-2.36317	2
RAD51AP1	2.14945	-1.7026	-1.60707	2
INCENP	1.82392	-1.46393	-1.34737	2
SLC29A4	2.05914	-1.74472	-1.47106	2
SKA1	2.90624	-2.56116	-1.99588	2
SAPCD2	3.05047	-2.38649	-1.85203	2
CEP55	2.40218	-2.00107	-1.7527	2
TK1	2.17225	-1.90422	-1.30092	2
BRIP1	2.42029	-1.6896	-1.50973	2
RECQL4	2.59411	-1.20139	-1.33521	2
TMEFF1	1.69754	-1.32275	-1.40983	2
CENPA	2.00302	-1.61687	-1.49028	2
ASIC2	3.21877	-3.36704	-2.39023	2
CENPH	2.28146	-1.91064	-1.36614	2
KCNIP3	2.82982	-2.86895	-2.75153	2
C1QTNF1	2.33499	-1.52183	-1.49577	2
KIF20B	1.93405	-1.71841	-1.36413	2
RSPO1	2.77625	-2.52787	-2.59089	2
D630045J12RIK	3.00004	-2.89727	-2.56323	2
IRF4	3.03289	-2.51307	-2.74876	2
SPRR2A3	3.47141	-3.31933	-2.08705	2
LRR1	3.16346	-2.25887	-1.81168	2
EPGN	2.6085	-3.05955	-2.84255	2
CTNS	2.39959	-2.22498	-2.33029	2
TNFRSF19	2.39259	-2.12711	-2.23574	2
PTPRV	2.31031	-2.06199	-1.80472	2
TTK	2.78569	-2.61304	-1.9546	2
AREG	2.7551	-3.44545	-3.18366	2
MAPK4	2.69395	-1.61913	-1.83186	2
FOXM1	1.73585	-1.69717	-1.49437	2
CTSE	2.63489	-2.85281	-2.80393	2
BDNF	2.65614	-2.8033	-2.73291	2
SHC2	2.97377	-2.81277	-2.52956	2
PHGDH	1.91131	-2.06215	-2.05189	2
ANKLE1	2.94122	-2.2614	-1.42308	2
SOX21	2.83859	-2.70079	-2.48249	2
CKAP2	2.00963	-2.31592	-1.33851	2
GM11747	2.31379	-1.39037	-1.47374	2
AXIN2	2.41743	-1.97573	-2.13685	2
ZWILCH	2.16759	-1.88766	-1.21198	2
BPIFC	3.24043	-2.48792	-2.6882	2
TMEM86A	2.66677	-2.98216	-2.50951	2
FCNA	3.31056	-3.04178	-2.68897	2
TMEM229A	2.50859	-1.76586	-1.53474	2
DISP2	3.35972	-3.15264	-1.72621	2
P4HA2	2.63414	-2.515	-2.12422	2
GM9513	3.14272	-3.00996	-2.18114	2
GJB6	2.37597	-2.06462	-2.28791	2
ALOX5AP	2.54749	-1.28096	-1.62187	2
NALCN	3.13864	-3.04499	-1.56632	2
COL6A1	2.4513	-2.44167	-2.51062	2
GDAP1L1	2.69782	-2.38908	-2.05512	2
ECM1	2.08933	-2.11828	-2.18496	2
RNF223	2.74971	-2.90002	-2.9696	2
NMU	3.2288	-3.02793	-2.81197	2
LRRC10B	2.85315	-3.19067	-2.4864	2
SERPINE2	2.32121	-2.1494	-1.90988	2
DSCC1	2.64568	-1.78708	-1.23848	2
CCNF	1.68277	-1.67522	-2.09904	2
NEIL3	2.6274	-2.37896	-1.92213	2
NKAIN1	2.84624	-2.56176	-2.35231	2
PLEKHG4	3.05579	-3.10702	-2.86557	2
CENPI	2.27123	-2.2389	-1.44595	2
GGA2	1.7526	-1.66255	-1.82492	2
GAD1	2.80051	-2.11649	-2.56087	2
LGI2	2.91356	-2.57462	-2.48778	2
PCP4	3.13244	-2.92951	-2.52437	2
SUSD4	1.95559	-1.72956	-1.50068	2
PRR32	2.95355	-2.80822	-2.86935	2
3830417A13RIK	2.87182	-2.95561	-2.67437	2
BRCA1	2.28694	-1.88582	-1.53091	2
WDR62	1.4369	-1.67607	-1.38507	2
CERS6	2.40168	-2.53808	-2.40005	2
DEPDC1A	2.81065	-2.4798	-1.66565	2
OLFML3	2.26292	-1.22718	-1.45728	2
ADAM8	2.82328	-2.90985	-2.78227	2
KIFC1	2.53855	-2.95315	-2.04668	2
TNXB	2.64829	-2.96063	-2.70872	2
MYRF	2.98004	-2.83212	-2.52364	2
TRAIP	2.16599	-1.77054	-1.02842	2
DDX11	1.73625	-1.84141	-1.34578	2
RAD54B	2.16742	-1.93728	-1.20635	2
TUBB4A	2.25246	-2.33722	-2.35122	2
2610524H06RIK	2.0088	-1.8202	-1.6408	2
E2F2	2.30709	-1.94238	-1.96389	2
BMP8B	2.90393	-2.81546	-2.90681	2
STRA6	2.62297	-2.54977	-2.50167	2
MYB	1.99613	-2.77911	-2.36191	2
SGSM3	1.69964	-1.563	-1.629	2
MCHR1	2.54117	-2.47499	-2.37188	2
CLCNKA	3.0481	-1.99574	-2.03738	2
BMP3	2.98303	-2.88653	-2.26043	2
GRM8	2.43914	-3.50789	-3.25867	2
KCNN3	2.7388	-2.34962	-2.29211	2
D730048I06RIK	3.1138	-2.85619	-1.78345	2
5430419D17RIK	3.0063	-2.81168	-2.20803	2
ETNK2	2.05684	-1.75388	-2.13304	2
ABHD2	1.74863	-1.76005	-1.75335	2
GTSE1	2.08929	-2.58053	-1.91049	2
ANGPTL7	3.00826	-2.78139	-2.10223	2
AUNIP	2.65074	-2.68911	-2.63584	2
TTC39C	1.83819	-1.40512	-1.56103	2
IL34	2.27269	-2.28339	-2.08726	2
FAM3B	2.84047	-2.76679	-2.65975	2
NET1	1.49644	-1.83824	-1.81553	2
SLFN9	1.93826	-1.75845	-1.16691	2
SKP2	1.80131	-1.4462	-1.67177	2
TIMP1	1.70978	-1.28836	-1.47597	2
NAPSA	2.39498	-2.08455	-2.49315	2
ALDH1L1	2.22293	-1.69037	-1.5882	2
NRK	2.84427	-2.44861	-2.00456	2
PMAIP1	2.12025	-1.94286	-2.04784	2
NIPAL1	2.04723	-2.13273	-2.77123	2
CCNE1	1.72912	-1.49142	-1.47469	2
CHTF18	1.47718	-1.65069	-1.51439	2
IL5RA	2.74675	-2.63421	-2.60344	2
PLA1A	2.22602	-1.98025	-2.40265	2
PITPNM2	1.62165	-1.59674	-1.48517	2
GOT1L1	2.77255	-2.61436	-2.38666	2
ADCY1	2.50122	-1.65862	-1.81294	2
PRR11	2.29855	-1.76023	-1.45468	2
MIS18BP1	2.26465	-2.00375	-1.8048	2
SLC44A4	2.29121	-2.68238	-2.17489	2
ATP7B	2.77977	-2.40499	-2.20865	2
COL6A2	2.04253	-2.08101	-2.40386	2
ALOX15	2.11021	-1.94322	-1.59561	2
CPEB1	2.77571	-2.57626	-2.46281	2
DPEP2	2.90371	-2.6878	-1.8294	2
SYN2	2.71003	-2.36962	-2.29599	2
NMNAT2	2.51768	-2.0603	-2.21631	2
TMED3	2.02967	-1.80789	-1.749	2
ERCC6L	1.68319	-1.98934	-1.38505	2
HCK	2.19898	-1.32427	-1.72341	2
CLDN6	2.33818	-3.05061	-2.36501	2
HIST1H2AE	2.21277	-2.23973	-1.75568	2
GM4847	2.94697	-2.66008	-2.56212	2
PLK4	1.55141	-1.61295	-1.46659	2
TROAP	2.42105	-2.45846	-0.852374	2
DBN1	2.01365	-1.85982	-1.94014	2
GALNT9	2.56945	-1.82117	-1.51703	2
SPRR2F	2.91589	-2.61615	-2.39753	2
ADRA1A	2.30911	-2.60837	-1.85035	2
SPINK2	2.90625	-2.65668	-2.61819	2
DEPDC1B	2.0438	-1.9462	-1.3378	2
SUOX	2.04591	-2.00635	-2.02919	2
PPP2R2C	2.67077	-2.53909	-2.29421	2
PREX1	1.58043	-1.67448	-1.80246	2
POC1A	1.30619	-1.6402	-1.06903	2
HIST1H2AK	2.28433	-2.05261	-1.65431	2
C1QTNF6	2.27992	-2.26116	-2.15125	2
PTPN5	2.76887	-2.48064	-2.38822	2
TNIP3	2.30313	-1.28025	-2.41586	2
PENK	2.69382	-2.54571	-2.39362	2
TPH1	2.66905	-2.60938	-2.0599	2
SPINK8	2.65976	-2.48952	-2.33059	2
AOC1	2.43731	-2.76565	-2.69736	2
FIGF	2.49712	-2.24712	-1.81288	2
H2-OB	2.27191	-1.92542	-2.02342	2
LOR	2.63951	-2.51273	-2.48276	2
LPCAT4	1.81971	-1.85409	-1.81112	2
CDKN3	2.07916	-1.86665	-1.67911	2
BMPR1B	2.13208	-2.83773	-2.56239	2
FAM178B	1.82039	-1.85015	-1.73721	2
PKHD1	2.6305	-2.53595	-2.50596	2
GPR20	2.55741	-2.22137	-1.88972	2
OLFM4	2.55393	-2.58827	-2.55597	2
TMPRSS6	2.70948	-2.63096	-1.71523	2
DGKI	2.10919	-2.48345	-2.19241	2
MYCBPAP	1.98148	-2.49312	-1.89529	2
ZBTB8B	1.98697	-1.73399	-1.73213	2
ESRRB	2.67582	-2.56037	-2.25785	2
DKK3	1.84015	-1.64674	-1.39117	2
ADH7	2.46436	-2.35406	-2.12613	2
CALCA	2.65851	-2.43266	-1.39883	2
B2M	1.54461	-1.53814	-1.79643	2
FBN2	1.62598	-1.44139	-1.48652	2
ANO9	1.15859	-2.06505	-1.55736	2
CFTR	2.61808	-2.4235	-1.4307	2
COL6A3	1.62372	-1.65841	-1.82388	2
POLQ	2.16478	-1.83275	-0.930955	2
KCNF1	2.45348	-2.7484	-2.23902	2
SIPA1L1	1.73676	-1.39967	-1.36206	2
GSG2	2.00003	-1.78542	-1.21747	2
GLI3	1.02744	-1.68612	-1.67791	2
GM32014	2.36398	-2.53887	-1.97762	2
BCL2L15	1.70582	-1.45664	-1.46011	2
METRN	1.6174	-1.39255	-1.68011	2
TGM2	1.48879	-1.58402	-1.70389	2
MYCL	1.75293	-1.72771	-1.27663	2
IL2RB	2.11752	-2.00737	-1.73504	2
TNFSF11	2.5592	-2.27109	-2.02347	2
RNF207	2.03412	-2.20822	-2.11849	2
SLC52A3	1.82151	-2.13382	-1.98509	2
IGFBP1	2.47151	-2.14151	-2.27319	2
PNMT	2.5006	-2.43201	-2.40771	2
TENM1	2.42099	-2.75525	-1.90957	2
PIEZO2	1.93411	-2.88198	-2.03599	2
GM12887	2.56429	-2.33479	-2.05366	2
AFAP1L1	1.63887	-1.56685	-1.61753	2
GALE	1.49714	-1.35144	-1.55073	2
1110032F04RIK	1.64833	-1.71895	-1.97533	2
RGS2	1.81811	-1.50331	-1.51674	2
SLC16A5	2.25945	-2.70289	-2.02472	2
AI464131	1.82477	-1.75562	-1.74407	2
PODXL	1.4303	-1.5467	-1.50936	2
HIST1H1B	2.12655	-2.39447	-2.22656	2
CYP4F18	2.38871	-2.35442	-2.08177	2
FMO9	2.46832	-2.26446	-2.23567	2
PDGFRL	1.71739	-2.07422	-1.92798	2
SOAT1	1.75124	-1.9313	-1.90356	2
FAM19A4	2.42497	-2.45214	-2.41563	2
AGTR1A	2.28605	-2.45099	-2.10742	2
SP6	1.95227	-1.33514	-1.8655	2
CTSR	2.35018	-2.31389	-0.549183	2
WFDC2	1.79442	-2.25684	-1.85948	2
AVPI1	1.5106	-1.43874	-1.51382	2
PLOD1	1.49738	-1.46233	-1.58621	2
GOLGA7B	1.81821	-2.56071	-2.53399	2
HIF3A	2.39712	-2.06147	-2.06531	2
ALDH1A7	2.15587	-1.96906	-1.98815	2
ACSL6	2.43784	-2.02007	-1.613	2
H2-DMA	1.4552	-1.60775	-1.71442	2
WFDC12	2.31659	-2.73821	-1.19193	2
IVL	2.3861	-2.27312	-1.24495	2
FAM90A1A	2.40881	-2.17508	-2.15815	2
SULT5A1	2.0799	-2.05966	-2.01781	2
SLCO2A1	1.39006	-1.41536	-1.87064	2
SLC38A1	1.36359	-2.25894	-2.33474	2
GOT1	1.56162	-1.79435	-1.68036	2
PDLIM2	1.45171	-1.86897	-1.85278	2
UPK3BL	2.40122	-2.12584	-1.52519	2
LRP2	1.80061	-1.86122	-1.88906	2
DHCR24	1.7128	-2.04894	-1.61077	2
GSN	1.34048	-1.72814	-2.12141	2
SLC5A5	2.06356	-2.48748	-2.2387	2
LRRC15	2.07932	-1.57826	-2.83828	2
GRHL3	1.68997	-1.95012	-2.09268	2
GLDC	2.06475	-1.95927	-0.946323	2
GM6792	2.25218	-2.06373	-2.03863	2
LCE6A	2.26508	-2.06528	-2.03699	2
VAV3	1.36247	-1.91614	-1.79309	2
GM11532	1.79159	-1.21039	-1.81681	2
STC2	1.51846	-2.77021	-2.63236	2
DMPK	1.56177	-1.66593	-1.9908	2
H2AFY2	1.5431	-2.02528	-1.43974	2
DUSP9	1.36029	-1.39919	-1.6863	2
CALM4	1.90317	-1.81937	-1.79943	2
PLS1	1.51152	-2.36789	-2.31496	2
EFCAB11	2.00763	-1.85561	-1.13402	2
ADCY3	1.13156	-1.5245	-1.66756	2
LOC105245869	2.03734	-2.30385	-2.06072	2
LPIN2	1.33899	-1.99289	-2.12413	2
1700019N19RIK	2.20792	-1.99529	-1.96311	2
CDK18	1.49788	-2.01609	-2.01238	2
IGSF9	1.37836	-1.89922	-1.87869	2
CTHRC1	1.67412	-1.92384	-1.74009	2
CELA1	1.79533	-1.31734	-1.34228	2
KRT77	2.13119	-1.83378	-1.29438	2
FGF12	1.55468	-2.4723	-2.67786	2
SLPI	1.85187	-1.97597	-1.44637	2
MSLN	2.01064	-1.50262	-1.60646	2
ABO	2.11529	-1.92688	-1.52227	2
PGR	1.44465	-2.94274	-2.10434	2
DCN	1.29873	-1.52137	-1.55693	2
SPOCK1	2.12226	-1.92496	-1.65111	2
FAM83E	1.94214	-1.67213	-1.74318	2
TCN2	1.21231	-1.45443	-1.49126	2
FXYD4	1.75908	-1.83997	-1.23424	2
P2RY4	2.04204	-1.57977	-1.83709	2
ARG2	1.29245	-1.89703	-1.93825	2
PIRT	2.09186	-1.89847	-1.74926	2
ACSBG1	1.38027	-2.01836	-1.60058	2
RUNDC3A	1.45336	-1.87264	-1.60305	2
HIST1H2BC	1.31999	-1.70252	-1.52965	2
MUM1L1	1.36755	-2.02378	-2.13529	2
ID3	1.19079	-1.68085	-1.57706	2
CERS3	1.85387	-1.62025	-1.99166	2
SBK2	1.74338	-1.7923	-2.35072	2
WNK4	1.5726	-1.66026	-1.57561	2
TMEM266	1.78326	-1.82236	-1.45914	2
KCNAB3	1.44322	-1.55938	-1.97566	2
CDH24	1.47708	-1.54774	-1.51691	2
SLC2A3	1.96946	-1.79781	-1.73887	2
WNT4	1.46665	-2.84189	-2.20161	2
TBC1D16	1.46224	-2.06044	-1.87722	2
SLCO1A6	1.98466	-1.78481	-1.99327	2
CCL20	1.5096	-1.57993	-1.6475	2
F830016B08RIK	1.30661	-1.37285	-1.63174	2
UPK2	1.56902	-2.93704	-2.47355	2
FAM46D	1.97712	-1.80571	-1.78433	2
MREG	1.3211	-1.33323	-1.70013	2
TMEM71	1.41628	-1.41839	-1.57808	2
TMPRSS4	1.3478	-1.8005	-1.92967	2
SLC35F3	1.73073	-2.29032	-2.03573	2
GM17727	1.90881	-1.74551	-1.72684	2
TMEM108	1.73353	-1.54825	-1.62205	2
RIPPLY3	1.38525	-1.61161	-1.75235	2
LDOC1	1.93198	-1.84256	-1.81211	2
FAAH	1.35019	-2.28128	-2.24662	2
CACNG4	1.51435	-1.76156	-1.90408	2
SVS2	1.91629	-1.73457	-1.58879	2
HS3ST6	1.4057	-2.70496	-2.57418	2
ARNT2	1.50003	-1.50385	-1.4945	2
CDO1	1.61584	-2.56758	-2.12522	2
FOXRED2	1.53544	-2.29075	-2.1593	2
MYH10	1.28425	-1.69348	-1.60093	2
MGAT5	1.3776	-1.63464	-1.5712	2
SLC13A1	1.87503	-1.75928	-1.33595	2
PHYH	1.15859	-1.71688	-1.5997	2
CYP3A57	1.40652	-2.42508	-2.27877	2
CTXN3	1.80118	-1.6529	-1.64025	2
TWIST2	1.75304	-1.41377	-1.48118	2
FAM69A	1.117	-1.58539	-1.56152	2
SPEF2	1.69218	-1.51381	-1.35688	2
VSTM2B	1.77284	-1.62334	-1.60942	2
KCNE2	1.78527	-1.54002	-1.40807	2
BB123696	1.79553	-1.62929	-1.60778	2
KBTBD6	1.68142	-1.15836	-1.49881	2
KIF5C	1.33129	-2.31092	-2.18565	2
IGSF9B	1.48241	-1.83175	-1.49685	2
FGF14	1.59498	-1.6566	-1.43268	2
EFNA3	1.54978	-1.37345	-1.63258	2
SPSB4	1.20873	-2.37184	-2.31374	2
IFLTD1	1.70286	-1.55855	-1.40643	2
MAS1	1.6864	-1.40433	-1.47413	2
RASGRF1	1.27494	-1.66698	-1.25636	2
GNG13	1.39882	-1.65482	-1.48077	2
ITGBL1	1.38025	-2.13915	-2.30857	2
SLCO4C1	1.65433	-1.34368	-1.55603	2
PCSK1	1.6563	-1.40378	-1.50097	2
CCDC162	1.24247	-2.06037	-2.07293	2
SAA3	1.61673	-1.50851	-1.59872	2
SLC25A35	1.18096	-1.54354	-1.48504	2
IDO1	1.57533	-1.72415	-1.81569	2
MTMR7	1.24335	-2.47058	-2.06886	2
CNTFR	1.18401	-1.96881	-1.79005	2
KCNH2	1.30763	-2.0023	-1.73601	2
FOXA1	1.08971	-2.49384	-2.37802	2
SLC7A2	0.822024	-2.37228	-2.21287	2
GIPC2	0.696282	-2.46787	-2.33966	2
DUSP10	0.987757	-2.24033	-2.23332	2
R3HDML	1.1709	-2.73758	-2.28195	2
CCDC92	0.915564	-2.22254	-2.16716	2
ADRB1	0.659783	-2.6963	-2.27349	2
SPRR1A	1.19354	-2.49762	-2.49709	2
NRXN3	1.08729	-2.50611	-1.75231	2
ATP6V1C2	0.877141	-1.96983	-2.43423	2
TBX3OS2	1.18647	-2.28984	-2.32049	2
TSPAN13	0.977456	-1.63414	-1.57199	2
B3GNT7	0.902069	-1.99986	-1.97847	2
CLCA1	0.858153	-2.27318	-2.22313	2
SYT7	1.01198	-1.94324	-1.80655	2
SNHG11	1.35237	-2.45553	-1.15672	2
BC030870	0.808465	-2.11094	-2.10385	2
ARG1	1.1264	-1.97648	-1.73119	2
CHSY3	0.859774	-2.05756	-2.15452	2
CELSR1	0.991271	-1.61888	-1.43855	2
REG3B	0.57145	-2.18818	-2.23089	2
RAB44	0.902022	-2.01287	-2.10014	2
FGD2	1.03761	-1.53637	-1.49101	2
ITGAL	1.26085	-1.69023	-1.56306	2
TRIM58	1.26243	-1.83284	-1.63667	2
SYT5	1.41748	-1.90036	-1.31272	2
ADARB2	1.28463	-1.87706	-1.17108	2
MFAP4	1.03174	-1.84553	-2.0931	2
SLC39A2	1.19435	-1.78578	-1.73832	2
UTF1	1.34163	-1.62298	-1.6207	2
1810063I02RIK	1.39586	-1.62372	-1.61283	2
RIMS2	1.04979	-1.61146	-1.35166	2
GPC2	1.10851	-1.44956	-1.65759	2
ALK	1.24208	-1.54677	-1.64596	2
TNMD	1.30533	-1.4877	-1.45434	2
LY6G6C	1.17269	-1.34991	-2.06682	2
AI414108	1.09556	-1.43499	-1.63258	2
AP3B2	1.19758	-1.40632	-1.52536	2
STAT5A	1.74474	0.0280221	0.275247	3
CDK4	1.40743	-0.731494	-0.704103	3
RCC2	1.28114	-0.416736	-0.440488	3
MRPL34	2.03864	-1.07627	-0.991147	3
PREP	1.05009	-0.627898	-0.471734	3
ACTL6A	1.27649	-0.817029	-0.801661	3
MCM3	2.00779	-1.59943	-1.16202	3
TUBB5	1.22568	-1.09767	-1.11575	3
THOP1	1.15704	-0.749559	-0.706371	3
4930427A07RIK	1.81414	-1.405	-1.22424	3
TFDP1	1.45177	-1.09951	-0.792243	3
ASF1B	2.04014	-1.55453	-1.19947	3
FASN	1.0555	-0.270177	-0.334018	3
TTC13	1.88996	-1.1122	-1.05241	3
NUP93	1.43405	-1.12013	-0.96674	3
TCF7	1.40184	-0.791291	-0.97965	3
NUDCD2	1.62989	-0.802293	-0.737515	3
DCTPP1	1.97089	-0.891917	-0.919252	3
SH3PXD2B	1.94412	-1.3536	-1.27718	3
MRPL18	1.01537	-0.700293	-0.606052	3
SMARCC1	1.02342	-0.87997	-0.65647	3
PEG3	1.71485	-0.877527	-0.603079	3
LIMD2	1.18651	-0.422965	-0.256562	3
ANKRD13B	1.97717	-1.36001	-1.05558	3
MCM7	1.74667	-1.23863	-0.982616	3
FAM111A	1.82231	-1.46128	-1.17707	3
CIB1	1.50617	-1.00155	-1.25631	3
D17H6S56E-5	2.00144	-1.58349	-1.03748	3
GMNN	1.98275	-1.47055	-1.29522	3
SBK1	2.09705	-1.49183	-1.3155	3
NRM	1.74056	-1.45095	-1.14342	3
CAD	1.68032	-1.186	-1.15066	3
TOPBP1	1.63555	-1.3471	-0.982676	3
ACOT1	1.86394	-1.14514	-1.26417	3
MCPH1	1.16748	-1.16847	-0.862187	3
WDHD1	1.66788	-1.34207	-0.681545	3
DHFR	1.76207	-1.39347	-1.09705	3
TCF19	2.0371	-1.35343	-1.03914	3
CDC7	2.16958	-1.39406	-1.36083	3
TUBG1	1.64867	-1.24709	-1.06545	3
NCAPD2	1.94459	-1.54796	-1.06634	3
MEX3A	1.86777	-0.777322	-0.842511	3
PTPRS	1.65401	-0.705727	-0.395756	3
ISYNA1	1.31788	0.323873	0.268781	3
AURKA	1.6072	-1.3816	-1.28036	3
SCD2	2.15698	-1.2764	-1.24771	3
CYP1B1	2.18244	-0.344896	-1.74276	3
TIA1	1.42432	-0.856617	-0.61188	3
SMC2	1.57302	-1.40122	-1.20145	3
SOX12	2.31268	-1.13027	-1.04132	3
RPA2	1.40556	-0.999647	-0.855396	3
RBP1	1.74649	-0.761278	-0.81593	3
CENPW	2.14544	-1.33051	-1.25473	3
DCAKD	1.22389	-0.585652	-0.417178	3
NMRAL1	1.39871	-1.28487	-0.88197	3
ABCB6	1.09362	-0.724392	-0.625011	3
POLE2	1.67364	-1.02781	-0.354818	3
HMGB3	1.2487	-1.07873	-0.970811	3
POLA2	1.2017	-0.883152	-0.651578	3
FAM171A2	1.58966	-0.761878	-0.598238	3
PSAT1	1.89921	-1.34199	-1.2055	3
G6PDX	1.89886	-1.29455	-1.27051	3
PPP1R14B	1.12448	-0.285895	-0.486819	3
UNG	1.63005	-1.25089	-1.01394	3
AK4	1.31987	-0.984657	-1.14167	3
PODXL2	1.96154	-1.18865	-1.01837	3
EMID1	1.34513	-0.961044	-0.549593	3
ZBTB8A	1.91917	-1.07917	-1.1792	3
ADGRL1	1.84621	-1.33195	-1.22717	3
E2F1	1.93756	-1.59355	-1.17226	3
DDX19B	1.05662	-0.0105397	-0.056953	3
ADGRE5	1.66768	-0.956704	-0.765176	3
NUDT5	1.07278	-0.804448	-0.778779	3
MRPL36	1.0024	-0.416445	-0.344783	3
CDC25A	1.16599	-0.868673	-0.641788	3
SYCE2	1.53203	-1.51152	-1.32695	3
GM14005	1.93452	-0.130179	-0.132819	3
F3	1.19292	0.208481	0.260445	3
MEMO1	1.27245	-0.912417	-1.15085	3
NINL	1.32857	-0.741338	-0.749492	3
NCAPD3	1.24558	-0.857387	-0.862975	3
CIT	1.56269	-1.25937	-1.24682	3
MAZ	1.03384	-0.300072	-0.333692	3
E2F7	1.21991	-1.20574	-1.01809	3
KIF20A	1.38437	-1.29528	-0.843755	3
ALG3	1.3591	-0.855419	-0.95808	3
TYMS	1.34965	-1.11236	-1.04725	3
PPIL1	1.14001	-0.634029	-0.693979	3
PKMYT1	1.45273	-1.15624	-0.942273	3
GM266	2.28953	-0.423641	-0.458169	3
GGT1	2.22047	-1.28686	-1.18415	3
PDXP	1.82186	-1.4781	-0.980165	3
SUV39H1	1.17805	-0.659481	-0.551821	3
ACADS	1.03833	-0.465998	-0.464452	3
NAPEPLD	1.76165	-0.648723	-0.659957	3
TIPIN	1.07437	-0.685559	-0.478955	3
PLEKHH1	1.22324	-1.15496	-1.10135	3
LIG1	1.44561	-1.51858	-1.17632	3
MRAS	1.40053	-0.248091	-0.506648	3
SERF1	1.11249	-0.374137	-0.315853	3
ACY1	1.08569	-0.818027	-0.566205	3
GINS2	1.38354	-1.20571	-0.768011	3
SHISA2	1.8755	-1.08587	-0.82045	3
TSFM	1.03764	-0.456176	-0.548735	3
CENPT	1.24009	-0.684347	-0.819909	3
ZBTB45	1.20187	-0.712453	-0.67369	3
SAP30	1.06328	-0.948225	-1.03905	3
SNRNP25	1.07014	-0.921649	-0.868848	3
PXDN	1.30801	-0.569402	-0.507048	3
CTXN1	2.21721	-1.26399	-1.1324	3
BORA	1.29832	-1.06692	-0.730747	3
EFNA4	1.75377	-0.917136	-0.748555	3
PRDX2	1.13494	-0.877218	-0.924923	3
ACTR3B	1.64347	-0.0801194	0.171904	3
ANXA3	1.41883	-1.20108	-1.24044	3
SHPK	1.50029	-0.823359	-0.622771	3
C330027C09RIK	1.67669	-1.45834	-1.11928	3
SGOL2A	1.96326	-1.61665	-1.03546	3
USF1	1.24808	-0.232802	-0.255225	3
NCS1	1.55439	-0.765797	-1.13305	3
DBF4	1.27037	-1.18141	-1.34436	3
DUSP22	1.3796	-0.790059	-0.780009	3
ULK4	2.06311	-1.37217	-1.04254	3
B3GLCT	1.04225	-0.318869	-0.472405	3
SRL	1.46684	-0.696059	-0.222021	3
CHADL	1.49686	-0.116416	0.182802	3
DUT	1.09344	-0.792272	-0.699719	3
CBS	2.23899	-1.4702	-0.720854	3
ING4	1.09785	-0.345983	-0.185399	3
SLC30A2	1.71442	-1.3266	-1.02355	3
SMC4	1.03416	-0.956413	-0.596415	3
ORC1	2.00191	-1.51482	-1.26426	3
MCM8	1.49963	-1.48682	-0.821094	3
GM15612	1.68016	-1.24351	-1.21216	3
NDC1	1.13126	-1.0698	-0.921904	3
RFC4	1.43219	-1.22235	-1.03496	3
DERA	1.02033	-0.727099	-0.655725	3
B4GALNT4	2.0831	-1.07505	-0.844377	3
CKAP2L	1.66566	-1.68433	-1.20169	3
MPI	1.48544	-1.35507	-1.2449	3
4930579G24RIK	1.2889	-1.08118	-1.0148	3
LMNB1	1.32634	-1.31042	-1.13203	3
TRIP13	1.72789	-1.17548	-0.87534	3
METTL7A1	1.76933	-1.42047	-1.22525	3
RBM20	1.83292	-1.12684	-0.942402	3
PEG3OS	1.5526	-0.984159	-0.500953	3
BTBD3	1.64958	-0.567107	-0.981497	3
LBH	1.2907	-1.25799	-1.31136	3
D8ERTD82E	1.66399	-1.09399	-1.04048	3
CLIP2	1.3254	-0.631548	-0.608327	3
GUSB	1.01102	-0.489524	-0.596083	3
RAD54L	1.32702	-1.48118	-1.33652	3
ENKD1	1.41143	-0.560346	-0.228873	3
BCL2A1B	1.96527	-1.17215	-1.51517	3
MCM4	1.18776	-1.1496	-0.77822	3
MMS22L	1.55377	-1.29431	-1.0336	3
ERP29	1.07208	-0.720224	-0.775629	3
GINS3	1.73893	-0.997411	-0.545154	3
IL1RN	2.20291	-0.658669	-1.62877	3
MAL	1.29883	-0.469899	-0.382765	3
ARHGAP24	2.23625	-1.20915	-0.923315	3
UBLCP1	1.0369	-0.363473	-0.119209	3
CXCL5	2.34581	-0.796133	-0.137267	3
WIPI1	1.00743	-0.104366	0.147611	3
IDE	1.12917	-0.98667	-0.767157	3
BST2	1.16092	-0.825417	-1.61866	3
MTHFD2	1.16828	-1.06491	-0.890277	3
LRRC75A	1.17725	-0.649715	-0.639835	3
DDX28	1.283	-1.1265	-1.3027	3
GFRA4	2.31315	-0.717382	-1.56215	3
KLK1B27	2.6408	0.315396	0.8182	3
MBNL3	1.03915	-0.675079	-0.19881	3
ADAMTS7	1.26447	-0.92553	-0.85765	3
CRYZ	1.2635	-0.574883	-0.322732	3
TNFRSF11B	2.11196	-0.535072	-1.87167	3
ENAH	1.32329	-0.674959	-0.409902	3
SEC61B	1.05386	-0.5108	-0.750104	3
ST6GALNAC2	1.46959	-1.04461	-0.676225	3
GALNT18	1.03261	-0.701465	-0.958289	3
SEMA3C	1.61499	-1.39178	-1.28145	3
FAT2	1.47419	-0.656414	-0.556163	3
PKNOX2	1.89215	-1.11599	-0.644269	3
YDJC	1.70704	-0.727923	-0.837384	3
TMPRSS11A	2.3791	-1.44553	-0.82178	3
RFC5	1.08893	-0.822282	-0.631077	3
MERTK	1.15048	-0.168022	-0.464594	3
TTYH3	1.05521	-0.795184	-1.10941	3
SYT8	1.94069	-1.15387	-1.21484	3
ERN1	1.42312	-1.06271	-1.46172	3
SOCS2	1.66231	-0.851901	-0.671464	3
NME4	1.65027	-0.6308	-0.507975	3
CHFR	1.25776	-0.953662	-0.810019	3
PARPBP	1.93368	-1.51255	-1.20969	3
NSL1	2.01748	-1.34662	-1.03456	3
SLC7A6	1.31202	-1.01831	-1.13535	3
PARD6G	1.58141	-1.36088	-1.34196	3
ZNRF3	1.07875	-0.750901	-0.752468	3
RRM1	1.05435	-1.01499	-0.851566	3
CBX5	1.02113	-0.886614	-0.737414	3
SLC6A9	1.21336	-0.900752	-0.878965	3
LOCKD	2.18032	-1.35855	-1.26817	3
RMI2	2.37177	-0.965773	-1.08705	3
CLDN10	1.14111	-0.426373	-0.214327	3
E2F3	1.11443	-0.657286	-0.418128	3
FDPS	1.03547	-0.400585	-0.398976	3
NCAPG2	1.39236	-1.34411	-0.948622	3
WASF1	1.47331	-1.03952	-1.01571	3
PPFIA3	1.97411	-1.47425	-1.30292	3
MBOAT2	1.18368	-0.846141	-0.615057	3
ARHGDIG	1.66074	0.212076	0.562951	3
PIGS	1.25131	-1.05262	-0.943682	3
FAM83D	1.30778	-1.21593	-1.08428	3
RBL1	1.07626	-0.948708	-0.761595	3
NGFR	2.27097	-0.219533	-0.740807	3
TONSL	1.1546	-1.09252	-0.617924	3
4933404O12RIK	1.11529	-0.879973	-0.737055	3
SPCS3	1.12407	-0.855188	-0.834383	3
TST	1.06592	-1.24755	-1.20316	3
TBC1D7	1.02839	-0.371895	0.0844961	3
SDHAF1	1.057	-0.623519	-0.366405	3
TACO1	1.29463	-0.349407	-0.286068	3
CDC25B	1.11975	-1.22628	-1.13817	3
ZFP518B	1.21057	-0.875246	-0.690409	3
FAM195A	1.02872	-0.0984567	-0.0712857	3
DCK	1.2205	-1.29148	-0.771111	3
PROL1	2.32516	-0.964604	-1.09941	3
CWH43	2.29975	0.119193	-0.268201	3
SUV420H2	1.07217	-0.724205	-0.468935	3
LAMC1	1.3133	-1.14479	-1.13083	3
FRMPD1	1.76335	-0.647241	-0.292825	3
2010204K13RIK	2.01877	-0.685854	-0.525471	3
RNF180	1.89713	-1.36039	-1.34092	3
BCAN	2.47062	-0.112697	-0.460466	3
YPEL1	1.29437	-0.795028	-0.76016	3
MVK	1.25438	-0.488466	-0.234745	3
1110038B12RIK	1.19808	-0.348086	-0.266529	3
ADA	1.23689	-1.31755	-1.2895	3
ARHGAP26	1.1024	-0.873253	-1.07102	3
KBTBD13	2.35929	-1.06919	-0.700185	3
FBXO5	1.54535	-1.20507	-0.991418	3
BICD1	1.49598	-1.33899	-1.18528	3
ALDH5A1	1.20432	-0.770736	-0.816358	3
NUAK1	1.27868	-1.02289	-0.774875	3
PRIM1	1.01173	-1.22075	-1.04513	3
NREP	1.3883	-1.00118	-0.767476	3
LACC1	1.23051	-1.00452	-1.06649	3
CENPP	1.24766	-1.27869	-0.652202	3
MFSD2A	1.23827	-1.17591	-1.18783	3
FABP5	1.37432	-0.839084	-0.951906	3
FANCA	1.07701	-0.831961	-0.715524	3
FZD2	1.16153	-0.544315	-0.672574	3
RFC3	1.0506	-0.713719	-0.689862	3
GLS2	1.18192	-1.46423	-0.888296	3
CHN1	1.06433	-1.27458	-1.08272	3
UCHL5	1.01606	-0.98257	-0.956618	3
CBX3	1.17448	-0.621459	-0.270499	3
ATF6B	1.0704	-0.71195	-0.680287	3
SLC2A9	1.47783	-0.230305	-0.323964	3
GNMT	1.76125	-0.841246	-1.17891	3
MAN2A2	1.23195	-1.06689	-1.10446	3
CD276	1.14588	-1.26089	-1.28103	3
DNPH1	1.19945	-0.478437	-0.554458	3
LAMA5	1.35478	-1.24421	-1.26248	3
GM10653	1.00498	-0.741746	-0.843359	3
BARD1	1.97929	-1.43636	-1.29	3
ARHGEF19	1.10655	-0.459355	-0.0321865	3
PAK3	1.43933	-1.14849	-1.4029	3
HYOU1	1.12503	-0.589005	-0.892166	3
ZFP41	1.29858	-0.699103	-0.329054	3
ICK	1.14673	-0.818837	-0.810018	3
ANKS6	1.87725	-1.31698	-1.08232	3
CENPK	1.20571	-1.09981	-0.752584	3
FANCD2	1.42403	-1.10228	-1.19239	3
BMP1	1.14395	-1.02548	-0.933459	3
TENM4	1.6556	-0.402914	-0.0469675	3
KLHL42	1.44824	-0.709562	-0.541947	3
STEAP3	1.09626	-0.0532262	-0.0985337	3
CCDC85C	1.33202	-0.738444	-0.540685	3
ZBTB7C	1.52673	-0.881352	-0.753481	3
SLC39A8	1.35139	-0.950257	-0.701488	3
UHRF1BP1	1.03162	-0.249576	-0.302782	3
LGALS7	1.3569	-1.12372	-1.09735	3
ZBTB12	1.54912	-0.0140872	-0.214402	3
STRIP2	1.76032	-0.574112	-0.574924	3
KLK1B21	2.17144	0.221684	-0.365294	3
TPMT	1.11678	-1.0619	-1.02141	3
DUS2	1.25505	-0.894515	-0.988966	3
ATAD5	1.29523	-0.935868	-0.161916	3
MB21D1	1.17195	-0.484665	-0.651185	3
CITED4	1.38246	0.10335	0.273163	3
DYNLT1A	1.01461	-0.622402	-0.64773	3
ABAT	1.03361	-0.85247	-1.0305	3
KRT23	1.24015	-0.981625	-0.738781	3
POLA1	1.07522	-1.05506	-0.805247	3
CISD3	1.09764	-1.06122	-1.08366	3
KCNN1	1.24222	-0.616243	-0.582938	3
INPPL1	1.04538	-1.31283	-1.12525	3
DUBR	1.10599	-0.770539	-0.91729	3
TTF2	1.02181	-0.517165	-0.376584	3
KCNE3	1.25888	-1.33659	-1.3062	3
CEP78	1.08096	-0.662844	-0.54696	3
PYCR1	1.12998	-0.557205	-0.309037	3
SCN4A	2.13133	-0.688806	-0.644059	3
DGKH	1.07475	-1.10896	-1.11591	3
RERG	1.36245	0.142241	0.398059	3
RCC1	1.0128	-0.635998	-0.71467	3
FOXO6	1.40503	-1.29037	-0.899011	3
ELDR	2.00247	-1.60545	-0.601574	3
B4GALT2	1.58981	-1.34322	-1.38528	3
ATAD2	1.02657	-0.986684	-0.643411	3
MVD	1.02542	-0.432475	-0.0915574	3
ADAM11	1.50216	-1.16587	-0.982528	3
FBXL19	1.23679	-0.819369	-0.656973	3
BC030867	1.35685	-1.04792	-0.721427	3
PDLIM4	1.1599	-1.01765	-1.14324	3
UBE2T	1.23732	-0.92633	-0.751106	3
SUSD1	1.23023	-1.34037	-1.39741	3
ARMCX2	1.07081	-1.16029	-1.28435	3
IKBKE	1.27889	-0.87026	-1.12993	3
RAPGEFL1	1.2081	-0.852022	-0.761816	3
SLC12A4	1.34755	-1.20579	-1.26974	3
MAP7D2	1.84314	-1.29525	-0.837742	3
ATP2A3	1.34893	-0.150903	-0.0558854	3
ACOX3	1.24935	-1.1163	-1.05343	3
ZFP367	1.39002	-1.24679	-1.03206	3
CHRD	1.84775	-1.4619	-1.21144	3
ABCC4	1.29643	-1.36347	-1.33693	3
BLM	1.28522	-0.951128	-0.35156	3
VANGL2	1.15884	-0.742085	-0.793536	3
CCL25	1.24075	-1.22841	-1.1169	3
CEP72	1.22053	-0.874933	-0.32245	3
ATP13A3	1.01869	-1.15382	-1.40123	3
PPP1R9A	1.2874	-0.206275	-0.286032	3
RAD51B	1.35273	0.145394	0.390674	3
CTR9	1.04033	-0.933964	-0.761954	3
ELL3	1.114	-0.626467	-0.510105	3
TUBG2	1.34474	-0.265492	-0.176937	3
ASPRV1	1.44438	-0.770653	-0.903092	3
RIN3	1.04268	-1.03877	-1.07764	3
SLC16A3	1.05073	-0.391028	-0.984869	3
2700099C18RIK	1.31222	-0.848643	-0.889184	3
ATG9B	1.15786	-1.10896	-1.11329	3
LECT1	1.58851	-1.3776	-1.22106	3
PDE4C	1.28483	-0.540335	-1.01571	3
PRKCQ	1.60856	-1.11062	-1.2218	3
G6PD2	1.6974	-1.4655	-0.813574	3
SAMD1	1.11733	-0.0308108	0.0509598	3
MGP	1.09653	-0.410318	-0.453242	3
RASSF8	1.06135	-1.17963	-1.51472	3
STRADB	1.01075	-0.408362	-0.282901	3
CPT2	1.11838	-0.671304	-0.658068	3
GPR155	1.27888	-1.26954	-1.16411	3
ZMAT3	1.32569	-1.32733	-1.03725	3
KIF14	1.75205	-1.66957	-1.15428	3
2810408I11RIK	1.50903	-1.22386	-1.40917	3
LMLN	1.01292	-0.37022	-0.377401	3
PORCN	1.1608	-1.31556	-1.23577	3
H1FX	1.51596	-0.892495	-0.596367	3
CILP	1.40513	-0.436568	-0.99799	3
RNFT2	1.69121	-0.285128	-0.934703	3
PPP1R1B	1.08005	-0.264035	0.0903188	3
PRRX2	1.63719	-0.512611	-0.94078	3
REV3L	1.08794	-1.14973	-0.762723	3
GDPD1	1.28164	-1.44479	-1.37199	3
CDH3	1.10797	-1.10987	-1.04804	3
SLC39A4	1.04233	-0.71275	-1.2183	3
LPAR3	1.28479	-1.14924	-0.956495	3
TPRG	1.84046	0.430111	0.666806	3
MCOLN2	1.65056	-1.56695	0.303606	3
PMCH	1.81725	-1.35724	-0.673929	3
LAMC2	1.03208	-1.08395	-1.00066	3
TTLL1	1.00856	-0.692271	-0.643548	3
CAMK2A	1.62933	-0.651273	-1.40165	3
TMEM255A	1.06709	-0.616576	-0.393742	3
BRCA2	1.17659	-0.821149	-0.242159	3
PHACTR1	1.0755	-1.29608	-1.42846	3
HIST3H2A	1.03024	-0.579369	-0.580773	3
5430416O09RIK	1.14724	0.281154	0.0883202	3
PIDD1	1.20876	-1.23002	-0.957075	3
ZFAND4	1.49443	-1.23295	-0.760608	3
ZDHHC12	1.07215	-0.657699	-0.640209	3
STK32A	1.83485	-1.70103	-0.949276	3
PHKA1	1.0065	-0.857005	-0.758909	3
FOXQ1	1.38601	-0.635094	-0.721913	3
ACBD7	1.8539	0.00138171	-0.750051	3
D630039A03RIK	1.18689	-1.33326	-1.27832	3
EMB	1.03714	-1.06042	-0.898772	3
LCTL	1.21233	-1.06414	-0.855271	3
DAGLA	1.06631	-0.719071	-0.799873	3
TMEM159	1.04831	-1.37124	-1.54141	3
PHF19	1.38171	-0.481188	-0.398757	3
EID2	1.22466	-1.10908	-1.26705	3
4931431C16RIK	1.09466	-1.00527	-0.95272	3
RCOR2	1.098	-0.66708	-0.285137	3
CITED1	-1.03769	-1.21644	-1.09309	3
GM38426	1.15132	-1.31866	-1.03422	3
MMEL1	1.79189	-1.09736	-0.610287	3
HIST1H3D	1.80273	-1.68884	-1.12963	3
CDH2	1.31716	-1.25816	-1.15978	3
CSPG5	1.40765	-1.04684	-1.58581	3
RAB37	1.67171	-0.475503	-1.3833	3
RTKN2	1.38001	-1.45023	-1.30129	3
NUDT17	1.00139	-0.931748	-1.13935	3
IL17RD	1.13693	-0.993731	-1.09149	3
SLC12A3	1.75143	0.227497	0.225299	3
1700003D09RIK	1.0554	-0.454436	0.248607	3
ABHD8	1.13977	-0.96846	-1.28248	3
RIMS3	1.33211	-1.00575	-0.662728	3
LEPR	1.25044	-1.17853	-1.56149	3
ZGRF1	1.08659	-0.606936	-0.462216	3
GLRB	1.00206	-0.759279	-0.747815	3
HPDL	1.33044	-1.30671	-1.01584	3
BMPER	1.41797	-1.00594	-1.36829	3
5430403N17RIK	1.6871	-0.276121	-0.690106	3
SLC9A5	1.10312	-0.63929	-0.458321	3
B4GALT5	1.16642	-0.680132	-1.34392	3
BCL2A1A	1.57953	-0.5478	-1.23331	3
2610318N02RIK	1.74333	-0.945473	-0.820301	3
ZFP810	1.14046	-0.833998	-0.776255	3
PIK3AP1	1.02691	0.138684	0.297431	3
TTC9	1.09374	-1.15393	-1.59248	3
LRP11	1.14438	-0.446391	-0.5251	3
CLDN4	-1.06474	-0.946994	-1.37921	3
1810041L15RIK	1.54061	-1.4554	-0.854837	3
SLC41A3	1.07246	-0.797132	-0.822514	3
MYLK2	1.47145	-1.19589	-1.17482	3
HIST1H2BG	1.42469	-1.03872	-0.339253	3
DEFB14	1.68968	-0.892291	-1.30871	3
PTGIS	1.58535	-0.580372	-0.428126	3
ATP8A2	1.34021	-0.875931	-1.066	3
SYNPO2L	1.66042	-1.62116	-1.06899	3
DCAF12L1	1.18366	-1.08783	-1.19758	3
CNIH2	1.32042	-1.27283	-1.29874	3
C2	1.07145	-1.13422	-1.74613	3
ENTPD8	1.65408	-1.29752	-1.07137	3
RHOF	1.28681	-1.03659	-1.28573	3
SYT9	1.35063	-0.864089	-0.713483	3
HIST1H2AC	1.41818	-0.555025	0.0566602	3
DSG1B	1.59548	-0.479529	-0.345862	3
CCDC116	1.36865	-0.460329	-0.122381	3
DLX5	1.3551	-0.307692	0.214652	3
CRABP1	1.62989	-1.4626	-0.797626	3
8430426J06RIK	1.55581	-1.50705	-0.791392	3
XKR5	1.39737	-1.5646	-0.317961	3
DEFB29	1.58691	-1.22615	-1.17481	3
TTYH2	1.18606	-0.210406	-0.85581	3
AGR2	1.58773	-1.35953	-1.33601	3
ZBTB3	1.1552	-0.484545	-0.673704	3
IFNL3	1.59296	-1.37013	-1.36322	3
CX3CR1	1.57691	-1.07935	-0.894755	3
HIST1H3I	1.55908	-0.840489	-1.09065	3
KLK1B8	1.58394	-1.36153	-0.801061	3
CALML3	1.39484	-0.757779	-0.374603	3
4932702P03RIK	1.09098	-0.658182	-0.730472	3
C2CD4A	1.45401	-0.746178	-0.788893	3
RNASE1	1.01833	0.307794	0.483222	3
BCL9	1.00564	-0.34388	-0.167782	3
DQX1	1.22443	-1.39443	-1.21747	3
RLTPR	1.31235	-1.04315	-0.49502	3
LY6F	1.54334	-1.17442	-1.29632	3
KIF7	1.0302	-0.544934	-0.822971	3
BEX4	1.02964	-0.753761	-0.691775	3
ADAMTS15	1.06431	-0.299886	-0.63041	3
FN1	1.07767	-0.491824	-0.966925	3
IL27	1.51688	-1.29949	-1.27269	3
GM4951	1.12224	-0.933386	-1.87356	3
P4HA3	1.33389	-0.112329	-0.868248	3
AHRR	1.50618	-0.168226	-0.933791	3
SMIM10L2A	1.18195	-1.18239	-1.04369	3
KIF27	1.14517	-1.44152	-1.21814	3
FYB	1.33148	-0.515371	-0.743815	3
5730420D15RIK	1.39832	-0.479523	-0.605308	3
COL26A1	1.32602	-1.457	-1.38165	3
TBX3	0.253989	-2.2405	-1.7621	3
TUBA8	0.484729	-2.03896	-2.13746	3
CAPN8	0.181676	-2.3553	-2.1412	3
CCDC71L	0.576165	-1.71677	-1.79324	3
ABCC8	0.115318	-2.34129	-2.24744	3
TMEM54	0.590602	-1.94349	-1.8283	3
DSC2	0.664998	-1.66333	-1.38041	3
GLUL	0.889228	-1.73716	-1.90143	3
PXYLP1	0.167351	-1.46107	-1.29103	3
CSN2	0.0680755	-1.98764	-2.64559	3
PRLR	0.635718	-2.09423	-1.77243	3
KRT7	0.885343	-1.85468	-1.88814	3
RELL1	0.623328	-1.16228	-1.18817	3
CACHD1	0.841163	-1.17807	-1.58075	3
TBC1D31	0.961497	-1.0576	-1.05532	3
HIST1H1C	0.745482	-1.73412	-1.49154	3
MBOAT1	0.605226	-1.52299	-1.47475	3
TMEM56	0.104275	-1.97282	-1.90068	3
MSX2	0.305189	-1.91046	-1.72837	3
XPR1	0.848522	-1.14522	-1.19775	3
[truncated: 261 more rows]
