# Supplementary material for: Progesterone receptor antagonists reverse stem cell expansion and the paracrine effectors of progesterone action in the mouse mammary gland
Source: Breast Cancer Res. 2021 Aug 3;23:78. doi: 10.1186/s13058-021-01455-2 (PMC8330021; doi:10.1186/s13058-021-01455-2)
Supplement: Supplementary file 12 — Additional file 12. Supplementary Table 6: Alternative splicing, EP, LP [file 13058_2021_1455_MOESM12_ESM.xlsx]

## Sheet: LP_All_Events
Alternative 5 prime Splice Site									Alternative 3 prime splice site									Skipped Exon									Retained Exon									Mutually Exclusive Exon
GeneID	geneSymbol	chr	strand	longExonStart_0base	longExonEnd	PValue	FDR		GeneID	geneSymbol	chr	strand	longExonStart_0base	longExonEnd	PValue	FDR		GeneID	geneSymbol	chr	strand	exonStart_0base	exonEnd	PValue	FDR		GeneID	geneSymbol	chr	strand	riExonStart_0base	riExonEnd	PValue	FDR		GeneID	geneSymbol	chr	strand	1stExonStart_0base	1stExonEnd	PValue	FDR
ENSMUSG00000057335	Cep170	chr1	-	176769232	176769870	1.66533e-15	3.68705e-12		ENSMUSG00000074794	Arrdc3	chr13	+	80891449	80891642	1.02141e-14	3.69953e-11		ENSMUSG00000074272	Ceacam1	chr7	-	25473797	25474052	0	0		ENSMUSG00000028809	Srrm1	chr4	-	135344498	135346857	4.92051e-13	1.41415e-09		ENSMUSG00000014959	Gorasp2	chr2	+	70672564	70672761	0	0
ENSMUSG00000057335	Cep170	chr1	-	176769232	176769870	3.4196e-12	3.78549e-09		ENSMUSG00000023150	Ivns1abp	chr1	+	151355166	151356236	6.21192e-12	1.12498e-08		ENSMUSG00000004207	Psap	chr10	+	60297536	60297545	0	0		ENSMUSG00000035215	Lsm7	chr10	-	80854617	80855193	4.04099e-12	5.8069e-09		ENSMUSG00000032294	Pkm	chr9	+	59675028	59675195	0	0
ENSMUSG00000026107	Nabp1	chr1	-	51477824	51478399	7.91174e-11	5.83886e-08		ENSMUSG00000027404	Snrpb	chr2	-	130172602	130173174	4.3204e-10	5.21617e-07		ENSMUSG00000022587	Ly6e	chr15	+	74955482	74955717	0	0		ENSMUSG00000029860	Zyx	chr6	+	42356161	42357433	7.90529e-11	7.57327e-08		ENSMUSG00000040774	Cept1	chr3	-	106512802	106512887	1.11022e-16	3.287e-13
ENSMUSG00000026107	Nabp1	chr1	-	51477721	51478399	3.7699e-10	2.08664e-07		ENSMUSG00000037552	Plekhg2	chr7	-	28370237	28371042	2.05482e-08	1.86064e-05		ENSMUSG00000022587	Ly6e	chr15	+	74955566	74955717	0	0		ENSMUSG00000026107	Nabp1	chr1	-	51477477	51478399	1.62941e-10	1.17073e-07		ENSMUSG00000015937	H2afy	chr13	-	56088251	56088342	1.34004e-13	2.97556e-10
ENSMUSG00000038828	Tmem214	chr5	+	30874850	30875886	6.80837e-09	3.01475e-06		ENSMUSG00000034327	Kctd9	chr14	+	67729223	67729409	3.90666e-08	2.82999e-05		ENSMUSG00000022587	Ly6e	chr15	+	74955607	74955717	0	0		ENSMUSG00000034211	Mrps17	chr5	+	129715683	129716866	4.77445e-10	2.74435e-07		ENSMUSG00000031565	Fgfr1	chr8	+	25563373	25563524	5.22027e-13	9.27329e-10
ENSMUSG00000026127	Imp4	chr1	+	34442909	34443104	4.82839e-08	1.78168e-05		ENSMUSG00000001017	Chtop	chr3	-	90506107	90507258	7.72356e-08	4.66246e-05		ENSMUSG00000006498	Ptbp1	chr10	+	79862013	79862047	0	0		ENSMUSG00000008855	Hdac5	chr11	-	102196538	102197436	2.22051e-09	1.06362e-06		ENSMUSG00000023150	Ivns1abp	chr1	+	151355166	151356236	5.0263e-11	7.4406e-08
ENSMUSG00000025354	Dnajc14	chr10	+	128805675	128805726	6.0512e-08	1.91391e-05		ENSMUSG00000111497	Gm38431	chr9	-	21073074	21075496	2.20134e-07	0.000113904		ENSMUSG00000025283	Sat1	chrX	-	155215120	155215230	0	0		ENSMUSG00000007038	Neu1	chr17	+	34932565	34934185	6.1882e-09	2.5407e-06		ENSMUSG00000034908	Sidt2	chr9	-	45946744	45946816	1.06611e-10	1.35275e-07
ENSMUSG00000037805	Rpl10a	chr17	+	28328966	28329280	1.13767e-07	2.51879e-05		ENSMUSG00000003099	Ppp5c	chr7	-	17008613	17009058	5.30424e-07	0.000240149		ENSMUSG00000015165	Hnrnpl	chr7	+	28817334	28817404	0	0		ENSMUSG00000030083	Abtb1	chr6	-	88840709	88840900	1.81297e-08	6.5131e-06		ENSMUSG00000064215	Ifi27	chr12	+	103437389	103437524	4.04115e-10	4.48669e-07
ENSMUSG00000030083	Abtb1	chr6	-	88840837	88840900	1.0257e-07	2.51879e-05		ENSMUSG00000022440	C1qtnf6	chr15	-	78523345	78525398	7.22797e-07	0.000290885		ENSMUSG00000014959	Gorasp2	chr2	+	70672564	70672761	0	0		ENSMUSG00000027333	Smox	chr2	+	131520094	131521171	5.9427e-08	1.8977e-05		ENSMUSG00000098950	Gm28036	chr2	-	156079338	156079464	5.53559e-10	5.46302e-07
ENSMUSG00000022864	D16Ertd472e	chr16	-	78576190	78576657	9.26612e-08	2.51879e-05		ENSMUSG00000038777	Sema6c	chr3	+	95167005	95168706	2.22054e-06	0.000804279		ENSMUSG00000032294	Pkm	chr9	+	59675028	59675195	0	0		ENSMUSG00000001017	Chtop	chr3	-	90506107	90507626	1.84679e-07	5.30766e-05		ENSMUSG00000021709	Erbin	chr13	-	103827906	103828023	1.52163e-09	1.35151e-06
ENSMUSG00000038828	Tmem214	chr5	+	30872686	30872904	2.47451e-07	4.98051e-05		ENSMUSG00000018659	Pnpo	chr11	-	96940015	96940955	4.54142e-06	0.00149537		ENSMUSG00000032294	Pkm	chr9	+	59675567	59675734	0	0		ENSMUSG00000036073	Galt	chr4	+	41756512	41756995	2.74227e-07	7.1648e-05		ENSMUSG00000021709	Erbin	chr13	-	103827906	103828023	6.4918e-09	5.24183e-06
ENSMUSG00000097039	Pvt1	chr15	+	62242173	62242301	8.87491e-07	0.000163742		ENSMUSG00000020328	Nudcd2	chr11	+	40736492	40736644	7.26294e-06	0.0019878		ENSMUSG00000037608	Bclaf1	chr10	+	20327163	20327391	0	0		ENSMUSG00000015697	Setdb1	chr3	-	95337148	95339032	6.30324e-07	0.000150963		ENSMUSG00000068877	Selenbp2	chr3	+	94696991	94697104	1.04916e-08	7.76553e-06
ENSMUSG00000028796	Phc2	chr4	+	128743353	128743556	1.90842e-06	0.00030272		ENSMUSG00000026135	Zfp142	chr1	-	74579324	74579927	7.6559e-06	0.0019878		ENSMUSG00000024589	Nedd4l	chr18	+	65167513	65167573	0	0		ENSMUSG00000009555	Cdk9	chr2	-	32709466	32709944	9.37014e-07	0.000192356		ENSMUSG00000040952	Rps19	chr7	+	24886106	24886187	3.05971e-08	2.09049e-05
ENSMUSG00000041763	Tpp2	chr1	+	43954576	43956299	1.91422e-06	0.00030272		ENSMUSG00000020472	Zkscan17	chr11	-	59503383	59503810	7.6834e-06	0.0019878		ENSMUSG00000031626	Sorbs2	chr8	+	45645760	45645852	0	0		ENSMUSG00000025484	Bet1l	chr7	-	140854764	140855165	9.18684e-07	0.000192356		ENSMUSG00000024589	Nedd4l	chr18	+	65167513	65167573	5.47687e-08	3.47468e-05
ENSMUSG00000041147	Brca2	chr5	+	150531683	150532402	2.37988e-06	0.000351271		ENSMUSG00000002105	Slc39a13	chr2	-	91065581	91065739	1.20797e-05	0.00273454		ENSMUSG00000074272	Ceacam1	chr7	-	25474519	25474804	3.33067e-16	1.0111e-12		ENSMUSG00000022536	Glyr1	chr16	-	5048749	5049857	1.40705e-06	0.00026959		ENSMUSG00000024589	Nedd4l	chr18	+	65167513	65167573	3.14749e-07	0.000186373
ENSMUSG00000024299	Adamts10	chr17	+	33538570	33538712	2.87608e-06	0.000397977		ENSMUSG00000039753	Fbxl5	chr5	-	43760706	43760855	1.14843e-05	0.00273454		ENSMUSG00000064215	Ifi27	chr12	+	103437389	103437524	1.33227e-15	3.79163e-12		ENSMUSG00000012114	Med15	chr16	-	17682274	17685504	1.53632e-06	0.000275962		ENSMUSG00000027523	Gnas	chr2	+	174336746	174336791	3.80156e-07	0.000211034
ENSMUSG00000052395	Rft1	chr14	+	30676849	30676907	4.8961e-06	0.000637645		ENSMUSG00000035021	Baz1a	chr12	-	54927563	54927713	1.30192e-05	0.00277385		ENSMUSG00000030605	Mfge8	chr7	-	79143277	79143388	1.9984e-15	5.35289e-12		ENSMUSG00000026269	Rnpepl1	chr1	+	92917146	92917746	2.48987e-06	0.000420934		ENSMUSG00000071172	Srsf3	chr17	+	29039453	29039909	4.06745e-07	0.000212512
ENSMUSG00000022770	Dlg1	chr16	+	31796865	31797010	7.05563e-06	0.000867843		ENSMUSG00000058291	Zfp68	chr5	-	138616469	138616565	1.60028e-05	0.0031309		ENSMUSG00000034101	Ctnnd1	chr2	-	84603187	84603274	2.88658e-15	7.30241e-12		ENSMUSG00000036291	Ap5m1	chr14	+	49073548	49074194	3.05278e-06	0.000487427		ENSMUSG00000038685	Rtel1	chr2	+	181355008	181355125	5.65016e-07	0.000250924
ENSMUSG00000031381	Piga	chrX	+	164422583	164423672	8.09051e-06	0.000942757		ENSMUSG00000017664	Slc35c2	chr2	-	165283248	165283603	1.64238e-05	0.0031309		ENSMUSG00000021709	Erbin	chr13	-	103830187	103830331	3.88578e-15	9.31278e-12		ENSMUSG00000022332	Khdrbs3	chr15	+	69092900	69094516	5.64365e-06	0.000853676		ENSMUSG00000031712	Il15	chr8	-	82343238	82343323	5.44154e-07	0.000250924
ENSMUSG00000029650	Slc46a3	chr5	-	147894480	147894815	1.30975e-05	0.00144989		ENSMUSG00000002944	Cd36	chr5	-	17828774	17828984	1.99144e-05	0.00360649		ENSMUSG00000003072	Atp5d	chr10	+	80145218	80145307	4.66294e-15	1.06166e-11		ENSMUSG00000038895	Zfp653	chr9	-	22057500	22058415	5.96151e-06	0.000856668		ENSMUSG00000028573	Fggy	chr4	+	95600964	95601116	5.46883e-07	0.000250924
ENSMUSG00000034175	Rhbdd3	chr11	+	5105180	5105347	1.51728e-05	0.00159965		ENSMUSG00000031478	Nek3	chr8	-	22132049	22132199	2.42027e-05	0.00417439		ENSMUSG00000018677	Slc25a39	chr11	-	102403632	102403713	3.31957e-14	7.19809e-11		ENSMUSG00000026754	Golga1	chr2	-	39047022	39047766	7.7295e-06	0.00100975		ENSMUSG00000035021	Baz1a	chr12	-	54923384	54923480	6.37246e-07	0.000269525
ENSMUSG00000031381	Piga	chrX	+	164422583	164423363	1.99529e-05	0.00200799		ENSMUSG00000020818	Mfsd11	chr11	+	116859298	116859378	2.68198e-05	0.00441551		ENSMUSG00000021171	Esyt2	chr12	+	116353826	116353889	6.29496e-14	1.30294e-10		ENSMUSG00000041477	Dcp1b	chr6	+	119214769	119217979	7.52185e-06	0.00100975		ENSMUSG00000044348	Slc25a53	chrX	-	137027989	137028154	1.56443e-06	0.000631604
ENSMUSG00000022906	Parp9	chr16	+	35943368	35943510	2.58607e-05	0.00248937		ENSMUSG00000044320	1700001O22Rik	chr2	-	30796108	30796283	2.83475e-05	0.00441567		ENSMUSG00000060373	Hnrnpc	chr14	-	52097321	52098544	6.78346e-14	1.34301e-10		ENSMUSG00000006169	Clint1	chr11	+	45906180	45910625	9.06225e-06	0.00113239		ENSMUSG00000022680	Pdxdc1	chr16	-	13859953	13860038	1.96545e-06	0.000759006
ENSMUSG00000040701	Ap1g2	chr14	-	55104581	55104927	2.95676e-05	0.00272761		ENSMUSG00000053158	Fes	chr7	-	80382312	80382431	2.9259e-05	0.00441567		ENSMUSG00000001123	Lgals9	chr11	-	78969713	78969806	1.09024e-13	2.06855e-10		ENSMUSG00000038518	Jarid2	chr13	+	44910536	44913286	9.63273e-06	0.00115352		ENSMUSG00000027523	Gnas	chr2	+	174336746	174336791	2.88636e-06	0.0010682
ENSMUSG00000027333	Smox	chr2	+	131520094	131521171	4.04365e-05	0.00358106		ENSMUSG00000037370	Enpp1	chr10	-	24664554	24664627	3.21705e-05	0.00466086		ENSMUSG00000033295	Ptprf	chr4	-	118227818	118227845	1.33338e-13	2.42867e-10		ENSMUSG00000049659	Aftph	chr11	-	20696750	20698373	1.66347e-05	0.00191232		ENSMUSG00000038685	Rtel1	chr2	+	181355008	181355125	3.03201e-06	0.00107721
ENSMUSG00000010097	Nxf1	chr19	+	8764921	8766833	5.1476e-05	0.00438338		ENSMUSG00000068551	Zfp467	chr6	-	48436612	48439454	3.41793e-05	0.00476144		ENSMUSG00000034908	Sidt2	chr9	-	45947628	45947697	1.70974e-13	2.99442e-10		ENSMUSG00000021134	Srsf5	chr12	+	80947795	80949168	2.0323e-05	0.00224647		ENSMUSG00000005087	Cd44	chr2	-	102842835	102842949	3.55932e-06	0.00121592
ENSMUSG00000024188	Luc7l	chr17	+	26252965	26254388	5.4113e-05	0.00443727		ENSMUSG00000036155	Mgat5	chr1	+	127306633	127307016	4.66907e-05	0.00563712		ENSMUSG00000023175	Bsg	chr10	+	79708696	79709044	1.84186e-13	3.10633e-10		ENSMUSG00000007411	Mark3	chr12	+	111628189	111629115	2.8844e-05	0.00307028		ENSMUSG00000005087	Cd44	chr2	-	102842835	102842949	3.74493e-06	0.00123194
ENSMUSG00000025762	Larp1b	chr3	+	40961607	40961788	7.01132e-05	0.00554395		ENSMUSG00000018433	Nol11	chr11	-	107173209	107173461	4.54083e-05	0.00563712		ENSMUSG00000040407	Akap9	chr5	+	3954396	3954450	2.77667e-13	4.51566e-10		ENSMUSG00000004455	Ppp1cc	chr5	+	122174054	122175273	3.2226e-05	0.00323678		ENSMUSG00000074272	Ceacam1	chr7	-	25471797	25472073	5.86023e-06	0.00169534
ENSMUSG00000022570	Tsta3	chr15	-	75926742	75926872	9.85758e-05	0.00752575		ENSMUSG00000019470	Xab2	chr8	-	3613158	3613499	4.5832e-05	0.00563712		ENSMUSG00000022587	Ly6e	chr15	+	74955482	74955717	4.80282e-13	7.54143e-10		ENSMUSG00000029389	Ddx55	chr5	+	124554670	124556848	3.26606e-05	0.00323678		ENSMUSG00000023026	Dip2b	chr15	+	100206396	100206454	5.91707e-06	0.00169534
ENSMUSG00000041890	Git2	chr5	-	114743730	114743880	0.000109687	0.00758896		ENSMUSG00000052337	Immt	chr6	+	71852729	71852867	4.56931e-05	0.00563712		ENSMUSG00000022139	Mbnl2	chr14	+	120403335	120403371	5.20139e-13	7.89502e-10		ENSMUSG00000034771	Tle2	chr10	+	81580256	81580667	4.31559e-05	0.00400097		ENSMUSG00000030852	Tacc2	chr7	+	130621720	130626841	5.4597e-06	0.00169534
ENSMUSG00000036073	Galt	chr4	+	41756512	41756811	0.00010877	0.00758896		ENSMUSG00000028382	Ptbp3	chr4	-	59485606	59485746	5.02707e-05	0.00587357		ENSMUSG00000040774	Cept1	chr3	-	106520008	106520093	9.13714e-13	1.34216e-09		ENSMUSG00000020329	Polrmt	chr10	-	79738030	79738804	4.2443e-05	0.00400097		ENSMUSG00000027366	Sppl2a	chr2	-	126912642	126912745	5.70819e-06	0.00169534
ENSMUSG00000029335	Bmp3	chr5	+	98872029	98873007	0.000105762	0.00758896		ENSMUSG00000038685	Rtel1	chr2	+	181355309	181355552	5.26395e-05	0.00595814		ENSMUSG00000031565	Fgfr1	chr8	+	25563373	25563524	1.04361e-12	1.48506e-09		ENSMUSG00000042099	Kank3	chr17	+	33822285	33822917	4.70813e-05	0.00422849		ENSMUSG00000028760	Eif4g3	chr4	+	138084256	138084370	7.16978e-06	0.00199006
ENSMUSG00000021693	Kif2a	chr13	-	106987952	106988075	0.000156248	0.0104237		ENSMUSG00000058291	Zfp68	chr5	-	138616469	138616614	6.3613e-05	0.00677665		ENSMUSG00000015937	H2afy	chr13	-	56088251	56088342	1.86273e-12	2.57034e-09		ENSMUSG00000000738	Spg7	chr8	+	123079413	123080810	6.288e-05	0.00547628		ENSMUSG00000035934	Pknox2	chr9	-	36923583	36923772	1.20447e-05	0.00324184
ENSMUSG00000021068	Nin	chr12	-	70025379	70025481	0.000160075	0.0104237		ENSMUSG00000026708	Cenpl	chr1	+	161078228	161078480	6.19356e-05	0.00677665		ENSMUSG00000057335	Cep170	chr1	-	176769232	176769526	5.05906e-12	6.77558e-09		ENSMUSG00000027610	Gss	chr2	-	155566802	155567887	6.66139e-05	0.00563084		ENSMUSG00000027333	Smox	chr2	+	131520411	131521171	1.46452e-05	0.00382584
ENSMUSG00000037022	Mmaa	chr8	-	79281176	79281654	0.000191193	0.0120943		ENSMUSG00000006732	Mettl1	chr10	+	127044996	127045127	8.02308e-05	0.00830274		ENSMUSG00000040952	Rps19	chr7	+	24886106	24886187	7.38587e-12	9.60923e-09		ENSMUSG00000031570	Plpp5	chr8	+	25721661	25722600	9.56445e-05	0.00785378		ENSMUSG00000031608	Galnt7	chr8	-	57542511	57542694	1.52945e-05	0.00388131
ENSMUSG00000074129	Rpl13a	chr7	-	45128541	45128735	0.000232584	0.0135364		ENSMUSG00000022433	Csnk1e	chr15	-	79438771	79438859	8.65336e-05	0.00870624		ENSMUSG00000020733	Slc9a3r1	chr11	+	115177223	115177377	1.15838e-11	1.46523e-08		ENSMUSG00000032085	Tagln	chr9	-	45930832	45931477	0.000101611	0.00811195		ENSMUSG00000027523	Gnas	chr2	+	174334211	174334284	1.66174e-05	0.00409988
ENSMUSG00000031156	Slc35a2	chrX	+	7892139	7893415	0.000229294	0.0135364		ENSMUSG00000032803	Cdv3	chr9	-	103353103	103356029	9.72827e-05	0.00952319		ENSMUSG00000000303	Cdh1	chr8	+	106604286	106604407	1.24367e-11	1.51876e-08		ENSMUSG00000032525	Nktr	chr9	+	121727315	121729680	0.00010645	0.0082686		ENSMUSG00000026150	Mff	chr1	+	82741817	82741976	1.89779e-05	0.00455571
ENSMUSG00000026349	Ccnt2	chr1	+	127797840	127798196	0.000238447	0.0135364		ENSMUSG00000029705	Cux1	chr5	-	136312642	136313314	0.00010132	0.00965737		ENSMUSG00000029810	Tmem176b	chr6	-	48840360	48840453	1.26741e-11	1.51876e-08		ENSMUSG00000005481	Ddx39	chr8	+	83721733	83722361	0.000158016	0.011951		ENSMUSG00000005087	Cd44	chr2	-	102842260	102842377	2.50121e-05	0.00584624
ENSMUSG00000029290	Zfp326	chr5	+	105886316	105888839	0.000237283	0.0135364		ENSMUSG00000031833	Mast3	chr8	-	70789847	70789920	0.000126091	0.0117103		ENSMUSG00000034908	Sidt2	chr9	-	45947835	45947888	1.81054e-11	2.11397e-08		ENSMUSG00000004788	Eif2b2	chr12	+	85219821	85220245	0.000172195	0.0126894		ENSMUSG00000021709	Erbin	chr13	-	103824719	103824926	2.92717e-05	0.00666643
ENSMUSG00000011257	Pabpc4	chr4	+	123295201	123295321	0.000261121	0.014453		ENSMUSG00000035021	Baz1a	chr12	-	54927563	54927710	0.000137053	0.0124102		ENSMUSG00000049606	Zfp644	chr5	-	106695136	106695699	2.92679e-11	3.33186e-08		ENSMUSG00000021428	Riok1	chr13	+	38043908	38045315	0.000188346	0.0133982		ENSMUSG00000034584	Exph5	chr9	+	53353153	53353202	4.81096e-05	0.0106827
ENSMUSG00000020079	Supv3l1	chr10	-	62443378	62443563	0.000293936	0.0158725		ENSMUSG00000022536	Glyr1	chr16	-	5021337	5021448	0.000146647	0.0125166		ENSMUSG00000028760	Eif4g3	chr4	+	138084256	138084370	3.01391e-11	3.34735e-08		ENSMUSG00000022443	Myh9	chr15	-	77791047	77791779	0.000191137	0.0133982		ENSMUSG00000022094	Slc39a14	chr14	-	70313600	70313770	5.12241e-05	0.0110969
ENSMUSG00000066892	Fbxl12	chr9	-	20642203	20644298	0.000303378	0.0159923		ENSMUSG00000003316	Glg1	chr8	-	111160620	111160810	0.000148596	0.0125166		ENSMUSG00000049606	Zfp644	chr5	-	106695642	106695699	5.16068e-11	5.59516e-08		ENSMUSG00000001305	Rrp15	chr1	-	186737587	186739863	0.000198806	0.0134326		ENSMUSG00000022892	App	chr16	-	84965669	84965770	6.57099e-05	0.0138961
ENSMUSG00000028651	Ppie	chr4	-	123136800	123136898	0.000328908	0.0165172		ENSMUSG00000000600	Krit1	chr5	+	3806418	3806568	0.00014807	0.0125166		ENSMUSG00000098950	Gm28036	chr2	-	156096417	156098372	1.67606e-10	1.77491e-07		ENSMUSG00000038828	Tmem214	chr5	+	30872686	30873144	0.000200974	0.0134326		ENSMUSG00000034707	Gns	chr10	+	121388100	121388202	6.81325e-05	0.0140733
ENSMUSG00000038828	Tmem214	chr5	+	30874850	30875886	0.000335715	0.0165172		ENSMUSG00000037266	Rsrp1	chr4	+	134926025	134926818	0.000162013	0.0133366		ENSMUSG00000033060	Lmo7	chr14	+	101888676	101888706	2.45701e-10	2.54278e-07		ENSMUSG00000029650	Slc46a3	chr5	-	147894480	147894815	0.000316248	0.0200713		ENSMUSG00000041757	Plekha6	chr1	+	133274792	133274879	7.79813e-05	0.0157416
ENSMUSG00000014504	Srp19	chr18	+	34331749	34334364	0.000327564	0.0165172		ENSMUSG00000001441	Npepps	chr11	-	97236064	97236221	0.000180823	0.0145543		ENSMUSG00000054008	Ndst1	chr18	-	60691928	60692099	2.67223e-10	2.70406e-07		ENSMUSG00000037266	Rsrp1	chr4	+	134925292	134926818	0.000321253	0.0200713		ENSMUSG00000021709	Erbin	chr13	-	103824719	103824848	9.6353e-05	0.0182087
ENSMUSG00000062270	Morf4l1	chr9	-	90097371	90100523	0.000353137	0.016635		ENSMUSG00000032178	Ilf3	chr9	+	21397968	21399250	0.000236655	0.0168168		ENSMUSG00000020358	Hnrnpab	chr11	-	51601749	51601890	3.12755e-10	3.096e-07		ENSMUSG00000022800	Fyttd1	chr16	+	32898373	32898939	0.00031082	0.0200713		ENSMUSG00000030166	Rad52	chr6	+	119914169	119914237	9.54931e-05	0.0182087
ENSMUSG00000049482	Ctu2	chr8	+	122478892	122479412	0.000349682	0.016635		ENSMUSG00000039852	Rere	chr4	+	150619000	150619205	0.000236791	0.0168168		ENSMUSG00000001123	Lgals9	chr11	-	78969713	78969803	4.63016e-10	4.48593e-07		ENSMUSG00000036459	Wtip	chr7	-	34118936	34119206	0.000348808	0.0213292		ENSMUSG00000064210	Ano6	chr15	+	95912304	95912370	9.50412e-05	0.0182087
ENSMUSG00000042744	Hectd4	chr5	+	121292729	121292858	0.000394989	0.0182189		ENSMUSG00000029599	Ddx54	chr5	+	120620257	120620758	0.000218299	0.0168168		ENSMUSG00000043962	Thrap3	chr4	-	126184930	126185142	5.39816e-10	5.12106e-07		ENSMUSG00000040746	Rnf167	chr11	+	70649674	70650017	0.000393263	0.0235466		ENSMUSG00000020456	Ogdh	chr11	+	6316764	6316855	0.000105394	0.0190262
ENSMUSG00000042772	Smg7	chr1	-	152848595	152849016	0.000420815	0.0186337		ENSMUSG00000025728	Pigq	chr17	-	25931673	25932231	0.000229536	0.0168168		ENSMUSG00000116953	9030025P20Rik	chr17	+	14982888	14983034	1.82347e-09	1.69457e-06		ENSMUSG00000037112	Sik2	chr9	-	50892800	50894081	0.000439832	0.0243092		ENSMUSG00000040025	Ythdf2	chr4	-	132210751	132210831	0.000107027	0.0190262
ENSMUSG00000027405	Nop56	chr2	+	130277031	130277314	0.000412968	0.0186337		ENSMUSG00000022338	Eny2	chr15	+	44433853	44433973	0.000225435	0.0168168		ENSMUSG00000049606	Zfp644	chr5	-	106690670	106690877	3.12739e-09	2.82136e-06		ENSMUSG00000037112	Sik2	chr9	-	50892800	50895961	0.000439244	0.0243092		ENSMUSG00000022307	Oxr1	chr15	+	41825889	41826052	0.000107105	0.0190262
ENSMUSG00000020260	Pofut2	chr10	+	77265835	77266032	0.000457434	0.019858		ENSMUSG00000030330	Ing4	chr6	+	125047792	125047940	0.000220071	0.0168168		ENSMUSG00000027806	Tsc22d2	chr3	+	58437316	58437475	3.22186e-09	2.82136e-06		ENSMUSG00000038900	Rpl12	chr2	+	32962984	32963853	0.000439187	0.0243092		ENSMUSG00000026313	Hdac4	chr1	-	91947417	91947536	0.000114042	0.0198612
ENSMUSG00000007411	Mark3	chr12	+	111628189	111629115	0.00046679	0.0198745		ENSMUSG00000090841	Myl6	chr10	-	128492228	128492535	0.000253316	0.0176444		ENSMUSG00000060373	Hnrnpc	chr14	-	52098014	52098544	3.17107e-09	2.82136e-06		ENSMUSG00000025372	Baiap2	chr11	+	120000551	120002621	0.00042194	0.0243092		ENSMUSG00000021709	Erbin	chr13	-	103824719	103824848	0.000124504	0.0212662
ENSMUSG00000066894	Vsig10	chr5	+	117334767	117335067	0.000478317	0.019981		ENSMUSG00000003299	Mrpl4	chr9	+	21007327	21007540	0.000259334	0.0177228		ENSMUSG00000034908	Sidt2	chr9	-	45948214	45948308	3.46441e-09	2.97652e-06		ENSMUSG00000000134	Tfe3	chrX	+	7766554	7767684	0.000488701	0.0265005		ENSMUSG00000031078	Cttn	chr7	-	144450977	144451088	0.000132725	0.0222427
ENSMUSG00000028289	Epha7	chr4	+	28938595	28938779	0.000491001	0.020131		ENSMUSG00000038685	Rtel1	chr2	+	181355309	181355552	0.000302308	0.0188786		ENSMUSG00000030697	Ppp4c	chr7	-	126788116	126788218	3.61312e-09	3.0468e-06		ENSMUSG00000063659	Zbtb18	chr1	+	177447088	177450764	0.000509972	0.0271418		ENSMUSG00000046434	Hnrnpa1	chr15	+	103242921	103243080	0.000152337	0.0250566
ENSMUSG00000028101	Pias3	chr3	+	96703525	96703659	0.000537229	0.0216259		ENSMUSG00000034707	Gns	chr10	+	121378021	121378189	0.000293064	0.0188786		ENSMUSG00000042305	Tmem183a	chr1	-	134352974	134353137	4.52294e-09	3.74467e-06		ENSMUSG00000003545	Fosb	chr7	-	19302701	19305302	0.000545765	0.0285187		ENSMUSG00000030557	Mef2a	chr7	-	67268066	67268204	0.000155781	0.0251572
ENSMUSG00000025237	Parp6	chr9	+	59641023	59641810	0.000566956	0.022415		ENSMUSG00000041264	Uspl1	chr5	+	149193839	149194440	0.000289973	0.0188786		ENSMUSG00000000631	Myo18a	chr11	+	77854677	77854722	4.84976e-09	3.94354e-06		ENSMUSG00000045482	Trrap	chr5	+	144784257	144785565	0.000563989	0.0289447		ENSMUSG00000021709	Erbin	chr13	-	103824719	103824926	0.000159581	0.0253107
ENSMUSG00000025980	Hspd1	chr1	-	55087988	55088243	0.000709309	0.0275511		ENSMUSG00000032525	Nktr	chr9	+	121742564	121742787	0.000283038	0.0188786		ENSMUSG00000030516	Tjp1	chr7	-	65314092	65314332	5.75758e-09	4.5996e-06		ENSMUSG00000040472	Rabggta	chr14	-	55719090	55719345	0.000599731	0.0302391		ENSMUSG00000024780	Cdc37l1	chr19	+	29012787	29012910	0.000162687	0.0253507
ENSMUSG00000042790	Rnf214	chr9	-	45899745	45900256	0.000723957	0.0276352		ENSMUSG00000001228	Uhrf1	chr17	+	56313040	56313251	0.000300665	0.0188786		ENSMUSG00000021868	Ppif	chr14	+	25697572	25697669	6.1428e-09	4.80307e-06		ENSMUSG00000047098	Rnf31	chr14	+	55594922	55596255	0.000613386	0.0303943		ENSMUSG00000030447	Cyfip1	chr7	+	55897824	55897972	0.000182883	0.0280063
ENSMUSG00000053453	Thoc7	chr14	-	13957459	13957631	0.000747369	0.0280453		ENSMUSG00000037339	Fam53a	chr5	-	33600355	33608227	0.000308312	0.0189272		ENSMUSG00000043909	Trp53bp1	chr2	-	121228021	121228162	6.22324e-09	4.80307e-06		ENSMUSG00000017428	Psmd11	chr11	+	80469801	80470418	0.000743598	0.0360851		ENSMUSG00000031967	Afg3l1	chr8	+	123493827	123493935	0.000190254	0.0286414
ENSMUSG00000025377	Tepsin	chr11	-	120096564	120096674	0.000771933	0.0284843		ENSMUSG00000021532	Fastkd3	chr13	+	68589222	68589389	0.000333175	0.0201127		ENSMUSG00000029810	Tmem176b	chr6	-	48840360	48840453	6.89178e-09	5.2304e-06		ENSMUSG00000031256	Cstf2	chrX	+	134069844	134073277	0.000753343	0.0360851		ENSMUSG00000023018	Smarcd1	chr15	+	99704330	99704453	0.000194081	0.0287304
ENSMUSG00000079179	Rab10os	chr12	+	3235525	3237412	0.000894668	0.0324721		ENSMUSG00000030330	Ing4	chr6	+	125047478	125047587	0.000367101	0.0217974		ENSMUSG00000022680	Pdxdc1	chr16	-	13858856	13858958	7.53241e-09	5.62288e-06		ENSMUSG00000029068	Ccnl2	chr4	+	155817922	155820428	0.000889223	0.0390778		ENSMUSG00000098950	Gm28036	chr2	-	156096417	156098372	0.000203586	0.0296435
ENSMUSG00000021288	Klc1	chr12	+	111789324	111789486	0.00103824	0.0370394		ENSMUSG00000029638	Glcci1	chr6	+	8573181	8573298	0.000378397	0.0221057		ENSMUSG00000020516	Rps6kb1	chr11	-	86516743	86516987	7.65999e-09	5.62589e-06		ENSMUSG00000033540	Idua	chr5	+	108680110	108680497	0.000844647	0.0390778		ENSMUSG00000035476	Tab3	chrX	+	85575549	85575610	0.000218643	0.0313224
ENSMUSG00000034771	Tle2	chr10	+	81580256	81580331	0.00105397	0.0370394		ENSMUSG00000036304	Zdhhc23	chr16	-	43971398	43971566	0.000408368	0.0234779		ENSMUSG00000035382	Pcsk7	chr9	+	45927036	45927118	8.12864e-09	5.87533e-06		ENSMUSG00000010608	Rbm25	chr12	+	83660594	83664259	0.000911	0.0390778		ENSMUSG00000035382	Pcsk7	chr9	+	45926733	45926828	0.000244917	0.0345294
ENSMUSG00000034858	Fam214a	chr9	+	75023584	75023746	0.00112875	0.0390478		ENSMUSG00000020654	Adcy3	chr12	+	4208576	4208661	0.000426395	0.0241313		ENSMUSG00000022680	Pdxdc1	chr16	-	13859109	13859158	9.29802e-09	6.61554e-06		ENSMUSG00000028689	Ccdc163	chr4	+	116709239	116709619	0.000847936	0.0390778		ENSMUSG00000026767	Mindy3	chr2	-	12405859	12405920	0.000272681	0.0378431
ENSMUSG00000068329	Htra2	chr6	-	83052697	83053070	0.00118622	0.0398824		ENSMUSG00000027333	Smox	chr2	+	131516197	131516443	0.000444864	0.0247892		ENSMUSG00000032035	Ets1	chr9	+	32730054	32730255	1.14937e-08	8.05193e-06		ENSMUSG00000029089	5730480H06Rik	chr5	+	48372328	48374247	0.000863069	0.0390778		ENSMUSG00000059401	Mamld1	chrX	+	71121357	71121468	0.000282369	0.0385847
ENSMUSG00000057894	Zfp329	chr7	-	12809696	12811666	0.00118891	0.0398824		ENSMUSG00000026201	Stk16	chr1	+	75213112	75213228	0.000547349	0.0300379		ENSMUSG00000025529	Zfp711	chrX	+	112627169	112627304	1.32898e-08	9.16916e-06		ENSMUSG00000020863	Luc7l3	chr11	-	94291138	94293278	0.000899071	0.0390778		ENSMUSG00000047213	Ythdf3	chr3	+	16186966	16187115	0.000291716	0.0392284
ENSMUSG00000039768	Dnajc11	chr4	+	151968498	151970930	0.00124205	0.0410433		ENSMUSG00000014668	Chfr	chr5	+	110140353	110140453	0.000576275	0.0311532		ENSMUSG00000042719	Naa25	chr5	+	121429332	121429461	1.37815e-08	9.36649e-06		ENSMUSG00000033916	Chmp2a	chr7	-	13032434	13032821	0.000906967	0.0390778		ENSMUSG00000019979	Apaf1	chr10	-	91079479	91079636	0.000295914	0.0392284
ENSMUSG00000034211	Mrps17	chr5	+	129715683	129715941	0.00136004	0.0442812		ENSMUSG00000021901	Bap1	chr14	+	31257288	31257767	0.000594898	0.0313642		ENSMUSG00000006154	Eps8l1	chr7	+	4469880	4470042	2.00334e-08	1.32469e-05		ENSMUSG00000022999	Lmbr1l	chr15	-	98908519	98908759	0.000933071	0.039436		ENSMUSG00000029810	Tmem176b	chr6	-	48835444	48835675	0.000311094	0.0406343
ENSMUSG00000023805	Synj2	chr17	+	6007937	6008110	0.00141773	0.0454905		ENSMUSG00000002289	Angptl4	chr17	-	33780529	33780647	0.000606155	0.0313642		ENSMUSG00000032599	Ip6k2	chr9	+	108796670	108796783	2.00728e-08	1.32469e-05		ENSMUSG00000056962	Jmjd6	chr11	-	116839837	116840545	0.000999999	0.0410571		ENSMUSG00000021432	Slc35b3	chr13	-	38944499	38944654	0.00033766	0.0434652
ENSMUSG00000069631	Strada	chr11	-	106187100	106187180	0.00144262	0.045628		ENSMUSG00000028655	Mfsd2a	chr4	-	122959269	122959401	0.000604416	0.0313642		ENSMUSG00000032294	Pkm	chr9	+	59675567	59675734	2.48122e-08	1.61407e-05		ENSMUSG00000024807	Syvn1	chr19	+	6048454	6048743	0.00099805	0.0410571		ENSMUSG00000040929	Rfx3	chr19	-	27806792	27806908	0.000348637	0.0442371
ENSMUSG00000042625	Safb2	chr17	-	56578636	56578844	0.00168005	0.0523892		ENSMUSG00000026466	Tor1aip1	chr1	-	156018217	156018530	0.000635489	0.0315307		ENSMUSG00000002496	Tsc2	chr17	-	24601388	24601457	2.6558e-08	1.7033e-05		ENSMUSG00000047909	Ankrd16	chr2	+	11781476	11783756	0.00125322	0.050729		ENSMUSG00000020733	Slc9a3r1	chr11	+	115177223	115177377	0.000368152	0.0460553
ENSMUSG00000024856	Cdk2ap2	chr19	+	4097400	4097733	0.00179837	0.0552998		ENSMUSG00000071533	Pcnp	chr16	-	56024223	56024438	0.00062754	0.0315307		ENSMUSG00000032599	Ip6k2	chr9	+	108796654	108796783	2.90512e-08	1.83732e-05		ENSMUSG00000070003	Ssbp4	chr8	-	70598992	70599163	0.00135678	0.0541583		ENSMUSG00000032525	Nktr	chr9	+	121728577	121728685	0.000397529	0.0490396
ENSMUSG00000037816	Fbxw17	chr13	+	50432170	50432346	0.00185416	0.0554744		ENSMUSG00000025872	Thoc3	chr13	-	54466179	54466455	0.000630803	0.0315307		ENSMUSG00000004897	Hdgf	chr3	+	87913840	87913910	3.16956e-08	1.97711e-05		ENSMUSG00000031508	Ankrd10	chr8	-	11611582	11615910	0.00143468	0.0564831		ENSMUSG00000022607	Ptk2	chr15	-	73343132	73343359	0.000407848	0.0491975
ENSMUSG00000022570	Tsta3	chr15	-	75926289	75926457	0.00183298	0.0554744		ENSMUSG00000036819	Jmjd4	chr11	+	59453827	59454059	0.000679178	0.0327998		ENSMUSG00000027523	Gnas	chr2	+	174336746	174336791	3.38672e-08	2.08402e-05		ENSMUSG00000090077	Lime1	chr2	+	181382486	181382703	0.0014867	0.0570528		ENSMUSG00000028977	Casz1	chr4	+	148901704	148901743	0.000409887	0.0491975
ENSMUSG00000032407	U2surp	chr9	-	95491264	95491300	0.00209547	0.0612775		ENSMUSG00000021240	Abcd4	chr12	-	84612324	84612896	0.000671667	0.0327998		ENSMUSG00000034341	Wbp2	chr11	-	116081231	116081324	3.65732e-08	2.22053e-05		ENSMUSG00000097195	Snhg5	chr9	-	88521917	88522381	0.0015087	0.0570528		ENSMUSG00000001054	Rmnd5b	chr11	-	51627879	51628025	0.000479807	0.0553125
ENSMUSG00000097145	9230114K14Rik	chr5	+	52192917	52193596	0.00212822	0.0612775		ENSMUSG00000039458	Mtmr12	chr15	+	12266606	12266768	0.000691968	0.0329777		ENSMUSG00000040774	Cept1	chr3	-	106512802	106512887	4.08854e-08	2.44968e-05		ENSMUSG00000021901	Bap1	chr14	+	31256660	31257767	0.0014894	0.0570528		ENSMUSG00000026305	Lrrfip1	chr1	+	91084945	91085005	0.000480415	0.0553125
ENSMUSG00000006335	Tfpt	chr7	-	3620746	3620983	0.00213115	0.0612775		ENSMUSG00000063808	Gpatch1	chr7	-	35308178	35308339	0.000742929	0.0349466		ENSMUSG00000045983	Eif4g1	chr16	+	20674227	20674314	4.16445e-08	2.46276e-05		ENSMUSG00000023960	Enpp5	chr17	+	44082743	44086567	0.00183872	0.0686294		ENSMUSG00000029672	Fam3c	chr6	-	22329578	22329608	0.000474075	0.0553125
ENSMUSG00000038780	Smurf1	chr5	-	144880624	144881819	0.00223727	0.063254		ENSMUSG00000040272	Accs	chr2	-	93847916	93848189	0.000811253	0.0376713		ENSMUSG00000040025	Ythdf2	chr4	-	132205513	132205715	4.68102e-08	2.73275e-05		ENSMUSG00000001065	Zfp276	chr8	+	123264815	123265070	0.00188777	0.0695572		ENSMUSG00000087380	2210408F21Rik	chr6	+	31285002	31285120	0.000485743	0.0553125
ENSMUSG00000027660	Skil	chr3	+	31113407	31113640	0.00225703	0.063254		ENSMUSG00000041540	Sox5	chr6	-	143960796	143960920	0.00084153	0.0385826		ENSMUSG00000040025	Ythdf2	chr4	-	132204131	132205715	5.60848e-08	3.23276e-05		ENSMUSG00000039483	Asb6	chr2	-	30824640	30825560	0.00211422	0.076915		ENSMUSG00000038831	Ralgps1	chr2	-	33158909	33159036	0.000497543	0.055939
ENSMUSG00000095253	Zfp799	chr17	-	32822067	32822200	0.00231715	0.0641272		ENSMUSG00000002981	Clptm1	chr7	-	19634055	19635013	0.000970023	0.0428466		ENSMUSG00000057335	Cep170	chr1	-	176769232	176769526	5.78539e-08	3.29304e-05		ENSMUSG00000047617	Paxx	chr2	-	25460008	25460357	0.00231298	0.0820679		ENSMUSG00000022708	Zbtb20	chr16	+	43302568	43302615	0.00051422	0.0570912
ENSMUSG00000046711	Hmga1	chr17	+	27556667	27557066	0.00240531	0.0649435		ENSMUSG00000038773	Kdm3b	chr18	+	34794449	34795780	0.00096991	0.0428466		ENSMUSG00000020173	Cobl	chr11	-	12266855	12267144	6.2281e-08	3.50127e-05		ENSMUSG00000059208	Hnrnpm	chr17	-	33666493	33666685	0.00228846	0.0820679		ENSMUSG00000025237	Parp6	chr9	+	59639763	59639812	0.000525934	0.057671
ENSMUSG00000030815	Phkg2	chr7	+	127577534	127578029	0.00237891	0.0649435		ENSMUSG00000031691	Tnpo2	chr8	+	85038334	85038489	0.000970005	0.0428466		ENSMUSG00000030189	Ybx3	chr6	-	131367764	131367863	7.19166e-08	3.99365e-05		ENSMUSG00000022550	Adck5	chr15	+	76594528	76594752	0.00249944	0.0876023		ENSMUSG00000044348	Slc25a53	chrX	-	137027989	137028154	0.000541283	0.0586302
ENSMUSG00000053332	Gas5	chr1	+	161035982	161036244	0.00264071	0.07044		ENSMUSG00000023345	Poc1a	chr9	+	106329872	106330016	0.00105377	0.0454376		ENSMUSG00000018076	Med13l	chr5	+	118730911	118731017	7.88918e-08	4.30134e-05		ENSMUSG00000016664	Pacsin2	chr15	-	83401866	83401999	0.00262144	0.0896906		ENSMUSG00000032812	Arap1	chr7	+	101384861	101385040	0.000570388	0.0610384
ENSMUSG00000003778	Brd8	chr18	-	34608417	34609949	0.00324561	0.0855449		ENSMUSG00000066800	Rnasel	chr1	+	153753606	153755213	0.00105165	0.0454376		ENSMUSG00000006392	Med8	chr4	+	118410886	118411003	7.93465e-08	4.30134e-05		ENSMUSG00000026399	Cd55	chr1	-	130448327	130449563	0.00261389	0.0896906		ENSMUSG00000042790	Rnf214	chr9	-	45899745	45900256	0.000588407	0.062217
ENSMUSG00000045795	Whamm	chr7	+	81574545	81574719	0.00343613	0.0895011		ENSMUSG00000001415	Smg5	chr3	+	88349110	88349267	0.00116112	0.0488974		ENSMUSG00000020532	Acaca	chr11	+	84290287	84290311	9.41396e-08	5.04322e-05		ENSMUSG00000027002	Nckap1	chr2	-	80553136	80553449	0.00266076	0.0899649		ENSMUSG00000026393	Nek7	chr1	-	138544202	138544343	0.000608381	0.0635722
ENSMUSG00000032525	Nktr	chr9	+	121738387	121740075	0.00359713	0.0921918		ENSMUSG00000039137	Whrn	chr4	-	63429085	63429417	0.00116203	0.0488974		ENSMUSG00000055436	Srsf11	chr3	-	158023242	158023359	9.94021e-08	5.24175e-05		ENSMUSG00000037003	Tns2	chr15	+	102115560	102115766	0.00278821	0.0931781		ENSMUSG00000005087	Cd44	chr2	-	102839357	102839477	0.000622313	0.0642719
ENSMUSG00000021767	Kat6b	chr14	+	21624832	21625215	0.00362271	0.0921918		ENSMUSG00000031256	Cstf2	chrX	+	134073135	134073277	0.00117927	0.0488974		ENSMUSG00000026821	Ralgds	chr2	+	28543553	28543747	1.00148e-07	5.24175e-05		ENSMUSG00000038619	Ensa	chr3	+	95628540	95632102	0.00288447	0.0938465		ENSMUSG00000022607	Ptk2	chr15	-	73360025	73360337	0.000671236	0.0685277
ENSMUSG00000109324	Prmt1	chr7	-	44983770	44984133	0.00393224	0.0956701		ENSMUSG00000025409	Mbd6	chr10	-	127283024	127283162	0.00118801	0.0488974		ENSMUSG00000022884	Eif4a2	chr16	+	23112350	23112457	1.02912e-07	5.32523e-05		ENSMUSG00000002948	Map2k7	chr8	+	4245694	4247897	0.00285829	0.0938465		ENSMUSG00000029924	Slc37a3	chr6	-	39367643	39367766	0.000764289	0.0754268
ENSMUSG00000025504	Eps8l2	chr7	+	141341892	141342110	0.00389633	0.0956701		ENSMUSG00000022338	Eny2	chr15	+	44433853	44433973	0.00120718	0.049128		ENSMUSG00000078700	D030028A08Rik	chr11	+	96958852	96959024	1.12346e-07	5.74806e-05		ENSMUSG00000026034	Clk1	chr1	-	58417012	58417383	0.00290617	0.0938465		ENSMUSG00000027247	Arhgap1	chr2	+	91662297	91662385	0.000753416	0.0754268
ENSMUSG00000021432	Slc35b3	chr13	-	38955648	38955936	0.00380941	0.0956701		ENSMUSG00000053158	Fes	chr7	-	80382312	80382431	0.00124625	0.0501547		ENSMUSG00000042423	Fbrs	chr7	+	127486859	127486889	1.17561e-07	5.94804e-05		ENSMUSG00000031939	Taf1d	chr9	+	15306872	15307821	0.00298374	0.0938744		ENSMUSG00000111497	Gm38431	chr9	-	21073074	21073181	0.000763541	0.0754268
ENSMUSG00000000148	Brat1	chr5	+	140712504	140712901	0.00387646	0.0956701		ENSMUSG00000038866	Zcchc2	chr1	+	106027387	106027531	0.00130071	0.0517712		ENSMUSG00000023460	Rab12	chr17	-	66504988	66505178	1.39864e-07	6.99876e-05		ENSMUSG00000026927	Sdccag3	chr2	-	26385497	26386063	0.00300503	0.0938744		ENSMUSG00000039607	Rbms3	chr9	-	116586017	116586095	0.000782545	0.0761138
									ENSMUSG00000061393	Acvr2b	chr9	+	119428200	119428568	0.00135063	0.0531736		ENSMUSG00000006498	Ptbp1	chr10	+	79860116	79860194	1.44225e-07	7.13851e-05		ENSMUSG00000012076	Brms1l	chr12	+	55868161	55869736	0.00297669	0.0938744		ENSMUSG00000034269	Setd5	chr6	+	113105664	113105761	0.000796958	0.0761138
									ENSMUSG00000021282	Eif5	chr12	+	111539407	111539687	0.00161673	0.0629655		ENSMUSG00000029687	Ezh2	chr6	-	47546748	47546830	1.47867e-07	7.24008e-05		ENSMUSG00000039768	Dnajc11	chr4	+	151977998	151979586	0.00313248	0.0957739		ENSMUSG00000033373	Fntb	chr12	+	76773257	76773393	0.000791355	0.0761138
									ENSMUSG00000063445	Nmral1	chr16	-	4711316	4711680	0.00179624	0.0689056		ENSMUSG00000021709	Erbin	chr13	-	103830187	103830331	1.52697e-07	7.39704e-05		ENSMUSG00000001248	Gramd1a	chr7	-	31134413	31135739	0.00312111	0.0957739		ENSMUSG00000079179	Rab10os	chr12	+	3241521	3241578	0.000817108	0.077208
									ENSMUSG00000028943	Espn	chr4	-	152130768	152131294	0.0018073	0.0689056		ENSMUSG00000043962	Thrap3	chr4	-	126173136	126173329	1.59073e-07	7.60464e-05		ENSMUSG00000020692	Nle1	chr11	-	82902994	82904136	0.00319427	0.0966351		ENSMUSG00000023984	Gm20517	chr17	+	47674715	47674920	0.00084758	0.0786418
									ENSMUSG00000031712	Il15	chr8	-	82334468	82334606	0.00184544	0.0696268		ENSMUSG00000042870	Tom1	chr8	+	75047992	75048077	1.60323e-07	7.60464e-05		ENSMUSG00000060601	Nr1h2	chr7	-	44553578	44553923	0.00340564	0.101956		ENSMUSG00000041831	Sytl3	chr17	+	6702879	6702958	0.00084999	0.0786418
									ENSMUSG00000028464	Tpm2	chr4	-	43514710	43516003	0.00190073	0.0696671		ENSMUSG00000010608	Rbm25	chr12	+	83642401	83642519	1.70355e-07	7.99722e-05		ENSMUSG00000004561	Mettl17	chr14	+	51885150	51885522	0.00344217	0.101988		ENSMUSG00000020166	Cnot2	chr10	-	116517316	116517383	0.0009879	0.0897488
									ENSMUSG00000022884	Eif4a2	chr16	+	23108584	23108633	0.00188384	0.0696671		ENSMUSG00000006392	Med8	chr4	+	118410884	118411003	1.80274e-07	8.33975e-05		ENSMUSG00000026269	Rnpepl1	chr1	+	92918017	92919103	0.0036069	0.105778		ENSMUSG00000024589	Nedd4l	chr18	+	65167513	65167573	0.00100035	0.0897488
									ENSMUSG00000005698	Ctcf	chr8	+	105680070	105680259	0.00190421	0.0696671		ENSMUSG00000027366	Sppl2a	chr2	-	126913299	126913353	1.81315e-07	8.33975e-05		ENSMUSG00000036023	Parp2	chr14	+	50814869	50815427	0.00395365	0.114776		ENSMUSG00000027366	Sppl2a	chr2	-	126908105	126908180	0.000990963	0.0897488
									ENSMUSG00000034165	Ccnd3	chr17	+	47593608	47593852	0.00196247	0.0710805		ENSMUSG00000087177	E130307A14Rik	chr10	-	39655839	39655929	1.99239e-07	9.07256e-05		ENSMUSG00000025498	Irf7	chr7	-	141264492	141264783	0.00439838	0.126079		ENSMUSG00000047213	Ythdf3	chr3	+	16186966	16187115	0.00103482	0.0910456
									ENSMUSG00000042831	Alkbh6	chr7	+	30312505	30312707	0.0019954	0.0712103		ENSMUSG00000031068	Glrx3	chr7	+	137452452	137452541	2.02786e-07	9.14265e-05		ENSMUSG00000060373	Hnrnpc	chr14	-	52098014	52098544	0.00443074	0.126079		ENSMUSG00000030086	Chchd6	chr6	-	89419747	89419818	0.00103531	0.0910456
									ENSMUSG00000031816	Mthfsd	chr8	-	121104391	121104558	0.00203139	0.0712103		ENSMUSG00000026821	Ralgds	chr2	+	28543988	28544386	2.16108e-07	9.64776e-05		ENSMUSG00000023495	Pcbp4	chr9	+	106462188	106462414	0.00451838	0.126541		ENSMUSG00000058239	Usf2	chr7	-	30956148	30956267	0.00110692	0.0943559
									ENSMUSG00000047554	Tmem41b	chr7	-	109979388	109979489	0.00201936	0.0712103		ENSMUSG00000024095	Hnrnpll	chr17	-	80044939	80045022	2.30739e-07	0.000101028		ENSMUSG00000014873	Surf2	chr2	+	26917427	26919055	0.00453504	0.126541		ENSMUSG00000026991	Pkp4	chr2	+	59214677	59214814	0.00111318	0.0943559
									ENSMUSG00000018501	Ncor1	chr11	-	62373075	62373622	0.00204469	0.0712103		ENSMUSG00000055897	Ppp4r1l-ps	chr2	-	173615482	173615576	2.28731e-07	0.000101028		ENSMUSG00000025722	Wdr73	chr7	-	80890723	80893341	0.0046006	0.127136		ENSMUSG00000036733	Rbm42	chr7	-	30644825	30645158	0.00112607	0.0943559
									ENSMUSG00000011831	Evi5	chr5	-	107821704	107821894	0.00208105	0.0717863		ENSMUSG00000042719	Naa25	chr5	+	121434825	121435069	2.52923e-07	0.000109687		ENSMUSG00000008398	Elk3	chr10	-	93264879	93265680	0.00482563	0.132084		ENSMUSG00000027333	Smox	chr2	+	131520094	131520268	0.00108384	0.0943559
									ENSMUSG00000036916	Zfp280c	chrX	-	48578379	48578556	0.00211351	0.0722182		ENSMUSG00000059119	Nap1l4	chr7	-	143546128	143546180	2.57079e-07	0.000110437		ENSMUSG00000003575	Crtc1	chr8	-	70391860	70392163	0.00489357	0.13268		ENSMUSG00000027333	Smox	chr2	+	131520411	131521171	0.00112099	0.0943559
									ENSMUSG00000021546	Hnrnpk	chr13	-	58391238	58392476	0.00227429	0.0769857		ENSMUSG00000026924	Sec16a	chr2	-	26413678	26413738	2.76864e-07	0.000117825		ENSMUSG00000015488	Cacfd1	chr2	+	27018887	27021089	0.00503739	0.135303		ENSMUSG00000028948	Nol9	chr4	+	152052597	152052709	0.00118023	0.0979705
									ENSMUSG00000036570	Fxyd1	chr7	-	31051681	31051815	0.00235887	0.0783838		ENSMUSG00000073838	Tufm	chr7	+	126488259	126488426	2.89742e-07	0.000122164		ENSMUSG00000031939	Taf1d	chr9	+	15310357	15311695	0.00533084	0.140558
									ENSMUSG00000038502	Ptov1	chr7	-	44863534	44864487	0.00233798	0.0783838		ENSMUSG00000009079	Ewsr1	chr11	-	5079484	5079519	2.98257e-07	0.0001246		ENSMUSG00000055681	Cope	chr8	+	70304633	70306651	0.00529851	0.140558
									ENSMUSG00000058427	Cxcl2	chr5	+	90904356	90905938	0.00255524	0.081185		ENSMUSG00000032006	Pdgfd	chr9	+	6359702	6359917	3.01351e-07	0.000124748		ENSMUSG00000035835	Plppr3	chr10	-	79866834	79867307	0.00540076	0.140775
									ENSMUSG00000005371	Fbxo11	chr17	-	88014405	88014550	0.00253123	0.081185		ENSMUSG00000001964	Emd	chrX	+	74256877	74256924	3.24805e-07	0.000133246		ENSMUSG00000027433	Xrn2	chr2	+	147029726	147029976	0.00543702	0.140775
									ENSMUSG00000032000	Birc3	chr9	-	7850919	7851171	0.00254081	0.081185		ENSMUSG00000037636	Slc25a43	chrX	+	36752132	36752374	3.32507e-07	0.000135142		ENSMUSG00000052144	Ppp4r2	chr6	+	100863122	100865217	0.00555032	0.141396
									ENSMUSG00000052609	Plekhg3	chr12	+	76572046	76572069	0.00255174	0.081185		ENSMUSG00000001622	Csn3	chr5	+	87928269	87928299	3.35361e-07	0.000135142		ENSMUSG00000073702	Rpl31	chr1	+	39367928	39368255	0.00555942	0.141396
									ENSMUSG00000056851	Pcbp2	chr15	+	102489751	102489807	0.00250408	0.081185		ENSMUSG00000014504	Srp19	chr18	+	34334292	34334364	3.40099e-07	0.000135849		ENSMUSG00000020329	Polrmt	chr10	-	79737263	79737509	0.00577685	0.144371
									ENSMUSG00000039221	Rpl22l1	chr3	+	28806669	28806858	0.00270903	0.0853226		ENSMUSG00000025290	Rps24	chr14	+	24495429	24495449	3.49086e-07	0.000138226		ENSMUSG00000032030	Cul5	chr9	-	53632272	53633839	0.00573849	0.144371
									ENSMUSG00000002578	Ikzf4	chr10	-	128642628	128642793	0.00276141	0.0854033		ENSMUSG00000020310	Madcam1	chr10	+	79666338	79666770	3.56794e-07	0.00014006		ENSMUSG00000074643	Cpne1	chr2	-	156073798	156074309	0.0058281	0.144396
									ENSMUSG00000020167	Tcf3	chr10	-	80410397	80410624	0.00282755	0.0854033		ENSMUSG00000024969	Mark2	chr19	-	7279985	7280012	3.64539e-07	0.000141877		ENSMUSG00000038828	Tmem214	chr5	+	30871419	30871855	0.00593244	0.145725
									ENSMUSG00000036552	Ermard	chr17	+	15063601	15064232	0.002784	0.0854033		ENSMUSG00000030591	Psmd8	chr7	-	29176072	29176173	3.79536e-07	0.000146462		ENSMUSG00000019518	Ap4m1	chr5	+	138177922	138178180	0.00617373	0.150367
									ENSMUSG00000034164	Emid1	chr11	-	5143826	5143930	0.0027982	0.0854033		ENSMUSG00000030591	Psmd8	chr7	-	29179142	29179215	3.85106e-07	0.000147363		ENSMUSG00000026509	Capn2	chr1	-	182489964	182491035	0.00632159	0.152674
									ENSMUSG00000054387	Mdm4	chr1	-	133004653	133004721	0.00282949	0.0854033		ENSMUSG00000022841	Ap2m1	chr16	+	20540807	20540813	3.90786e-07	0.000147791		ENSMUSG00000025332	Kdm5c	chrX	+	152244872	152245283	0.0069166	0.165652
									ENSMUSG00000063889	Crem	chr18	-	3266355	3268129	0.00293856	0.0879625		ENSMUSG00000043872	Zmym1	chr4	-	127054207	127054382	3.92715e-07	0.000147791		ENSMUSG00000041354	Rgl2	chr17	+	33932039	33932371	0.0071934	0.170858
									ENSMUSG00000036561	Ppp6r2	chr15	+	89256662	89256849	0.00301083	0.0893872		ENSMUSG00000026096	Osgepl1	chr1	+	53321495	53321567	4.11923e-07	0.000153748		ENSMUSG00000021748	Pdhb	chr14	-	8171422	8172817	0.00757456	0.176986
									ENSMUSG00000003299	Mrpl4	chr9	+	21007363	21007540	0.00322218	0.0948839		ENSMUSG00000031788	Kifc3	chr8	-	95129195	95129334	4.47128e-07	0.000165532		ENSMUSG00000039994	Timeless	chr10	+	128239833	128240291	0.00751303	0.176986
									ENSMUSG00000004562	Arhgef40	chr14	+	52004878	52005035	0.00335905	0.0981167		ENSMUSG00000024222	Fkbp5	chr17	-	28402608	28402848	4.86549e-07	0.000178673		ENSMUSG00000056962	Jmjd6	chr11	-	116839837	116840545	0.00774211	0.179442
									ENSMUSG00000054874	Pcnx3	chr19	-	5681431	5681592	0.00340588	0.0986888		ENSMUSG00000028246	Faxc	chr4	+	21958443	21958667	4.95079e-07	0.000180351		ENSMUSG00000041459	Tardbp	chr4	-	148612381	148618791	0.00809323	0.183149
									ENSMUSG00000028759	Hp1bp3	chr4	+	138223489	138223649	0.00362529	0.103392		ENSMUSG00000031967	Afg3l1	chr8	+	123499991	123500107	5.24283e-07	0.000189474		ENSMUSG00000031819	Emc8	chr8	-	120658527	120659074	0.00806039	0.183149
									ENSMUSG00000032193	Ldlr	chr9	+	21738854	21739557	0.00360164	0.103392		ENSMUSG00000071172	Srsf3	chr17	+	29039453	29039909	5.30261e-07	0.000190126		ENSMUSG00000033819	Ppp1r16a	chr15	+	76693013	76693724	0.00808654	0.183149
									ENSMUSG00000024539	Ptpn2	chr18	-	67675719	67675886	0.0036789	0.104101		ENSMUSG00000030591	Psmd8	chr7	-	29178918	29179021	5.6745e-07	0.00020187		ENSMUSG00000032067	Pts	chr9	-	50524722	50526949	0.00845917	0.188462
																		ENSMUSG00000024456	Diaph1	chr18	-	37906387	37906414	7.23343e-07	0.000255334		ENSMUSG00000009995	Taz	chrX	+	74288177	74288513	0.00840962	0.188462
																		ENSMUSG00000022817	Itgb5	chr16	+	33946490	33946610	7.95785e-07	0.000278745		ENSMUSG00000006736	Tspan31	chr10	-	127068479	127068988	0.00864443	0.190987
																		ENSMUSG00000028776	Tinagl1	chr4	-	130173892	130174207	8.19607e-07	0.000284898		ENSMUSG00000045411	2410002F23Rik	chr7	+	44250308	44252312	0.00870539	0.190987
																		ENSMUSG00000052337	Immt	chr6	+	71866725	71866740	8.54993e-07	0.000294947		ENSMUSG00000074797	Itpa	chr2	+	130671400	130671620	0.00929538	0.202386
																		ENSMUSG00000037608	Bclaf1	chr10	+	20332395	20332557	8.63614e-07	0.000295681		ENSMUSG00000027134	Lpcat4	chr2	+	112242475	112242761	0.00969515	0.208957
																		ENSMUSG00000055897	Ppp4r1l-ps	chr2	-	173615482	173616423	8.91123e-07	0.000302822		ENSMUSG00000010057	Nprl2	chr9	+	107544913	107545387	0.0097426	0.208957
																		ENSMUSG00000057335	Cep170	chr1	-	176761350	176761500	1.07679e-06	0.000363206		ENSMUSG00000022552	Sharpin	chr15	-	76347258	76347817	0.009929	0.211377
																		ENSMUSG00000006728	Cdk4	chr10	+	127064201	127064453	1.08946e-06	0.000364777		ENSMUSG00000026554	Dcaf8	chr1	+	172186295	172187460	0.0101759	0.215041
																		ENSMUSG00000006728	Cdk4	chr10	+	127064219	127064453	1.21804e-06	0.000404851		ENSMUSG00000034211	Mrps17	chr5	+	129715683	129716866	0.0110798	0.232433
																		ENSMUSG00000056076	Eif3b	chr5	+	140439912	140440051	1.25321e-06	0.000411006		ENSMUSG00000014303	Glis2	chr16	+	4611532	4611869	0.0117722	0.243405
																		ENSMUSG00000032497	Lrrfip2	chr9	+	111167199	111167244	1.25461e-06	0.000411006		ENSMUSG00000019039	Dalrd3	chr9	+	108571781	108572297	0.0117427	0.243405
																		ENSMUSG00000020777	Acox1	chr11	-	116189414	116189575	1.27066e-06	0.000413292		ENSMUSG00000039701	Usp53	chr3	-	122961154	122961432	0.0123943	0.25076
																		ENSMUSG00000014791	Elmo3	chr8	+	105306377	105306428	1.39482e-06	0.000450459		ENSMUSG00000004562	Arhgef40	chr14	+	52004878	52005035	0.0124769	0.25076
																		ENSMUSG00000028559	Osbpl9	chr4	-	109107880	109107949	1.48523e-06	0.000476279		ENSMUSG00000031146	Plp2	chrX	-	7669414	7669758	0.0122959	0.25076
																		ENSMUSG00000002602	Axl	chr7	-	25773342	25773493	1.51359e-06	0.000478631		ENSMUSG00000018599	Mief2	chr11	+	60730282	60730792	0.0123507	0.25076
																		ENSMUSG00000027455	Nsfl1c	chr2	+	151502454	151502460	1.50984e-06	0.000478631		ENSMUSG00000029071	Dvl1	chr4	+	155853636	155854086	0.0126012	0.251499
																		ENSMUSG00000005417	Mprip	chr11	+	59772151	59772217	1.58349e-06	0.00049728		ENSMUSG00000074578	Zfas1	chr2	+	167065433	167065862	0.0130531	0.258721
																		ENSMUSG00000035236	Scai	chr2	-	39102320	39102399	1.67034e-06	0.000517419		ENSMUSG00000000561	Wdr77	chr3	+	105965764	105966425	0.013916	0.273936
																		ENSMUSG00000005087	Cd44	chr2	-	102831329	102831536	1.66323e-06	0.000517419		ENSMUSG00000030703	Gdpd3	chr7	+	126770987	126771213	0.0143988	0.27961
																		ENSMUSG00000030512	Snrpa1	chr7	+	66070118	66070198	1.77634e-06	0.000540853		ENSMUSG00000022562	Oplah	chr15	-	76296602	76297018	0.0143153	0.27961
																		ENSMUSG00000027333	Smox	chr2	+	131520411	131520646	1.77017e-06	0.000540853		ENSMUSG00000071337	Tia1	chr6	+	86418877	86420411	0.0146489	0.282502
																		ENSMUSG00000013787	Ehmt2	chr17	+	34911362	34911478	1.78162e-06	0.000540853		ENSMUSG00000001082	Mfsd10	chr5	-	34634590	34634962	0.0147444	0.282502
																		ENSMUSG00000037552	Plekhg2	chr7	-	28370877	28371042	1.927e-06	0.000581111		ENSMUSG00000019823	Mical1	chr10	+	41486593	41487030	0.0148663	0.282952
																		ENSMUSG00000074643	Cpne1	chr2	-	156098229	156098372	1.98463e-06	0.000594553		ENSMUSG00000031511	Arhgef7	chr8	+	11781154	11782655	0.0149927	0.28348
																		ENSMUSG00000021224	Numb	chr12	-	83797196	83797343	2.12929e-06	0.000630924		ENSMUSG00000020486	2018-09-04	chr11	+	87589655	87590055	0.0165455	0.30482
																		ENSMUSG00000052337	Immt	chr6	+	71852729	71852867	2.13375e-06	0.000630924		ENSMUSG00000029290	Zfp326	chr5	+	105886316	105888839	0.0165369	0.30482
																		ENSMUSG00000023348	Trip6	chr5	-	137312139	137312233	2.24632e-06	0.000659924		ENSMUSG00000022983	Scaf4	chr16	-	90242526	90242958	0.016489	0.30482
																		ENSMUSG00000070419	Cyp3a57	chr5	+	145369025	145369139	2.28217e-06	0.00066616		ENSMUSG00000032316	Clk3	chr9	-	57758283	57761040	0.0162589	0.30482
																		ENSMUSG00000028188	Spata1	chr3	-	146487199	146487419	2.31839e-06	0.000672422		ENSMUSG00000002804	Nudt14	chr12	-	112938355	112938859	0.0167484	0.306497
																		ENSMUSG00000061046	Haghl	chr17	-	25785003	25785194	2.41475e-06	0.000695937		ENSMUSG00000016344	Ppdpf	chr2	+	181187549	181187886	0.0168499	0.306497
																		ENSMUSG00000061079	Zfp143	chr7	+	110072121	110072202	2.46091e-06	0.000700375		ENSMUSG00000024002	Brd4	chr17	-	32198030	32198562	0.017644	0.318923
																		ENSMUSG00000069565	Dazap1	chr10	+	80280928	80281011	2.45548e-06	0.000700375		ENSMUSG00000020307	Cdc34	chr10	+	79685004	79685367	0.0179026	0.321576
																		ENSMUSG00000034382	AI661453	chr17	+	47465678	47468853	2.49122e-06	0.000704599		ENSMUSG00000006179	Prss16	chr13	-	22002925	22003325	0.0184712	0.323966
																		ENSMUSG00000021302	Ggps1	chr13	-	14058923	14059211	2.61972e-06	0.00073185		ENSMUSG00000017210	Med24	chr11	-	98705118	98705602	0.018188	0.323966
																		ENSMUSG00000034088	Hdlbp	chr1	-	93414811	93414966	2.61473e-06	0.00073185		ENSMUSG00000019518	Ap4m1	chr5	+	138172348	138172893	0.0186375	0.323966
																		ENSMUSG00000031819	Emc8	chr8	-	120658527	120658622	2.66506e-06	0.000739975		ENSMUSG00000020538	Srebf1	chr11	-	60203098	60203607	0.018712	0.323966
																		ENSMUSG00000057092	Fxyd3	chr7	-	31073581	31073635	2.70362e-06	0.000746132		ENSMUSG00000023007	Prpf40b	chr15	+	99314842	99315286	0.0186175	0.323966
																		ENSMUSG00000022838	Eaf2	chr16	-	36810471	36810608	2.7671e-06	0.000759053		ENSMUSG00000029221	Slc30a9	chr5	+	67342093	67344569	0.0185504	0.323966
																		ENSMUSG00000024414	Mrpl27	chr11	+	94656407	94656618	2.798e-06	0.000762933		ENSMUSG00000038685	Rtel1	chr2	+	181354352	181355552	0.0193702	0.324028
																		ENSMUSG00000008976	Gabpa	chr16	+	84852459	84852654	2.82313e-06	0.000765203		ENSMUSG00000038812	Trmt112	chr19	+	6910583	6911028	0.0192488	0.324028
																		ENSMUSG00000025529	Zfp711	chrX	+	112628103	112628148	2.85799e-06	0.000770067		ENSMUSG00000036672	Cenpt	chr8	-	105849625	105849923	0.0192147	0.324028
																		ENSMUSG00000000131	Xpo6	chr7	-	126115807	126115952	2.89643e-06	0.000775834		ENSMUSG00000038520	Tbc1d17	chr7	-	44841982	44842300	0.0192774	0.324028
																		ENSMUSG00000033565	Rbfox2	chr15	-	77094450	77094490	2.98975e-06	0.000796148		ENSMUSG00000015536	Mocs2	chr13	+	114825210	114826281	0.019392	0.324028
																		ENSMUSG00000032178	Ilf3	chr9	+	21395370	21395468	3.02435e-06	0.000799805		ENSMUSG00000027944	Hax1	chr3	-	89997386	89998003	0.0190536	0.324028
																		ENSMUSG00000057858	Fam204a	chr19	-	60221053	60221304	3.03861e-06	0.000799805		ENSMUSG00000030083	Abtb1	chr6	-	88840709	88840900	0.0201181	0.334216
																		ENSMUSG00000026447	Pik3c2b	chr1	+	133086936	133087079	3.11937e-06	0.000816343		ENSMUSG00000053253	Ndfip2	chr14	+	105298002	105304836	0.0205719	0.339791
																		ENSMUSG00000037606	Osbpl5	chr7	-	143704968	143705140	3.18273e-06	0.000828164		ENSMUSG00000030815	Phkg2	chr7	+	127577534	127578029	0.0210547	0.345779
																		ENSMUSG00000052337	Immt	chr6	+	71852765	71852867	3.20568e-06	0.000829398		ENSMUSG00000028099	Polr3c	chr3	-	96723513	96724052	0.0213057	0.347912
																		ENSMUSG00000042524	Sun2	chr15	-	79737472	79737568	3.25189e-06	0.0008366		ENSMUSG00000038671	Arfrp1	chr2	-	181361000	181361472	0.0219644	0.356643
																		ENSMUSG00000061950	Ppp4r1	chr17	+	65829870	65829990	3.42528e-06	0.000874001		ENSMUSG00000037845	Fdxacb1	chr9	+	50770109	50770790	0.0222076	0.358566
																		ENSMUSG00000031781	Ciapin1	chr8	-	94826634	94826708	3.43566e-06	0.000874001		ENSMUSG00000062729	Ppox	chr1	-	171278134	171279313	0.0224019	0.359683
																		ENSMUSG00000026269	Rnpepl1	chr1	+	92915813	92915965	3.54428e-06	0.000886655		ENSMUSG00000027889	Ampd2	chr3	-	108075248	108075704	0.0227153	0.362687
																		ENSMUSG00000038546	Ranbp9	chr13	-	43434813	43434981	3.56329e-06	0.000886655		ENSMUSG00000031342	Gpm6b	chrX	+	166385390	166388988	0.023053	0.364035
																		ENSMUSG00000073139	Tmem185a	chrX	-	70465002	70465086	3.55581e-06	0.000886655		ENSMUSG00000028849	Map7d1	chr4	-	126236895	126237278	0.0230503	0.364035
																		ENSMUSG00000020892	Aloxe3	chr11	+	69135005	69135175	3.51073e-06	0.000886655		ENSMUSG00000062202	Btbd9	chr17	-	30215523	30220570	0.0233734	0.365083
																		ENSMUSG00000001054	Rmnd5b	chr11	-	51627879	51628025	3.68579e-06	0.000912152		ENSMUSG00000073758	Sh3d21	chr4	-	126161967	126162266	0.0233528	0.365083
																		ENSMUSG00000024414	Mrpl27	chr11	+	94656486	94656618	3.82448e-06	0.000941359		ENSMUSG00000019261	Map1s	chr8	+	70910944	70912653	0.0238901	0.36914
																		ENSMUSG00000027333	Smox	chr2	+	131520921	131521171	4.02304e-06	0.000984909		ENSMUSG00000039536	Stau1	chr2	-	166951270	166952472	0.0237939	0.36914
																		ENSMUSG00000005087	Cd44	chr2	-	102832482	102832572	4.12387e-06	0.0010042		ENSMUSG00000024787	Snx15	chr19	-	6123829	6124188	0.0245398	0.377152
																		ENSMUSG00000030265	Kras	chr6	-	145225073	145225197	4.23644e-06	0.00102612		ENSMUSG00000041777	Cir1	chr2	-	73305889	73306341	0.0247424	0.378243
																		ENSMUSG00000021709	Erbin	chr13	-	103824719	103824848	4.29746e-06	0.00103539		ENSMUSG00000036672	Cenpt	chr8	-	105844672	105845178	0.0259404	0.390328
																		ENSMUSG00000058709	Egln2	chr7	-	27159786	27159923	4.36567e-06	0.00104629		ENSMUSG00000093674	Rpl41	chr10	-	128548657	128548971	0.0258293	0.390328
																		ENSMUSG00000051223	Bzw1	chr1	+	58404231	58404354	4.49727e-06	0.00107171		ENSMUSG00000031065	Cdk16	chrX	+	20696730	20696964	0.0257413	0.390328
																		ENSMUSG00000015120	Ube2i	chr17	-	25272537	25272765	4.51882e-06	0.00107171		ENSMUSG00000033589	Reep4	chr14	+	70546929	70547235	0.0261867	0.391982
																		ENSMUSG00000066839	Ecsit	chr9	-	22084022	22084208	4.73384e-06	0.00111113		ENSMUSG00000039456	Morc3	chr16	+	93862413	93862715	0.0265505	0.392124
																		ENSMUSG00000006024	Napa	chr7	+	16112583	16112630	4.72398e-06	0.00111113		ENSMUSG00000068245	Phf11d	chr14	-	59348731	59349388	0.0265905	0.392124
																		ENSMUSG00000024283	Wac	chr18	+	7910515	7910824	5.07178e-06	0.00118435		ENSMUSG00000037326	Capn15	chr17	-	25960064	25960563	0.0266055	0.392124
																		ENSMUSG00000031819	Emc8	chr8	-	120659004	120659074	5.28047e-06	0.00122375		ENSMUSG00000021832	Psmc6	chr14	+	45330829	45331026	0.0271147	0.39759
																		ENSMUSG00000033423	Eri3	chr4	+	117587784	117587980	5.30556e-06	0.00122375		ENSMUSG00000003549	Ercc1	chr7	+	19355100	19355361	0.0276066	0.402748
																		ENSMUSG00000057858	Fam204a	chr19	-	60220489	60220577	5.32111e-06	0.00122375		ENSMUSG00000049643	2310022A10Rik	chr7	+	27580336	27582099	0.02929	0.42042
																		ENSMUSG00000031565	Fgfr1	chr8	+	25564339	25564484	5.47225e-06	0.00125218		ENSMUSG00000018800	Abca5	chr11	-	110326559	110327936	0.0294924	0.42042
																		ENSMUSG00000027333	Smox	chr2	+	131520411	131521171	5.68909e-06	0.00129529		ENSMUSG00000010097	Nxf1	chr19	+	8767079	8767283	0.0291226	0.42042
																		ENSMUSG00000034480	Diaph2	chrX	+	129801394	129801427	5.79504e-06	0.00131285		ENSMUSG00000001416	Cct3	chr3	+	88300799	88300991	0.029432	0.42042
																		ENSMUSG00000050530	Fam171a1	chr2	+	3223469	3223584	6.15498e-06	0.00138749		ENSMUSG00000066456	Hmgn3	chr9	-	83109947	83111106	0.0295493	0.42042
																		ENSMUSG00000031995	St14	chr9	-	31108570	31108730	6.22774e-06	0.00139013		ENSMUSG00000019254	Ppp1r12c	chr7	-	4484449	4484771	0.0300931	0.423959
																		ENSMUSG00000040479	Dgkz	chr2	-	91945173	91945924	6.19766e-06	0.00139013		ENSMUSG00000023755	Rhebl1	chr15	-	98878452	98879055	0.0300892	0.423959
																		ENSMUSG00000053091	Lins1	chr7	+	66696175	66696306	6.27389e-06	0.0013936		ENSMUSG00000032180	Tmed1	chr9	-	21508930	21509351	0.030516	0.426804
																		ENSMUSG00000020696	Rffl	chr11	-	82834080	82834279	6.34099e-06	0.00140167		ENSMUSG00000027423	Snx5	chr2	-	144254725	144254942	0.0305921	0.426804
																		ENSMUSG00000021629	Slc30a5	chr13	-	100809083	100809279	6.43986e-06	0.00141665		ENSMUSG00000038671	Arfrp1	chr2	-	181364013	181364398	0.0318804	0.434238
																		ENSMUSG00000027333	Smox	chr2	+	131521054	131521171	6.50699e-06	0.00142453		ENSMUSG00000022614	Lmf2	chr15	-	89354426	89354817	0.0316127	0.434238
																		ENSMUSG00000030104	Edem1	chr6	+	108844826	108845010	6.56462e-06	0.00143027		ENSMUSG00000071074	Yipf3	chr17	+	46251113	46251487	0.0312761	0.434238
																		ENSMUSG00000018932	Map2k3	chr11	+	60945510	60945562	6.62858e-06	0.00143733		ENSMUSG00000059540	Tcea2	chr2	+	181686189	181686752	0.0314798	0.434238
																		ENSMUSG00000079020	Slc45a4	chr15	-	73585287	73585387	6.71921e-06	0.00145008		ENSMUSG00000027367	Stard7	chr2	+	127284094	127284581	0.031873	0.434238
																		ENSMUSG00000056737	Capg	chr6	+	72555476	72555649	6.80511e-06	0.00146169		ENSMUSG00000022554	Hgh1	chr15	+	76369855	76370253	0.0334222	0.452942
																		ENSMUSG00000069020	Urm1	chr2	+	29842461	29842546	7.00965e-06	0.00149855		ENSMUSG00000028907	Utp11	chr4	-	124682412	124683348	0.033884	0.452942
																		ENSMUSG00000026743	Mllt10	chr2	+	18171042	18171075	7.18434e-06	0.00152872		ENSMUSG00000022556	Hsf1	chr15	+	76500130	76500336	0.0336246	0.452942
																		ENSMUSG00000025856	Pdgfa	chr5	-	138978621	138978690	7.23459e-06	0.00153225		ENSMUSG00000009995	Taz	chrX	+	74288177	74288513	0.0338069	0.452942
																		ENSMUSG00000061136	Prpf40a	chr2	-	53153963	53154072	7.3099e-06	0.00154104		ENSMUSG00000000441	Raf1	chr6	-	115620208	115621862	0.0344659	0.458588
																		ENSMUSG00000005150	Wdr83	chr8	-	85080119	85080225	7.55618e-06	0.00158561		ENSMUSG00000031858	Mau2	chr8	-	70022619	70023697	0.0346956	0.459517
																		ENSMUSG00000056737	Capg	chr6	+	72555476	72555905	8.05474e-06	0.00168248		ENSMUSG00000036073	Galt	chr4	+	41756512	41756811	0.0353078	0.46548
																		ENSMUSG00000034269	Setd5	chr6	+	113110084	113110221	8.20099e-06	0.00170521		ENSMUSG00000068876	Cgn	chr3	-	94777993	94778270	0.0358606	0.46635
																		ENSMUSG00000029672	Fam3c	chr6	-	22355013	22355234	8.30985e-06	0.0017122		ENSMUSG00000108414	Snhg1	chr19	+	8725013	8725256	0.0357457	0.46635
																		ENSMUSG00000060373	Hnrnpc	chr14	-	52098315	52098544	8.27612e-06	0.0017122		ENSMUSG00000032590	Apeh	chr9	-	108091970	108092179	0.0358256	0.46635
																		ENSMUSG00000030282	Cmas	chr6	+	142764286	142764429	8.40815e-06	0.00171692		ENSMUSG00000037300	Ttc13	chr8	-	124673447	124673735	0.0364546	0.47194
																		ENSMUSG00000030016	Zfp638	chr6	+	83928652	83930165	8.40533e-06	0.00171692		ENSMUSG00000042831	Alkbh6	chr7	+	30312236	30312707	0.0371457	0.474474
																		ENSMUSG00000098950	Gm28036	chr2	-	156098184	156098372	8.59745e-06	0.00174774		ENSMUSG00000032182	Yipf2	chr9	-	21588681	21589760	0.0370669	0.474474
																		ENSMUSG00000050565	Tor1aip2	chr1	+	156041074	156041134	8.66438e-06	0.00175352		ENSMUSG00000015790	Surf1	chr2	-	26915595	26916006	0.0369374	0.474474
																		ENSMUSG00000028555	Ttc39a	chr4	+	109443507	109443624	8.7797e-06	0.00176899		ENSMUSG00000008855	Hdac5	chr11	-	102195748	102196117	0.0384002	0.488278
																		ENSMUSG00000025145	Lrrc45	chr11	+	120718649	120718720	8.99764e-06	0.00180492		ENSMUSG00000037447	Arid5a	chr1	+	36317203	36317662	0.0385661	0.488278
																		ENSMUSG00000038416	Cdc16	chr8	+	13769376	13769502	9.13045e-06	0.00182353		ENSMUSG00000033542	Arhgef5	chr6	+	43283892	43285429	0.0402617	0.50751
																		ENSMUSG00000022587	Ly6e	chr15	+	74957414	74957463	9.2211e-06	0.00183359		ENSMUSG00000023007	Prpf40b	chr15	+	99309684	99310035	0.0408472	0.512642
																		ENSMUSG00000021282	Eif5	chr12	+	111538354	111538548	9.28941e-06	0.00183914		ENSMUSG00000035086	Becn1	chr11	-	101294000	101295164	0.0416314	0.520212
																		ENSMUSG00000025059	Gk	chrX	-	85706237	85706324	9.42019e-06	0.00185696		ENSMUSG00000094870	Zfp131	chr13	-	119775766	119776449	0.041967	0.522135
																		ENSMUSG00000042216	Sgsm1	chr5	-	113277508	113277673	9.76695e-06	0.00191702		ENSMUSG00000025747	Tyms	chr5	-	30069833	30071707	0.0423313	0.522147
																		ENSMUSG00000030086	Chchd6	chr6	-	89467389	89467473	1.01212e-05	0.00197801		ENSMUSG00000006676	Usp19	chr9	+	108497895	108498241	0.0422848	0.522147
																		ENSMUSG00000039585	Myo9a	chr9	+	59790035	59790092	1.01916e-05	0.00198326		ENSMUSG00000040345	Arhgap9	chr10	+	127328093	127328524	0.0427675	0.525272
																		ENSMUSG00000021432	Slc35b3	chr13	-	38944499	38944654	1.03278e-05	0.00200122		ENSMUSG00000022199	Slc22a17	chr14	-	54907885	54908366	0.0439307	0.530491
																		ENSMUSG00000027900	Dram2	chr3	+	106571610	106571693	1.0522e-05	0.00203021		ENSMUSG00000031816	Mthfsd	chr8	-	121098707	121099152	0.043761	0.530491
																		ENSMUSG00000061079	Zfp143	chr7	+	110072118	110072202	1.11757e-05	0.00210619		ENSMUSG00000002825	Qtrt1	chr9	+	21412232	21412531	0.0436341	0.530491
																		ENSMUSG00000097039	Pvt1	chr15	+	62175466	62175548	1.11026e-05	0.00210619		ENSMUSG00000025504	Eps8l2	chr7	+	141341892	141342110	0.0434059	0.530491
																		ENSMUSG00000055436	Srsf11	chr3	-	158024122	158024231	1.11933e-05	0.00210619		ENSMUSG00000024911	Fibp	chr19	+	5463786	5464215	0.0450843	0.542144
																		ENSMUSG00000049659	Aftph	chr11	-	20696750	20696831	1.09971e-05	0.00210619		ENSMUSG00000031858	Mau2	chr8	-	70022619	70023697	0.0462558	0.553913
																		ENSMUSG00000066595	Flvcr1	chr1	-	191021075	191021256	1.11894e-05	0.00210619		ENSMUSG00000006215	Zbtb17	chr4	+	141464236	141464702	0.0468896	0.559173
																		ENSMUSG00000022340	Sybu	chr15	-	44683347	44683450	1.10645e-05	0.00210619		ENSMUSG00000020775	Mrpl38	chr11	-	116134907	116135325	0.0481401	0.571713
																		ENSMUSG00000002496	Tsc2	chr17	-	24606223	24606352	1.13194e-05	0.00212116		ENSMUSG00000015176	Nolc1	chr19	+	46078702	46079021	0.0490079	0.579624
																		ENSMUSG00000028277	Ube2j1	chr4	+	33045079	33045199	1.1658e-05	0.00217565		ENSMUSG00000038346	Zfp384	chr6	+	125024032	125025082	0.0506628	0.596742
																		ENSMUSG00000055296	Tmem245	chr4	-	56903211	56903247	1.21249e-05	0.00224438		ENSMUSG00000005687	Bcas2	chr3	+	103174339	103177419	0.0514875	0.600375
																		ENSMUSG00000020700	Map3k3	chr11	+	106151008	106151140	1.21016e-05	0.00224438		ENSMUSG00000022390	Zc3h7b	chr15	+	81780403	81782059	0.0515022	0.600375
																		ENSMUSG00000025332	Kdm5c	chrX	+	152267894	152268000	1.22431e-05	0.00225709		ENSMUSG00000062270	Morf4l1	chr9	-	90097371	90100523	0.0515979	0.600375
																		ENSMUSG00000000884	Gnb1l	chr16	+	18544114	18544273	1.24281e-05	0.00228197		ENSMUSG00000022420	Dnal4	chr15	-	79761452	79762525	0.0523032	0.601278
																		ENSMUSG00000029650	Slc46a3	chr5	-	147894480	147894596	1.2534e-05	0.00228636		ENSMUSG00000085385	Snhg17	chr2	-	158359181	158360599	0.0521386	0.601278
																		ENSMUSG00000021709	Erbin	chr13	-	103824719	103824926	1.25967e-05	0.00228636		ENSMUSG00000039768	Dnajc11	chr4	+	151968498	151970930	0.0521617	0.601278
																		ENSMUSG00000031596	Slc7a2	chr8	+	40908055	40908195	1.26055e-05	0.00228636		ENSMUSG00000020817	Rabep1	chr11	+	70934404	70935182	0.0532955	0.607822
																		ENSMUSG00000042510	AA986860	chr1	+	130737501	130737687	1.26529e-05	0.00228636		ENSMUSG00000005354	Txn2	chr15	-	77915046	77915857	0.0530921	0.607822
																		ENSMUSG00000026269	Rnpepl1	chr1	+	92915823	92915965	1.27612e-05	0.00229682		ENSMUSG00000039308	Ndst2	chr14	-	20724460	20724820	0.0537309	0.610367
																		ENSMUSG00000062604	Srpk2	chr5	-	23616326	23616390	1.30597e-05	0.00234129		ENSMUSG00000037740	Mrps26	chr2	+	130564080	130564431	0.0546538	0.618405
																		ENSMUSG00000061461	Smim20	chr5	+	53268022	53268070	1.31163e-05	0.00234221		ENSMUSG00000032316	Clk3	chr9	-	57758283	57761040	0.0552655	0.622874
																		ENSMUSG00000020212	Mdm1	chr10	+	118166624	118166684	1.34543e-05	0.00239319		ENSMUSG00000024019	Cmtr1	chr17	+	29698637	29699288	0.0564354	0.633575
																		ENSMUSG00000027883	Gpsm2	chr3	-	108711276	108711580	1.41845e-05	0.00251326		ENSMUSG00000029267	Mtf2	chr5	+	108080824	108081023	0.0569243	0.636578
																		ENSMUSG00000022892	App	chr16	-	84971407	84971461	1.439e-05	0.00253977		ENSMUSG00000020282	Rhbdf1	chr11	-	32212622	32212942	0.0573497	0.638849
																		ENSMUSG00000052337	Immt	chr6	+	71852762	71852867	1.47273e-05	0.00258927		ENSMUSG00000040434	Large2	chr2	-	92365626	92366068	0.0576602	0.639828
																		ENSMUSG00000066687	Zbtb16	chr9	-	48665154	48665325	1.484e-05	0.00259906		ENSMUSG00000031388	Naa10	chrX	-	73919501	73919869	0.0580144	0.63995
																		ENSMUSG00000022377	Asap1	chr15	-	64110905	64111076	1.50628e-05	0.00262796		ENSMUSG00000010936	Vac14	chr8	+	110710317	110711711	0.0581166	0.63995
																		ENSMUSG00000111497	Gm38431	chr9	-	21073263	21073318	1.56201e-05	0.00271479		ENSMUSG00000036606	Plxnb2	chr15	-	89157185	89157539	0.0589566	0.646722
																		ENSMUSG00000070436	Serpinh1	chr7	-	99352881	99352965	1.58804e-05	0.00274954		ENSMUSG00000073758	Sh3d21	chr4	-	126152023	126152258	0.0611758	0.667714
																		ENSMUSG00000029860	Zyx	chr6	+	42356431	42356610	1.60291e-05	0.00276478		ENSMUSG00000071657	Bscl2	chr19	+	8847666	8847982	0.0613349	0.667714
																		ENSMUSG00000022094	Slc39a14	chr14	-	70315663	70315833	1.6249e-05	0.00279213		ENSMUSG00000032596	Uba7	chr9	+	107975796	107976189	0.0615824	0.667879
																		ENSMUSG00000039218	Srrm2	chr17	+	23811816	23812077	1.63891e-05	0.00280562		ENSMUSG00000056167	Cnot10	chr9	-	114597478	114598835	0.0628198	0.678738
																		ENSMUSG00000058690	Ccser2	chr14	-	36890341	36890426	1.68806e-05	0.00287893		ENSMUSG00000024454	Hdac3	chr18	-	37941378	37941766	0.0635408	0.683956
																		ENSMUSG00000032316	Clk3	chr9	-	57758626	57758723	1.71741e-05	0.00291806		ENSMUSG00000006498	Ptbp1	chr10	+	79858751	79859271	0.0643014	0.684391
																		ENSMUSG00000019647	Sema6a	chr18	-	47276418	47276469	1.73107e-05	0.00293034		ENSMUSG00000034211	Mrps17	chr5	+	129715683	129716866	0.0643959	0.684391
																		ENSMUSG00000045103	Dmd	chrX	+	85144910	85144949	1.75305e-05	0.00295655		ENSMUSG00000019802	Sec63	chr10	+	42796205	42798855	0.0645338	0.684391
																		ENSMUSG00000057230	Aak1	chr6	+	86959031	86959274	1.76355e-05	0.00296329		ENSMUSG00000064120	Mocs1	chr17	+	49454029	49455435	0.064233	0.684391
																		ENSMUSG00000056737	Capg	chr6	+	72555750	72555905	1.81544e-05	0.00303926		ENSMUSG00000015377	Dennd6b	chr15	-	89186955	89187243	0.0660608	0.69801
																		ENSMUSG00000055436	Srsf11	chr3	-	158031451	158031648	1.83519e-05	0.00306107		ENSMUSG00000024948	Map4k2	chr19	+	6346083	6346293	0.066565	0.699153
																		ENSMUSG00000000827	Tpd52l2	chr2	+	181502875	181502935	1.87657e-05	0.00311866		ENSMUSG00000040472	Rabggta	chr14	-	55721594	55721900	0.0666555	0.699153
																		ENSMUSG00000030649	Anapc15	chr7	+	101897188	101897360	1.96409e-05	0.00325224		ENSMUSG00000038520	Tbc1d17	chr7	-	44842815	44843111	0.0669935	0.700143
																		ENSMUSG00000037992	Rara	chr11	+	98966346	98966495	2.01476e-05	0.00330015		ENSMUSG00000052926	Rnaseh2a	chr8	-	84957666	84958089	0.0674993	0.702873
																		ENSMUSG00000038930	Rccd1	chr7	-	80321276	80321343	2.01e-05	0.00330015		ENSMUSG00000021453	Gadd45g	chr13	+	51847351	51847769	0.0680232	0.705771
																		ENSMUSG00000027800	Tm4sf1	chr3	-	57301521	57301636	2.00617e-05	0.00330015		ENSMUSG00000028952	Zbtb48	chr4	-	152025777	152027059	0.0696104	0.719641
																		ENSMUSG00000021361	Tmem14c	chr13	+	41017114	41017173	2.03535e-05	0.00332193		ENSMUSG00000027185	Nat10	chr2	-	103725663	103726239	0.0707738	0.727763
																		ENSMUSG00000042625	Safb2	chr17	-	56574201	56574302	2.05347e-05	0.00333952		ENSMUSG00000029208	Guf1	chr5	+	69567127	69568497	0.0709025	0.727763
																		ENSMUSG00000032418	Me1	chr9	-	86613540	86613638	2.14489e-05	0.00347579		ENSMUSG00000062963	Ufc1	chr1	-	171289517	171289947	0.0719114	0.732884
																		ENSMUSG00000036885	Arhgef26	chr3	+	62459609	62459714	2.26469e-05	0.00364399		ENSMUSG00000029617	Ccz1	chr5	-	144012993	144014877	0.0718244	0.732884
																		ENSMUSG00000020212	Mdm1	chr10	+	118147980	118148115	2.26454e-05	0.00364399		ENSMUSG00000025499	Hras	chr7	-	141190929	141191467	0.0723312	0.734557
																		ENSMUSG00000032178	Ilf3	chr9	+	21397968	21398136	2.31589e-05	0.00369208		ENSMUSG00000028392	Bspry	chr4	+	62495997	62497298	0.0725953	0.734644
																		ENSMUSG00000046434	Hnrnpa1	chr15	+	103242921	103243080	2.30414e-05	0.00369208		ENSMUSG00000022203	Efs	chr14	-	54920902	54921181	0.0742833	0.742991
																		ENSMUSG00000030322	Mbd4	chr6	-	115845542	115845617	2.3189e-05	0.00369208		ENSMUSG00000032786	Alas1	chr9	-	106241115	106241785	0.0743945	0.742991
																		ENSMUSG00000030760	Acer3	chr7	-	98259404	98259457	2.33439e-05	0.00370379		ENSMUSG00000046223	Plaur	chr7	+	24471898	24472707	0.0737942	0.742991
																		ENSMUSG00000040471	Ggt6	chr11	+	72436438	72436641	2.36424e-05	0.00373071		ENSMUSG00000021621	Zcchc9	chr13	-	91800610	91801016	0.0744542	0.742991
																		ENSMUSG00000070643	Sox13	chr1	-	133384412	133384673	2.36774e-05	0.00373071		ENSMUSG00000032580	Rbm5	chr9	-	107756908	107760391	0.0747637	0.743498
																		ENSMUSG00000037266	Rsrp1	chr4	+	134925776	134925821	2.40941e-05	0.0037738		ENSMUSG00000001909	Trmt1	chr8	+	84697114	84697348	0.0763875	0.746727
																		ENSMUSG00000026005	Rpe	chr1	+	66701616	66701648	2.41167e-05	0.0037738		ENSMUSG00000015536	Mocs2	chr13	+	114825210	114826281	0.0760483	0.746727
																		ENSMUSG00000029003	Mad2l2	chr4	+	148143541	148143642	2.44769e-05	0.00381705		ENSMUSG00000055862	Izumo4	chr10	+	80704417	80705373	0.0761546	0.746727
																		ENSMUSG00000019179	Mdh2	chr5	+	135784183	135784267	2.52744e-05	0.00392798		ENSMUSG00000038828	Tmem214	chr5	+	30872686	30873144	0.0762117	0.746727
																		ENSMUSG00000041921	Metap1d	chr2	+	71522532	71522630	2.60045e-05	0.0040178		ENSMUSG00000068917	Clk2	chr3	+	89168694	89170115	0.0761905	0.746727
																		ENSMUSG00000020265	Sumo3	chr10	+	77615926	77616034	2.60289e-05	0.0040178		ENSMUSG00000030232	Aebp2	chr6	+	140650755	140652826	0.0770399	0.748268
																		ENSMUSG00000034343	Ube2f	chr1	+	91253759	91253827	2.62143e-05	0.00403275		ENSMUSG00000056962	Jmjd6	chr11	-	116839837	116840545	0.0770658	0.748268
																		ENSMUSG00000038860	Garnl3	chr2	-	33085874	33085944	2.73783e-05	0.00419763		ENSMUSG00000021819	Zswim8	chr14	+	20713882	20714867	0.0781868	0.756596
																		ENSMUSG00000027514	Zbp1	chr2	-	173207741	173207919	2.75956e-05	0.00420266		ENSMUSG00000024914	Drap1	chr19	-	5424181	5424433	0.0798771	0.767782
																		ENSMUSG00000029048	Rer1	chr4	-	155083108	155083236	2.75403e-05	0.00420266		ENSMUSG00000053332	Gas5	chr1	+	161036207	161036579	0.0798549	0.767782
																		ENSMUSG00000004798	Ulk2	chr11	-	61782005	61782124	2.77156e-05	0.00420685		ENSMUSG00000108414	Snhg1	chr19	+	8724402	8724721	0.080638	0.771409
																		ENSMUSG00000002372	Ranbp3	chr17	+	56701448	56701541	2.81875e-05	0.00426428		ENSMUSG00000046032	Snx12	chrX	-	101211958	101213864	0.0810448	0.771409
																		ENSMUSG00000029033	Acap3	chr4	+	155902657	155902866	2.84462e-05	0.00428916		ENSMUSG00000025145	Lrrc45	chr11	+	120718441	120719132	0.0811236	0.771409
																		ENSMUSG00000034621	Gpatch8	chr11	-	102510216	102510261	2.88576e-05	0.00432949		ENSMUSG00000021555	Naa35	chr13	+	59607245	59607431	0.0813281	0.771409
																		ENSMUSG00000036501	Fam13b	chr18	-	34497967	34498159	2.89038e-05	0.00432949		ENSMUSG00000037761	Actr5	chr2	+	158635306	158636147	0.0837967	0.792209
																		ENSMUSG00000009291	Pttg1ip	chr10	+	77589633	77589742	2.91327e-05	0.00434946		ENSMUSG00000054662	Ano9	chr7	-	141107050	141107319	0.0845604	0.796808
																		ENSMUSG00000046434	Hnrnpa1	chr15	+	103244255	103245966	3.10882e-05	0.00462625		ENSMUSG00000054874	Pcnx3	chr19	-	5686626	5687218	0.0849195	0.797577
																		ENSMUSG00000038346	Zfp384	chr6	+	125031670	125032612	3.19228e-05	0.00473498		ENSMUSG00000031161	Hdac6	chrX	-	7939442	7939665	0.08558	0.801163
																		ENSMUSG00000032305	Fam219b	chr9	+	57539245	57539294	3.24007e-05	0.00474404		ENSMUSG00000020232	Hmg20b	chr10	-	81346051	81346477	0.0874854	0.81538
																		ENSMUSG00000020589	Fam49a	chr12	+	12276342	12276415	3.21668e-05	0.00474404		ENSMUSG00000028633	Ctps	chr4	-	120542530	120542765	0.0876661	0.81538
																		ENSMUSG00000021068	Nin	chr12	-	70111435	70111482	3.23708e-05	0.00474404		ENSMUSG00000053332	Gas5	chr1	+	161035982	161036244	0.0895613	0.830319
																		ENSMUSG00000033809	Alg3	chr16	-	20608485	20608646	3.23863e-05	0.00474404		ENSMUSG00000026965	Anapc2	chr2	+	25272914	25273932	0.0902173	0.833712
																		ENSMUSG00000021938	Pspc1	chr14	-	56771704	56772006	3.25708e-05	0.00475366		ENSMUSG00000020116	Pno1	chr11	-	17209076	17209394	0.0927311	0.854196
																		ENSMUSG00000024563	Smad2	chr18	+	76298447	76298501	3.37147e-05	0.00479946		ENSMUSG00000027297	Ltk	chr2	-	119753113	119753491	0.0936534	0.857197
																		ENSMUSG00000024563	Smad2	chr18	+	76299782	76299995	3.37278e-05	0.00479946		ENSMUSG00000022537	Tmem44	chr16	-	30540738	30543488	0.0935323	0.857197
																		ENSMUSG00000010608	Rbm25	chr12	+	83639127	83639191	3.33715e-05	0.00479946		ENSMUSG00000026082	Rev1	chr1	-	38074314	38075023	0.0942003	0.857229
																		ENSMUSG00000032067	Pts	chr9	-	50525261	50525284	3.31949e-05	0.00479946		ENSMUSG00000066456	Hmgn3	chr9	-	83109947	83111106	0.0942534	0.857229
																		ENSMUSG00000032185	Carm1	chr9	+	21574893	21575014	3.34582e-05	0.00479946		ENSMUSG00000039449	Prpf18	chr2	-	4637147	4638995	0.100115	0.90767
																		ENSMUSG00000030254	Rad18	chr6	-	112628461	112628524	3.35665e-05	0.00479946		ENSMUSG00000057110	Cntrl	chr2	+	35175537	35176322	0.100853	0.911483
																		ENSMUSG00000034071	Zfp551	chr7	-	12418542	12418666	3.3225e-05	0.00479946		ENSMUSG00000035478	Mbd3	chr10	-	80392538	80393280	0.101762	0.913177
																		ENSMUSG00000039929	Urb1	chr16	-	90776124	90776304	3.31915e-05	0.00479946		ENSMUSG00000024160	Spsb3	chr17	+	24890832	24891136	0.102125	0.913177
																		ENSMUSG00000049550	Clip1	chr5	-	123635173	123635278	3.50047e-05	0.00495204		ENSMUSG00000006215	Zbtb17	chr4	+	141464236	141464702	0.102311	0.913177
																		ENSMUSG00000005936	Kctd20	chr17	+	28957878	28958057	3.50175e-05	0.00495204		ENSMUSG00000033769	Exoc6b	chr6	-	85003047	85003285	0.101793	0.913177
																		ENSMUSG00000030301	Ccdc91	chr6	+	147533275	147533363	3.51351e-05	0.00495329		ENSMUSG00000038344	Txlng	chrX	-	162811291	162811595	0.104148	0.92669
																		ENSMUSG00000056211	R3hdm1	chr1	+	128184399	128184654	3.57077e-05	0.00501848		ENSMUSG00000028948	Nol9	chr4	+	152045694	152046644	0.104557	0.927458
																		ENSMUSG00000017802	Retreg3	chr11	-	101099007	101099140	3.60731e-05	0.00505422		ENSMUSG00000021466	Ptch1	chr13	-	63533263	63533666	0.105156	0.929904
																		ENSMUSG00000015937	H2afy	chr13	-	56089757	56089857	3.92234e-05	0.00546069		ENSMUSG00000037552	Plekhg2	chr7	-	28364470	28364632	0.105927	0.933852
																		ENSMUSG00000079659	Tmem243	chr5	+	9117458	9117563	3.93385e-05	0.00546069		ENSMUSG00000034917	Tjp3	chr10	-	81283495	81283739	0.106528	0.936275
																		ENSMUSG00000038848	Ythdf1	chr2	-	180910686	180912207	3.94538e-05	0.00546069		ENSMUSG00000060601	Nr1h2	chr7	-	44551954	44552620	0.107359	0.940698
																		ENSMUSG00000054793	Cadm4	chr7	+	24500475	24500640	3.934e-05	0.00546069		ENSMUSG00000089847	Timm10b	chr7	+	105640761	105641228	0.111427	0.973377
																		ENSMUSG00000007570	Fance	chr17	+	28323570	28323665	4.01035e-05	0.0055338		ENSMUSG00000039263	Npepl1	chr2	+	174120543	174121124	0.11259	0.977591
																		ENSMUSG00000006024	Napa	chr7	+	16113111	16113189	4.05917e-05	0.00558425		ENSMUSG00000038679	Trps1	chr15	-	50830828	50831958	0.112456	0.977591
																		ENSMUSG00000031596	Slc7a2	chr8	+	40908397	40908534	4.10229e-05	0.00562657		ENSMUSG00000030815	Phkg2	chr7	+	127577534	127578029	0.113491	0.982452
																		ENSMUSG00000060510	Zfp266	chr9	-	20521019	20521119	4.15065e-05	0.0056758		ENSMUSG00000031505	Naxd	chr8	+	11509321	11509557	0.114269	0.983263
																		ENSMUSG00000030852	Tacc2	chr7	+	130589969	130590026	4.19993e-05	0.00572599		ENSMUSG00000028959	Fastk	chr5	-	24441527	24441823	0.113944	0.983263
																		ENSMUSG00000035266	Helq	chr5	-	100766687	100766801	4.29677e-05	0.00584053		ENSMUSG00000019467	Arhgef25	chr10	-	127185082	127185678	0.115096	0.987423
																		ENSMUSG00000041674	BC006965	chr11	-	112691291	112691435	4.33969e-05	0.00588131		ENSMUSG00000053453	Thoc7	chr14	-	13953410	13954656	0.116318	0.992734
																		ENSMUSG00000032067	Pts	chr9	-	50526869	50526949	4.37069e-05	0.00590575		ENSMUSG00000053332	Gas5	chr1	+	161036819	161037164	0.116543	0.992734
																		ENSMUSG00000026701	Prdx6	chr1	-	161247256	161247413	4.38616e-05	0.00590911		ENSMUSG00000028059	Arhgef2	chr3	+	88632912	88633367	0.11718	0.992734
																		ENSMUSG00000021981	Cab39l	chr14	+	59479043	59479184	4.52206e-05	0.00607423		ENSMUSG00000037761	Actr5	chr2	+	158635306	158636147	0.117123	0.992734
																		ENSMUSG00000040785	Ttc3	chr16	+	94387336	94387390	4.70393e-05	0.00629995		ENSMUSG00000038335	Tsr1	chr11	+	74907823	74908120	0.117442	0.992734
																		ENSMUSG00000002968	Med25	chr7	-	44880566	44880638	4.71847e-05	0.00630089		ENSMUSG00000031805	Jak3	chr8	+	71680639	71680994	0.118592	0.999514
																		ENSMUSG00000020190	Mknk2	chr10	-	80671927	80672015	4.77811e-05	0.00636188		ENSMUSG00000028464	Tpm2	chr4	-	43518401	43519078	1	1
																		ENSMUSG00000001247	Lsr	chr7	-	30965968	30966088	4.84877e-05	0.00643713		ENSMUSG00000025144	Cenpx	chr11	-	120711702	120711895	0.410306	1
																		ENSMUSG00000019977	Hbs1l	chr10	+	21309098	21309314	4.87731e-05	0.00645619		ENSMUSG00000021670	Hmgcr	chr13	-	96664761	96665897	1	1
																		ENSMUSG00000002205	Vrk3	chr7	+	44775375	44775535	5.05445e-05	0.0066441		ENSMUSG00000042396	Rbm7	chr9	-	48488700	48490938	1	1
																		ENSMUSG00000019969	Psen1	chr12	+	83699354	83699421	5.06303e-05	0.0066441		ENSMUSG00000025474	Tubgcp2	chr7	-	140004798	140005450	0.186098	1
																		ENSMUSG00000042507	Elmsan1	chr12	-	84154894	84155107	5.03441e-05	0.0066441		ENSMUSG00000040345	Arhgap9	chr10	+	127326552	127327014	1	1
																		ENSMUSG00000041674	BC006965	chr11	-	112669200	112669327	5.14639e-05	0.00673408		ENSMUSG00000079334	Nat6	chr9	+	107579099	107580935	1	1
																		ENSMUSG00000038828	Tmem214	chr5	+	30872860	30872904	5.19104e-05	0.00677305		ENSMUSG00000031985	Gnpat	chr8	+	124886682	124886946	0.677691	1
																		ENSMUSG00000034354	Mtmr3	chr11	-	4546188	4546268	5.34625e-05	0.00691611		ENSMUSG00000030795	Fus	chr7	+	127972553	127975920	0.710209	1
																		ENSMUSG00000032498	Mlh1	chr9	-	111252863	111252976	5.32095e-05	0.00691611		ENSMUSG00000022617	Chkb	chr15	-	89428133	89428827	0.250026	1
																		ENSMUSG00000060373	Hnrnpc	chr14	-	52098014	52098040	5.34054e-05	0.00691611		ENSMUSG00000022617	Chkb	chr15	-	89428133	89428827	1	1
																		ENSMUSG00000109841	E330011O21Rik	chr16	-	78253436	78253467	5.39633e-05	0.00696112		ENSMUSG00000022617	Chkb	chr15	-	89428410	89428827	0.204437	1
																		ENSMUSG00000021000	Mia2	chr12	+	59146335	59146362	5.49133e-05	0.00706365		ENSMUSG00000022617	Chkb	chr15	-	89428410	89428827	0.747097	1
																		ENSMUSG00000032599	Ip6k2	chr9	+	108796540	108796572	5.53025e-05	0.00709367		ENSMUSG00000036138	Acaa1a	chr9	+	119344465	119346568	1	1
																		ENSMUSG00000074272	Ceacam1	chr7	-	25466316	25466437	5.56414e-05	0.0071171		ENSMUSG00000020883	Fbxl20	chr11	-	98095132	98097059	1	1
																		ENSMUSG00000074513	Arfip1	chr3	-	84529169	84529265	5.62875e-05	0.00717958		ENSMUSG00000020486	2018-09-04	chr11	+	87583317	87584014	1	1
																		ENSMUSG00000022635	Zcrb1	chr15	-	93393706	93393764	5.76024e-05	0.00732677		ENSMUSG00000020486	2018-09-04	chr11	+	87588717	87589085	1	1
																		ENSMUSG00000021280	Exoc3l4	chr12	+	111417688	111417754	5.91157e-05	0.00749831		ENSMUSG00000020486	2018-09-04	chr11	+	87589655	87590055	1	1
																		ENSMUSG00000066735	Vkorc1l1	chr5	+	129978518	129978628	5.96987e-05	0.00755122		ENSMUSG00000008690	Ncaph2	chr15	+	89363604	89363834	1	1
																		ENSMUSG00000022995	Enah	chr1	-	181911596	181911659	6.03754e-05	0.00761566		ENSMUSG00000008690	Ncaph2	chr15	+	89370394	89370675	1	1
																		ENSMUSG00000028329	Xpa	chr4	-	46180206	46180398	6.07642e-05	0.00762248		ENSMUSG00000008690	Ncaph2	chr15	+	89370394	89370675	1	1
																		ENSMUSG00000079509	Zfx	chrX	-	94082149	94082299	6.06714e-05	0.00762248		ENSMUSG00000008690	Ncaph2	chr15	+	89370752	89370993	1	1
																		ENSMUSG00000005968	Tuft1	chr3	-	94639386	94639469	6.13577e-05	0.00767578		ENSMUSG00000062006	Rpl34	chr3	-	130729050	130729302	1	1
																		ENSMUSG00000052560	Cpne8	chr15	-	90601812	90601889	6.22552e-05	0.00776672		ENSMUSG00000034187	Nsf	chr11	-	103913315	103913908	1	1
																		ENSMUSG00000022905	Kpna1	chr16	+	36015886	36016009	6.31433e-05	0.00785599		ENSMUSG00000075232	Amd1	chr10	-	40290117	40290615	1	1
																		ENSMUSG00000035139	Secisbp2	chr13	+	51654495	51654635	6.36468e-05	0.00789705		ENSMUSG00000001524	Gtf2h4	chr17	-	35670656	35670962	1	1
																		ENSMUSG00000020758	Itgb4	chr11	+	116005896	116006055	6.41932e-05	0.00794321		ENSMUSG00000027610	Gss	chr2	-	155566802	155567887	1	1
																		ENSMUSG00000026341	Actr3	chr1	-	125397451	125397544	6.51993e-05	0.00804585		ENSMUSG00000027610	Gss	chr2	-	155578288	155578787	1	1
																		ENSMUSG00000004677	Myo9b	chr8	+	71358615	71358663	6.61029e-05	0.00806987		ENSMUSG00000022884	Eif4a2	chr16	+	23108587	23108851	1	1
																		ENSMUSG00000030660	Pik3c2a	chr7	-	116405859	116405963	6.57052e-05	0.00806987		ENSMUSG00000022884	Eif4a2	chr16	+	23109984	23110343	0.861068	1
																		ENSMUSG00000021280	Exoc3l4	chr12	+	111417661	111417754	6.59512e-05	0.00806987		ENSMUSG00000022884	Eif4a2	chr16	+	23110579	23111263	0.191988	1
																		ENSMUSG00000015092	Edf1	chr2	+	25560968	25561062	6.57539e-05	0.00806987		ENSMUSG00000022884	Eif4a2	chr16	+	23111125	23111592	0.710458	1
																		ENSMUSG00000018347	Zkscan6	chr11	+	65816488	65816580	6.66875e-05	0.00811947		ENSMUSG00000026048	Ercc5	chr1	+	44173337	44174031	1	1
																		ENSMUSG00000001419	Mef2d	chr3	+	88158033	88158171	6.74378e-05	0.00818893		ENSMUSG00000054065	Pkp3	chr7	+	141088283	141088651	1	1
																		ENSMUSG00000017715	Pgs1	chr11	+	118014573	118014722	6.77922e-05	0.00821006		ENSMUSG00000042328	Hps4	chr5	+	112369454	112370744	1	1
																		ENSMUSG00000006356	Crip2	chr12	+	113143458	113143611	6.95926e-05	0.00840576		ENSMUSG00000032580	Rbm5	chr9	-	107751718	107751953	1	1
																		ENSMUSG00000074272	Ceacam1	chr7	-	25464848	25464880	7.06039e-05	0.00846058		ENSMUSG00000011877	Git1	chr11	+	77503355	77504018	1	1
																		ENSMUSG00000026150	Mff	chr1	+	82745523	82745556	7.04676e-05	0.00846058		ENSMUSG00000011877	Git1	chr11	+	77505503	77505753	1	1
																		ENSMUSG00000041740	Rnf10	chr5	-	115248914	115249173	7.04507e-05	0.00846058		ENSMUSG00000079197	Psme2	chr14	-	55587653	55588094	0.222864	1
																		ENSMUSG00000035382	Pcsk7	chr9	+	45927036	45927118	7.12671e-05	0.00849534		ENSMUSG00000079197	Psme2	chr14	-	55589480	55589705	0.517889	1
																		ENSMUSG00000041740	Rnf10	chr5	-	115248914	115249170	7.1144e-05	0.00849534		ENSMUSG00000053907	Mat2a	chr6	-	72432798	72435114	1	1
																		ENSMUSG00000031516	Dctn6	chr8	-	34104985	34105039	7.15031e-05	0.00850122		ENSMUSG00000053907	Mat2a	chr6	-	72436994	72437448	1	1
																		ENSMUSG00000032530	Lyzl4	chr9	-	121584071	121584221	7.27664e-05	0.00862888		ENSMUSG00000036281	Snapc4	chr2	-	26372730	26373080	1	1
																		ENSMUSG00000027620	Rbm39	chr2	-	156174096	156174168	7.31768e-05	0.00865501		ENSMUSG00000036281	Snapc4	chr2	-	26373318	26374185	0.191564	1
																		ENSMUSG00000017664	Slc35c2	chr2	-	165280785	165280954	7.37264e-05	0.00869743		ENSMUSG00000070034	Sp110	chr1	-	85579056	85579745	1	1
																		ENSMUSG00000018417	Myo1b	chr1	-	51768649	51768736	7.40945e-05	0.00871826		ENSMUSG00000070034	Sp110	chr1	-	85584902	85586295	1	1
																		ENSMUSG00000042510	AA986860	chr1	+	130741002	130741183	7.50473e-05	0.00880761		ENSMUSG00000042487	Leo1	chr9	+	75447101	75448396	1	1
																		ENSMUSG00000020253	Ppm1m	chr9	-	106197226	106197339	7.55051e-05	0.00883856		ENSMUSG00000042487	Leo1	chr9	+	75455640	75457193	1	1
																		ENSMUSG00000053453	Thoc7	chr14	-	13957459	13957631	7.62468e-05	0.0089025		ENSMUSG00000078762	Haus5	chr7	-	30659062	30659413	0.696851	1
																		ENSMUSG00000004270	Lpcat3	chr6	+	124699238	124699345	7.65559e-05	0.00891573		ENSMUSG00000074272	Ceacam1	chr7	-	25464848	25466437	1	1
																		ENSMUSG00000056763	Cspp1	chr1	+	10059823	10059847	7.8618e-05	0.00913252		ENSMUSG00000053553	3110082I17Rik	chr5	-	139359738	139361388	1	1
																		ENSMUSG00000028789	Azin2	chr4	-	128959783	128959957	7.92285e-05	0.00918002		ENSMUSG00000046364	Rpl27a	chr7	+	109519584	109519993	1	1
																		ENSMUSG00000038943	Prc1	chr7	+	80313526	80313568	7.96721e-05	0.00920799		ENSMUSG00000032553	Srprb	chr9	-	103197537	103198866	1	1
																		ENSMUSG00000036352	Ubac1	chr2	-	26008860	26008969	8.05419e-05	0.00926556		ENSMUSG00000036529	Sbf1	chr15	-	89301842	89302377	0.407089	1
																		ENSMUSG00000026254	Eif4e2	chr1	+	87232402	87232481	8.05772e-05	0.00926556		ENSMUSG00000014856	Tmem208	chr8	+	105328321	105328692	0.376439	1
																		ENSMUSG00000005087	Cd44	chr2	-	102848656	102848782	8.19032e-05	0.00939431		ENSMUSG00000014856	Tmem208	chr8	+	105328321	105328692	0.623053	1
																		ENSMUSG00000024665	Fads2	chr19	-	10066514	10066612	8.25307e-05	0.00944251		ENSMUSG00000031398	Plxna3	chrX	+	74333745	74334348	1	1
																		ENSMUSG00000037876	Jmjd1c	chr10	+	67189735	67189849	8.44101e-05	0.00963333		ENSMUSG00000031398	Plxna3	chrX	+	74335042	74335498	0.767703	1
																		ENSMUSG00000032633	Flcn	chr11	-	59809364	59809485	8.61538e-05	0.00980774		ENSMUSG00000031398	Plxna3	chrX	+	74335769	74336191	1	1
																		ENSMUSG00000062328	Rpl17	chr18	+	75001349	75001390	8.70821e-05	0.0098887		ENSMUSG00000040054	Baz2a	chr10	+	128115024	128116169	0.830631	1
																		ENSMUSG00000026159	Agfg1	chr1	+	82886374	82886467	8.91795e-05	0.0101017		ENSMUSG00000026782	Abi2	chr1	+	60437055	60438959	1	1
																		ENSMUSG00000034639	Setmar	chr6	+	108072966	108073119	9.00824e-05	0.0101786		ENSMUSG00000027667	Zfp639	chr3	+	32515283	32517139	0.847383	1
																		ENSMUSG00000028760	Eif4g3	chr4	+	138087532	138087565	9.10352e-05	0.0102355		ENSMUSG00000003226	Ranbp2	chr10	+	58455218	58455954	0.667398	1
																		ENSMUSG00000027799	Nbea	chr3	-	55994047	55994056	9.08414e-05	0.0102355		ENSMUSG00000039220	Ppp1r10	chr17	+	35927909	35928329	1	1
																		ENSMUSG00000032092	Mpzl2	chr9	+	45042610	45042794	9.32211e-05	0.0104429		ENSMUSG00000031388	Naa10	chrX	-	73919501	73919869	0.575413	1
																		ENSMUSG00000031078	Cttn	chr7	-	144450977	144451088	9.35682e-05	0.0104429		ENSMUSG00000063268	Parp10	chr15	-	76241657	76242639	1	1
																		ENSMUSG00000000538	Tom1l2	chr11	-	60261054	60261213	9.35573e-05	0.0104429		ENSMUSG00000022978	Mis18a	chr16	-	90719311	90720750	1	1
																		ENSMUSG00000029860	Zyx	chr6	+	42351269	42351362	9.46505e-05	0.0105379		ENSMUSG00000022978	Mis18a	chr16	-	90726292	90727404	1	1
																		ENSMUSG00000022091	Sorbs3	chr14	-	70191147	70191200	9.71498e-05	0.0107898		ENSMUSG00000024818	Slc25a45	chr19	+	5884344	5885766	1	1
																		ENSMUSG00000021638	Ocln	chr13	-	100539260	100539933	0.000101348	0.0112287		ENSMUSG00000021486	Prelid1	chr13	+	55324330	55324605	1	1
																		ENSMUSG00000031342	Gpm6b	chrX	+	166353564	166353684	0.000103498	0.0114391		ENSMUSG00000031232	Magt1	chrX	-	105968083	105971479	0.716614	1
																		ENSMUSG00000025498	Irf7	chr7	-	141264492	141264655	0.000104126	0.0114806		ENSMUSG00000040599	Mis12	chr11	+	71019610	71020189	1	1
																		ENSMUSG00000024970	Spindoc	chr19	-	7374520	7374850	0.000104598	0.0114885		ENSMUSG00000022620	Arsa	chr15	-	89474539	89475005	1	1
																		ENSMUSG00000038121	Fam210a	chr18	-	68279266	68279428	0.000104703	0.0114885		ENSMUSG00000015377	Dennd6b	chr15	-	89185361	89185647	1	1
																		ENSMUSG00000053007	Creb5	chr6	+	53685292	53685520	0.000110486	0.0120939		ENSMUSG00000015377	Dennd6b	chr15	-	89185361	89186047	1	1
																		ENSMUSG00000041757	Plekha6	chr1	+	133280338	133280407	0.000111143	0.0121367		ENSMUSG00000015377	Dennd6b	chr15	-	89186171	89186819	1	1
																		ENSMUSG00000034269	Setd5	chr6	+	113110084	113110221	0.0001122	0.0122228		ENSMUSG00000015377	Dennd6b	chr15	-	89186171	89186819	1	1
																		ENSMUSG00000024098	Twsg1	chr17	-	65937800	65937900	0.00011308	0.0122893		ENSMUSG00000015377	Dennd6b	chr15	-	89186362	89186819	1	1
																		ENSMUSG00000022890	Atp5j	chr16	-	84833819	84833874	0.000113865	0.0123451		ENSMUSG00000015377	Dennd6b	chr15	-	89186362	89187243	1	1
																		ENSMUSG00000044456	Rin3	chr12	+	102325794	102325912	0.000114154	0.0123471		ENSMUSG00000015377	Dennd6b	chr15	-	89186955	89187243	0.250151	1
																		ENSMUSG00000005087	Cd44	chr2	-	102837812	102837938	0.000115775	0.0124928		ENSMUSG00000063800	Prpf38a	chr4	-	108568357	108570266	1	1
																		ENSMUSG00000039531	Zufsp	chr10	-	33935088	33935257	0.000116482	0.0125393		ENSMUSG00000003863	Ppfia3	chr7	-	45340574	45340986	1	1
																		ENSMUSG00000031736	Crnde	chr8	-	92344852	92345039	0.000118724	0.0127205		ENSMUSG00000079179	Rab10os	chr12	+	3235525	3237412	1	1
																		ENSMUSG00000030688	Stard10	chr7	+	101343183	101343287	0.000118695	0.0127205		ENSMUSG00000031601	Cnot7	chr8	-	40499294	40500913	1	1
																		ENSMUSG00000057469	E2f6	chr12	+	16824569	16824717	0.000119135	0.0127346		ENSMUSG00000063704	Mapk15	chr15	+	75998549	75999154	1	1
																		ENSMUSG00000041215	Yeats2	chr16	+	20229497	20229571	0.000120897	0.0128927		ENSMUSG00000027889	Ampd2	chr3	-	108079184	108079773	0.865346	1
																		ENSMUSG00000041126	H2afv	chr11	-	6433723	6433837	0.000125206	0.013321		ENSMUSG00000027889	Ampd2	chr3	-	108080266	108080774	0.262581	1
																		ENSMUSG00000030689	Ino80e	chr7	-	126853488	126853580	0.000125519	0.0133232		ENSMUSG00000022515	Anks3	chr16	-	4947648	4948363	1	1
																		ENSMUSG00000005087	Cd44	chr2	-	102848656	102848782	0.000126437	0.0133894		ENSMUSG00000015093	Clic3	chr2	+	25457660	25457974	1	1
																		ENSMUSG00000038943	Prc1	chr7	+	80313529	80313568	0.000128544	0.0135809		ENSMUSG00000030357	Fkbp4	chr6	-	128433525	128433793	1	1
																		ENSMUSG00000038762	Abcf1	chr17	-	35963125	35963392	0.000130265	0.0137309		ENSMUSG00000027297	Ltk	chr2	-	119752065	119752598	1	1
																		ENSMUSG00000035547	Capn5	chr7	-	98125828	98125944	0.00013178	0.0138585		ENSMUSG00000053877	Srcap	chr7	+	127519580	127519832	1	1
																		ENSMUSG00000019961	Tmpo	chr10	-	91153277	91153397	0.00013276	0.0139294		ENSMUSG00000053877	Srcap	chr7	+	127521475	127521661	1	1
																		ENSMUSG00000043284	Tmem11	chr11	-	60875759	60876047	0.000133764	0.0139704		ENSMUSG00000055491	Pprc1	chr19	+	46072182	46072801	1	1
																		ENSMUSG00000030352	Tspan9	chr6	-	128078026	128078126	0.0001337	0.0139704		ENSMUSG00000004455	Ppp1cc	chr5	+	122172731	122173280	0.818475	1
																		ENSMUSG00000026313	Hdac4	chr1	-	91945899	91946033	0.000136195	0.0141917		ENSMUSG00000004455	Ppp1cc	chr5	+	122172731	122173280	0.87901	1
																		ENSMUSG00000049606	Zfp644	chr5	-	106690670	106690877	0.000138299	0.0143453		ENSMUSG00000033964	Zbtb41	chr1	+	139429125	139429333	1	1
																		ENSMUSG00000021809	Nudt13	chr14	+	20300586	20300679	0.000138097	0.0143453		ENSMUSG00000001622	Csn3	chr5	+	87927571	87929254	1	1
																		ENSMUSG00000045962	Wnk1	chr6	-	119962396	119963632	0.000138894	0.0143743		ENSMUSG00000034525	Ice1	chr13	-	70618984	70620769	1	1
																		ENSMUSG00000070643	Sox13	chr1	-	133384456	133384673	0.000139461	0.0144002		ENSMUSG00000028845	Tekt2	chr4	-	126324229	126324719	1	1
																		ENSMUSG00000031631	Cfap97	chr8	+	46164761	46164896	0.000141421	0.0145696		ENSMUSG00000038685	Rtel1	chr2	+	181351575	181351953	1	1
																		ENSMUSG00000032372	Plscr2	chr9	+	92281240	92281783	0.000142935	0.014637		ENSMUSG00000038685	Rtel1	chr2	+	181354352	181355552	1	1
																		ENSMUSG00000021027	Ralgapa1	chr12	-	55612072	55612103	0.000142469	0.014637		ENSMUSG00000034116	Vav1	chr17	+	57279099	57279401	1	1
																		ENSMUSG00000109324	Prmt1	chr7	-	44983734	44983875	0.000143254	0.014637		ENSMUSG00000039254	Pomt1	chr2	+	32241652	32243004	1	1
																		ENSMUSG00000008140	Emc10	chr7	-	44491162	44491249	0.000143362	0.014637		ENSMUSG00000039254	Pomt1	chr2	+	32243618	32244389	0.720662	1
																		ENSMUSG00000107478	Gm45234	chr6	-	124743747	124743891	0.000146494	0.0149234		ENSMUSG00000037742	Eef1a1	chr9	-	78478957	78479534	0.337131	1
																		ENSMUSG00000074513	Arfip1	chr3	-	84529190	84529265	0.000147065	0.0149481		ENSMUSG00000037742	Eef1a1	chr9	-	78479277	78479774	1	1
																		ENSMUSG00000003123	Lipe	chr7	-	25384361	25384664	0.000147873	0.0149968		ENSMUSG00000034664	Itga2b	chr11	-	102457459	102457852	1	1
																		ENSMUSG00000014547	Wdfy2	chr14	+	62953011	62953142	0.000148914	0.0150688		ENSMUSG00000034664	Itga2b	chr11	-	102464939	102465357	1	1
																		ENSMUSG00000048832	Vps37c	chr19	+	10710269	10710441	0.000150028	0.0151478		ENSMUSG00000027655	Dhx35	chr2	+	158826304	158827999	1	1
																		ENSMUSG00000040046	Tph1	chr7	-	46652857	46652984	0.000153094	0.0154232		ENSMUSG00000020284	1810043G02Rik	chr10	+	77979752	77980547	0.751184	1
																		ENSMUSG00000060147	Serpinb6a	chr13	-	33935626	33935794	0.000154347	0.0155151		ENSMUSG00000020284	1810043G02Rik	chr10	+	77979752	77983041	0.669711	1
																		ENSMUSG00000042472	Zfp410	chr12	+	84332934	84333024	0.000155156	0.0155621		ENSMUSG00000041459	Tardbp	chr4	-	148612381	148618791	1	1
																		ENSMUSG00000038167	Plekhg6	chr6	-	125379754	125379976	0.000156743	0.0156867		ENSMUSG00000041459	Tardbp	chr4	-	148612381	148618791	0.583308	1
																		ENSMUSG00000028788	Ptp4a2	chr4	+	129846464	129846539	0.000158911	0.0158688		ENSMUSG00000037916	Ndufv1	chr19	-	4011101	4011424	1	1
																		ENSMUSG00000038619	Ensa	chr3	+	95626748	95626874	0.000162237	0.0161655		ENSMUSG00000026709	Dars2	chr1	-	161044958	161045476	0.130624	1
																		ENSMUSG00000025812	Pard3	chr8	+	127410728	127410773	0.000164136	0.016319		ENSMUSG00000042066	Tmcc2	chr1	-	132358902	132361215	0.806786	1
																		ENSMUSG00000021638	Ocln	chr13	-	100541067	100541184	0.00016596	0.0163833		ENSMUSG00000031161	Hdac6	chrX	-	7938385	7939665	1	1
																		ENSMUSG00000031819	Emc8	chr8	-	120658551	120658622	0.000165679	0.0163833		ENSMUSG00000023885	Thbs2	chr17	-	14668724	14670069	1	1
																		ENSMUSG00000026821	Ralgds	chr2	+	28543638	28543747	0.000165417	0.0163833		ENSMUSG00000022960	Donson	chr16	-	91682515	91682821	1	1
																		ENSMUSG00000035165	Kcne3	chr7	+	100181150	100181274	0.000166222	0.0163833		ENSMUSG00000025494	Sigirr	chr7	-	141091174	141091992	0.211138	1
																		ENSMUSG00000018677	Slc25a39	chr11	-	102405692	102405802	0.000168596	0.0165814		ENSMUSG00000025494	Sigirr	chr7	-	141092977	141093330	0.345175	1
																		ENSMUSG00000109324	Prmt1	chr7	-	44983770	44984133	0.0001691	0.0165952		ENSMUSG00000031783	Polr2c	chr8	+	94862520	94862884	1	1
																		ENSMUSG00000037887	Dusp8	chr7	-	142089943	142090266	0.000171593	0.0168036		ENSMUSG00000042745	Id1	chr2	+	152736250	152737410	0.58806	1
																		ENSMUSG00000030533	Unc45a	chr7	-	80328452	80328519	0.000173312	0.0168992		ENSMUSG00000068922	Msto1	chr3	-	88910625	88911014	1	1
																		ENSMUSG00000078861	Zfp931	chr2	-	178069554	178069615	0.000173021	0.0168992		ENSMUSG00000025188	Hps1	chr19	-	42756257	42757906	1	1
																		ENSMUSG00000041733	Coq5	chr5	+	115294826	115294915	0.000175031	0.0170304		ENSMUSG00000026360	Rgs2	chr1	-	144002779	144003053	0.642703	1
																		ENSMUSG00000026049	Tex30	chr1	-	44093263	44093317	0.000177671	0.0171771		ENSMUSG00000020781	Tsen54	chr11	+	115814914	115815238	1	1
																		ENSMUSG00000003464	Pex19	chr1	+	172128630	172128740	0.000177351	0.0171771		ENSMUSG00000020832	Eral1	chr11	-	78074279	78074627	0.134319	1
																		ENSMUSG00000070003	Ssbp4	chr8	-	70600008	70600062	0.000177398	0.0171771		ENSMUSG00000030894	Tpp1	chr7	-	105750179	105751729	0.962707	1
																		ENSMUSG00000037971	1110032A03Rik	chr9	-	50764695	50764926	0.000179182	0.0172865		ENSMUSG00000030894	Tpp1	chr7	-	105751981	105752196	0.126785	1
																		ENSMUSG00000000738	Spg7	chr8	+	123083821	123083943	0.000181312	0.0174182		ENSMUSG00000021868	Ppif	chr14	+	25696003	25698341	0.240239	1
																		ENSMUSG00000030852	Tacc2	chr7	+	130627397	130627499	0.000181238	0.0174182		ENSMUSG00000023411	Nfatc4	chr14	+	55830268	55831708	1	1
																		ENSMUSG00000007570	Fance	chr17	+	28323570	28323665	0.000182674	0.0175121		ENSMUSG00000023411	Nfatc4	chr14	+	55832222	55833624	1	1
																		ENSMUSG00000026341	Actr3	chr1	-	125397106	125397232	0.000185619	0.0176875		ENSMUSG00000058427	Cxcl2	chr5	+	90904356	90905938	0.167878	1
																		ENSMUSG00000025199	Chuk	chr19	-	44086907	44087059	0.000185091	0.0176875		ENSMUSG00000033857	Engase	chr11	+	118485756	118486553	1	1
																		ENSMUSG00000029063	Nadk	chr4	+	155576992	155577197	0.000185669	0.0176875		ENSMUSG00000033857	Engase	chr11	+	118485756	118486553	1	1
																		ENSMUSG00000026740	Dnajc1	chr2	-	18308783	18308949	0.000187685	0.0178423		ENSMUSG00000090626	Tex9	chr9	-	72491738	72491956	1	1
																		ENSMUSG00000007411	Mark3	chr12	+	111628961	111629115	0.000190039	0.0180284		ENSMUSG00000026553	Copa	chr1	+	172091163	172092354	0.942536	1
																		ENSMUSG00000026643	Nmt2	chr2	+	3305396	3305439	0.000192004	0.0181392		ENSMUSG00000023393	Slc17a9	chr2	+	180731879	180732572	1	1
																		ENSMUSG00000087177	E130307A14Rik	chr10	-	39645555	39645808	0.000191691	0.0181392		ENSMUSG00000023393	Slc17a9	chr2	+	180731879	180732572	1	1
																		ENSMUSG00000028455	Stoml2	chr4	-	43030435	43030535	0.000194413	0.0183287		ENSMUSG00000026848	Tor1b	chr2	+	30953751	30955953	0.654249	1
																		ENSMUSG00000040712	Camta2	chr11	-	70683278	70683365	0.000196027	0.0183291		ENSMUSG00000026848	Tor1b	chr2	+	30953751	30955953	1	1
																		ENSMUSG00000054405	Dnajc8	chr4	+	132535982	132536146	0.000195889	0.0183291		ENSMUSG00000026848	Tor1b	chr2	+	30953751	30955953	1	1
																		ENSMUSG00000034341	Wbp2	chr11	-	116080545	116080680	0.00019545	0.0183291		ENSMUSG00000026083	Eif5b	chr1	+	38033067	38034103	1	1
																		ENSMUSG00000032109	Nlrx1	chr9	-	44255430	44255517	0.000195533	0.0183291		ENSMUSG00000026083	Eif5b	chr1	+	38050186	38051284	1	1
																		ENSMUSG00000027940	Tpm3	chr3	+	90091012	90091091	0.000199964	0.0185828		ENSMUSG00000024871	Doc2g	chr19	+	4004322	4004648	1	1
																		ENSMUSG00000039275	Foxk2	chr11	+	121296028	121296222	0.000199825	0.0185828		ENSMUSG00000022214	Dcaf11	chr14	+	55565097	55565541	1	1
																		ENSMUSG00000010721	Lmbr1	chr5	-	29323801	29323824	0.000199394	0.0185828		ENSMUSG00000021234	Fam161b	chr12	-	84355923	84357850	1	1
																		ENSMUSG00000055762	Eef1d	chr15	-	75900690	75900762	0.000204516	0.0189671		ENSMUSG00000027981	Rnpc3	chr3	-	113605066	113608411	1	1
																		ENSMUSG00000052407	Ccdc171	chr4	+	83620824	83620963	0.000205236	0.0189952		ENSMUSG00000008206	Cers4	chr8	+	4519462	4520308	1	1
																		ENSMUSG00000106918	Mrpl33	chr5	+	31629615	31629720	0.000206152	0.0190027		ENSMUSG00000008206	Cers4	chr8	+	4519462	4520682	1	1
																		ENSMUSG00000021411	Pxdc1	chr13	-	34638164	34638282	0.000205807	0.0190027		ENSMUSG00000061232	H2-K1	chr17	-	33996826	33997157	0.3495	1
																		ENSMUSG00000037447	Arid5a	chr1	+	36318487	36318653	0.000206879	0.0190312		ENSMUSG00000037446	Tulp1	chr17	-	28359061	28359324	1	1
																		ENSMUSG00000029048	Rer1	chr4	-	155083108	155083317	0.000207382	0.019039		ENSMUSG00000029670	Ing3	chr6	+	21969277	21970107	0.952705	1
																		ENSMUSG00000041769	Ppp2r2d	chr7	+	138848458	138848665	0.000208027	0.0190598		ENSMUSG00000036073	Galt	chr4	+	41756512	41756995	1	1
																		ENSMUSG00000031229	Atrx	chrX	-	105911469	105911654	0.000209208	0.0191295		ENSMUSG00000036073	Galt	chr4	+	41758083	41758695	0.913528	1
																		ENSMUSG00000068115	Ninl	chr2	-	150969979	150970132	0.000211379	0.0192122		ENSMUSG00000037791	Phf12	chr11	+	78024812	78025086	1	1
																		ENSMUSG00000027463	Slc52a3	chr2	+	152005531	152006019	0.000211276	0.0192122		ENSMUSG00000037791	Phf12	chr11	+	78024812	78025086	0.771087	1
																		ENSMUSG00000026034	Clk1	chr1	-	58417012	58417179	0.000211225	0.0192122		ENSMUSG00000041506	Rrp9	chr9	+	106482911	106483211	0.50244	1
																		ENSMUSG00000033335	Dnm2	chr9	+	21490657	21490669	0.000213846	0.0193978		ENSMUSG00000028670	Lypla2	chr4	-	135969427	135969674	0.7623	1
																		ENSMUSG00000041674	BC006965	chr11	-	112680921	112680950	0.000214833	0.0194486		ENSMUSG00000052142	Rasal3	chr17	-	32403055	32403581	1	1
																		ENSMUSG00000024436	Mrps18b	chr17	-	35914491	35914589	0.00022088	0.0198894		ENSMUSG00000001249	Hpn	chr7	-	31103153	31103423	1	1
																		ENSMUSG00000035325	Sec31a	chr5	-	100388533	100388611	0.000220953	0.0198894		ENSMUSG00000058503	Fam133b	chr5	+	3558660	3559159	0.820061	1
																		ENSMUSG00000031618	Nr3c2	chr8	+	76906592	76906623	0.000221013	0.0198894		ENSMUSG00000058503	Fam133b	chr5	+	3558660	3559159	1	1
																		ENSMUSG00000035165	Kcne3	chr7	+	100182991	100183074	0.000223828	0.020103		ENSMUSG00000036466	Megf11	chr9	+	64705726	64709205	1	1
																		ENSMUSG00000046311	Zfp62	chr11	+	49214525	49214654	0.000226305	0.0202457		ENSMUSG00000040459	Arglu1	chr8	-	8681383	8683973	0.440166	1
																		ENSMUSG00000071226	Cecr2	chr6	+	120743782	120743866	0.000225962	0.0202457		ENSMUSG00000022779	Top3b	chr16	+	16889482	16890261	1	1
																		ENSMUSG00000033763	Mtss1l	chr8	+	110737142	110737220	0.000227958	0.0203535		ENSMUSG00000021476	Habp4	chr13	+	64182106	64184758	0.959135	1
																		ENSMUSG00000025498	Irf7	chr7	-	141264492	141264783	0.000229649	0.0204644		ENSMUSG00000030744	Rps3	chr7	-	99482260	99482700	1	1
																		ENSMUSG00000044134	Fam109a	chr5	+	121850469	121850546	0.000230912	0.0205367		ENSMUSG00000115987	Vps28	chr15	-	76622470	76622708	1	1
																		ENSMUSG00000042870	Tom1	chr8	+	75051507	75051657	0.000233149	0.0206953		ENSMUSG00000115987	Vps28	chr15	-	76623170	76623494	1	1
																		ENSMUSG00000109378	Gm49396	chr7	+	30564473	30564607	0.000234027	0.0207328		ENSMUSG00000115987	Vps28	chr15	-	76623170	76624175	1	1
																		ENSMUSG00000000384	Tbrg4	chr11	-	6619971	6620143	0.000236855	0.0208213		ENSMUSG00000115987	Vps28	chr15	-	76623170	76624175	1	1
																		ENSMUSG00000035139	Secisbp2	chr13	+	51654385	51654635	0.000235828	0.0208213		ENSMUSG00000037773	Pced1a	chr2	-	130422224	130422704	1	1
																		ENSMUSG00000026131	Dst	chr1	+	34303420	34303531	0.000236819	0.0208213		ENSMUSG00000042831	Alkbh6	chr7	+	30309480	30310054	1	1
																		ENSMUSG00000022479	Vdr	chr15	-	97869317	97869423	0.000236419	0.0208213		ENSMUSG00000042831	Alkbh6	chr7	+	30309480	30310054	0.3177	1
																		ENSMUSG00000056851	Pcbp2	chr15	+	102488775	102488814	0.000239949	0.0210526		ENSMUSG00000042831	Alkbh6	chr7	+	30312236	30312707	0.591701	1
																		ENSMUSG00000021288	Klc1	chr12	+	111793648	111793699	0.000241307	0.0210905		ENSMUSG00000028057	Rit1	chr3	+	88717325	88717658	0.295148	1
																		ENSMUSG00000025812	Pard3	chr8	+	127410731	127410773	0.000241206	0.0210905		ENSMUSG00000028057	Rit1	chr3	+	88717325	88717658	0.676802	1
																		ENSMUSG00000017715	Pgs1	chr11	+	118014646	118014722	0.000244129	0.0212963		ENSMUSG00000028057	Rit1	chr3	+	88725994	88726471	1	1
																		ENSMUSG00000037210	Fam193a	chr5	+	34440347	34440590	0.000246181	0.0214342		ENSMUSG00000028057	Rit1	chr3	+	88725994	88726471	1	1
																		ENSMUSG00000055720	Ubl7	chr9	+	57911716	57911825	0.000247183	0.0214804		ENSMUSG00000031537	Ikbkb	chr8	-	22665488	22665911	0.643357	1
																		ENSMUSG00000030166	Rad52	chr6	+	119915233	119915352	0.000247931	0.0215044		ENSMUSG00000031537	Ikbkb	chr8	-	22668944	22671745	0.469338	1
																		ENSMUSG00000029086	Prom1	chr5	-	44000776	44000845	0.000249326	0.0215842		ENSMUSG00000037487	Ubr5	chr15	-	37973302	37975671	1	1
																		ENSMUSG00000031681	Smad1	chr8	-	79353329	79353446	0.000251432	0.0217252		ENSMUSG00000027185	Nat10	chr2	-	103734374	103734990	0.952626	1
																		ENSMUSG00000034850	Tmem127	chr2	+	127248491	127248809	0.000252369	0.0217649		ENSMUSG00000041921	Metap1d	chr2	+	71509740	71511560	0.678701	1
																		ENSMUSG00000005936	Kctd20	chr17	+	28961413	28961687	0.000256837	0.0220667		ENSMUSG00000038637	Lrrc56	chr7	+	141196981	141198361	1	1
																		ENSMUSG00000041974	Spidr	chr16	-	15966601	15966852	0.000256424	0.0220667		ENSMUSG00000024845	Tmem134	chr19	+	4125959	4126200	1	1
																		ENSMUSG00000034584	Exph5	chr9	+	53367076	53367212	0.000260103	0.0221958		ENSMUSG00000024845	Tmem134	chr19	+	4127549	4127836	1	1
																		ENSMUSG00000026999	Nup35	chr2	+	80657188	80657353	0.00026029	0.0221958		ENSMUSG00000002963	Pnkp	chr7	+	44858162	44858749	0.691917	1
																		ENSMUSG00000028896	Rcc1	chr4	-	132338050	132338238	0.000259228	0.0221958		ENSMUSG00000002963	Pnkp	chr7	+	44859722	44859945	1	1
																		ENSMUSG00000015290	Ubl4a	chrX	-	74368152	74368258	0.000259504	0.0221958		ENSMUSG00000029472	Anapc5	chr5	-	122791607	122791934	0.215415	1
																		ENSMUSG00000028826	Tmem57	chr4	-	134836766	134837034	0.000261447	0.0222528		ENSMUSG00000029472	Anapc5	chr5	-	122791607	122791934	1	1
																		ENSMUSG00000030137	Tuba8	chr6	+	121221300	121221449	0.000263495	0.0223107		ENSMUSG00000029472	Anapc5	chr5	-	122799338	122800593	1	1
																		ENSMUSG00000017119	Nbr1	chr11	+	101572461	101572572	0.000263598	0.0223107		ENSMUSG00000062127	Cttnbp2nl	chr3	-	105007947	105011423	1	1
																		ENSMUSG00000034173	Zbed5	chr5	+	129899182	129899432	0.000263109	0.0223107		ENSMUSG00000038429	Usp5	chr6	-	124816983	124817471	1	1
																		ENSMUSG00000000738	Spg7	chr8	+	123079968	123080131	0.000265481	0.0224012		ENSMUSG00000020527	Myo19	chr11	+	84905539	84907402	1	1
																		ENSMUSG00000033318	Gstt2	chr10	-	75833651	75833739	0.00026565	0.0224012		ENSMUSG00000040029	Ipo8	chr6	-	148770682	148775093	1	1
																		ENSMUSG00000021277	Traf3	chr12	+	111219810	111219921	0.000267148	0.0224443		ENSMUSG00000045128	Rpl18a	chr8	-	70895378	70895709	0.371446	1
																		ENSMUSG00000005087	Cd44	chr2	-	102842260	102842377	0.000266861	0.0224443		ENSMUSG00000045128	Rpl18a	chr8	-	70895599	70896045	1	1
																		ENSMUSG00000024970	Spindoc	chr19	-	7374295	7374445	0.000268832	0.0225443		ENSMUSG00000039318	Rab3gap2	chr1	+	185266900	185267279	0.184499	1
																		ENSMUSG00000031819	Emc8	chr8	-	120658527	120658622	0.000269417	0.0225518		ENSMUSG00000039318	Rab3gap2	chr1	+	185266900	185267279	1	1
																		ENSMUSG00000002413	Braf	chr6	-	39648820	39648856	0.000271766	0.0226651		ENSMUSG00000039318	Rab3gap2	chr1	+	185275911	185277221	1	1
																		ENSMUSG00000025498	Irf7	chr7	-	141264492	141264559	0.000271294	0.0226651		ENSMUSG00000034126	Pomt2	chr12	-	87111336	87111583	1	1
																		ENSMUSG00000064057	Scgb3a1	chr11	+	49664018	49664123	0.000273912	0.0228023		ENSMUSG00000034761	Map4k5	chr12	-	69807197	69809282	1	1
																		ENSMUSG00000036104	Rab3gap1	chr1	+	127939045	127939148	0.000277785	0.0230825		ENSMUSG00000039523	Cep104	chr4	+	154006689	154008732	1	1
																		ENSMUSG00000066839	Ecsit	chr9	-	22078147	22078265	0.000279848	0.0231754		ENSMUSG00000016559	H3f3b	chr11	-	116023624	116024019	1	1
																		ENSMUSG00000026790	Odf2	chr2	+	29893037	29893154	0.00027992	0.0231754		ENSMUSG00000024908	Ppp6r3	chr19	-	3483527	3487091	0.175424	1
																		ENSMUSG00000034007	Scaper	chr9	-	55874644	55874904	0.000282219	0.0233232		ENSMUSG00000026107	Nabp1	chr1	-	51469819	51471411	0.434278	1
																		ENSMUSG00000040447	Spns2	chr11	-	72458632	72458699	0.00028486	0.0234989		ENSMUSG00000026107	Nabp1	chr1	-	51477477	51478399	0.245599	1
																		ENSMUSG00000021288	Klc1	chr12	+	111793648	111793699	0.000285477	0.0235072		ENSMUSG00000026107	Nabp1	chr1	-	51477477	51478399	1	1
																		ENSMUSG00000029810	Tmem176b	chr6	-	48840360	48840453	0.000288495	0.0237129		ENSMUSG00000035086	Becn1	chr11	-	101289782	101290499	1	1
																		ENSMUSG00000028041	Adam15	chr3	-	89340862	89340937	0.000289317	0.0237376		ENSMUSG00000035086	Becn1	chr11	-	101294000	101295164	0.758125	1
																		ENSMUSG00000027230	Creb3l1	chr2	-	91991886	91992044	0.000289892	0.0237419		ENSMUSG00000035086	Becn1	chr11	-	101294000	101295164	1	1
																		ENSMUSG00000029769	Ccdc136	chr6	+	29414785	29414980	0.000295325	0.0241002		ENSMUSG00000035086	Becn1	chr11	-	101294000	101295164	1	1
																		ENSMUSG00000040263	Klhdc4	chr8	-	121801138	121801214	0.000295114	0.0241002		ENSMUSG00000035086	Becn1	chr11	-	101294000	101295164	1	1
																		ENSMUSG00000021493	Pdlim7	chr13	-	55508207	55508326	0.000299072	0.0243306		ENSMUSG00000035086	Becn1	chr11	-	101295533	101296316	1	1
																		ENSMUSG00000002546	Golga2	chr2	+	32297753	32297834	0.000299216	0.0243306		ENSMUSG00000035086	Becn1	chr11	-	101295533	101296316	0.573823	1
																		ENSMUSG00000033577	Myo6	chr9	+	80296642	80296681	0.000299773	0.0243324		ENSMUSG00000039001	Rps21	chr2	+	180257620	180257851	0.722242	1
																		ENSMUSG00000021843	Ktn1	chr14	+	47704419	47704488	0.00030231	0.0244946		ENSMUSG00000071653	1810009A15Rik	chr19	+	8889123	8889727	1	1
																		ENSMUSG00000032392	Parp16	chr9	+	65215348	65215632	0.000303832	0.0245742		ENSMUSG00000029326	Enoph1	chr5	+	100067798	100068760	0.322021	1
																		ENSMUSG00000093575	Gm20695	chr16	+	3894368	3894484	0.00030991	0.0250214		ENSMUSG00000015656	Hspa8	chr9	+	40801917	40802623	1	1
																		ENSMUSG00000056342	Usp34	chr11	+	23488208	23488368	0.000310835	0.0250516		ENSMUSG00000015656	Hspa8	chr9	+	40802417	40802891	0.122414	1
																		ENSMUSG00000035967	Ints6l	chrX	+	56494132	56494243	0.000313102	0.0251897		ENSMUSG00000035711	Dok3	chr13	-	55527331	55528554	1	1
																		ENSMUSG00000035325	Sec31a	chr5	-	100373424	100373715	0.000314759	0.0252784		ENSMUSG00000040434	Large2	chr2	-	92370565	92370893	1	1
																		ENSMUSG00000047804	Akap10	chr11	-	61904774	61904859	0.000316851	0.0254016		ENSMUSG00000036672	Cenpt	chr8	-	105845259	105846391	0.75733	1
																		ENSMUSG00000005968	Tuft1	chr3	-	94639394	94639469	0.000320731	0.0256225		ENSMUSG00000036672	Cenpt	chr8	-	105845259	105846391	1	1
																		ENSMUSG00000024566	Atp9b	chr18	-	80762061	80762232	0.000320443	0.0256225		ENSMUSG00000036672	Cenpt	chr8	-	105846164	105846391	1	1
																		ENSMUSG00000040712	Camta2	chr11	-	70683278	70683417	0.000327307	0.0259791		ENSMUSG00000036672	Cenpt	chr8	-	105849186	105849521	1	1
																		ENSMUSG00000035569	Ankrd11	chr8	-	122899978	122900149	0.000326525	0.0259791		ENSMUSG00000029359	Tesc	chr5	+	118056376	118056644	1	1
																		ENSMUSG00000022607	Ptk2	chr15	-	73391758	73391880	0.000327478	0.0259791		ENSMUSG00000029359	Tesc	chr5	+	118056376	118056644	1	1
																		ENSMUSG00000037851	Iars	chr13	+	49704270	49704393	0.000326902	0.0259791		ENSMUSG00000022587	Ly6e	chr15	+	74957776	74958388	1	1
																		ENSMUSG00000028078	Dclk2	chr3	-	86789408	86789490	0.000329526	0.0260508		ENSMUSG00000022587	Ly6e	chr15	+	74958268	74959331	1	1
																		ENSMUSG00000025384	Faap100	chr11	-	120373106	120373243	0.000329467	0.0260508		ENSMUSG00000028102	Pex11b	chr3	+	96643574	96644726	0.573482	1
																		ENSMUSG00000031671	Setd6	chr8	+	95716352	95716494	0.000333376	0.026264		ENSMUSG00000020840	Blmh	chr11	+	76949959	76951185	1	1
																		ENSMUSG00000041740	Rnf10	chr5	-	115249396	115249522	0.000333329	0.026264		ENSMUSG00000028826	Tmem57	chr4	-	134802758	134806691	1	1
																		ENSMUSG00000084883	Ccdc85c	chr12	-	108216786	108216825	0.00033515	0.0263581		ENSMUSG00000040703	Cyp2s1	chr7	-	25802474	25804057	1	1
																		ENSMUSG00000070002	Ell	chr8	+	70585156	70585235	0.000336007	0.0263801		ENSMUSG00000025499	Hras	chr7	-	141191341	141192290	1	1
																		ENSMUSG00000056204	Pgpep1	chr8	-	70652404	70652521	0.00033764	0.0264454		ENSMUSG00000036833	Pnpla7	chr2	+	25002614	25003032	1	1
																		ENSMUSG00000059142	Zfp945	chr17	-	22861731	22861852	0.000338001	0.0264454		ENSMUSG00000024947	Men1	chr19	+	6335038	6335905	1	1
																		ENSMUSG00000058886	Deaf1	chr7	-	141324441	141324616	0.000340976	0.0266324		ENSMUSG00000024947	Men1	chr19	+	6338282	6338961	1	1
																		ENSMUSG00000028455	Stoml2	chr4	-	43029492	43029553	0.000345639	0.0269043		ENSMUSG00000022553	Maf1	chr15	+	76353137	76353460	0.798127	1
																		ENSMUSG00000045962	Wnk1	chr6	-	119953770	119954232	0.000345518	0.0269043		ENSMUSG00000003526	Prodh	chr16	-	18077443	18077883	1	1
																		ENSMUSG00000049728	Zfp668	chr7	-	127874676	127874758	0.000347078	0.0269242		ENSMUSG00000001687	Ubl3	chr5	-	148552156	148552789	1	1
																		ENSMUSG00000028041	Adam15	chr3	-	89340400	89340472	0.000346882	0.0269242		ENSMUSG00000025487	Psmd13	chr7	+	140886387	140886845	1	1
																		ENSMUSG00000047804	Akap10	chr11	-	61903906	61904030	0.000350513	0.0271445		ENSMUSG00000037266	Rsrp1	chr4	+	134925292	134926818	0.309109	1
																		ENSMUSG00000042810	Krba1	chr6	+	48405236	48405389	0.000360789	0.0278929		ENSMUSG00000028393	Alad	chr4	-	62510867	62511612	1	1
																		ENSMUSG00000025529	Zfp711	chrX	+	112627169	112627304	0.000362779	0.0279992		ENSMUSG00000018442	Derl2	chr11	-	71013442	71015800	1	1
																		ENSMUSG00000022607	Ptk2	chr15	-	73365040	73365195	0.000367037	0.0282799		ENSMUSG00000020918	Kat2a	chr11	-	100705958	100706493	0.492148	1
																		ENSMUSG00000034974	Dapk3	chr10	+	81191041	81191068	0.00037479	0.0288285		ENSMUSG00000041343	Ankrd42	chr7	-	92610243	92610650	1	1
																		ENSMUSG00000030347	D6Wsu163e	chr6	+	126966879	126967082	0.000375782	0.028856		ENSMUSG00000026457	Adipor1	chr1	+	134423957	134424922	1	1
																		ENSMUSG00000001134	Uxt	chrX	-	20961634	20961786	0.00037659	0.0288694		ENSMUSG00000038822	Hace1	chr10	+	45700953	45709994	1	1
																		ENSMUSG00000074867	Zfp808	chr13	+	62169753	62169814	0.000381432	0.0291914		ENSMUSG00000039648	Kyat1	chr2	-	30185125	30185753	0.64736	1
																		ENSMUSG00000008398	Elk3	chr10	-	93264879	93265680	0.000390196	0.0298121		ENSMUSG00000032413	Rasa2	chr9	-	96566015	96568487	1	1
																		ENSMUSG00000058402	Zfp420	chr7	+	29861015	29861068	0.000390931	0.0298182		ENSMUSG00000002763	Pex6	chr17	+	46723673	46724027	0.736849	1
																		ENSMUSG00000001247	Lsr	chr7	-	30962097	30962244	0.000391859	0.0298255		ENSMUSG00000002799	Jag2	chr12	-	112915470	112915993	1	1
																		ENSMUSG00000025925	Terf1	chr1	+	15815885	15815972	0.000392338	0.0298255		ENSMUSG00000002799	Jag2	chr12	-	112916603	112916939	1	1
																		ENSMUSG00000040712	Camta2	chr11	-	70683278	70683350	0.000395678	0.0300293		ENSMUSG00000071644	Eef1g	chr19	+	8969161	8969506	1	1
																		ENSMUSG00000070047	Fat1	chr8	+	45049841	45049877	0.000403392	0.0305638		ENSMUSG00000039686	Zer1	chr2	-	30107494	30108122	1	1
																		ENSMUSG00000018849	Wwc1	chr11	-	35860095	35860187	0.000404322	0.0305834		ENSMUSG00000039686	Zer1	chr2	-	30107975	30108335	1	1
																		ENSMUSG00000035325	Sec31a	chr5	-	100373379	100373715	0.00040656	0.0306714		ENSMUSG00000039686	Zer1	chr2	-	30108220	30110381	1	1
																		ENSMUSG00000023015	Racgap1	chr15	-	99643421	99643523	0.000406833	0.0306714		ENSMUSG00000061046	Haghl	chr17	-	25784074	25784572	1	1
																		ENSMUSG00000026790	Odf2	chr2	+	29893000	29893154	0.000414257	0.0311795		ENSMUSG00000027936	Crtc2	chr3	+	90257116	90257411	0.136047	1
																		ENSMUSG00000028759	Hp1bp3	chr4	+	138221525	138221718	0.000415791	0.0311871		ENSMUSG00000027936	Crtc2	chr3	+	90258464	90259492	0.508825	1
																		ENSMUSG00000058704	Memo1	chr17	-	74217026	74217103	0.000416412	0.0311871		ENSMUSG00000003421	Nosip	chr7	+	45076068	45076428	1	1
																		ENSMUSG00000031565	Fgfr1	chr8	+	25563373	25563524	0.000415115	0.0311871		ENSMUSG00000027360	Hdc	chr2	-	126604240	126606482	1	1
																		ENSMUSG00000057531	Dtnbp1	chr13	-	44923148	44923292	0.000417913	0.0312481		ENSMUSG00000012123	Crybg2	chr4	+	134089271	134091236	1	1
																		ENSMUSG00000000884	Gnb1l	chr16	+	18544110	18544273	0.000422662	0.0315073		ENSMUSG00000032383	Ppib	chr9	+	66062988	66065671	1	1
																		ENSMUSG00000022201	Zfr	chr15	+	12118238	12118338	0.000422764	0.0315073		ENSMUSG00000020898	Ctc1	chr11	+	69021029	69022614	0.704036	1
																		ENSMUSG00000086968	4933431E20Rik	chr3	-	107894860	107894992	0.000423858	0.0315373		ENSMUSG00000020898	Ctc1	chr11	+	69021029	69022614	1	1
																		ENSMUSG00000041895	Wipi1	chr11	-	109583126	109583197	0.000435481	0.0323492		ENSMUSG00000020898	Ctc1	chr11	+	69021029	69022614	1	1
																		ENSMUSG00000027900	Dram2	chr3	+	106552155	106552280	0.000437747	0.0324118		ENSMUSG00000020898	Ctc1	chr11	+	69021029	69022614	0.27546	1
																		ENSMUSG00000041115	Iqsec2	chrX	+	152216340	152216439	0.000437474	0.0324118		ENSMUSG00000089832	Shkbp1	chr7	-	27355400	27355626	1	1
																		ENSMUSG00000042557	Sin3a	chr9	+	57081094	57081202	0.000440338	0.0324933		ENSMUSG00000016763	Scube1	chr15	-	83608217	83608876	1	1
																		ENSMUSG00000031520	Vegfc	chr8	+	54169024	54169176	0.000439812	0.0324933		ENSMUSG00000005373	Mlxipl	chr5	+	135133753	135134121	1	1
																		ENSMUSG00000031153	Gripap1	chrX	+	7819166	7819321	0.000440989	0.0324933		ENSMUSG00000052221	Ppp1r36	chr12	+	76436142	76437638	1	1
																		ENSMUSG00000026319	2310035C23Rik	chr1	+	105721267	105721415	0.000442286	0.0325363		ENSMUSG00000008682	Rpl10	chrX	+	74271659	74271907	1	1
																		ENSMUSG00000078515	Ddi2	chr4	-	141689269	141689331	0.000444272	0.0326296		ENSMUSG00000025470	Zfp511	chr7	+	140039325	140040602	1	1
																		ENSMUSG00000078700	D030028A08Rik	chr11	+	96958852	96959024	0.000447416	0.0328076		ENSMUSG00000079507	H2-Q1	chr17	+	35323466	35325099	1	1
																		ENSMUSG00000038696	Mapkap1	chr2	+	34432002	34432330	0.000449347	0.0328435		ENSMUSG00000045752	Tssc4	chr7	+	143069935	143071087	0.254974	1
																		ENSMUSG00000017723	Wfdc2	chr2	+	164564056	164564212	0.000448669	0.0328435		ENSMUSG00000021223	Papln	chr12	+	83775342	83776561	1	1
																		ENSMUSG00000073616	Cops9	chr1	-	92639686	92639759	0.000450759	0.0328938		ENSMUSG00000052331	Ankrd44	chr1	-	54657615	54659006	1	1
																		ENSMUSG00000092470	Gm20518	chr16	-	17843971	17844208	0.000452141	0.0329419		ENSMUSG00000004567	Mcoln1	chr8	+	3508683	3509235	1	1
																		ENSMUSG00000030556	Lrrc28	chr7	-	67579689	67579750	0.000454632	0.0330705		ENSMUSG00000004567	Mcoln1	chr8	+	3510319	3510915	1	1
																		ENSMUSG00000017119	Nbr1	chr11	+	101577931	101578037	0.000458378	0.0332898		ENSMUSG00000020812	1810032O08Rik	chr11	+	116674299	116675798	1	1
																		ENSMUSG00000021557	Agtpbp1	chr13	-	59460468	59460629	0.000462617	0.0334908		ENSMUSG00000047284	Neurl4	chr11	+	69903007	69903719	1	1
																		ENSMUSG00000031379	Pir	chrX	+	164271602	164271731	0.000462374	0.0334908		ENSMUSG00000029298	Gbp9	chr5	-	105082703	105083853	0.308091	1
																		ENSMUSG00000002718	Cse1l	chr2	+	166935922	166936026	0.000467147	0.0337651		ENSMUSG00000022253	Nadk2	chr15	+	9100105	9100202	0.331436	1
																		ENSMUSG00000020941	Map3k14	chr11	-	103226986	103227137	0.000473604	0.0341776		ENSMUSG00000061878	Sphk1	chr11	+	116534848	116535174	0.408459	1
																		ENSMUSG00000056211	R3hdm1	chr1	+	128190637	128190739	0.000475687	0.0342735		ENSMUSG00000040356	Skiv2l	chr17	-	34845003	34845314	0.259247	1
																		ENSMUSG00000023044	Csad	chr15	-	102202443	102202574	0.000478317	0.0343002		ENSMUSG00000040356	Skiv2l	chr17	-	34845648	34845912	1	1
																		ENSMUSG00000027012	Dync1i2	chr2	+	71233648	71233708	0.000477713	0.0343002		ENSMUSG00000040356	Skiv2l	chr17	-	34846026	34846667	0.652824	1
																		ENSMUSG00000026313	Hdac4	chr1	-	91991482	91991614	0.000477697	0.0343002		ENSMUSG00000040356	Skiv2l	chr17	-	34846026	34846667	1	1
																		ENSMUSG00000052539	Magi3	chr3	-	104016601	104016692	0.000494799	0.0354263		ENSMUSG00000040356	Skiv2l	chr17	-	34846866	34847324	0.752349	1
																		ENSMUSG00000039477	Tnrc18	chr5	-	142764768	142764897	0.000498152	0.0355546		ENSMUSG00000031482	Slc25a15	chr8	-	22380837	22383344	1	1
																		ENSMUSG00000056962	Jmjd6	chr11	-	116839837	116839931	0.000497815	0.0355546		ENSMUSG00000062963	Ufc1	chr1	-	171289517	171289947	1	1
																		ENSMUSG00000013997	Nit1	chr1	-	171345190	171345312	0.000503604	0.0358594		ENSMUSG00000004319	Clcn3	chr8	-	60922789	60927418	1	1
																		ENSMUSG00000042472	Zfp410	chr12	+	84338641	84338782	0.000503997	0.0358594		ENSMUSG00000021238	Aldh6a1	chr12	-	84442070	84443788	1	1
																		ENSMUSG00000020282	Rhbdf1	chr11	-	32210707	32210758	0.000506177	0.0359583		ENSMUSG00000041096	Tspyl2	chrX	-	152340085	152340380	1	1
																		ENSMUSG00000035642	Aamdc	chr7	-	97565150	97565300	0.000512914	0.0363801		ENSMUSG00000022283	Pabpc1	chr15	-	36597972	36598312	0.614404	1
																		ENSMUSG00000026999	Nup35	chr2	+	80655948	80657353	0.000516222	0.0365554		ENSMUSG00000034432	Cops8	chr1	+	90604374	90605512	1	1
																		ENSMUSG00000057691	Zfp746	chr6	-	48082153	48082267	0.000516991	0.0365554		ENSMUSG00000067369	Trmt2b	chrX	-	134238142	134238586	1	1
																		ENSMUSG00000017713	Tha1	chr11	-	117871011	117871100	0.000518508	0.0366059		ENSMUSG00000067369	Trmt2b	chrX	-	134240078	134240569	1	1
																		ENSMUSG00000074643	Cpne1	chr2	-	156098229	156098372	0.000521211	0.0366264		ENSMUSG00000021611	Tert	chr13	+	73627350	73628674	1	1
																		ENSMUSG00000024381	Bin1	chr18	+	32426223	32426352	0.000520551	0.0366264		ENSMUSG00000005566	Trim28	chr7	+	13027832	13028135	0.627823	1
																		ENSMUSG00000005103	Wdr1	chr5	-	38529936	38530110	0.000520461	0.0366264		ENSMUSG00000005566	Trim28	chr7	+	13028407	13028778	1	1
																		ENSMUSG00000023882	Zfp54	chr17	+	21427331	21427371	0.000527812	0.037033		ENSMUSG00000005566	Trim28	chr7	+	13029087	13029252	0.889389	1
																		ENSMUSG00000018570	2810408A11Rik	chr11	-	69897618	69897754	0.000529022	0.0370608		ENSMUSG00000026942	Traf2	chr2	-	25528231	25530448	1	1
																		ENSMUSG00000037447	Arid5a	chr1	+	36318083	36318181	0.000530439	0.037103		ENSMUSG00000040466	Blvrb	chr7	+	27459255	27459633	0.771092	1
																		ENSMUSG00000028850	Gpatch3	chr4	+	133582981	133583109	0.000532935	0.0372204		ENSMUSG00000019261	Map1s	chr8	+	70912905	70916574	1	1
																		ENSMUSG00000032577	Mapkapk3	chr9	-	107257414	107257500	0.000534927	0.0373024		ENSMUSG00000060216	Arrb2	chr11	+	70437943	70438391	1	1
																		ENSMUSG00000049439	Cyp20a1	chr1	+	60352908	60353075	0.000537463	0.0374219		ENSMUSG00000002486	Tchp	chr5	+	114719578	114720268	1	1
																		ENSMUSG00000028521	Slc35d1	chr4	-	103208109	103208212	0.000541984	0.0375494		ENSMUSG00000031939	Taf1d	chr9	+	15311526	15314032	0.5696	1
																		ENSMUSG00000028680	Plk3	chr4	-	117132904	117133034	0.000542593	0.0375494		ENSMUSG00000031939	Taf1d	chr9	+	15313989	15314264	0.386803	1
																		ENSMUSG00000025571	Tnrc6c	chr11	+	117741644	117741818	0.000542321	0.0375494		ENSMUSG00000031939	Taf1d	chr9	+	15313989	15315131	0.701014	1
																		ENSMUSG00000033819	Ppp1r16a	chr15	+	76693438	76693514	0.000540165	0.0375494		ENSMUSG00000031939	Taf1d	chr9	+	15315101	15315440	0.54114	1
																		ENSMUSG00000055720	Ubl7	chr9	+	57911709	57911825	0.000545132	0.0376679		ENSMUSG00000031939	Taf1d	chr9	+	15315382	15316978	0.493699	1
																		ENSMUSG00000002885	Adgre5	chr8	-	83731902	83732037	0.000547048	0.037743		ENSMUSG00000028245	Nsmaf	chr4	-	6417164	6417877	1	1
																		ENSMUSG00000028906	Epb41	chr4	-	131937014	131937464	0.000551561	0.0379968		ENSMUSG00000028245	Nsmaf	chr4	-	6418471	6421136	0.361603	1
																		ENSMUSG00000035642	Aamdc	chr7	-	97569686	97569774	0.000552619	0.0380122		ENSMUSG00000028245	Nsmaf	chr4	-	6420049	6421136	1	1
																		ENSMUSG00000025372	Baiap2	chr11	+	119997488	119997690	0.000556984	0.0382546		ENSMUSG00000022536	Glyr1	chr16	-	5029502	5030241	0.304745	1
																		ENSMUSG00000031024	St5	chr7	-	109570006	109570111	0.000562622	0.0385836		ENSMUSG00000040263	Klhdc4	chr8	-	121796917	121798236	0.828994	1
																		ENSMUSG00000032366	Tpm1	chr9	-	67031950	67032026	0.000564517	0.0385839		ENSMUSG00000036438	Calm2	chr17	-	87435603	87435934	0.174297	1
																		ENSMUSG00000029507	Pus1	chr5	-	110776553	110776607	0.000563508	0.0385839		ENSMUSG00000039382	Wdr45	chrX	+	7723314	7723753	1	1
																		ENSMUSG00000034269	Setd5	chr6	+	113105664	113105761	0.000565168	0.0385839		ENSMUSG00000039382	Wdr45	chrX	+	7723314	7723753	1	1
																		ENSMUSG00000042510	AA986860	chr1	+	130737501	130737687	0.000573428	0.0390553		ENSMUSG00000043631	Ecm2	chr13	+	49518301	49521072	1	1
																		ENSMUSG00000037652	Phc3	chr3	-	30935951	30936020	0.000573788	0.0390553		ENSMUSG00000061937	Csn1s2a	chr5	+	87784564	87785313	0.886562	1
																		ENSMUSG00000024764	Naa40	chr19	-	7230187	7230283	0.000577996	0.0392831		ENSMUSG00000029385	Ccng2	chr5	+	93270793	93271279	0.849491	1
																		ENSMUSG00000014547	Wdfy2	chr14	+	62900254	62900328	0.000581471	0.0394603		ENSMUSG00000021804	Rgr	chr14	-	37034908	37038968	1	1
																		ENSMUSG00000032192	Gnb5	chr9	+	75343507	75343604	0.000587884	0.0398361		ENSMUSG00000074489	Bglap3	chr3	-	88368619	88369328	0.873434	1
																		ENSMUSG00000001229	Dpp9	chr17	-	56189761	56189880	0.000591935	0.0400237		ENSMUSG00000074489	Bglap3	chr3	-	88370127	88371479	0.696231	1
																		ENSMUSG00000033306	Lpp	chr16	+	24845090	24845217	0.000592409	0.0400237		ENSMUSG00000021692	Dimt1	chr13	+	106948700	106949785	1	1
																		ENSMUSG00000025173	Wdr45b	chr11	-	121338556	121338644	0.000604719	0.0407948		ENSMUSG00000021363	Mak	chr13	-	41042018	41046330	1	1
																		ENSMUSG00000028211	Trp53inp1	chr4	+	11167896	11167934	0.000610272	0.0410517		ENSMUSG00000021282	Eif5	chr12	+	111539407	111540302	0.230567	1
																		ENSMUSG00000022106	Rcbtb2	chr14	+	73178432	73178563	0.00061033	0.0410517		ENSMUSG00000071172	Srsf3	chr17	+	29038489	29041293	1	1
																		ENSMUSG00000087177	E130307A14Rik	chr10	-	39645555	39645808	0.00061311	0.0411779		ENSMUSG00000062908	Acadm	chr3	-	153938896	153939167	0.272345	1
																		ENSMUSG00000060470	Adgrg3	chr8	+	95034949	95035096	0.000621438	0.0416144		ENSMUSG00000029068	Ccnl2	chr4	+	155817922	155820428	0.613437	1
																		ENSMUSG00000004768	Rab23	chr1	+	33736799	33736882	0.000621337	0.0416144		ENSMUSG00000029068	Ccnl2	chr4	+	155818538	155820428	0.446753	1
																		ENSMUSG00000035476	Tab3	chrX	+	85593651	85593754	0.000627649	0.0419686		ENSMUSG00000006728	Cdk4	chr10	+	127065154	127066003	1	1
																		ENSMUSG00000022906	Parp9	chr16	+	35945768	35945952	0.000630055	0.0419835		ENSMUSG00000031736	Crnde	chr8	-	92346349	92346870	1	1
																		ENSMUSG00000006641	Slc5a6	chr5	-	31040657	31040798	0.000629381	0.0419835		ENSMUSG00000029534	St7	chr6	+	17850356	17852412	1	1
																		ENSMUSG00000018761	Mpdu1	chr11	-	69657724	69657843	0.000630638	0.0419835		ENSMUSG00000032596	Uba7	chr9	+	107977328	107978022	0.873076	1
																		ENSMUSG00000005610	Eif4g2	chr7	-	111076279	111076393	0.000633791	0.0421318		ENSMUSG00000032596	Uba7	chr9	+	107979393	107979691	0.800092	1
																		ENSMUSG00000074272	Ceacam1	chr7	-	25464848	25466437	0.000635021	0.0421521		ENSMUSG00000032596	Uba7	chr9	+	107981203	107981581	1	1
																		ENSMUSG00000098950	Gm28036	chr2	-	156096417	156098372	0.000637634	0.0422639		ENSMUSG00000032596	Uba7	chr9	+	107981203	107981581	1	1
																		ENSMUSG00000087366	Junos	chr4	+	95150119	95150275	0.000639909	0.0423216		ENSMUSG00000030120	Mlf2	chr6	+	124932098	124932537	1	1
																		ENSMUSG00000047656	Trpt1	chr19	+	6997932	6998102	0.000640363	0.0423216		ENSMUSG00000030120	Mlf2	chr6	+	124932098	124932537	1	1
																		ENSMUSG00000056962	Jmjd6	chr11	-	116839837	116839926	0.000648616	0.0428049		ENSMUSG00000053291	Rab4b	chr7	-	27175778	27176238	1	1
																		ENSMUSG00000015942	Gtf2ird2	chr5	+	134206770	134206827	0.000653855	0.0430882		ENSMUSG00000004988	Fxyd4	chr6	-	117935853	117936780	1	1
																		ENSMUSG00000008601	Rab25	chr3	-	88545060	88545256	0.000657896	0.0432474		ENSMUSG00000004988	Fxyd4	chr6	-	117935853	117936780	1	1
																		ENSMUSG00000023348	Trip6	chr5	-	137312705	137313089	0.00065817	0.0432474		ENSMUSG00000004988	Fxyd4	chr6	-	117935853	117936780	1	1
																		ENSMUSG00000022100	Xpo7	chr14	-	70690981	70691154	0.00066351	0.0435354		ENSMUSG00000034022	Cpsf1	chr15	-	76596008	76596571	1	1
																		ENSMUSG00000042377	Fam83g	chr11	+	61701642	61701767	0.000671137	0.0439725		ENSMUSG00000034022	Cpsf1	chr15	-	76596219	76596571	0.740247	1
																		ENSMUSG00000019889	Ptprk	chr10	+	28570173	28570191	0.000673852	0.0440819		ENSMUSG00000034022	Cpsf1	chr15	-	76596008	76596698	1	1
																		ENSMUSG00000059142	Zfp945	chr17	-	22861731	22861852	0.000674924	0.0440819		ENSMUSG00000034022	Cpsf1	chr15	-	76596776	76597093	0.326872	1
																		ENSMUSG00000017664	Slc35c2	chr2	-	165282782	165282862	0.000675711	0.0440819		ENSMUSG00000034022	Cpsf1	chr15	-	76597430	76597730	1	1
																		ENSMUSG00000003778	Brd8	chr18	-	34608417	34608627	0.000680143	0.044269		ENSMUSG00000034022	Cpsf1	chr15	-	76599455	76599914	1	1
																		ENSMUSG00000052337	Immt	chr6	+	71872793	71872894	0.000680523	0.044269		ENSMUSG00000034022	Cpsf1	chr15	-	76600212	76600609	1	1
																		ENSMUSG00000001418	Glmp	chr3	+	88326114	88326312	0.000688002	0.0446917		ENSMUSG00000023942	Slc29a1	chr17	-	45589413	45589820	0.429626	1
																		ENSMUSG00000031822	Gse1	chr8	+	120553583	120553802	0.000691583	0.0448603		ENSMUSG00000074643	Cpne1	chr2	-	156073798	156074309	1	1
																		ENSMUSG00000034442	Trmt5	chr12	-	73281004	73281656	0.000696153	0.0450285		ENSMUSG00000074643	Cpne1	chr2	-	156078146	156078421	0.487457	1
																		ENSMUSG00000033763	Mtss1l	chr8	+	110729169	110729277	0.000695265	0.0450285		ENSMUSG00000074643	Cpne1	chr2	-	156078751	156078974	0.198086	1
																		ENSMUSG00000005949	Ctns	chr11	-	73197098	73197252	0.000702583	0.0453799		ENSMUSG00000004896	Rrnad1	chr3	-	87924343	87925431	0.399202	1
																		ENSMUSG00000061979	Rcc1l	chr5	-	134155739	134155913	0.000709484	0.0457607		ENSMUSG00000004896	Rrnad1	chr3	-	87926730	87927117	1	1
																		ENSMUSG00000030960	Eef1akmt2	chr7	-	132831359	132831576	0.00071958	0.0463462		ENSMUSG00000004896	Rrnad1	chr3	-	87927562	87928048	1	1
																		ENSMUSG00000018677	Slc25a39	chr11	-	102405692	102405826	0.000724199	0.0465779		ENSMUSG00000004896	Rrnad1	chr3	-	87927562	87928048	1	1
																		ENSMUSG00000020593	Lpin1	chr12	-	16540913	16541017	0.000729324	0.0468414		ENSMUSG00000025158	Rfng	chr11	-	120782382	120783160	0.667688	1
																		ENSMUSG00000006310	Zbtb32	chr7	-	30590632	30590701	0.000737663	0.0472436		ENSMUSG00000029464	Gpn3	chr5	+	122381189	122381494	1	1
																		ENSMUSG00000053332	Gas5	chr1	+	161036207	161036244	0.000737023	0.0472436		ENSMUSG00000053137	Mapk11	chr15	-	89145095	89145446	1	1
																		ENSMUSG00000024993	Fam45a	chr19	+	60817530	60817610	0.000739286	0.0472811		ENSMUSG00000053137	Mapk11	chr15	-	89146002	89146168	1	1
																		ENSMUSG00000013155	Enkd1	chr8	-	105704634	105704760	0.000742243	0.0474036		ENSMUSG00000053137	Mapk11	chr15	-	89146271	89146529	1	1
																		ENSMUSG00000007812	Zfp655	chr5	+	145235736	145235863	0.000755053	0.0481542		ENSMUSG00000027569	Mrgbp	chr2	+	180583400	180584871	0.810508	1
																		ENSMUSG00000025162	Csnk1d	chr11	-	120964947	120965010	0.000764271	0.048654		ENSMUSG00000027569	Mrgbp	chr2	+	180583400	180584871	1	1
																		ENSMUSG00000020107	Anapc16	chr10	-	60002417	60002467	0.000765027	0.048654		ENSMUSG00000027569	Mrgbp	chr2	+	180584405	180584871	0.724786	1
																		ENSMUSG00000037876	Jmjd1c	chr10	+	67216982	67217107	0.000767496	0.048743		ENSMUSG00000027569	Mrgbp	chr2	+	180584405	180584871	0.433803	1
																		ENSMUSG00000032534	Cep63	chr9	-	102623555	102623593	0.000774121	0.049027		ENSMUSG00000038671	Arfrp1	chr2	-	181364013	181364398	0.789092	1
																		ENSMUSG00000032123	Dpagt1	chr9	+	44327551	44327672	0.000773446	0.049027		ENSMUSG00000006360	Crip1	chr12	+	113153617	113153879	0.243194	1
																		ENSMUSG00000030400	Ercc2	chr7	+	19384098	19384161	0.000777936	0.0492001		ENSMUSG00000028700	Pomgnt1	chr4	+	116155728	116156014	1	1
																		ENSMUSG00000053453	Thoc7	chr14	-	13957553	13957631	0.000793369	0.0500937		ENSMUSG00000049281	Scn3b	chr9	+	40288373	40291618	1	1
																		ENSMUSG00000052566	Hook2	chr8	+	84998489	84998524	0.000794264	0.0500937		ENSMUSG00000015363	Trabd	chr15	+	89084902	89085446	1	1
																		ENSMUSG00000020284	1810043G02Rik	chr10	+	77979752	77980051	0.000795737	0.0501171		ENSMUSG00000015363	Trabd	chr15	+	89085525	89087071	1	1
																		ENSMUSG00000010608	Rbm25	chr12	+	83651645	83651750	0.000796887	0.0501202		ENSMUSG00000064127	Med14	chrX	-	12706298	12706692	1	1
																		ENSMUSG00000114797	Gm49336	chr14	-	60223316	60223415	0.000799456	0.0502125		ENSMUSG00000040549	Ckap5	chr2	+	91559048	91560911	1	1
																		ENSMUSG00000024713	Pcsk5	chr19	-	17617650	17617754	0.000800981	0.050239		ENSMUSG00000026628	Atf3	chr1	-	191177230	191177474	1	1
																		ENSMUSG00000028381	Ugcg	chr4	+	59218494	59218581	0.000806554	0.0505189		ENSMUSG00000056919	Cep162	chr9	-	87238353	87239933	1	1
																		ENSMUSG00000028455	Stoml2	chr4	-	43029492	43029637	0.000811038	0.05073		ENSMUSG00000002332	Dhrs1	chr14	-	55743657	55745088	1	1
																		ENSMUSG00000025571	Tnrc6c	chr11	+	117741668	117741818	0.000816869	0.0510246		ENSMUSG00000047793	Sned1	chr1	+	93283201	93283687	1	1
																		ENSMUSG00000003680	Taf6l	chr19	-	8773289	8773424	0.000819692	0.0511308		ENSMUSG00000021461	Fancc	chr13	-	63330538	63331893	1	1
																		ENSMUSG00000027637	1110008F13Rik	chr2	+	156865256	156865360	0.000822241	0.0512003		ENSMUSG00000037032	Apbb1	chr7	-	105567253	105567484	0.931649	1
																		ENSMUSG00000022749	Tbc1d23	chr16	-	57181491	57181536	0.000823055	0.0512003		ENSMUSG00000053080	2700081O15Rik	chr19	+	7421254	7421644	1	1
																		ENSMUSG00000024095	Hnrnpll	chr17	-	80044493	80044565	0.00083074	0.0515749		ENSMUSG00000029177	Cenpa	chr5	+	30672981	30673443	1	1
																		ENSMUSG00000014039	Prdm15	chr16	-	97829610	97829712	0.000831341	0.0515749		ENSMUSG00000029177	Cenpa	chr5	+	30672981	30673443	1	1
																		ENSMUSG00000021709	Erbin	chr13	-	103830187	103830331	0.000838637	0.0519407		ENSMUSG00000042436	Mfap4	chr11	+	61486909	61487261	1	1
																		ENSMUSG00000034101	Ctnnd1	chr2	-	84603187	84603274	0.000839519	0.0519407		ENSMUSG00000002981	Clptm1	chr7	-	19634055	19635013	1	1
																		ENSMUSG00000053333	Dis3l2	chr1	+	86791415	86791457	0.000851691	0.0526222		ENSMUSG00000002981	Clptm1	chr7	-	19638116	19639017	1	1
																		ENSMUSG00000022791	Tnk2	chr16	+	32680899	32680995	0.000853371	0.0526546		ENSMUSG00000004270	Lpcat3	chr6	+	124700006	124700278	0.953112	1
																		ENSMUSG00000027668	Mfn1	chr3	+	32569487	32569684	0.000856969	0.0528014		ENSMUSG00000018999	Slc35b4	chr6	-	34163588	34166423	1	1
																		ENSMUSG00000017664	Slc35c2	chr2	-	165282080	165282144	0.00085807	0.0528014		ENSMUSG00000022994	Adcy6	chr15	-	98596039	98596675	1	1
																		ENSMUSG00000057982	Zfp809	chr9	+	22236027	22236294	0.000862984	0.0530322		ENSMUSG00000049606	Zfp644	chr5	-	106635609	106638635	0.306465	1
																		ENSMUSG00000074063	Osgin1	chr8	+	119442432	119442569	0.000873614	0.0536131		ENSMUSG00000003068	Stk11	chr10	+	80126032	80126369	0.956557	1
																		ENSMUSG00000002372	Ranbp3	chr17	+	56701022	56701088	0.000879427	0.0538613		ENSMUSG00000038773	Kdm3b	chr18	+	34794449	34795780	1	1
																		ENSMUSG00000038831	Ralgps1	chr2	-	33145397	33145503	0.000880025	0.0538613		ENSMUSG00000007570	Fance	chr17	+	28318061	28318407	0.922825	1
																		ENSMUSG00000032580	Rbm5	chr9	-	107750007	107750092	0.000881431	0.053875		ENSMUSG00000026754	Golga1	chr2	-	39047022	39047766	1	1
																		ENSMUSG00000038546	Ranbp9	chr13	-	43422550	43422663	0.000890532	0.0543583		ENSMUSG00000028582	Cc2d1b	chr4	+	108625980	108626590	1	1
																		ENSMUSG00000068329	Htra2	chr6	-	83052697	83052726	0.000892543	0.0544081		ENSMUSG00000028582	Cc2d1b	chr4	+	108626300	108626590	1	1
																		ENSMUSG00000029599	Ddx54	chr5	+	120620471	120620533	0.000895114	0.0544381		ENSMUSG00000026201	Stk16	chr1	+	75212599	75213006	0.203862	1
																		ENSMUSG00000074794	Arrdc3	chr13	+	80889088	80889236	0.000895426	0.0544381		ENSMUSG00000090841	Myl6	chr10	-	128490860	128492136	1	1
																		ENSMUSG00000026991	Pkp4	chr2	+	59350493	59350622	0.000903778	0.0548726		ENSMUSG00000061410	Zcchc14	chr8	-	121609079	121609315	1	1
																		ENSMUSG00000037740	Mrps26	chr2	+	130564307	130564431	0.000908666	0.0550959		ENSMUSG00000019951	Uhrf1bp1l	chr10	+	89808517	89809778	0.377938	1
																		ENSMUSG00000029422	Rsrc2	chr5	-	123735821	123735896	0.000911889	0.0552178		ENSMUSG00000020156	Mum1	chr10	+	80228994	80230127	0.480566	1
																		ENSMUSG00000098950	Gm28036	chr2	-	156098184	156098372	0.000914514	0.0553032		ENSMUSG00000020156	Mum1	chr10	+	80236110	80238920	1	1
																		ENSMUSG00000042354	Gnl3	chr14	-	31017807	31017866	0.000923597	0.0557045		ENSMUSG00000020156	Mum1	chr10	+	80236110	80238920	1	1
																		ENSMUSG00000032525	Nktr	chr9	+	121728577	121728685	0.000922484	0.0557045		ENSMUSG00000020156	Mum1	chr10	+	80238314	80238920	0.863647	1
																		ENSMUSG00000037730	Mynn	chr3	+	30612468	30612552	0.000928065	0.0558999		ENSMUSG00000038766	Gabpb2	chr3	-	95203730	95204808	0.126868	1
																		ENSMUSG00000056692	D17Wsu92e	chr17	-	27768135	27768239	0.000929441	0.0559089		ENSMUSG00000003778	Brd8	chr18	-	34608417	34609949	0.207789	1
																		ENSMUSG00000068134	Zfp120	chr2	-	150119564	150119628	0.000943066	0.0566536		ENSMUSG00000026339	Ccdc93	chr1	+	121494395	121497068	1	1
																		ENSMUSG00000020189	Osbpl8	chr10	+	111224671	111224708	0.000948276	0.0568167		ENSMUSG00000031310	Zmym3	chrX	-	101415760	101416461	1	1
																		ENSMUSG00000021451	Sema4d	chr13	-	51711448	51711624	0.000947725	0.0568167		ENSMUSG00000002413	Braf	chr6	-	39677377	39677641	0.979868	1
																		ENSMUSG00000041119	Pde9a	chr17	+	31469793	31469898	0.000950348	0.056866		ENSMUSG00000005682	Pan2	chr10	+	128313140	128313743	1	1
																		ENSMUSG00000055762	Eef1d	chr15	-	75896819	75896919	0.000952487	0.0569192		ENSMUSG00000005682	Pan2	chr10	+	128314182	128314554	1	1
																		ENSMUSG00000037013	Ss18	chr18	-	14637391	14637484	0.000957015	0.0570401		ENSMUSG00000005682	Pan2	chr10	+	128318162	128319038	0.276759	1
																		ENSMUSG00000041757	Plekha6	chr1	+	133280338	133280407	0.000955981	0.0570401		ENSMUSG00000005682	Pan2	chr10	+	128318162	128319038	1	1
																		ENSMUSG00000029086	Prom1	chr5	-	44001269	44001293	0.000959784	0.0571304		ENSMUSG00000037364	Srrt	chr5	-	137296466	137296968	1	1
																		ENSMUSG00000035165	Kcne3	chr7	+	100182732	100182823	0.000966269	0.0574413		ENSMUSG00000037364	Srrt	chr5	-	137301317	137302314	1	1
																		ENSMUSG00000021302	Ggps1	chr13	-	14059318	14059457	0.000971958	0.057629		ENSMUSG00000028256	Odf2l	chr3	+	145126092	145127890	0.663665	1
																		ENSMUSG00000005087	Cd44	chr2	-	102842835	102842949	0.000971849	0.057629		ENSMUSG00000028256	Odf2l	chr3	+	145145875	145148616	1	1
																		ENSMUSG00000039607	Rbms3	chr9	-	116678646	116678697	0.000983261	0.0581478		ENSMUSG00000036775	Decr2	chr17	-	26083844	26084135	1	1
																		ENSMUSG00000020260	Pofut2	chr10	+	77262436	77262581	0.000982181	0.0581478		ENSMUSG00000028907	Utp11	chr4	-	124679701	124682323	1	1
																		ENSMUSG00000056692	D17Wsu92e	chr17	-	27767910	27768239	0.000984735	0.0581594		ENSMUSG00000036948	BC037034	chr5	-	138260834	138261716	1	1
																		ENSMUSG00000020388	Pdlim4	chr11	-	54063634	54063786	0.00098894	0.0582634		ENSMUSG00000026822	Lcn2	chr2	-	32384632	32385520	1	1
																		ENSMUSG00000054196	Cthrc1	chr15	+	39080482	39080704	0.00099009	0.0582634		ENSMUSG00000021066	Atl1	chr12	+	69932216	69934920	1	1
																		ENSMUSG00000069601	Ank3	chr10	+	69920437	69920491	0.000990334	0.0582634		ENSMUSG00000043866	Taf10	chr7	-	105743225	105743492	1	1
																		ENSMUSG00000036552	Ermard	chr17	+	15059765	15059984	0.000993477	0.0583729		ENSMUSG00000023191	P3h3	chr6	-	124850917	124851131	0.43211	1
																		ENSMUSG00000027357	Crls1	chr2	+	132861208	132861294	0.000996384	0.0584682		ENSMUSG00000030871	Ears2	chr7	-	122044301	122044666	0.834106	1
																		ENSMUSG00000053091	Lins1	chr7	+	66708638	66708743	0.00100503	0.0588995		ENSMUSG00000030871	Ears2	chr7	-	122046623	122048574	0.171591	1
																		ENSMUSG00000042129	Rassf4	chr6	-	116641684	116641786	0.00101022	0.0589973		ENSMUSG00000026289	Atg16l1	chr1	+	87785875	87786346	0.867185	1
																		ENSMUSG00000043987	Cep164	chr9	-	45785777	45785921	0.00101058	0.0589973		ENSMUSG00000020752	Recql5	chr11	-	115893946	115894718	1	1
																		ENSMUSG00000046873	Mbtps2	chrX	-	157593724	157593873	0.0010082	0.0589973		ENSMUSG00000047675	Rps8	chr4	-	117155007	117155677	1	1
																		ENSMUSG00000014599	Csf1	chr3	-	107756988	107757128	0.0010164	0.0592606		ENSMUSG00000021639	Gtf2h2	chr13	-	100486070	100486524	0.261949	1
																		ENSMUSG00000093752	Gm20716	chr2	-	168219219	168219245	0.0010177	0.0592606		ENSMUSG00000033460	Armcx1	chrX	+	134718369	134718818	1	1
																		ENSMUSG00000038957	Edc3	chr9	+	57712379	57712475	0.00102092	0.0593378		ENSMUSG00000026889	Rbm18	chr2	-	36134134	36136611	1	1
																		ENSMUSG00000029869	Ephb6	chr6	+	41617626	41617679	0.00102163	0.0593378		ENSMUSG00000041674	BC006965	chr11	-	112691291	112691714	0.956727	1
																		ENSMUSG00000030067	Foxp1	chr6	-	99520596	99520732	0.00102523	0.0593956		ENSMUSG00000037112	Sik2	chr9	-	50892800	50895961	1	1
																		ENSMUSG00000020919	Stat5b	chr11	-	100794543	100794636	0.00102474	0.0593956		ENSMUSG00000019368	Sec14l4	chr11	+	4043286	4043759	1	1
																		ENSMUSG00000032059	Alg9	chr9	+	50792062	50792150	0.00102662	0.0594005		ENSMUSG00000019368	Sec14l4	chr11	+	4043652	4043972	1	1
																		ENSMUSG00000020718	Polg2	chr11	-	106778716	106778807	0.0010404	0.0599694		ENSMUSG00000073434	Wdr90	chr17	-	25849562	25849970	0.576369	1
																		ENSMUSG00000038005	Hpf1	chr8	+	60896737	60896836	0.00103977	0.0599694		ENSMUSG00000073434	Wdr90	chr17	-	25854529	25855234	1	1
																		ENSMUSG00000034377	Tulp4	chr17	+	6118295	6118366	0.00103824	0.0599694		ENSMUSG00000073434	Wdr90	chr17	-	25860371	25860817	1	1
																		ENSMUSG00000024613	Tcof1	chr18	-	60827339	60827447	0.00104548	0.0601858		ENSMUSG00000028678	Kif2c	chr4	-	117177920	117178246	1	1
																		ENSMUSG00000017548	Suz12	chr11	+	79999056	79999125	0.00105377	0.0604979		ENSMUSG00000026803	Ttf1	chr2	+	29069891	29071376	1	1
																		ENSMUSG00000032754	Slc8b1	chr5	+	120529509	120529663	0.0010534	0.0604979		ENSMUSG00000020598	Nrcam	chr12	+	44544724	44546824	1	1
																		ENSMUSG00000037740	Mrps26	chr2	+	130564080	130564431	0.00105489	0.0604979		ENSMUSG00000003039	Fam32a	chr8	+	72219940	72221981	1	1
																		ENSMUSG00000030545	Pex11a	chr7	-	79740164	79740280	0.001057	0.0605428		ENSMUSG00000033540	Idua	chr5	+	108680110	108680497	1	1
																		ENSMUSG00000042472	Zfp410	chr12	+	84340101	84340229	0.00106795	0.061093		ENSMUSG00000002496	Tsc2	chr17	-	24597045	24597283	0.669376	1
																		ENSMUSG00000041827	Oasl1	chr5	+	114932722	114932964	0.00107444	0.0612384		ENSMUSG00000026437	Cdk18	chr1	-	132116446	132116701	0.741204	1
																		ENSMUSG00000041119	Pde9a	chr17	+	31470680	31470809	0.00107452	0.0612384		ENSMUSG00000068876	Cgn	chr3	-	94777993	94778270	0.684868	1
																		ENSMUSG00000038084	Opa1	chr16	+	29588822	29588876	0.00107348	0.0612384		ENSMUSG00000021494	Ddx41	chr13	-	55535729	55536045	1	1
																		ENSMUSG00000060147	Serpinb6a	chr13	-	33935618	33935794	0.00108377	0.0615341		ENSMUSG00000021494	Ddx41	chr13	-	55535885	55536406	0.177071	1
																		ENSMUSG00000042793	Lgr6	chr1	-	135021774	135021846	0.00108365	0.0615341		ENSMUSG00000044252	Osbpl1a	chr18	-	12755327	12756307	0.435854	1
																		ENSMUSG00000020385	Clk4	chr11	+	51268164	51268231	0.00108347	0.0615341		ENSMUSG00000029149	Krtcap3	chr5	+	31252191	31252571	0.893503	1
																		ENSMUSG00000048234	Rnf149	chr1	-	39558314	39558411	0.00109095	0.0618649		ENSMUSG00000004268	Emg1	chr6	-	124704938	124705216	0.880106	1
																		ENSMUSG00000012535	Tnpo3	chr6	-	29571035	29571127	0.00110232	0.0624319		ENSMUSG00000032586	Traip	chr9	+	107962830	107963417	1	1
																		ENSMUSG00000074579	Lekr1	chr3	+	65669503	65669613	0.00111267	0.0628619		ENSMUSG00000053746	Ptrh1	chr2	+	32776303	32776806	0.921608	1
																		ENSMUSG00000029599	Ddx54	chr5	+	120620257	120620379	0.00111228	0.0628619		ENSMUSG00000021428	Riok1	chr13	+	38058687	38060092	1	1
																		ENSMUSG00000039158	Akna	chr4	-	63370891	63371011	0.00112079	0.0628703		ENSMUSG00000004677	Myo9b	chr8	+	71348330	71349194	1	1
																		ENSMUSG00000041143	Tmco4	chr4	+	139053899	139054017	0.00111836	0.0628703		ENSMUSG00000020669	Sh3yl1	chr12	+	30941966	30942868	0.911313	1
																		ENSMUSG00000090258	Churc1	chr12	+	76773257	76773393	0.00111878	0.0628703		ENSMUSG00000015750	Aph1a	chr3	+	95895142	95895570	1	1
																		ENSMUSG00000028469	Npr2	chr4	+	43641548	43641633	0.00111756	0.0628703		ENSMUSG00000022579	Gpihbp1	chr15	+	75597030	75597629	1	1
																		ENSMUSG00000021302	Ggps1	chr13	-	14059318	14059453	0.00111996	0.0628703		ENSMUSG00000012848	Rps5	chr7	+	12925736	12926494	1	1
																		ENSMUSG00000003134	Tbc1d8	chr1	-	39385120	39385238	0.00112111	0.0628703		ENSMUSG00000038412	Higd1a	chr9	-	121848562	121850322	1	1
																		ENSMUSG00000036555	Iqce	chr5	-	140675077	140675248	0.00112268	0.062881		ENSMUSG00000040669	Phc1	chr6	-	122321871	122322472	0.546712	1
																		ENSMUSG00000064307	Lrrc51	chr7	-	101921503	101921566	0.00112446	0.0629037		ENSMUSG00000074129	Rpl13a	chr7	-	45126990	45127274	1	1
																		ENSMUSG00000042202	Slc35e2	chr4	+	155616182	155616255	0.00112593	0.0629086		ENSMUSG00000074129	Rpl13a	chr7	-	45126990	45127274	0.379767	1
																		ENSMUSG00000007812	Zfp655	chr5	+	145235305	145235391	0.00114595	0.06387		ENSMUSG00000025558	Dock9	chr14	-	121581331	121583540	1	1
																		ENSMUSG00000018727	Cpsf4l	chr11	-	113706416	113706569	0.0011451	0.06387		ENSMUSG00000004071	Cdip1	chr16	-	4768744	4769795	1	1
																		ENSMUSG00000081769	Gm12216	chr11	-	53804981	53805108	0.00115606	0.0643547		ENSMUSG00000004071	Cdip1	chr16	-	4768744	4769795	1	1
																		ENSMUSG00000044252	Osbpl1a	chr18	-	12841183	12841346	0.00115999	0.0644949		ENSMUSG00000034083	Ccdc174	chr6	+	91885347	91888250	1	1
																		ENSMUSG00000026245	Farsb	chr1	-	78476189	78476305	0.00116527	0.0647095		ENSMUSG00000031389	Arhgap4	chrX	-	73899844	73900469	1	1
																		ENSMUSG00000072704	Smim10l1	chr6	+	133107863	133107982	0.00116822	0.0647444		ENSMUSG00000031389	Arhgap4	chrX	-	73900098	73900469	1	1
																		ENSMUSG00000034269	Setd5	chr6	+	113105664	113105761	0.00116874	0.0647444		ENSMUSG00000031442	Mcf2l	chr8	+	13018695	13020505	0.18578	1
																		ENSMUSG00000037960	Card19	chr13	-	49205191	49205345	0.00117188	0.0648188		ENSMUSG00000034518	Hmgxb4	chr8	+	74999559	74999891	0.305333	1
																		ENSMUSG00000039842	Mcph1	chr8	+	18788238	18788476	0.00117293	0.0648188		ENSMUSG00000037321	Tap1	chr17	+	34189177	34190768	1	1
																		ENSMUSG00000037519	Ppfia1	chr7	-	144479026	144479097	0.00117555	0.0648442		ENSMUSG00000037321	Tap1	chr17	+	34192836	34192965	1	1
																		ENSMUSG00000014767	Tbp	chr17	+	15501153	15501202	0.00117624	0.0648442		ENSMUSG00000042447	Mios	chr6	+	8233049	8234361	1	1
																		ENSMUSG00000021000	Mia2	chr12	+	59146335	59146362	0.00117851	0.0648907		ENSMUSG00000032198	Dock6	chr9	-	21800179	21801332	1	1
																		ENSMUSG00000029577	Ube3b	chr5	+	114404539	114404715	0.00119628	0.0657899		ENSMUSG00000001062	Vps9d1	chr8	-	123245113	123245712	1	1
																		ENSMUSG00000029177	Cenpa	chr5	+	30668998	30669052	0.0012131	0.0666342		ENSMUSG00000001062	Vps9d1	chr8	-	123245113	123245712	1	1
																		ENSMUSG00000005936	Kctd20	chr17	+	28962809	28962912	0.00121647	0.0666585		ENSMUSG00000001062	Vps9d1	chr8	-	123248153	123248676	0.44519	1
																		ENSMUSG00000029512	Ulk1	chr5	-	110786299	110786435	0.0012151	0.0666585		ENSMUSG00000022946	Dopey2	chr16	+	93739153	93740674	0.736161	1
																		ENSMUSG00000035495	Tstd2	chr4	-	46137320	46137428	0.00122793	0.0672054		ENSMUSG00000025498	Irf7	chr7	-	141264492	141264783	0.945297	1
																		ENSMUSG00000089837	Npcd	chr15	-	79828687	79828978	0.00123728	0.0674738		ENSMUSG00000040506	Ambra1	chr2	+	91772290	91773747	0.490359	1
																		ENSMUSG00000079215	Zfp664	chr5	+	124863353	124863508	0.0012353	0.0674738		ENSMUSG00000007379	Dennd2c	chr3	+	103133214	103133851	0.336752	1
																		ENSMUSG00000021375	Kif13a	chr13	-	46760662	46760767	0.00123681	0.0674738		ENSMUSG00000037720	Tmem33	chr5	+	67260695	67261033	0.779296	1
																		ENSMUSG00000028841	Cnksr1	chr4	-	134233701	134233764	0.00124316	0.0677137		ENSMUSG00000037720	Tmem33	chr5	+	67286095	67291461	0.836389	1
																		ENSMUSG00000034430	Zxdc	chr6	+	90372786	90372865	0.00124665	0.0678226		ENSMUSG00000108414	Snhg1	chr19	+	8725781	8726102	0.412639	1
																		ENSMUSG00000024150	Mcfd2	chr17	-	87258749	87258881	0.00124966	0.0678663		ENSMUSG00000108414	Snhg1	chr19	+	8726066	8726443	0.489555	1
																		ENSMUSG00000059436	Max	chr12	-	76939429	76939514	0.00125044	0.0678663		ENSMUSG00000024325	Ring1	chr17	-	34021682	34023194	1	1
																		ENSMUSG00000037605	Adgrl3	chr5	+	81329756	81329960	0.00125529	0.0680486		ENSMUSG00000040667	Nup88	chr11	-	70943878	70944238	1	1
																		ENSMUSG00000018583	G3bp1	chr11	+	55487478	55487560	0.00125852	0.0681428		ENSMUSG00000063870	Chd4	chr6	+	125120204	125120556	0.884184	1
																		ENSMUSG00000033538	Casp4	chr9	+	5322819	5322917	0.0012654	0.068434		ENSMUSG00000079657	Rab26	chr17	-	24530054	24530443	1	1
																		ENSMUSG00000074272	Ceacam1	chr7	-	25464848	25466437	0.00128086	0.0691055		ENSMUSG00000027514	Zbp1	chr2	-	173210535	173212266	0.935508	1
																		ENSMUSG00000031711	Zfp330	chr8	-	82771338	82771358	0.00128066	0.0691055		ENSMUSG00000039515	Ptpa	chr2	+	30438228	30439764	1	1
																		ENSMUSG00000040183	Ankrd6	chr4	-	32815234	32815387	0.00128668	0.069219		ENSMUSG00000024906	Mus81	chr19	-	5483454	5483665	1	1
																		ENSMUSG00000002602	Axl	chr7	-	25773098	25773125	0.00128728	0.069219		ENSMUSG00000024906	Mus81	chr19	-	5485487	5486114	1	1
																		ENSMUSG00000024378	Stard4	chr18	-	33205050	33205165	0.00128752	0.069219		ENSMUSG00000026280	Atg4b	chr1	+	93775627	93778364	0.613769	1
																		ENSMUSG00000027104	Atf2	chr2	-	73870622	73870685	0.00128967	0.0692317		ENSMUSG00000026200	Glb1l	chr1	-	75208686	75209222	1	1
																		ENSMUSG00000022124	Fbxl3	chr14	-	103095192	103095541	0.0012908	0.0692317		ENSMUSG00000027371	Fahd2a	chr2	-	127438112	127438569	0.683153	1
																		ENSMUSG00000026087	Mrpl30	chr1	+	37892942	37893023	0.0013018	0.0697399		ENSMUSG00000030231	Plekha5	chr6	+	140593554	140597110	0.703793	1
																		ENSMUSG00000037740	Mrps26	chr2	+	130564080	130564227	0.00130431	0.069792		ENSMUSG00000018677	Slc25a39	chr11	-	102403632	102403872	0.889869	1
																		ENSMUSG00000008575	Nfib	chr4	-	82310302	82310391	0.00131436	0.0702474		ENSMUSG00000053470	Kdm3a	chr6	-	71620137	71620568	1	1
																		ENSMUSG00000035824	Tk2	chr8	-	104247646	104247684	0.00131704	0.0703081		ENSMUSG00000034255	Arhgap27	chr11	-	103338306	103338755	1	1
																		ENSMUSG00000014668	Chfr	chr5	+	110144771	110144987	0.00131926	0.0703241		ENSMUSG00000034255	Arhgap27	chr11	-	103338687	103339108	1	1
																		ENSMUSG00000020257	Wdr82	chr9	+	106183615	106183715	0.00132043	0.0703241		ENSMUSG00000005625	Psmd4	chr3	-	95032704	95033546	1	1
																		ENSMUSG00000057738	Sptan1	chr2	+	30014157	30014172	0.00132577	0.0705262		ENSMUSG00000005625	Psmd4	chr3	-	95033632	95034026	0.224133	1
																		ENSMUSG00000018858	Mrpl58	chr11	+	115409479	115409539	0.00132964	0.0706495		ENSMUSG00000005625	Psmd4	chr3	-	95033632	95034026	0.85405	1
																		ENSMUSG00000036644	Tbc1d9b	chr11	+	50161454	50161695	0.00133367	0.070668		ENSMUSG00000005625	Psmd4	chr3	-	95034941	95035924	0.132718	1
																		ENSMUSG00000034647	Ankrd12	chr17	-	66052953	66053091	0.00133337	0.070668		ENSMUSG00000025737	Wdr24	chr17	+	25827234	25827532	0.15267	1
																		ENSMUSG00000034442	Trmt5	chr12	-	73285903	73285975	0.00133465	0.070668		ENSMUSG00000026927	Sdccag3	chr2	-	26386654	26387671	0.164067	1
																		ENSMUSG00000000384	Tbrg4	chr11	-	6619971	6620221	0.00134083	0.0708305		ENSMUSG00000029363	Rfc5	chr5	-	117381835	117382465	1	1
																		ENSMUSG00000042625	Safb2	chr17	-	56567532	56567624	0.00134022	0.0708305		ENSMUSG00000020536	Llgl1	chr11	+	60712920	60714186	0.738037	1
																		ENSMUSG00000033763	Mtss1l	chr8	+	110737145	110737220	0.00135439	0.0714643		ENSMUSG00000025410	Dctn2	chr10	+	127277694	127278222	1	1
																		ENSMUSG00000042810	Krba1	chr6	+	48405233	48405389	0.00136017	0.0716862		ENSMUSG00000025410	Dctn2	chr10	+	127277866	127278222	1	1
																		ENSMUSG00000041057	Wdr43	chr17	+	71641286	71641418	0.00136832	0.071949		ENSMUSG00000045679	Pqlc3	chr12	-	16992277	16993573	0.650466	1
																		ENSMUSG00000042729	Wdr74	chr19	+	8735986	8736093	0.00136819	0.071949		ENSMUSG00000045679	Pqlc3	chr12	-	16997633	16997856	1	1
																		ENSMUSG00000034343	Ube2f	chr1	+	91279504	91279537	0.00137296	0.0721097		ENSMUSG00000045679	Pqlc3	chr12	-	16997633	16997856	0.434686	1
																		ENSMUSG00000026870	Cutal	chr2	+	34888121	34888171	0.00137777	0.0722789		ENSMUSG00000007034	Slc44a4	chr17	+	34917516	34918338	1	1
																		ENSMUSG00000024050	Wiz	chr17	-	32360037	32360427	0.00140096	0.0734109		ENSMUSG00000058254	Tspan7	chrX	+	10590135	10595354	1	1
																		ENSMUSG00000042677	Zc3h12a	chr4	-	125126605	125127082	0.00140549	0.0735636		ENSMUSG00000058254	Tspan7	chrX	+	10590135	10596605	1	1
																		ENSMUSG00000028521	Slc35d1	chr4	-	103205105	103205198	0.00141054	0.0737431		ENSMUSG00000025137	Pcyt2	chr11	-	120612000	120612601	0.22677	1
																		ENSMUSG00000053332	Gas5	chr1	+	161037287	161037547	0.00141944	0.0741234		ENSMUSG00000061028	Clasrp	chr7	-	19584469	19584823	0.299627	1
																		ENSMUSG00000032612	Usp4	chr9	+	108388276	108388380	0.0014317	0.0746778		ENSMUSG00000061028	Clasrp	chr7	-	19584469	19584823	0.939252	1
																		ENSMUSG00000025173	Wdr45b	chr11	-	121338556	121338644	0.0014347	0.0747489		ENSMUSG00000061028	Clasrp	chr7	-	19591992	19594552	1	1
																		ENSMUSG00000022840	Adcy5	chr16	+	35278494	35278517	0.00144316	0.0751037		ENSMUSG00000061028	Clasrp	chr7	-	19591992	19594552	1	1
																		ENSMUSG00000009418	Nav1	chr1	-	135463914	135463938	0.00144946	0.0752597		ENSMUSG00000015149	Sirt2	chr7	+	28785663	28785882	1	1
																		ENSMUSG00000017119	Nbr1	chr11	+	101577193	101577251	0.00144817	0.0752597		ENSMUSG00000073889	Il11ra1	chr4	+	41763824	41765121	1	1
																		ENSMUSG00000059263	Usp47	chr7	+	112082429	112082561	0.00145624	0.0755252		ENSMUSG00000073889	Il11ra1	chr4	+	41765274	41765552	1	1
																		ENSMUSG00000006800	Sulf2	chr2	-	166141713	166141766	0.00146744	0.0760199		ENSMUSG00000073889	Il11ra1	chr4	+	41765385	41766274	1	1
																		ENSMUSG00000054072	Iigp1	chr18	+	60382611	60382794	0.001472	0.0760827		ENSMUSG00000006498	Ptbp1	chr10	+	79858751	79859271	0.900051	1
																		ENSMUSG00000026921	Egfl7	chr2	+	26592117	26592241	0.00147145	0.0760827		ENSMUSG00000006498	Ptbp1	chr10	+	79858951	79859271	0.506741	1
																		ENSMUSG00000005610	Eif4g2	chr7	-	111080898	111080964	0.00148337	0.0765316		ENSMUSG00000006498	Ptbp1	chr10	+	79859351	79859712	1	1
																		ENSMUSG00000003123	Lipe	chr7	-	25384372	25384664	0.00148572	0.0765316		ENSMUSG00000028086	Fbxw7	chr3	+	84967439	84969301	1	1
																		ENSMUSG00000041115	Iqsec2	chrX	+	152216340	152216466	0.00148456	0.0765316		ENSMUSG00000025512	Chid1	chr7	-	141522608	141527705	1	1
																		ENSMUSG00000022887	Masp1	chr16	-	23476266	23476404	0.00149426	0.0768843		ENSMUSG00000001750	Tcirg1	chr19	-	3898547	3898875	1	1
																		ENSMUSG00000026020	Nop58	chr1	+	59692611	59692728	0.00150092	0.07714		ENSMUSG00000001750	Tcirg1	chr19	-	3901890	3902556	1	1
																		ENSMUSG00000022565	Plec	chr15	-	76178518	76181899	0.00150414	0.0772181		ENSMUSG00000001750	Tcirg1	chr19	-	3903045	3903428	1	1
																		ENSMUSG00000022052	Ppp2r2a	chr14	-	67038874	67038972	0.0015146	0.0776677		ENSMUSG00000019338	Zfp687	chr3	-	95006831	95008213	1	1
																		ENSMUSG00000060477	Irak2	chr6	+	113665702	113665846	0.0015172	0.0777133		ENSMUSG00000019338	Zfp687	chr3	-	95008379	95008917	0.807058	1
																		ENSMUSG00000026305	Lrrfip1	chr1	+	91093559	91093637	0.00151899	0.0777177		ENSMUSG00000019338	Zfp687	chr3	-	95008584	95009238	0.696118	1
																		ENSMUSG00000029290	Zfp326	chr5	+	105888700	105888839	0.00153022	0.0782046		ENSMUSG00000019338	Zfp687	chr3	-	95009342	95010222	0.712489	1
																		ENSMUSG00000025816	Sec61a2	chr2	-	5879616	5879700	0.00153308	0.078263		ENSMUSG00000022552	Sharpin	chr15	-	76347039	76347387	1	1
																		ENSMUSG00000037348	Paqr7	chr4	+	134500599	134500683	0.00154187	0.0786142		ENSMUSG00000022552	Sharpin	chr15	-	76347258	76347594	1	1
																		ENSMUSG00000025958	Creb1	chr1	+	64574072	64574255	0.00154342	0.0786142		ENSMUSG00000022552	Sharpin	chr15	-	76348085	76348435	1	1
																		ENSMUSG00000032228	Tcf12	chr9	-	72006700	72006762	0.00154639	0.0786774		ENSMUSG00000029103	Lrpap1	chr5	-	35097530	35098273	1	1
																		ENSMUSG00000028552	Eps15	chr4	+	109309124	109309220	0.00154811	0.0786774		ENSMUSG00000044894	Uqcrq	chr11	-	53430535	53430827	0.938354	1
																		ENSMUSG00000026754	Golga1	chr2	-	39048309	39048438	0.00155593	0.0789865		ENSMUSG00000025982	Sf3b1	chr1	-	55014482	55016490	0.205929	1
																		ENSMUSG00000079020	Slc45a4	chr15	-	73587520	73587724	0.00156384	0.0792995		ENSMUSG00000018433	Nol11	chr11	-	107180041	107181101	1	1
																		ENSMUSG00000035268	Pkig	chr2	+	163659149	163659235	0.00157706	0.0798811		ENSMUSG00000042390	Gatad2b	chr3	+	90354307	90355785	0.926412	1
																		ENSMUSG00000042121	Ssh1	chr5	-	113953252	113953299	0.00159455	0.0806772		ENSMUSG00000002058	Unc119	chr11	+	78347796	78348259	1	1
																		ENSMUSG00000029924	Slc37a3	chr6	-	39354976	39355122	0.00160244	0.0809863		ENSMUSG00000037376	Trmt6	chr2	-	132808203	132809016	1	1
																		ENSMUSG00000024780	Cdc37l1	chr19	+	29013810	29013953	0.00160525	0.0810385		ENSMUSG00000032185	Carm1	chr9	+	21587507	21589467	0.157619	1
																		ENSMUSG00000038965	Ube2l3	chr16	-	17176411	17176507	0.00161164	0.0812711		ENSMUSG00000032185	Carm1	chr9	+	21587850	21589467	0.202437	1
																		ENSMUSG00000013833	Med16	chr10	-	79907490	79907511	0.00161383	0.0812912		ENSMUSG00000023960	Enpp5	chr17	+	44080646	44081510	1	1
																		ENSMUSG00000074063	Osgin1	chr8	+	119442498	119442569	0.00161796	0.0814094		ENSMUSG00000022710	Usp7	chr16	-	8697892	8698586	0.873576	1
																		ENSMUSG00000041879	Ipo9	chr1	-	135426930	135427041	0.00163974	0.0824143		ENSMUSG00000041438	Utp4	chr8	+	106917581	106918805	0.839765	1
																		ENSMUSG00000029670	Ing3	chr6	+	21950037	21950109	0.0016504	0.0828583		ENSMUSG00000038762	Abcf1	chr17	-	35963125	35963392	1	1
																		ENSMUSG00000055762	Eef1d	chr15	-	75897225	75897282	0.00165427	0.0828701		ENSMUSG00000040146	Rgl3	chr9	-	21976738	21976977	0.419691	1
																		ENSMUSG00000031596	Slc7a2	chr8	+	40908397	40908534	0.00165413	0.0828701		ENSMUSG00000040146	Rgl3	chr9	-	21976738	21977276	0.345516	1
																		ENSMUSG00000021276	Cinp	chr12	-	110877222	110877372	0.00165959	0.0829708		ENSMUSG00000040146	Rgl3	chr9	-	21976738	21977429	1	1
																		ENSMUSG00000032897	Nfyc	chr4	-	120781471	120781543	0.00165993	0.0829708		ENSMUSG00000026309	Ilkap	chr1	-	91387214	91388464	0.65526	1
																		ENSMUSG00000034522	Zfp395	chr14	+	65388789	65388899	0.00167409	0.0835872		ENSMUSG00000026309	Ilkap	chr1	-	91387214	91388464	0.678112	1
																		ENSMUSG00000020087	Tysnd1	chr10	+	61699483	61699628	0.0016763	0.0836055		ENSMUSG00000025766	D3Ertd751e	chr3	+	41756048	41758939	1	1
																		ENSMUSG00000025184	R3hcc1l	chr19	+	42562551	42563075	0.00168454	0.0839227		ENSMUSG00000038644	Pold1	chr7	-	44533884	44534487	1	1
																		ENSMUSG00000039536	Stau1	chr2	-	166952325	166952472	0.00168634	0.0839227		ENSMUSG00000038644	Pold1	chr7	-	44535016	44535836	1	1
																		ENSMUSG00000024513	Mbd2	chr18	+	70594275	70594399	0.00168929	0.0839774		ENSMUSG00000053158	Fes	chr7	-	80379817	80380892	1	1
																		ENSMUSG00000014547	Wdfy2	chr14	+	62954860	62954969	0.00169794	0.0843157		ENSMUSG00000053158	Fes	chr7	-	80379817	80380892	1	1
																		ENSMUSG00000019088	Dnase1l1	chrX	-	74276478	74276556	0.00170515	0.0845815		ENSMUSG00000053158	Fes	chr7	-	80380208	80380892	1	1
																		ENSMUSG00000045875	Adra1a	chr14	+	66727445	66728000	0.00170912	0.0846862		ENSMUSG00000053158	Fes	chr7	-	80381164	80381810	1	1
																		ENSMUSG00000030815	Phkg2	chr7	+	127577974	127578029	0.00172071	0.0851675		ENSMUSG00000053158	Fes	chr7	-	80382810	80383189	1	1
																		ENSMUSG00000020513	Tubd1	chr11	+	86556694	86556787	0.00173175	0.0855557		ENSMUSG00000053158	Fes	chr7	-	80383069	80383406	1	1
																		ENSMUSG00000053886	Sh2d4a	chr8	+	68335064	68335195	0.00173606	0.0855557		ENSMUSG00000053158	Fes	chr7	-	80383833	80384287	1	1
																		ENSMUSG00000041654	Slc39a11	chr11	-	113591781	113591932	0.0017347	0.0855557		ENSMUSG00000068039	Tcp1	chr17	+	12918042	12919925	0.360978	1
																		ENSMUSG00000024002	Brd4	chr17	-	32253040	32253200	0.00173251	0.0855557		ENSMUSG00000038538	Ubn2	chr6	+	38487107	38491931	0.144831	1
																		ENSMUSG00000042772	Smg7	chr1	-	152843229	152843379	0.00174021	0.08558		ENSMUSG00000030435	U2af2	chr7	+	5068732	5069560	1	1
																		ENSMUSG00000037995	Igsf9	chr1	+	172484781	172484970	0.00174032	0.08558		ENSMUSG00000006154	Eps8l1	chr7	+	4477889	4478751	0.355463	1
																		ENSMUSG00000029263	Pigg	chr5	+	108338554	108338746	0.00174322	0.0856301		ENSMUSG00000019823	Mical1	chr10	+	41478009	41478635	1	1
																		ENSMUSG00000001768	Rin2	chr2	+	145851178	145851251	0.00175023	0.085882		ENSMUSG00000071337	Tia1	chr6	+	86423605	86424420	0.965634	1
																		ENSMUSG00000027244	Atg13	chr2	-	91679919	91679997	0.00175736	0.0861391		ENSMUSG00000002395	Use1	chr8	+	71367643	71367848	0.522339	1
																		ENSMUSG00000097487	Ptges3l	chr11	-	101419674	101419728	0.0017632	0.0863322		ENSMUSG00000002395	Use1	chr8	+	71368849	71369303	0.367905	1
																		ENSMUSG00000036873	2410004B18Rik	chr3	+	145938542	145938669	0.00176856	0.0865017		ENSMUSG00000061322	Dnaic1	chr4	+	41632139	41632488	0.860381	1
																		ENSMUSG00000073758	Sh3d21	chr4	-	126150876	126150934	0.00177662	0.0868028		ENSMUSG00000028975	Pex14	chr4	-	148967523	148970635	1	1
																		ENSMUSG00000000827	Tpd52l2	chr2	+	181499302	181499453	0.00178273	0.0869147		ENSMUSG00000027291	Vps39	chr2	-	120323032	120324289	1	1
																		ENSMUSG00000042520	Ubap2l	chr3	-	90001817	90001868	0.00178254	0.0869147		ENSMUSG00000015085	Entpd2	chr2	+	25399281	25399736	1	1
																		ENSMUSG00000029290	Zfp326	chr5	+	105888433	105888839	0.0017906	0.0872049		ENSMUSG00000070000	Fcho1	chr8	-	71708925	71709385	1	1
																		ENSMUSG00000062300	Nectin2	chr7	-	19719195	19719282	0.00179291	0.0872241		ENSMUSG00000070000	Fcho1	chr8	-	71717141	71717510	1	1
																		ENSMUSG00000038416	Cdc16	chr8	+	13758997	13759052	0.00179483	0.0872244		ENSMUSG00000068735	Trp53i11	chr2	+	93198894	93199458	1	1
																		ENSMUSG00000020087	Tysnd1	chr10	+	61699442	61699628	0.00180561	0.0876547		ENSMUSG00000036046	5031439G07Rik	chr15	-	84950611	84953321	1	1
																		ENSMUSG00000046223	Plaur	chr7	+	24474209	24474356	0.00181348	0.0879247		ENSMUSG00000019738	Polr2i	chr7	+	30232331	30232536	0.849261	1
																		ENSMUSG00000038267	Slc22a23	chr13	-	34195251	34195484	0.00181503	0.0879247		ENSMUSG00000019738	Polr2i	chr7	+	30232749	30232981	0.44636	1
																		ENSMUSG00000062300	Nectin2	chr7	-	19719432	19719496	0.00181719	0.0879359		ENSMUSG00000007610	Gtpbp3	chr8	+	71490334	71491590	1	1
																		ENSMUSG00000026502	Desi2	chr1	+	178198217	178198290	0.00182118	0.0880206		ENSMUSG00000029860	Zyx	chr6	+	42350032	42350476	0.599649	1
																		ENSMUSG00000023015	Racgap1	chr15	-	99643392	99643523	0.00182281	0.0880206		ENSMUSG00000029860	Zyx	chr6	+	42357851	42358392	0.143526	1
																		ENSMUSG00000090935	Synj2bp	chr12	-	81510828	81510965	0.00182693	0.0880299		ENSMUSG00000020608	Smc6	chr12	+	11291525	11294599	1	1
																		ENSMUSG00000024392	Bag6	chr17	+	35142497	35142605	0.00182502	0.0880299		ENSMUSG00000001627	Ifrd1	chr12	-	40217157	40217482	1	1
																		ENSMUSG00000027244	Atg13	chr2	-	91679919	91679997	0.0018288	0.0880299		ENSMUSG00000055024	Ep300	chr15	+	81639740	81640141	0.316369	1
																		ENSMUSG00000031714	Gab1	chr8	-	80776160	80776250	0.00183611	0.0881955		ENSMUSG00000029775	Klhdc10	chr6	+	30447940	30449630	1	1
																		ENSMUSG00000038506	Dcun1d2	chr8	-	13261384	13261467	0.00183564	0.0881955		ENSMUSG00000029782	Tmem209	chr6	-	30506785	30508512	1	1
																		ENSMUSG00000020307	Cdc34	chr10	+	79685232	79685367	0.00184107	0.0883402		ENSMUSG00000017754	Pltp	chr2	-	164852472	164852680	0.748639	1
																		ENSMUSG00000033819	Ppp1r16a	chr15	+	76693226	76693352	0.00186178	0.08924		ENSMUSG00000038119	Cdon	chr9	+	35463874	35464228	1	1
																		ENSMUSG00000030257	Srgap3	chr6	-	112773597	112773699	0.00186876	0.0894804		ENSMUSG00000030032	Wdr54	chr6	-	83153516	83154975	1	1
																		ENSMUSG00000053253	Ndfip2	chr14	+	105292231	105292365	0.00187093	0.08949		ENSMUSG00000021431	Snrnp48	chr13	+	38217373	38220776	1	1
																		ENSMUSG00000092232	Gm20521	chr14	+	54884373	54884813	0.00188094	0.0898746		ENSMUSG00000022241	Tars	chr15	-	11388080	11388460	1	1
																		ENSMUSG00000021277	Traf3	chr12	+	111166998	111167107	0.00188635	0.0900386		ENSMUSG00000022241	Tars	chr15	-	11391813	11392034	0.241403	1
																		ENSMUSG00000045983	Eif4g1	chr16	+	20673598	20673655	0.00189196	0.0901177		ENSMUSG00000003271	Sult2b1	chr7	-	45742053	45742483	1	1
																		ENSMUSG00000031792	Usb1	chr8	+	95338633	95338817	0.00189004	0.0901177		ENSMUSG00000031995	St14	chr9	-	31106013	31106874	0.45072	1
																		ENSMUSG00000035236	Scai	chr2	-	39150313	39150414	0.00189473	0.0901517		ENSMUSG00000067071	Hes6	chr1	-	91411482	91412802	0.623304	1
																		ENSMUSG00000059890	Ube4a	chr9	-	44956541	44956725	0.00189862	0.0901517		ENSMUSG00000067071	Hes6	chr1	-	91412720	91412979	1	1
																		ENSMUSG00000021738	Atxn7	chr14	+	14089195	14089455	0.0018973	0.0901517		ENSMUSG00000038618	Rassf7	chr7	+	141217885	141218168	0.538302	1
																		ENSMUSG00000026821	Ralgds	chr2	+	28543638	28543747	0.00190973	0.090585		ENSMUSG00000002249	Tead3	chr17	-	28335484	28336573	1	1
																		ENSMUSG00000020755	Sap30bp	chr11	+	115957360	115957449	0.00191997	0.0908811		ENSMUSG00000030512	Snrpa1	chr7	+	66069423	66070665	0.96707	1
																		ENSMUSG00000041757	Plekha6	chr1	+	133274792	133274879	0.00191851	0.0908811		ENSMUSG00000031578	Mak16	chr8	-	31166061	31166632	1	1
																		ENSMUSG00000061887	Ssbp3	chr4	+	107027216	107027297	0.0019286	0.0911885		ENSMUSG00000025159	Mms19	chr19	-	41945732	41947103	1	1
																		ENSMUSG00000036748	Cuedc2	chr19	-	46338312	46338420	0.00193047	0.0911885		ENSMUSG00000025159	Mms19	chr19	-	41949454	41949837	0.553585	1
																		ENSMUSG00000030451	Herc2	chr7	+	56202100	56202208	0.00193523	0.0913188		ENSMUSG00000042286	Stab1	chr14	-	31139506	31140267	1	1
																		ENSMUSG00000030304	Ergic2	chr6	-	148201415	148201486	0.00195805	0.0923001		ENSMUSG00000042286	Stab1	chr14	-	31139743	31140267	1	1
																		ENSMUSG00000037236	Matr3	chr18	+	35571842	35572935	0.00196025	0.0923081		ENSMUSG00000042286	Stab1	chr14	-	31139743	31140267	1	1
																		ENSMUSG00000023050	Map3k12	chr15	-	102508327	102508463	0.00196986	0.0926646		ENSMUSG00000042286	Stab1	chr14	-	31139925	31140267	1	1
																		ENSMUSG00000020528	Prpsap2	chr11	-	61761479	61761574	0.00197529	0.0927277		ENSMUSG00000042286	Stab1	chr14	-	31140355	31140720	0.54115	1
																		ENSMUSG00000024382	Ercc3	chr18	+	32261301	32261398	0.00197373	0.0927277		ENSMUSG00000042286	Stab1	chr14	-	31142957	31143267	1	1
																		ENSMUSG00000028062	Lamtor2	chr3	-	88552354	88552517	0.00197731	0.0927277		ENSMUSG00000046519	Golph3l	chr3	+	95617043	95619241	1	1
																		ENSMUSG00000063952	Brpf3	chr17	+	28828343	28828441	0.00198599	0.0930392		ENSMUSG00000047617	Paxx	chr2	-	25459484	25459859	0.760321	1
																		ENSMUSG00000078812	Eif5a	chr11	-	69920340	69920422	0.00199313	0.0931821		ENSMUSG00000047617	Paxx	chr2	-	25459774	25460357	0.627712	1
																		ENSMUSG00000024571	Gm16286	chr18	+	80210061	80210130	0.00199205	0.0931821		ENSMUSG00000047617	Paxx	chr2	-	25460444	25460715	0.774885	1
																		ENSMUSG00000019891	Dcbld1	chr10	+	52317031	52317151	0.00200112	0.0934593		ENSMUSG00000018559	Ctdnep1	chr11	+	69984253	69984534	0.918623	1
																		ENSMUSG00000037174	Elf2	chr3	-	51299782	51299885	0.00200629	0.0936051		ENSMUSG00000017221	Psmd3	chr11	+	98690462	98691019	1	1
																		ENSMUSG00000074272	Ceacam1	chr7	-	25466316	25466437	0.00202908	0.094512		ENSMUSG00000001962	Fam50a	chrX	+	74314863	74315572	1	1
																		ENSMUSG00000015659	Serac1	chr17	-	6061547	6061661	0.00202988	0.094512		ENSMUSG00000001962	Fam50a	chrX	+	74318814	74319098	0.44934	1
																		ENSMUSG00000061136	Prpf40a	chr2	-	53159262	53159316	0.00204019	0.0947979		ENSMUSG00000039456	Morc3	chr16	+	93862413	93862715	1	1
																		ENSMUSG00000024927	Rela	chr19	+	5641180	5641285	0.00203863	0.0947979		ENSMUSG00000027411	Vps16	chr2	+	130437914	130438225	0.860825	1
																		ENSMUSG00000028896	Rcc1	chr4	-	132337730	132337910	0.00205675	0.0954699		ENSMUSG00000004264	Phb2	chr6	+	124713983	124714959	1	1
																		ENSMUSG00000024949	Sf1	chr19	+	6375657	6375862	0.00207477	0.0962084		ENSMUSG00000004264	Phb2	chr6	+	124715953	124716430	0.658031	1
																		ENSMUSG00000027361	Gabpb1	chr2	-	126650067	126650181	0.00208078	0.0963891		ENSMUSG00000038975	Rabggtb	chr3	-	153910260	153910888	1	1
																		ENSMUSG00000038506	Dcun1d2	chr8	-	13258946	13259043	0.0020839	0.0964354		ENSMUSG00000038975	Rabggtb	chr3	-	153910260	153910888	1	1
																		ENSMUSG00000021224	Numb	chr12	-	83855439	83855524	0.00209266	0.0966449		ENSMUSG00000004562	Arhgef40	chr14	+	51987402	51989938	1	1
																		ENSMUSG00000001482	Def8	chr8	+	123446122	123446184	0.00209267	0.0966449		ENSMUSG00000030689	Ino80e	chr7	-	126857225	126857787	0.40647	1
																		ENSMUSG00000015222	Map2	chr1	+	66193118	66193181	0.00210133	0.0969463		ENSMUSG00000030689	Ino80e	chr7	-	126857225	126857787	1	1
																		ENSMUSG00000085936	2610307P16Rik	chr13	-	28608517	28608628	0.00212021	0.0977184		ENSMUSG00000030890	Ilk	chr7	+	105740512	105741043	1	1
																		ENSMUSG00000039768	Dnajc11	chr4	+	151969845	151969968	0.00212258	0.0977288		ENSMUSG00000030890	Ilk	chr7	+	105740770	105741043	0.969444	1
																		ENSMUSG00000022721	Trmt2a	chr16	+	18252125	18252248	0.00215724	0.0992245		ENSMUSG00000030890	Ilk	chr7	+	105741373	105741707	0.891501	1
																		ENSMUSG00000032376	Usp3	chr9	-	66566842	66566903	0.00216935	0.0996808		ENSMUSG00000114797	Gm49336	chr14	-	60240773	60242657	1	1
																											ENSMUSG00000028759	Hp1bp3	chr4	+	138225888	138228787	1	1
																											ENSMUSG00000020708	Psmc5	chr11	+	106262403	106262691	0.145558	1
																											ENSMUSG00000028542	Slc6a9	chr4	+	117864404	117864888	1	1
																											ENSMUSG00000024953	Prdx5	chr19	-	6907241	6908116	1	1
																											ENSMUSG00000035228	Ccdc106	chr7	+	5059495	5060785	1	1
																											ENSMUSG00000034771	Tle2	chr10	+	81580256	81580667	0.168368	1
																											ENSMUSG00000034771	Tle2	chr10	+	81580256	81581755	1	1
																											ENSMUSG00000034771	Tle2	chr10	+	81580256	81581755	1	1
																											ENSMUSG00000034771	Tle2	chr10	+	81582412	81582886	1	1
																											ENSMUSG00000034771	Tle2	chr10	+	81587091	81587800	1	1
																											ENSMUSG00000026791	Slc2a8	chr2	-	32974837	32976280	1	1
																											ENSMUSG00000026791	Slc2a8	chr2	-	32981360	32981883	1	1
																											ENSMUSG00000028521	Slc35d1	chr4	-	103213870	103214092	1	1
																											ENSMUSG00000041375	Ccdc9	chr7	-	16276726	16278538	1	1
																											ENSMUSG00000029175	Slc35f6	chr5	+	30655494	30656100	1	1
																											ENSMUSG00000021809	Nudt13	chr14	+	20306231	20307799	0.650172	1
																											ENSMUSG00000021819	Zswim8	chr14	+	20718759	20719225	1	1
																											ENSMUSG00000021819	Zswim8	chr14	+	20719379	20720036	1	1
																											ENSMUSG00000021819	Zswim8	chr14	+	20721170	20722029	0.295505	1
																											ENSMUSG00000021819	Zswim8	chr14	+	20722459	20723006	0.652543	1
																											ENSMUSG00000021819	Zswim8	chr14	+	20722459	20723006	1	1
																											ENSMUSG00000014786	Slc9a5	chr8	+	105356530	105357173	1	1
																											ENSMUSG00000048856	Slc25a47	chr12	+	108855293	108856815	1	1
																											ENSMUSG00000039356	Exosc2	chr2	+	31675838	31676736	1	1
																											ENSMUSG00000035325	Sec31a	chr5	-	100363376	100363947	0.903555	1
																											ENSMUSG00000051557	Pusl1	chr4	-	155891051	155891415	0.555955	1
																											ENSMUSG00000026705	Klhl20	chr1	-	161098262	161099285	1	1
																											ENSMUSG00000020477	Mrps24	chr11	-	5707297	5707555	0.121781	1
																											ENSMUSG00000002107	Celf2	chr2	-	6539704	6547213	1	1
																											ENSMUSG00000002107	Celf2	chr2	-	6604023	6607961	1	1
																											ENSMUSG00000020250	Txnrd1	chr10	+	82879205	82879865	1	1
																											ENSMUSG00000020250	Txnrd1	chr10	+	82881722	82884006	1	1
																											ENSMUSG00000027465	Tbc1d20	chr2	+	152307988	152308431	1	1
																											ENSMUSG00000020377	Ltc4s	chr11	-	50237193	50237440	1	1
																											ENSMUSG00000028954	Nub1	chr5	+	24694699	24695590	0.278629	1
																											ENSMUSG00000066150	Slc31a1	chr4	+	62387866	62391769	1	1
																											ENSMUSG00000017119	Nbr1	chr11	+	101574998	101575416	0.25046	1
																											ENSMUSG00000022681	Ntan1	chr16	+	13826882	13827125	0.686263	1
																											ENSMUSG00000020184	Mdm2	chr10	-	117694904	117696439	0.205738	1
																											ENSMUSG00000033105	Lss	chr10	+	76535558	76536365	1	1
																											ENSMUSG00000033105	Lss	chr10	+	76544464	76545501	1	1
																											ENSMUSG00000036023	Parp2	chr14	+	50814869	50815427	0.622756	1
																											ENSMUSG00000036023	Parp2	chr14	+	50814869	50816299	1	1
																											ENSMUSG00000020463	Ppp4r3b	chr11	+	29218455	29220797	0.312587	1
																											ENSMUSG00000037400	Atp11b	chr3	+	35837485	35839214	1	1
																											ENSMUSG00000063334	Krr1	chr10	+	111977111	111977398	1	1
																											ENSMUSG00000021661	Ankra2	chr13	+	98272771	98273918	0.835449	1
																											ENSMUSG00000053453	Thoc7	chr14	-	13953410	13954656	1	1
																											ENSMUSG00000020359	Phykpl	chr11	+	51592005	51592285	0.672986	1
																											ENSMUSG00000020359	Phykpl	chr11	+	51593603	51594141	0.263198	1
																											ENSMUSG00000030782	Tgfb1i1	chr7	+	128248017	128248472	1	1
																											ENSMUSG00000030782	Tgfb1i1	chr7	+	128248419	128248720	1	1
																											ENSMUSG00000030782	Tgfb1i1	chr7	+	128248419	128248720	1	1
																											ENSMUSG00000030782	Tgfb1i1	chr7	+	128248886	128249195	1	1
																											ENSMUSG00000037805	Rpl10a	chr17	+	28328966	28329522	0.835166	1
																											ENSMUSG00000037805	Rpl10a	chr17	+	28328966	28329522	0.463096	1
																											ENSMUSG00000028693	Nasp	chr4	-	116604162	116604814	0.885921	1
																											ENSMUSG00000032376	Usp3	chr9	-	66520272	66520727	1	1
																											ENSMUSG00000007458	M6pr	chr6	+	122313258	122315166	1	1
																											ENSMUSG00000025731	Mettl26	chr17	+	25876660	25877169	0.826008	1
																											ENSMUSG00000068744	Psrc1	chr3	+	108384235	108384431	0.608498	1
																											ENSMUSG00000033295	Ptprf	chr4	-	118211000	118211485	1	1
																											ENSMUSG00000032228	Tcf12	chr9	-	71868071	71870147	1	1
																											ENSMUSG00000002804	Nudt14	chr12	-	112938355	112938859	0.757185	1
																											ENSMUSG00000021917	Spcs1	chr14	-	31000677	31000903	0.897624	1
																											ENSMUSG00000021917	Spcs1	chr14	-	31000677	31000903	0.254876	1
																											ENSMUSG00000023262	Acy1	chr9	-	106434529	106434829	0.773615	1
																											ENSMUSG00000023262	Acy1	chr9	-	106434964	106435169	0.391104	1
																											ENSMUSG00000023262	Acy1	chr9	-	106436125	106436800	1	1
																											ENSMUSG00000036819	Jmjd4	chr11	+	59450674	59453645	0.648174	1
																											ENSMUSG00000039233	Tbce	chr13	-	14005787	14006007	0.59249	1
																											ENSMUSG00000068329	Htra2	chr6	-	83052697	83053070	1	1
																											ENSMUSG00000068329	Htra2	chr6	-	83052697	83053070	1	1
																											ENSMUSG00000068329	Htra2	chr6	-	83052697	83053070	0.492978	1
																											ENSMUSG00000068329	Htra2	chr6	-	83052697	83053070	0.28989	1
																											ENSMUSG00000073792	Alg6	chr4	+	99750728	99752885	1	1
																											ENSMUSG00000000902	Smarcb1	chr10	-	75904383	75906196	1	1
																											ENSMUSG00000029060	Mib2	chr4	-	155655521	155656305	0.178289	1
																											ENSMUSG00000029060	Mib2	chr4	-	155656912	155657314	0.921824	1
																											ENSMUSG00000029060	Mib2	chr4	-	155658893	155659265	0.341451	1
																											ENSMUSG00000025237	Parp6	chr9	+	59623917	59624433	0.663395	1
																											ENSMUSG00000025237	Parp6	chr9	+	59641023	59641810	0.368678	1
																											ENSMUSG00000072501	Phf20l1	chr15	+	66622760	66624099	0.228021	1
																											ENSMUSG00000061740	Cyp2d22	chr15	-	82373110	82373833	1	1
																											ENSMUSG00000061740	Cyp2d22	chr15	-	82373903	82374469	1	1
																											ENSMUSG00000030846	Tial1	chr7	-	128443806	128444404	1	1
																											ENSMUSG00000030846	Tial1	chr7	-	128446730	128447107	1	1
																											ENSMUSG00000028455	Stoml2	chr4	-	43028937	43029358	1	1
																											ENSMUSG00000009741	Ubp1	chr9	+	113955962	113956813	0.951214	1
																											ENSMUSG00000090231	Cfb	chr17	-	34856879	34857136	0.335136	1
																											ENSMUSG00000090231	Cfb	chr17	-	34856879	34857136	0.19204	1
																											ENSMUSG00000028737	Aldh4a1	chr4	+	139633714	139633989	1	1
																											ENSMUSG00000029547	Ints1	chr5	-	139775331	139775674	1	1
																											ENSMUSG00000026785	Pkn3	chr2	+	30079925	30080686	1	1
																											ENSMUSG00000104713	Gbp6	chr5	-	105280074	105280564	1	1
																											ENSMUSG00000033880	Lgals3bp	chr11	-	118398120	118398571	1	1
																											ENSMUSG00000029291	Rufy3	chr5	+	88614940	88616579	1	1
																											ENSMUSG00000006301	Tmbim1	chr1	-	74291430	74291734	0.325148	1
																											ENSMUSG00000006301	Tmbim1	chr1	-	74291694	74292888	0.685432	1
																											ENSMUSG00000028114	Mettl14	chr3	-	123368296	123371485	1	1
																											ENSMUSG00000110206	Flt3l	chr7	-	45132227	45134026	1	1
																											ENSMUSG00000110206	Flt3l	chr7	-	45132227	45134026	1	1
																											ENSMUSG00000040479	Dgkz	chr2	-	91933742	91934089	1	1
																											ENSMUSG00000038520	Tbc1d17	chr7	-	44841982	44842300	0.668811	1
																											ENSMUSG00000030180	Kdm5a	chr6	+	120427728	120428377	1	1
																											ENSMUSG00000041119	Pde9a	chr17	+	31459900	31460261	1	1
																											ENSMUSG00000019139	Isyna1	chr8	+	70594480	70594748	1	1
																											ENSMUSG00000019139	Isyna1	chr8	+	70594619	70594984	1	1
																											ENSMUSG00000019139	Isyna1	chr8	+	70595138	70595554	0.453241	1
																											ENSMUSG00000030763	Lcmt1	chr7	+	123421537	123422798	1	1
																											ENSMUSG00000030979	Uros	chr7	-	133690507	133691166	0.449741	1
																											ENSMUSG00000048307	Ankrd46	chr15	-	36483980	36486127	1	1
																											ENSMUSG00000021235	Coq6	chr12	+	84368142	84368709	0.837818	1
																											ENSMUSG00000021235	Coq6	chr12	+	84370255	84371031	0.499124	1
																											ENSMUSG00000021235	Coq6	chr12	+	84370255	84371031	1	1
																											ENSMUSG00000021235	Coq6	chr12	+	84370255	84371558	1	1
																											ENSMUSG00000005958	Ephb3	chr16	+	21214324	21214997	0.396884	1
																											ENSMUSG00000005958	Ephb3	chr16	+	21220419	21220894	1	1
																											ENSMUSG00000005958	Ephb3	chr16	+	21221864	21222304	1	1
																											ENSMUSG00000001909	Trmt1	chr8	+	84690516	84690947	1	1
																											ENSMUSG00000001909	Trmt1	chr8	+	84690516	84690947	1	1
																											ENSMUSG00000001909	Trmt1	chr8	+	84690516	84690947	0.43523	1
																											ENSMUSG00000001909	Trmt1	chr8	+	84690516	84690947	0.365135	1
																											ENSMUSG00000001909	Trmt1	chr8	+	84695427	84696975	1	1
																											ENSMUSG00000001909	Trmt1	chr8	+	84699340	84699786	1	1
																											ENSMUSG00000098234	Snhg6	chr1	-	9942024	9942391	1	1
																											ENSMUSG00000001520	Nrip2	chr6	+	128404934	128406572	0.801684	1
																											ENSMUSG00000001520	Nrip2	chr6	+	128407685	128408932	1	1
																											ENSMUSG00000028716	Pdzk1ip1	chr4	+	115088707	115089212	1	1
																											ENSMUSG00000028716	Pdzk1ip1	chr4	+	115088722	115089212	0.464573	1
																											ENSMUSG00000028716	Pdzk1ip1	chr4	+	115088707	115089212	1	1
																											ENSMUSG00000028716	Pdzk1ip1	chr4	+	115088722	115089212	0.802935	1
																											ENSMUSG00000044533	Rps2	chr17	+	24720272	24720731	1	1
																											ENSMUSG00000028552	Eps15	chr4	+	109361162	109361867	0.700984	1
																											ENSMUSG00000032178	Ilf3	chr9	+	21397968	21399250	1	1
																											ENSMUSG00000032178	Ilf3	chr9	+	21397968	21399250	1	1
																											ENSMUSG00000004626	Stxbp2	chr8	+	3633847	3634123	1	1
																											ENSMUSG00000031835	Mbtps1	chr8	-	119515577	119518279	1	1
																											ENSMUSG00000031835	Mbtps1	chr8	-	119538843	119541694	1	1
																											ENSMUSG00000019194	Scn1b	chr7	-	31116523	31117295	0.145563	1
																											ENSMUSG00000005299	Letm1	chr5	-	33745015	33746374	1	1
																											ENSMUSG00000024843	Chka	chr19	+	3889879	3892213	1	1
																											ENSMUSG00000041482	Piezo2	chr18	-	63021143	63022545	1	1
																											ENSMUSG00000073795	6430531B16Rik	chr7	-	139978033	139978723	1	1
																											ENSMUSG00000020362	Cnot6	chr11	-	49685086	49685352	0.401533	1
																											ENSMUSG00000020362	Cnot6	chr11	-	49685086	49685352	0.807759	1
																											ENSMUSG00000034908	Sidt2	chr9	-	45945143	45945359	0.591053	1
																											ENSMUSG00000004394	Tmed4	chr11	-	6274397	6274870	0.731888	1
																											ENSMUSG00000024858	Grk2	chr19	-	4287557	4287985	1	1
																											ENSMUSG00000024858	Grk2	chr19	-	4291238	4291641	0.262416	1
																											ENSMUSG00000025060	Slk	chr19	+	47622235	47622694	0.465719	1
																											ENSMUSG00000026958	Dpp7	chr2	-	25354892	25355721	0.812485	1
																											ENSMUSG00000026958	Dpp7	chr2	-	25355813	25356142	1	1
																											ENSMUSG00000021493	Pdlim7	chr13	-	55506305	55507366	0.156388	1
																											ENSMUSG00000021493	Pdlim7	chr13	-	55507329	55507624	0.889362	1
																											ENSMUSG00000029386	Tctn2	chr5	+	124598748	124599242	1	1
																											ENSMUSG00000022210	Dhrs4	chr14	+	55487092	55487311	0.495087	1
																											ENSMUSG00000020640	Itsn2	chr12	+	4711952	4712640	0.703526	1
																											ENSMUSG00000029730	Mcm7	chr5	-	138169348	138169724	1	1
																											ENSMUSG00000033436	Armcx2	chrX	-	134807453	134807725	1	1
																											ENSMUSG00000038346	Zfp384	chr6	+	125024032	125024552	0.807843	1
																											ENSMUSG00000038346	Zfp384	chr6	+	125024032	125024552	0.377647	1
																											ENSMUSG00000038346	Zfp384	chr6	+	125024032	125025082	0.643745	1
																											ENSMUSG00000038346	Zfp384	chr6	+	125024032	125025082	1	1
																											ENSMUSG00000035969	Rusc2	chr4	+	43426227	43427088	0.59181	1
																											ENSMUSG00000022199	Slc22a17	chr14	-	54907518	54908366	0.179918	1
																											ENSMUSG00000022199	Slc22a17	chr14	-	54907518	54908366	0.192643	1
																											ENSMUSG00000022199	Slc22a17	chr14	-	54912241	54913103	1	1
																											ENSMUSG00000030058	Copg1	chr6	+	87892632	87893953	1	1
																											ENSMUSG00000030058	Copg1	chr6	+	87902197	87904941	1	1
																											ENSMUSG00000030058	Copg1	chr6	+	87908535	87909802	1	1
																											ENSMUSG00000028467	Gba2	chr4	-	43566927	43567916	0.938217	1
																											ENSMUSG00000028467	Gba2	chr4	-	43569180	43569955	1	1
																											ENSMUSG00000028467	Gba2	chr4	-	43569180	43569955	0.300677	1
																											ENSMUSG00000028467	Gba2	chr4	-	43569488	43569955	1	1
																											ENSMUSG00000028467	Gba2	chr4	-	43570036	43570448	1	1
																											ENSMUSG00000027639	Samhd1	chr2	-	157099400	157101443	1	1
																											ENSMUSG00000017747	Ghdc	chr11	-	100768013	100768289	1	1
																											ENSMUSG00000027893	Ahcyl1	chr3	-	107673435	107675154	1	1
																											ENSMUSG00000086290	Snhg12	chr4	+	132310150	132310504	0.15409	1
																											ENSMUSG00000086290	Snhg12	chr4	+	132310150	132311024	0.429674	1
																											ENSMUSG00000031532	Saraf	chr8	+	34167718	34168611	1	1
																											ENSMUSG00000029208	Guf1	chr5	+	69556952	69558296	1	1
																											ENSMUSG00000029032	Arhgef16	chr4	-	154279697	154281019	0.792657	1
																											ENSMUSG00000029032	Arhgef16	chr4	-	154282005	154282645	1	1
																											ENSMUSG00000029032	Arhgef16	chr4	-	154282515	154282912	1	1
																											ENSMUSG00000029032	Arhgef16	chr4	-	154286918	154288013	0.830444	1
																											ENSMUSG00000053841	Txlna	chr4	-	129631279	129631710	0.350108	1
																											ENSMUSG00000032177	Pde4a	chr9	+	21191326	21192431	1	1
																											ENSMUSG00000031171	Ftsj1	chrX	-	8250395	8250638	1	1
																											ENSMUSG00000030824	Nucb1	chr7	-	45495221	45495613	0.872588	1
																											ENSMUSG00000027184	Caprin1	chr2	-	103775416	103775765	1	1
																											ENSMUSG00000018068	Ints2	chr11	-	86242912	86244629	1	1
																											ENSMUSG00000026197	Zfand2b	chr1	+	75168833	75169279	1	1
																											ENSMUSG00000026197	Zfand2b	chr1	+	75170538	75170753	0.935932	1
																											ENSMUSG00000036661	Dennd3	chr15	+	73568421	73568745	1	1
																											ENSMUSG00000031878	Nae1	chr8	-	104527377	104530116	0.485489	1
																											ENSMUSG00000016921	Srsf6	chr2	+	162931993	162933550	1	1
																											ENSMUSG00000051113	Fam71e1	chr7	+	44500149	44501133	1	1
																											ENSMUSG00000021893	Capn7	chr14	+	31370701	31371984	0.383941	1
																											ENSMUSG00000036932	Aifm1	chrX	-	48483154	48484635	1	1
																											ENSMUSG00000004100	Ppan	chr9	+	20889337	20889684	0.180643	1
																											ENSMUSG00000004100	Ppan	chr9	+	20891082	20891365	0.9095	1
																											ENSMUSG00000024903	Lao1	chr4	+	118967094	118967489	1	1
																											ENSMUSG00000090862	Rps13	chr7	-	116331511	116333774	1	1
																											ENSMUSG00000090862	Rps13	chr7	-	116332928	116333774	1	1
																											ENSMUSG00000028469	Npr2	chr4	+	43643605	43644187	0.850646	1
																											ENSMUSG00000028469	Npr2	chr4	+	43650148	43650492	1	1
																											ENSMUSG00000041945	Mfsd9	chr1	-	40784376	40786210	1	1
																											ENSMUSG00000054435	Gimap4	chr6	+	48690370	48692060	1	1
																											ENSMUSG00000054435	Gimap4	chr6	+	48690370	48692060	1	1
																											ENSMUSG00000025962	Fastkd2	chr1	+	63735462	63735968	1	1
																											ENSMUSG00000038084	Opa1	chr16	+	29614125	29615164	1	1
																											ENSMUSG00000023277	Twf2	chr9	+	106212731	106213063	1	1
																											ENSMUSG00000023277	Twf2	chr9	+	106214100	106214477	0.803241	1
																											ENSMUSG00000039637	Coro7	chr16	-	4634298	4634907	0.825267	1
																											ENSMUSG00000039637	Coro7	chr16	-	4634588	4634907	1	1
																											ENSMUSG00000030493	Faap24	chr7	-	35394974	35395376	1	1
																											ENSMUSG00000024048	Myl12a	chr17	-	70996109	70996895	1	1
																											ENSMUSG00000040455	Usp45	chr4	+	21834234	21837872	0.496234	1
																											ENSMUSG00000034911	Ushbp1	chr8	-	71395049	71395469	1	1
																											ENSMUSG00000005514	Por	chr5	+	135734382	135734706	1	1
																											ENSMUSG00000026672	Optn	chr2	-	5020641	5021481	0.196345	1
																											ENSMUSG00000064061	Dzip3	chr16	-	48935498	48937073	1	1
																											ENSMUSG00000021701	Plk2	chr13	+	110396275	110396720	1	1
																											ENSMUSG00000021701	Plk2	chr13	+	110398372	110398808	0.873322	1
																											ENSMUSG00000020680	Taf15	chr11	+	83504641	83505104	1	1
																											ENSMUSG00000034813	Grip1	chr10	+	119985473	119986484	1	1
																											ENSMUSG00000057193	Slc44a2	chr9	+	21342394	21342658	0.934582	1
																											ENSMUSG00000057193	Slc44a2	chr9	+	21342742	21343047	0.868222	1
																											ENSMUSG00000057193	Slc44a2	chr9	+	21347034	21347986	1	1
																											ENSMUSG00000032567	Aste1	chr9	+	105396544	105397858	1	1
																											ENSMUSG00000032567	Aste1	chr9	+	105396544	105397858	1	1
																											ENSMUSG00000022035	Ccdc25	chr14	+	65851616	65854177	1	1
																											ENSMUSG00000030057	Cnbp	chr6	-	87845121	87845557	1	1
																											ENSMUSG00000030057	Cnbp	chr6	-	87845121	87845557	0.237462	1
																											ENSMUSG00000030057	Cnbp	chr6	-	87845121	87845793	1	1
																											ENSMUSG00000030057	Cnbp	chr6	-	87845121	87845793	0.453747	1
																											ENSMUSG00000017210	Med24	chr11	-	98716413	98718142	0.522354	1
																											ENSMUSG00000040482	Dxo	chr17	+	34838547	34838907	1	1
																											ENSMUSG00000040482	Dxo	chr17	+	34838812	34839137	1	1
																											ENSMUSG00000047153	Khnyn	chr14	+	55885773	55887618	0.12153	1
																											ENSMUSG00000026860	Sh3glb2	chr2	-	30345698	30346453	1	1
																											ENSMUSG00000074578	Zfas1	chr2	+	167065158	167065480	0.754425	1
																											ENSMUSG00000018287	Spag7	chr11	-	70664319	70664667	1	1
																											ENSMUSG00000018287	Spag7	chr11	-	70664987	70665364	0.464593	1
																											ENSMUSG00000025579	Gaa	chr11	+	119273974	119274311	1	1
																											ENSMUSG00000029859	Epha1	chr6	-	42364536	42365120	0.33575	1
																											ENSMUSG00000036606	Plxnb2	chr15	-	89155548	89156385	0.613586	1
																											ENSMUSG00000026269	Rnpepl1	chr1	+	92916710	92917746	1	1
																											ENSMUSG00000026269	Rnpepl1	chr1	+	92916710	92917746	0.960315	1
																											ENSMUSG00000026269	Rnpepl1	chr1	+	92918017	92919103	0.580197	1
																											ENSMUSG00000026269	Rnpepl1	chr1	+	92918017	92919103	0.627412	1
																											ENSMUSG00000024948	Map4k2	chr19	+	6341743	6341967	1	1
																											ENSMUSG00000024948	Map4k2	chr19	+	6343801	6344079	1	1
																											ENSMUSG00000024948	Map4k2	chr19	+	6345576	6345836	1	1
																											ENSMUSG00000024948	Map4k2	chr19	+	6352774	6353190	1	1
																											ENSMUSG00000026821	Ralgds	chr2	+	28548112	28548505	0.829637	1
																											ENSMUSG00000026821	Ralgds	chr2	+	28549289	28550563	1	1
																											ENSMUSG00000005774	Rfx5	chr3	+	94956486	94956802	1	1
																											ENSMUSG00000005774	Rfx5	chr3	+	94957781	94961349	1	1
																											ENSMUSG00000010936	Vac14	chr8	+	110710317	110711711	1	1
																											ENSMUSG00000010936	Vac14	chr8	+	110712747	110715577	1	1
																											ENSMUSG00000079109	Pms2	chr5	+	143928098	143929042	1	1
																											ENSMUSG00000090266	Mettl23	chr11	+	116848900	116849300	0.532967	1
																											ENSMUSG00000066979	Bub3	chr7	+	131561536	131563485	1	1
																											ENSMUSG00000024913	Lrp5	chr19	-	3593515	3597480	1	1
																											ENSMUSG00000037552	Plekhg2	chr7	-	28370237	28371042	1	1
																											ENSMUSG00000037552	Plekhg2	chr7	-	28370237	28371042	1	1
																											ENSMUSG00000005881	Ergic3	chr2	+	156017796	156018279	1	1
																											ENSMUSG00000027752	Exosc8	chr3	-	54731074	54732745	1	1
																											ENSMUSG00000027752	Exosc8	chr3	-	54734102	54734332	0.377303	1
																											ENSMUSG00000031098	Syt8	chr7	+	142438893	142439280	1	1
																											ENSMUSG00000031098	Syt8	chr7	+	142438893	142439521	1	1
																											ENSMUSG00000038374	Rbm8a	chr3	+	96631431	96633791	1	1
																											ENSMUSG00000003575	Crtc1	chr8	-	70392921	70397954	1	1
																											ENSMUSG00000003360	Ddx23	chr15	-	98650143	98650818	0.719176	1
																											ENSMUSG00000034928	Rnf44	chr13	-	54683960	54684488	0.802834	1
																											ENSMUSG00000034928	Rnf44	chr13	-	54683960	54684488	0.516694	1
																											ENSMUSG00000034928	Rnf44	chr13	-	54683960	54684488	0.378002	1
																											ENSMUSG00000036966	Spryd3	chr15	-	102130277	102130790	1	1
																											ENSMUSG00000084786	Ubl5	chr9	+	20645192	20645489	0.362665	1
																											ENSMUSG00000031641	Cbr4	chr8	+	61489939	61491678	1	1
																											ENSMUSG00000019470	Xab2	chr8	-	3613158	3613499	0.176884	1
																											ENSMUSG00000028973	Abcb8	chr5	+	24405814	24406254	1	1
																											ENSMUSG00000023764	Sfi1	chr11	-	3133071	3135542	1	1
																											ENSMUSG00000023764	Sfi1	chr11	-	3134625	3135542	1	1
																											ENSMUSG00000032477	Cdc25a	chr9	+	109889710	109891856	1	1
																											ENSMUSG00000060671	Atp8b2	chr3	-	89946427	89946789	1	1
																											ENSMUSG00000060671	Atp8b2	chr3	-	89947803	89948235	0.465572	1
																											ENSMUSG00000022508	Bcl6	chr16	-	23968306	23971599	0.526816	1
																											ENSMUSG00000033166	Dis3	chr14	-	99087733	99088908	0.786179	1
																											ENSMUSG00000024160	Spsb3	chr17	+	24890567	24890935	0.966893	1
																											ENSMUSG00000040663	Clcf1	chr19	+	4220177	4223490	1	1
																											ENSMUSG00000035953	Tmem55b	chr14	-	50929005	50929307	0.367174	1
																											ENSMUSG00000025155	Dus1l	chr11	-	120793027	120793946	0.945325	1
																											ENSMUSG00000022556	Hsf1	chr15	+	76497767	76498048	0.684302	1
																											ENSMUSG00000035206	Sppl2b	chr10	+	80866499	80868708	0.787583	1
																											ENSMUSG00000022295	Atp6v1c1	chr15	+	38689124	38690659	1	1
																											ENSMUSG00000038524	Fchsd1	chr18	-	37963127	37963421	0.751711	1
																											ENSMUSG00000026349	Ccnt2	chr1	+	127791604	127795800	0.736284	1
																											ENSMUSG00000034570	Inpp5j	chr11	-	3501045	3501428	1	1
																											ENSMUSG00000028680	Plk3	chr4	-	117129959	117130405	1	1
																											ENSMUSG00000004267	Eno2	chr6	-	124762652	124763206	0.565187	1
																											ENSMUSG00000014873	Surf2	chr2	+	26917427	26919055	0.177115	1
																											ENSMUSG00000014873	Surf2	chr2	+	26917427	26919055	0.838657	1
																											ENSMUSG00000039629	Strip2	chr6	+	29931119	29931829	1	1
																											ENSMUSG00000057738	Sptan1	chr2	+	30029619	30030196	1	1
																											ENSMUSG00000032480	Dhx30	chr9	-	110084728	110085053	1	1
																											ENSMUSG00000032480	Dhx30	chr9	-	110085684	110086031	1	1
																											ENSMUSG00000032480	Dhx30	chr9	-	110086931	110087195	0.401928	1
																											ENSMUSG00000032480	Dhx30	chr9	-	110092315	110093159	1	1
																											ENSMUSG00000032480	Dhx30	chr9	-	110115035	110115582	0.86011	1
																											ENSMUSG00000032480	Dhx30	chr9	-	110115035	110115582	1	1
																											ENSMUSG00000093445	Lrch4	chr5	+	137633848	137634249	1	1
																											ENSMUSG00000002055	Spag5	chr11	+	78313512	78313939	1	1
																											ENSMUSG00000043716	Rpl7	chr1	-	16102691	16103334	1	1
																											ENSMUSG00000043716	Rpl7	chr1	-	16103167	16103684	1	1
																											ENSMUSG00000002342	Tmem161a	chr8	+	70180705	70181049	1	1
																											ENSMUSG00000028621	Cyb5rl	chr4	+	107068611	107070547	1	1
																											ENSMUSG00000026999	Nup35	chr2	+	80655948	80657353	1	1
																											ENSMUSG00000031812	Map1lc3b	chr8	+	121593489	121596092	1	1
																											ENSMUSG00000031812	Map1lc3b	chr8	+	121593489	121596092	0.755773	1
																											ENSMUSG00000032115	Hyou1	chr9	+	44387031	44387329	0.479843	1
																											ENSMUSG00000032115	Hyou1	chr9	+	44388277	44388604	1	1
																											ENSMUSG00000038564	Ift172	chr5	-	31285762	31286117	1	1
																											ENSMUSG00000022614	Lmf2	chr15	-	89352358	89352955	1	1
																											ENSMUSG00000026869	Psmd5	chr2	-	34856447	34857829	1	1
																											ENSMUSG00000026869	Psmd5	chr2	-	34865526	34866095	1	1
																											ENSMUSG00000022756	Slc7a4	chr16	-	17573555	17574586	0.889567	1
																											ENSMUSG00000022756	Slc7a4	chr16	-	17573945	17574586	0.825209	1
																											ENSMUSG00000022756	Slc7a4	chr16	-	17574951	17575965	0.706671	1
																											ENSMUSG00000024542	Cep192	chr18	+	67877955	67878660	1	1
																											ENSMUSG00000026409	Pfkfb2	chr1	-	130697696	130698743	0.352194	1
																											ENSMUSG00000002820	Atg4d	chr9	+	21268250	21268669	0.141963	1
																											ENSMUSG00000041264	Uspl1	chr5	+	149213351	149215434	0.399616	1
																											ENSMUSG00000027677	Ttc14	chr3	+	33800190	33800674	0.730427	1
																											ENSMUSG00000018387	Shroom1	chr11	+	53465495	53466256	1	1
																											ENSMUSG00000032594	Ip6k1	chr9	+	108044724	108045313	0.135132	1
																											ENSMUSG00000027284	Cdan1	chr2	-	120726176	120726795	1	1
																											ENSMUSG00000027284	Cdan1	chr2	-	120729688	120730099	0.700979	1
																											ENSMUSG00000020654	Adcy3	chr12	+	4210771	4211605	1	1
																											ENSMUSG00000029148	Nrbp1	chr5	+	31243762	31243991	0.955972	1
																											ENSMUSG00000029148	Nrbp1	chr5	+	31244165	31244559	0.722261	1
																											ENSMUSG00000029148	Nrbp1	chr5	+	31250089	31250365	0.360078	1
																											ENSMUSG00000042726	Trafd1	chr5	-	121373137	121374067	0.719713	1
																											ENSMUSG00000042726	Trafd1	chr5	-	121375015	121375872	1	1
																											ENSMUSG00000020745	Pafah1b1	chr11	-	74673948	74679614	0.87523	1
																											ENSMUSG00000020745	Pafah1b1	chr11	-	74684405	74686064	1	1
																											ENSMUSG00000018796	Acsl1	chr8	+	46511359	46513390	1	1
																											ENSMUSG00000031729	Ist1	chr8	-	109675375	109676850	0.246045	1
																											ENSMUSG00000070702	Csn1s1	chr5	+	87675610	87675997	1	1
																											ENSMUSG00000070702	Csn1s1	chr5	+	87677598	87678083	1	1
																											ENSMUSG00000032913	Lrig2	chr3	-	104465486	104467363	1	1
																											ENSMUSG00000062312	Erbb2	chr11	+	98432910	98433253	1	1
																											ENSMUSG00000013155	Enkd1	chr8	-	105704112	105704514	0.883686	1
																											ENSMUSG00000013155	Enkd1	chr8	-	105704350	105704760	1	1
																											ENSMUSG00000029017	Pmpcb	chr5	+	21743378	21746090	1	1
																											ENSMUSG00000029202	Pds5a	chr5	-	65627084	65627764	1	1
																											ENSMUSG00000020877	Scrn2	chr11	+	97032754	97033229	1	1
																											ENSMUSG00000030929	Eri2	chr7	-	119786738	119787485	1	1
																											ENSMUSG00000030929	Eri2	chr7	-	119790233	119791228	1	1
																											ENSMUSG00000026213	Stk11ip	chr1	+	75527057	75527466	1	1
																											ENSMUSG00000027804	Ppid	chr3	+	79595201	79597873	1	1
																											ENSMUSG00000033685	Ucp2	chr7	+	100494213	100496948	1	1
																											ENSMUSG00000042594	Sh2b3	chr5	-	121818464	121818854	0.263048	1
																											ENSMUSG00000042594	Sh2b3	chr5	-	121818464	121818854	0.142902	1
																											ENSMUSG00000031386	Hcfc1	chrX	-	73946709	73947050	0.37661	1
																											ENSMUSG00000020234	4930404N11Rik	chr10	-	81364541	81364980	1	1
																											ENSMUSG00000035673	Sbno2	chr10	-	80066830	80067394	1	1
																											ENSMUSG00000035673	Sbno2	chr10	-	80069281	80069707	1	1
																											ENSMUSG00000020964	Sel1l	chr12	-	91813831	91814693	1	1
																											ENSMUSG00000031387	Renbp	chrX	-	73929115	73930517	1	1
																											ENSMUSG00000006589	Aprt	chr8	-	122576118	122576621	0.921346	1
																											ENSMUSG00000006589	Aprt	chr8	-	122576118	122576621	1	1
																											ENSMUSG00000022489	Pde1b	chr15	+	103526983	103528344	1	1
																											ENSMUSG00000033191	Tie1	chr4	-	118478861	118479903	1	1
																											ENSMUSG00000013858	Tmem259	chr10	-	79977962	79978320	1	1
																											ENSMUSG00000013858	Tmem259	chr10	-	79978187	79978605	1	1
																											ENSMUSG00000013858	Tmem259	chr10	-	79977962	79978605	1	1
																											ENSMUSG00000013858	Tmem259	chr10	-	79978391	79978605	0.224095	1
																											ENSMUSG00000020706	Ftsj3	chr11	-	106250154	106250433	1	1
																											ENSMUSG00000022570	Tsta3	chr15	-	75925582	75925859	0.477703	1
																											ENSMUSG00000042303	Sgsm3	chr15	+	81003803	81004185	1	1
																											ENSMUSG00000042303	Sgsm3	chr15	+	81008288	81008908	0.729865	1
																											ENSMUSG00000078485	Plekhn1	chr4	-	156225525	156228316	0.337476	1
																											ENSMUSG00000030216	Wbp11	chr6	-	136825515	136826109	0.825248	1
																											ENSMUSG00000035967	Ints6l	chrX	+	56493038	56496734	0.181218	1
																											ENSMUSG00000036553	Sh3tc1	chr5	-	35699710	35700407	1	1
																											ENSMUSG00000031816	Mthfsd	chr8	-	121101423	121103004	1	1
																											ENSMUSG00000023025	Larp4	chr15	+	99987402	99990429	1	1
																											ENSMUSG00000022109	Med4	chr14	+	73516635	73517338	1	1
																											ENSMUSG00000060073	Psma3	chr12	+	70984492	70984745	1	1
																											ENSMUSG00000026121	Sema4c	chr1	-	36551725	36552149	0.902341	1
																											ENSMUSG00000024186	Rgs11	chr17	+	26203295	26203512	1	1
																											ENSMUSG00000055692	Tmem191c	chr16	+	17276633	17276887	1	1
																											ENSMUSG00000055692	Tmem191c	chr16	+	17276633	17277039	1	1
																											ENSMUSG00000055692	Tmem191c	chr16	+	17276961	17277250	0.669725	1
																											ENSMUSG00000055692	Tmem191c	chr16	+	17277341	17277592	0.164224	1
																											ENSMUSG00000055692	Tmem191c	chr16	+	17277341	17277891	1	1
																											ENSMUSG00000055692	Tmem191c	chr16	+	17277668	17277891	0.38802	1
																											ENSMUSG00000023110	Prmt5	chr14	-	54516105	54516615	1	1
																											ENSMUSG00000025473	Adam8	chr7	-	139984728	139985430	1	1
																											ENSMUSG00000025473	Adam8	chr7	-	139986302	139986808	1	1
																											ENSMUSG00000025473	Adam8	chr7	-	139987178	139987737	1	1
																											ENSMUSG00000002346	Slc25a42	chr8	-	70188832	70189577	1	1
																											ENSMUSG00000029003	Mad2l2	chr4	+	148140181	148140834	1	1
																											ENSMUSG00000062753	AI413582	chr17	-	27564148	27564410	1	1
																											ENSMUSG00000062753	AI413582	chr17	-	27564148	27564410	0.44242	1
																											ENSMUSG00000022394	L3mbtl2	chr15	+	81667158	81668763	1	1
																											ENSMUSG00000022394	L3mbtl2	chr15	+	81686939	81688305	1	1
																											ENSMUSG00000014075	Tctex1d2	chr16	+	32425240	32426921	1	1
																											ENSMUSG00000029033	Acap3	chr4	+	155903310	155903858	1	1
																											ENSMUSG00000029033	Acap3	chr4	+	155903310	155903858	0.57284	1
																											ENSMUSG00000005575	Ube2m	chr7	-	13035237	13036315	0.857241	1
																											ENSMUSG00000024454	Hdac3	chr18	-	37940952	37941766	1	1
																											ENSMUSG00000024454	Hdac3	chr18	-	37940952	37941766	0.225937	1
																											ENSMUSG00000024454	Hdac3	chr18	-	37943677	37944209	0.88565	1
																											ENSMUSG00000042272	Sestd1	chr2	-	77198288	77199060	1	1
																											ENSMUSG00000033799	Fam208b	chr13	-	3599938	3600334	1	1
																											ENSMUSG00000029528	Pxn	chr5	+	115545371	115545805	1	1
																											ENSMUSG00000028101	Pias3	chr3	+	96699419	96699837	1	1
																											ENSMUSG00000024914	Drap1	chr19	-	5423330	5423653	1	1
																											ENSMUSG00000010110	Stx5a	chr19	+	8743079	8743423	0.694353	1
																											ENSMUSG00000010110	Stx5a	chr19	+	8748654	8748888	0.237888	1
																											ENSMUSG00000027714	Exosc9	chr3	+	36553805	36554142	1	1
																											ENSMUSG00000033416	Gucd1	chr10	-	75509591	75510123	1	1
																											ENSMUSG00000033416	Gucd1	chr10	-	75509591	75510123	1	1
																											ENSMUSG00000033416	Gucd1	chr10	-	75509591	75510123	0.246868	1
																											ENSMUSG00000026199	Ankzf1	chr1	+	75194840	75195712	1	1
																											ENSMUSG00000026199	Ankzf1	chr1	+	75195062	75195712	1	1
																											ENSMUSG00000026199	Ankzf1	chr1	+	75195062	75195712	0.427962	1
																											ENSMUSG00000026199	Ankzf1	chr1	+	75195800	75196381	0.31403	1
																											ENSMUSG00000026199	Ankzf1	chr1	+	75197643	75198376	1	1
																											ENSMUSG00000029599	Ddx54	chr5	+	120620257	120620758	1	1
																											ENSMUSG00000029599	Ddx54	chr5	+	120624537	120625844	1	1
																											ENSMUSG00000029599	Ddx54	chr5	+	120625925	120626505	1	1
																											ENSMUSG00000040532	Abhd11	chr5	+	135010886	135011380	0.300797	1
																											ENSMUSG00000040532	Abhd11	chr5	+	135010886	135011380	0.555705	1
																											ENSMUSG00000040532	Abhd11	chr5	+	135011483	135012170	1	1
																											ENSMUSG00000027246	Ell3	chr2	-	121440115	121440426	1	1
																											ENSMUSG00000026211	Obsl1	chr1	-	75502912	75503618	1	1
																											ENSMUSG00000017999	Ddx27	chr2	+	167020499	167020714	0.592905	1
																											ENSMUSG00000028453	Fancg	chr4	-	43003226	43003932	1	1
																											ENSMUSG00000028453	Fancg	chr4	-	43003226	43003932	1	1
																											ENSMUSG00000028453	Fancg	chr4	-	43006983	43007403	1	1
																											ENSMUSG00000035024	Ncapd3	chr9	+	27048154	27050369	1	1
																											ENSMUSG00000030805	Stx4a	chr7	+	127846019	127846276	0.683622	1
																											ENSMUSG00000030272	Camk1	chr6	-	113338279	113339581	1	1
																											ENSMUSG00000030272	Camk1	chr6	-	113339284	113339581	1	1
																											ENSMUSG00000021259	Cyp46a1	chr12	+	108345573	108346175	1	1
																											ENSMUSG00000029661	Col1a2	chr6	+	4508939	4509639	1	1
																											ENSMUSG00000029661	Col1a2	chr6	+	4534580	4535488	1	1
																											ENSMUSG00000062175	Tgif2	chr2	+	156853128	156855570	0.391534	1
																											ENSMUSG00000025728	Pigq	chr17	-	25931673	25932231	1	1
																											ENSMUSG00000071866	Ppia	chr11	+	6418100	6418314	1	1
																											ENSMUSG00000029146	Snx17	chr5	+	31195745	31196041	0.883813	1
																											ENSMUSG00000029146	Snx17	chr5	+	31195950	31196264	1	1
																											ENSMUSG00000093803	Ppp2r3d	chr9	-	124439587	124440122	1	1
																											ENSMUSG00000018907	Alox12e	chr11	-	70320729	70321139	1	1
																											ENSMUSG00000036452	Arhgap26	chr18	+	39357552	39357828	1	1
																											ENSMUSG00000019467	Arhgef25	chr10	-	127183197	127183829	1	1
																											ENSMUSG00000019467	Arhgef25	chr10	-	127184391	127184713	1	1
																											ENSMUSG00000035890	Rnf126	chr10	-	79761429	79761633	0.414843	1
																											ENSMUSG00000041361	Myzap	chr9	-	71552238	71555737	1	1
																											ENSMUSG00000029617	Ccz1	chr5	-	143998162	143998605	0.877881	1
																											ENSMUSG00000029617	Ccz1	chr5	-	144011030	144011529	0.339889	1
																											ENSMUSG00000028089	Chd1l	chr3	-	97587110	97588313	1	1
																											ENSMUSG00000002014	Ssr4	chrX	+	73787183	73788953	1	1
																											ENSMUSG00000020397	Med7	chr11	+	46439805	46439975	1	1
																											ENSMUSG00000034610	Zcchc11	chr4	+	108557321	108559415	1	1
																											ENSMUSG00000041679	Lrrc29	chr8	-	105313044	105313564	0.858222	1
																											ENSMUSG00000012126	Ubxn11	chr4	+	134123841	134124954	1	1
																											ENSMUSG00000024327	Slc39a7	chr17	-	34030089	34030421	0.327687	1
																											ENSMUSG00000021281	Tnfaip2	chr12	+	111448246	111448639	1	1
																											ENSMUSG00000021281	Tnfaip2	chr12	+	111448246	111448639	1	1
																											ENSMUSG00000028410	Dnaja1	chr4	+	40726104	40728183	1	1
																											ENSMUSG00000034994	Eef2	chr10	+	81181227	81181625	1	1
																											ENSMUSG00000029772	Ahcyl2	chr6	+	29906507	29906759	0.506706	1
																											ENSMUSG00000020260	Pofut2	chr10	+	77265835	77267093	1	1
																											ENSMUSG00000020260	Pofut2	chr10	+	77265835	77267093	0.6798	1
																											ENSMUSG00000034006	Pqlc1	chr18	+	80256306	80257118	0.59177	1
																											ENSMUSG00000029012	Orc5	chr5	-	22526362	22526583	1	1
																											ENSMUSG00000024190	Dusp1	chr17	-	26506984	26507719	0.513715	1
																											ENSMUSG00000027263	Tubgcp4	chr2	+	121189361	121189965	1	1
																											ENSMUSG00000027263	Tubgcp4	chr2	+	121189361	121189965	1	1
																											ENSMUSG00000022833	Ccdc14	chr16	+	34705160	34706897	1	1
																											ENSMUSG00000006998	Psmd2	chr16	+	20659678	20660102	1	1
																											ENSMUSG00000039244	E130309D02Rik	chr5	-	143311710	143314399	1	1
																											ENSMUSG00000024516	Sec11c	chr18	+	65812664	65814957	0.835839	1
																											ENSMUSG00000024516	Sec11c	chr18	+	65812664	65814957	1	1
																											ENSMUSG00000003345	Csnk1g2	chr10	+	80638009	80638309	0.482158	1
																											ENSMUSG00000029071	Dvl1	chr4	+	155854565	155854800	0.881754	1
																											ENSMUSG00000029071	Dvl1	chr4	+	155854565	155855025	0.277308	1
																											ENSMUSG00000029071	Dvl1	chr4	+	155854565	155855180	1	1
																											ENSMUSG00000029071	Dvl1	chr4	+	155854565	155855180	0.775365	1
																											ENSMUSG00000016503	Gtf3a	chr5	+	146953226	146954077	0.889113	1
																											ENSMUSG00000048495	Tyw5	chr1	-	57393349	57394091	1	1
																											ENSMUSG00000039110	Mycbpap	chr11	-	94512227	94512777	1	1
																											ENSMUSG00000009687	Fxyd5	chr7	-	31032729	31033018	0.737329	1
																											ENSMUSG00000009687	Fxyd5	chr7	-	31032729	31035283	1	1
																											ENSMUSG00000046671	Mtfr1l	chr4	-	134530274	134530789	0.888606	1
																											ENSMUSG00000029062	Cdk11b	chr4	+	155625530	155625773	0.124143	1
																											ENSMUSG00000073422	H2-Ke6	chr17	-	34026032	34026470	1	1
																											ENSMUSG00000073422	H2-Ke6	chr17	-	34026850	34027101	1	1
																											ENSMUSG00000073422	H2-Ke6	chr17	-	34027405	34027840	1	1
																											ENSMUSG00000004846	Plod3	chr5	+	136990150	136990539	1	1
																											ENSMUSG00000004846	Plod3	chr5	+	136991543	136992088	1	1
																											ENSMUSG00000024924	Vldlr	chr19	+	27217019	27217696	1	1
																											ENSMUSG00000028248	Pnisr	chr4	+	21869515	21870405	0.439838	1
																											ENSMUSG00000034101	Ctnnd1	chr2	-	84608328	84609074	1	1
																											ENSMUSG00000075590	Nrbp2	chr15	-	76090245	76090542	0.325237	1
																											ENSMUSG00000036555	Iqce	chr5	-	140674336	140677506	1	1
																											ENSMUSG00000008845	Cd163	chr6	+	124327897	124329097	1	1
																											ENSMUSG00000008845	Cd163	chr6	+	124327897	124329097	1	1
																											ENSMUSG00000019518	Ap4m1	chr5	+	138172348	138172893	1	1
																											ENSMUSG00000019518	Ap4m1	chr5	+	138176051	138176263	1	1
																											ENSMUSG00000031918	Mtmr2	chr9	+	13799149	13800082	1	1
																											ENSMUSG00000025236	Adpgk	chr9	+	59310227	59313236	1	1
																											ENSMUSG00000063884	Ptcd3	chr6	-	71883443	71884625	1	1
																											ENSMUSG00000063884	Ptcd3	chr6	-	71883443	71884625	0.449481	1
																											ENSMUSG00000021916	Glt8d1	chr14	+	31009734	31010165	1	1
																											ENSMUSG00000021916	Glt8d1	chr14	+	31010080	31010409	0.846766	1
																											ENSMUSG00000021916	Glt8d1	chr14	+	31010863	31011233	1	1
																											ENSMUSG00000021916	Glt8d1	chr14	+	31010863	31011233	1	1
																											ENSMUSG00000038241	Cep250	chr2	+	155988311	155989620	1	1
																											ENSMUSG00000022437	Samm50	chr15	+	84200292	84200717	1	1
																											ENSMUSG00000030603	Psmc4	chr7	-	28042338	28042726	0.815917	1
																											ENSMUSG00000057177	Gsk3a	chr7	-	25229464	25230040	1	1
																											ENSMUSG00000025583	Rptor	chr11	+	119856266	119857453	1	1
																											ENSMUSG00000025583	Rptor	chr11	+	119894255	119895005	1	1
																											ENSMUSG00000020806	Rhbdf2	chr11	-	116605242	116606232	1	1
																											ENSMUSG00000024170	Telo2	chr17	-	25106771	25107130	0.709901	1
																											ENSMUSG00000023153	Tmem52	chr4	+	155469302	155469503	1	1
																											ENSMUSG00000023153	Tmem52	chr4	+	155469302	155469503	1	1
																											ENSMUSG00000064307	Lrrc51	chr7	-	101912988	101913583	0.377147	1
																											ENSMUSG00000064307	Lrrc51	chr7	-	101915561	101915767	1	1
																											ENSMUSG00000020949	Fkbp3	chr12	-	65063677	65069109	1	1
																											ENSMUSG00000031583	Wrn	chr8	-	33342976	33343692	1	1
																											ENSMUSG00000003062	Stard3nl	chr13	-	19370249	19370533	0.769065	1
																											ENSMUSG00000006342	Susd2	chr10	-	75639833	75640657	1	1
																											ENSMUSG00000006342	Susd2	chr10	-	75640188	75640657	0.616534	1
																											ENSMUSG00000035900	Gramd4	chr15	+	86132814	86133759	1	1
																											ENSMUSG00000044433	Camsap3	chr8	+	3602185	3602627	1	1
																											ENSMUSG00000044433	Camsap3	chr8	+	3606503	3607890	0.778218	1
																											ENSMUSG00000044433	Camsap3	chr8	+	3608188	3608512	0.914103	1
																											ENSMUSG00000004642	Slbp	chr5	-	33645499	33646069	0.272122	1
																											ENSMUSG00000040048	Ndufb10	chr17	-	24722059	24722520	1	1
																											ENSMUSG00000042055	Wdr11	chr7	+	129628993	129629983	1	1
																											ENSMUSG00000042055	Wdr11	chr7	+	129630619	129631269	1	1
																											ENSMUSG00000042055	Wdr11	chr7	+	129632709	129633729	1	1
																											ENSMUSG00000028898	Trnau1ap	chr4	-	132325207	132326045	0.635071	1
																											ENSMUSG00000030409	Dmpk	chr7	+	19088000	19088264	1	1
																											ENSMUSG00000030409	Dmpk	chr7	+	19088000	19088264	1	1
																											ENSMUSG00000030409	Dmpk	chr7	+	19091938	19092254	0.353652	1
																											ENSMUSG00000040688	Tbl3	chr17	-	24702144	24702623	1	1
																											ENSMUSG00000040688	Tbl3	chr17	-	24704810	24705317	0.464217	1
																											ENSMUSG00000040688	Tbl3	chr17	-	24705146	24705481	0.892897	1
																											ENSMUSG00000031765	Mt1	chr8	+	94179822	94180327	1	1
																											ENSMUSG00000030802	Bckdk	chr7	+	127905221	127905480	1	1
																											ENSMUSG00000021149	Gtpbp4	chr13	-	8984765	8985319	1	1
																											ENSMUSG00000041747	Utp15	chr13	-	98257835	98259289	1	1
																											ENSMUSG00000025907	Rb1cc1	chr1	+	6239951	6240378	1	1
																											ENSMUSG00000025571	Tnrc6c	chr11	+	117749576	117753144	1	1
																											ENSMUSG00000034708	Grn	chr11	+	102434702	102435156	1	1
																											ENSMUSG00000005150	Wdr83	chr8	-	85076023	85076284	1	1
																											ENSMUSG00000005150	Wdr83	chr8	-	85079580	85080225	1	1
																											ENSMUSG00000005150	Wdr83	chr8	-	85079580	85080225	1	1
																											ENSMUSG00000005150	Wdr83	chr8	-	85079580	85080225	1	1
																											ENSMUSG00000005150	Wdr83	chr8	-	85079788	85080225	0.198001	1
																											ENSMUSG00000059070	Rpl18	chr7	+	45719528	45720018	1	1
																											ENSMUSG00000022564	Grina	chr15	+	76248448	76248900	1	1
																											ENSMUSG00000056938	Acbd4	chr11	+	103103525	103104172	0.218098	1
																											ENSMUSG00000056938	Acbd4	chr11	+	103111541	103112197	0.145271	1
																											ENSMUSG00000041263	Rusc1	chr3	-	89089176	89089561	1	1
																											ENSMUSG00000041263	Rusc1	chr3	-	89089668	89089975	0.692113	1
																											ENSMUSG00000039660	Spout1	chr2	-	30175186	30175812	1	1
																											ENSMUSG00000039660	Spout1	chr2	-	30177322	30177965	0.414541	1
																											ENSMUSG00000039660	Spout1	chr2	-	30177592	30177965	0.930763	1
																											ENSMUSG00000018659	Pnpo	chr11	-	96940015	96940955	1	1
																											ENSMUSG00000062906	Hdac10	chr15	-	89124174	89124588	0.431752	1
																											ENSMUSG00000062906	Hdac10	chr15	-	89124174	89124588	1	1
																											ENSMUSG00000062906	Hdac10	chr15	-	89126377	89126995	0.37954	1
																											ENSMUSG00000062906	Hdac10	chr15	-	89127593	89128018	1	1
																											ENSMUSG00000028959	Fastk	chr5	-	24441923	24442395	0.265263	1
																											ENSMUSG00000028959	Fastk	chr5	-	24443894	24444395	1	1
																											ENSMUSG00000040370	Etfrf1	chr6	+	145214521	145215271	1	1
																											ENSMUSG00000053332	Gas5	chr1	+	161035751	161036014	0.258122	1
																											ENSMUSG00000053332	Gas5	chr1	+	161035982	161037315	0.160138	1
																											ENSMUSG00000053332	Gas5	chr1	+	161035982	161037315	0.164926	1
																											ENSMUSG00000053332	Gas5	chr1	+	161036819	161037315	0.59705	1
																											ENSMUSG00000053332	Gas5	chr1	+	161036819	161037315	0.704619	1
																											ENSMUSG00000053332	Gas5	chr1	+	161037287	161037547	0.901513	1
																											ENSMUSG00000053332	Gas5	chr1	+	161037504	161038037	0.829828	1
																											ENSMUSG00000053332	Gas5	chr1	+	161038224	161038535	0.229558	1
																											ENSMUSG00000070808	Bicra	chr7	-	15977050	15978798	1	1
																											ENSMUSG00000080316	Spaca6	chr17	+	17838086	17838509	1	1
																											ENSMUSG00000036718	Micall2	chr5	-	139708885	139709589	1	1
																											ENSMUSG00000021302	Ggps1	chr13	-	14053909	14054455	0.79132	1
																											ENSMUSG00000035458	Tnni3	chr7	-	4521815	4522082	1	1
																											ENSMUSG00000002825	Qtrt1	chr9	+	21412232	21412531	1	1
																											ENSMUSG00000002825	Qtrt1	chr9	+	21419438	21419712	0.791821	1
																											ENSMUSG00000003184	Irf3	chr7	+	45000371	45001022	0.645683	1
																											ENSMUSG00000035798	Zdhhc17	chr10	-	110949620	110950683	0.816049	1
																											ENSMUSG00000041215	Yeats2	chr16	+	20171190	20174539	0.863902	1
																											ENSMUSG00000045031	Cetn4	chr3	-	37310292	37312446	1	1
																											ENSMUSG00000015452	Ager	chr17	+	34598379	34598794	1	1
																											ENSMUSG00000015452	Ager	chr17	+	34599995	34600860	1	1
																											ENSMUSG00000015452	Ager	chr17	+	34599995	34600621	1	1
																											ENSMUSG00000051811	Cox6b2	chr7	-	4752723	4753023	1	1
																											ENSMUSG00000002319	Ipo4	chr14	-	55628793	55629175	1	1
																											ENSMUSG00000019996	Map7	chr10	+	20273279	20273880	1	1
																											ENSMUSG00000028456	Unc13b	chr4	+	43257846	43258302	1	1
																											ENSMUSG00000013338	Fer1l4	chr2	-	156019530	156020583	1	1
																											ENSMUSG00000068114	Ccdc134	chr15	+	82131423	82134762	0.857686	1
																											ENSMUSG00000060992	Copz1	chr15	+	103290674	103291420	1	1
																											ENSMUSG00000036931	Nfkbid	chr7	+	30425708	30426021	1	1
																											ENSMUSG00000024426	Atat1	chr17	-	35908562	35908966	0.662097	1
																											ENSMUSG00000024426	Atat1	chr17	-	35909087	35909350	0.210117	1
																											ENSMUSG00000025369	Smarcc2	chr10	+	128474371	128474813	0.283911	1
																											ENSMUSG00000039536	Stau1	chr2	-	166950780	166951100	0.414708	1
																											ENSMUSG00000027680	Fxr1	chr3	+	34058023	34058231	0.559932	1
																											ENSMUSG00000022721	Trmt2a	chr16	+	18250819	18251660	0.569554	1
																											ENSMUSG00000022721	Trmt2a	chr16	+	18251358	18251660	1	1
																											ENSMUSG00000031634	Ufsp2	chr8	+	45980314	45980639	0.577216	1
																											ENSMUSG00000031634	Ufsp2	chr8	+	45980314	45980639	0.282842	1
																											ENSMUSG00000031842	Pde4c	chr8	+	70748367	70749033	1	1
																											ENSMUSG00000020329	Polrmt	chr10	-	79736366	79736614	1	1
																											ENSMUSG00000020329	Polrmt	chr10	-	79737263	79737713	1	1
																											ENSMUSG00000020329	Polrmt	chr10	-	79737263	79737886	1	1
																											ENSMUSG00000024446	Rpp21	chr17	-	36257441	36257706	1	1
																											ENSMUSG00000036202	Rif1	chr2	+	52093502	52094662	0.410482	1
																											ENSMUSG00000009585	Apobec3	chr15	+	79905443	79906602	1	1
																											ENSMUSG00000033728	Lrrc14	chr15	+	76712866	76713985	1	1
																											ENSMUSG00000033728	Lrrc14	chr15	+	76712866	76713985	1	1
																											ENSMUSG00000035545	Leng8	chr7	+	4144052	4144813	1	1
																											ENSMUSG00000039205	Ciz1	chr2	+	32363197	32363656	1	1
																											ENSMUSG00000039205	Ciz1	chr2	+	32370863	32371408	0.929107	1
																											ENSMUSG00000039205	Ciz1	chr2	+	32370863	32371408	0.294321	1
																											ENSMUSG00000039205	Ciz1	chr2	+	32374341	32375572	1	1
																											ENSMUSG00000039205	Ciz1	chr2	+	32376265	32377362	1	1
																											ENSMUSG00000031652	N4bp1	chr8	-	86846814	86848554	0.634168	1
																											ENSMUSG00000057335	Cep170	chr1	-	176733661	176736895	1	1
																											ENSMUSG00000057335	Cep170	chr1	-	176769232	176769870	1	1
																											ENSMUSG00000000605	Clcn4	chr7	-	7290398	7291956	1	1
																											ENSMUSG00000000605	Clcn4	chr7	-	7291410	7291956	0.23818	1
																											ENSMUSG00000038141	Tmem181a	chr17	+	6288985	6290678	1	1
																											ENSMUSG00000022621	Rabl2	chr15	-	89583909	89584390	0.609369	1
																											ENSMUSG00000022621	Rabl2	chr15	-	89583909	89584390	1	1
																											ENSMUSG00000003435	Supt5	chr7	-	28329258	28329484	0.211116	1
																											ENSMUSG00000063531	Sema3e	chr5	+	14225552	14226530	1	1
																											ENSMUSG00000035713	Usp35	chr7	-	97311352	97312625	1	1
																											ENSMUSG00000032180	Tmed1	chr9	-	21508930	21509351	1	1
																											ENSMUSG00000002010	Idh3g	chrX	-	73780573	73781030	1	1
																											ENSMUSG00000002010	Idh3g	chrX	-	73782005	73782716	0.787869	1
																											ENSMUSG00000062867	Impdh2	chr9	+	108561596	108561857	1	1
																											ENSMUSG00000009640	Dmap1	chr4	-	117675731	117676517	1	1
																											ENSMUSG00000009640	Dmap1	chr4	-	117675949	117676517	1	1
																											ENSMUSG00000048930	Tada3	chr6	-	113376891	113377739	0.744432	1
																											ENSMUSG00000021820	Camk2g	chr14	-	20764860	20765479	1	1
																											ENSMUSG00000030138	Bms1	chr6	-	118413078	118413919	1	1
																											ENSMUSG00000073468	Sft2d1	chr17	+	8321799	8323335	1	1
																											ENSMUSG00000073468	Sft2d1	chr17	+	8321799	8323335	0.591502	1
																											ENSMUSG00000042606	Hirip3	chr7	+	126862599	126862926	1	1
																											ENSMUSG00000020235	Fzr1	chr10	-	81368522	81370036	1	1
																											ENSMUSG00000027953	Slc50a1	chr3	-	89269826	89270139	0.47194	1
																											ENSMUSG00000020048	Hsp90b1	chr10	-	86691628	86692295	1	1
																											ENSMUSG00000029625	Cpsf4	chr5	+	145177229	145178928	0.624315	1
																											ENSMUSG00000029625	Cpsf4	chr5	+	145177229	145178928	1	1
																											ENSMUSG00000029625	Cpsf4	chr5	+	145177229	145178928	1	1
																											ENSMUSG00000033790	Tubgcp5	chr7	+	55825579	55826321	1	1
																											ENSMUSG00000032590	Apeh	chr9	-	108088260	108089569	1	1
																											ENSMUSG00000032590	Apeh	chr9	-	108091242	108091889	1	1
																											ENSMUSG00000032590	Apeh	chr9	-	108092275	108092717	1	1
																											ENSMUSG00000032590	Apeh	chr9	-	108092806	108093074	1	1
																											ENSMUSG00000052566	Hook2	chr8	+	84995735	84995937	0.278159	1
																											ENSMUSG00000014418	Hps5	chr7	-	46774813	46775951	1	1
																											ENSMUSG00000005262	Ufd1	chr16	+	18826254	18827106	0.570942	1
																											ENSMUSG00000059412	Fxyd2	chr9	+	45408299	45409549	1	1
																											ENSMUSG00000028689	Ccdc163	chr4	+	116709239	116709619	0.925677	1
																											ENSMUSG00000030822	Prr14	chr7	+	127473594	127473986	1	1
																											ENSMUSG00000015165	Hnrnpl	chr7	+	28818460	28818924	0.879583	1
																											ENSMUSG00000030330	Ing4	chr6	+	125047481	125048237	0.225098	1
																											ENSMUSG00000030330	Ing4	chr6	+	125047481	125048237	1	1
																											ENSMUSG00000030330	Ing4	chr6	+	125047792	125048237	0.884143	1
																											ENSMUSG00000039231	Suv39h1	chrX	-	8063695	8064057	1	1
																											ENSMUSG00000000223	Drp2	chrX	+	134440334	134441386	1	1
																											ENSMUSG00000035773	Kiss1r	chr10	+	79916970	79919551	1	1
																											ENSMUSG00000035773	Kiss1r	chr10	+	79920694	79921247	1	1
																											ENSMUSG00000086968	4933431E20Rik	chr3	-	107894050	107894992	1	1
																											ENSMUSG00000086968	4933431E20Rik	chr3	-	107894050	107894992	1	1
																											ENSMUSG00000006522	Itih3	chr14	-	30917661	30918443	1	1
																											ENSMUSG00000057649	Brd9	chr13	+	73941943	73942806	0.60951	1
																											ENSMUSG00000057649	Brd9	chr13	+	73941943	73942806	0.539974	1
																											ENSMUSG00000057649	Brd9	chr13	+	73941943	73942806	0.274885	1
																											ENSMUSG00000029510	Gpc2	chr5	-	138276583	138277487	1	1
																											ENSMUSG00000043929	Klhl15	chrX	+	94234989	94235420	1	1
																											ENSMUSG00000004952	Rasa4	chr5	+	136101243	136101689	0.168295	1
																											ENSMUSG00000004952	Rasa4	chr5	+	136104515	136105739	1	1
																											ENSMUSG00000038056	Kmt2c	chr5	-	25275899	25276256	1	1
																											ENSMUSG00000033364	Usp37	chr1	-	74468266	74470727	1	1
																											ENSMUSG00000053964	Lgals4	chr7	+	28840580	28840952	1	1
																											ENSMUSG00000032280	Tle3	chr9	+	61411262	61412514	1	1
																											ENSMUSG00000021012	Zc3h14	chr12	+	98785317	98785741	1	1
																											ENSMUSG00000003031	Cdkn1b	chr6	+	134921955	134925513	0.588737	1
																											ENSMUSG00000015094	Npdc1	chr2	+	25408606	25409001	1	1
																											ENSMUSG00000029545	Acads	chr5	-	115111856	115112391	1	1
																											ENSMUSG00000022718	Dgcr8	chr16	-	18277165	18278140	1	1
																											ENSMUSG00000006299	Aamp	chr1	-	74281328	74281642	1	1
																											ENSMUSG00000054405	Dnajc8	chr4	+	132544055	132544751	1	1
																											ENSMUSG00000006576	Slc4a3	chr1	+	75550754	75551382	0.425787	1
																											ENSMUSG00000022559	Fbxl6	chr15	-	76537916	76538735	0.864439	1
																											ENSMUSG00000028849	Map7d1	chr4	-	126233892	126234236	0.649756	1
																											ENSMUSG00000032579	Hemk1	chr9	-	107336571	107337378	1	1
																											ENSMUSG00000059796	Eif4a1	chr11	-	69667694	69668111	1	1
																											ENSMUSG00000059796	Eif4a1	chr11	-	69668195	69668548	1	1
																											ENSMUSG00000059796	Eif4a1	chr11	-	69668195	69668753	1	1
																											ENSMUSG00000059796	Eif4a1	chr11	-	69668195	69668753	1	1
																											ENSMUSG00000059796	Eif4a1	chr11	-	69669077	69670747	1	1
																											ENSMUSG00000056211	R3hdm1	chr1	+	128181985	128184654	0.923081	1
																											ENSMUSG00000025280	Polr3a	chr14	-	24452192	24452675	1	1
																											ENSMUSG00000027374	Mrps5	chr2	+	127596899	127598276	1	1
																											ENSMUSG00000020263	Appl2	chr10	-	83610977	83611199	0.224744	1
																											ENSMUSG00000030854	Ptpn5	chr7	-	47090726	47091570	1	1
																											ENSMUSG00000034729	Mrps10	chr17	+	47372426	47372645	0.234988	1
																											ENSMUSG00000034729	Mrps10	chr17	+	47372426	47372645	0.930371	1
																											ENSMUSG00000034729	Mrps10	chr17	+	47372575	47375109	1	1
																											ENSMUSG00000034789	Rab24	chr13	-	55320502	55320844	0.431698	1
																											ENSMUSG00000034789	Rab24	chr13	-	55321101	55321458	0.958861	1
																											ENSMUSG00000074247	Dda1	chr8	+	71472036	71472246	0.734783	1
																											ENSMUSG00000024695	Zfp91	chr19	-	12775994	12776462	1	1
																											ENSMUSG00000099083	Atf7	chr15	-	102547153	102547872	1	1
																											ENSMUSG00000027669	Gnb4	chr3	-	32589708	32590063	1	1
																											ENSMUSG00000029029	Wrap73	chr4	+	154152792	154154640	1	1
																											ENSMUSG00000029029	Wrap73	chr4	+	154155240	154156292	1	1
																											ENSMUSG00000027381	Bcl2l11	chr2	+	128128619	128129014	0.423923	1
																											ENSMUSG00000034796	Cpne7	chr8	+	123126632	123127439	1	1
																											ENSMUSG00000028064	Sema4a	chr3	-	88451344	88451786	1	1
																											ENSMUSG00000028064	Sema4a	chr3	-	88451344	88451786	0.233033	1
																											ENSMUSG00000028064	Sema4a	chr3	-	88451344	88451786	1	1
																											ENSMUSG00000001632	Brpf1	chr6	+	113321728	113322086	0.349968	1
																											ENSMUSG00000029201	Ugdh	chr5	-	65420248	65422782	1	1
																											ENSMUSG00000013997	Nit1	chr1	-	171344063	171344539	1	1
																											ENSMUSG00000028626	Col9a2	chr4	+	121043695	121043897	0.236927	1
																											ENSMUSG00000038530	Rgs4	chr1	-	169744350	169744736	1	1
																											ENSMUSG00000027318	Adam33	chr2	-	131053041	131053588	1	1
																											ENSMUSG00000027318	Adam33	chr2	-	131053041	131053588	1	1
																											ENSMUSG00000027318	Adam33	chr2	-	131053222	131053588	1	1
																											ENSMUSG00000027318	Adam33	chr2	-	131053684	131054361	1	1
																											ENSMUSG00000027318	Adam33	chr2	-	131053684	131054361	1	1
																											ENSMUSG00000027318	Adam33	chr2	-	131053917	131054361	1	1
																											ENSMUSG00000027318	Adam33	chr2	-	131056464	131056792	1	1
																											ENSMUSG00000026177	Slc11a1	chr1	+	74383624	74384173	1	1
																											ENSMUSG00000014601	Strip1	chr3	-	107615760	107616608	1	1
																											ENSMUSG00000033819	Ppp1r16a	chr15	+	76692836	76693138	1	1
																											ENSMUSG00000078619	Smarcd2	chr11	-	106264939	106265344	1	1
																											ENSMUSG00000078619	Smarcd2	chr11	-	106266890	106267180	1	1
																											ENSMUSG00000001016	Ilf2	chr3	+	90486850	90487097	0.222729	1
																											ENSMUSG00000097709	2810429I04Rik	chr13	+	3478242	3480001	1	1
																											ENSMUSG00000029713	Gnb2	chr5	-	137529003	137529509	1	1
																											ENSMUSG00000029713	Gnb2	chr5	-	137529845	137530290	1	1
																											ENSMUSG00000021488	Nsd1	chr13	+	55213203	55214150	0.20195	1
																											ENSMUSG00000033032	Afap1l1	chr18	-	61743277	61743760	1	1
																											ENSMUSG00000052593	Adam17	chr12	-	21329053	21330163	0.568083	1
																											ENSMUSG00000031838	Ifi30	chr8	-	70764718	70764794	0.660192	1
																											ENSMUSG00000022255	Mtdh	chr15	+	34114023	34118110	1	1
																											ENSMUSG00000027968	Larp7	chr3	-	127546046	127546569	1	1
																											ENSMUSG00000027968	Larp7	chr3	-	127546920	127547190	0.698994	1
																											ENSMUSG00000000731	Aire	chr10	-	78034585	78035833	1	1
																											ENSMUSG00000020372	Rack1	chr11	+	48801662	48802420	1	1
																											ENSMUSG00000050357	Carmil2	chr8	+	105695651	105696897	0.133126	1
																											ENSMUSG00000005899	Smpd4	chr16	+	17625719	17626538	1	1
																											ENSMUSG00000005899	Smpd4	chr16	+	17639744	17640289	1	1
																											ENSMUSG00000005899	Smpd4	chr16	+	17639744	17640289	1	1
																											ENSMUSG00000031066	Usp11	chrX	+	20712325	20712982	1	1
																											ENSMUSG00000031066	Usp11	chrX	+	20716746	20717804	1	1
																											ENSMUSG00000000901	Mmp11	chr10	-	75923221	75924115	1	1
																											ENSMUSG00000027087	Itgav	chr2	+	83803239	83806916	0.176203	1
																											ENSMUSG00000106864	Gtf3c2	chr5	-	31159433	31159861	0.256041	1
																											ENSMUSG00000106864	Gtf3c2	chr5	-	31167988	31168478	1	1
																											ENSMUSG00000005687	Bcas2	chr3	+	103174339	103177419	0.248037	1
																											ENSMUSG00000005687	Bcas2	chr3	+	103175618	103177419	0.732999	1
																											ENSMUSG00000011114	Tbrg1	chr9	-	37652614	37653169	0.890052	1
																											ENSMUSG00000011114	Tbrg1	chr9	-	37654215	37655092	1	1
																											ENSMUSG00000026127	Imp4	chr1	+	34443768	34444091	1	1
																											ENSMUSG00000000085	Scmh1	chr4	+	120529133	120530184	0.370588	1
																											ENSMUSG00000025262	Fam120c	chrX	+	151467299	151467856	1	1
																											ENSMUSG00000029471	Camkk2	chr5	-	122763773	122764302	1	1
																											ENSMUSG00000008855	Hdac5	chr11	-	102195748	102196117	1	1
																											ENSMUSG00000008855	Hdac5	chr11	-	102195748	102196322	1	1
																											ENSMUSG00000002109	Ddb2	chr2	-	91234107	91234951	0.86576	1
																											ENSMUSG00000021532	Fastkd3	chr13	+	68585177	68587834	1	1
																											ENSMUSG00000021532	Fastkd3	chr13	+	68585177	68587834	0.841256	1
																											ENSMUSG00000021557	Agtpbp1	chr13	-	59473687	59474712	1	1
																											ENSMUSG00000025736	Jmjd8	chr17	+	25829605	25829853	0.830593	1
																											ENSMUSG00000025736	Jmjd8	chr17	+	25829941	25830206	1	1
																											ENSMUSG00000059772	Slx1b	chr7	-	126691738	126692055	1	1
																											ENSMUSG00000059772	Slx1b	chr7	-	126691927	126692659	1	1
																											ENSMUSG00000041638	Gcn1l1	chr5	+	115574578	115575296	1	1
																											ENSMUSG00000041638	Gcn1l1	chr5	+	115579786	115580579	1	1
																											ENSMUSG00000027247	Arhgap1	chr2	+	91651497	91651823	0.238051	1
																											ENSMUSG00000027247	Arhgap1	chr2	+	91669384	91669729	1	1
																											ENSMUSG00000045411	2410002F23Rik	chr7	+	44247250	44248295	0.922735	1
																											ENSMUSG00000044573	Acp1	chr12	-	30904869	30905142	1	1
																											ENSMUSG00000010277	2610507B11Rik	chr11	+	78272777	78273299	1	1
																											ENSMUSG00000068245	Phf11d	chr14	-	59352650	59353381	1	1
																											ENSMUSG00000068245	Phf11d	chr14	-	59355139	59356450	1	1
																											ENSMUSG00000002997	Prkar2b	chr12	-	31958475	31960522	0.129724	1
																											ENSMUSG00000055762	Eef1d	chr15	-	75896242	75896740	1	1
																											ENSMUSG00000073125	Xlr3b	chrX	+	73197352	73198385	1	1
																											ENSMUSG00000022561	Gpaa1	chr15	+	76332159	76332631	1	1
																											ENSMUSG00000022561	Gpaa1	chr15	+	76332159	76332631	1	1
																											ENSMUSG00000022561	Gpaa1	chr15	+	76332902	76333373	0.992139	1
																											ENSMUSG00000040472	Rabggta	chr14	-	55718445	55718751	0.637307	1
																											ENSMUSG00000040472	Rabggta	chr14	-	55719090	55719531	1	1
																											ENSMUSG00000040472	Rabggta	chr14	-	55721843	55722176	1	1
																											ENSMUSG00000043243	Fam129c	chr8	+	71602098	71602488	1	1
																											ENSMUSG00000043243	Fam129c	chr8	+	71604927	71605718	1	1
																											ENSMUSG00000019897	Ccdc59	chr10	+	105842541	105845449	0.768882	1
																											ENSMUSG00000035278	Plekhj1	chr10	-	80796590	80796822	0.178177	1
																											ENSMUSG00000035278	Plekhj1	chr10	-	80797772	80797977	0.95154	1
																											ENSMUSG00000022503	Nubp1	chr16	+	10419652	10421128	0.314935	1
																											ENSMUSG00000012017	Scarf2	chr16	+	17804305	17804924	0.575683	1
																											ENSMUSG00000012017	Scarf2	chr16	+	17804305	17804924	1	1
																											ENSMUSG00000012017	Scarf2	chr16	+	17804485	17804924	1	1
																											ENSMUSG00000036820	Amdhd2	chr17	-	24157739	24158062	1	1
																											ENSMUSG00000040441	Slc26a10	chr10	-	127174283	127174901	1	1
																											ENSMUSG00000040272	Accs	chr2	-	93839147	93841386	1	1
																											ENSMUSG00000035623	Rsf1	chr7	+	97669768	97670882	1	1
																											ENSMUSG00000017686	Rhot1	chr11	+	80242020	80242681	1	1
																											ENSMUSG00000021918	Nek4	chr14	+	30975760	30977579	1	1
																											ENSMUSG00000021918	Nek4	chr14	+	30979989	30982516	1	1
																											ENSMUSG00000029290	Zfp326	chr5	+	105886316	105888839	1	1
																											ENSMUSG00000038482	Tfdp1	chr8	+	13370480	13371022	1	1
																											ENSMUSG00000037326	Capn15	chr17	-	25959806	25960563	0.585488	1
																											ENSMUSG00000037326	Capn15	chr17	-	25959806	25960563	0.888696	1
																											ENSMUSG00000037326	Capn15	chr17	-	25962670	25963145	1	1
																											ENSMUSG00000044906	4930503L19Rik	chr18	-	70467334	70468517	1	1
																											ENSMUSG00000085385	Snhg17	chr2	-	158357197	158360599	0.72667	1
																											ENSMUSG00000085385	Snhg17	chr2	-	158359181	158360599	1	1
																											ENSMUSG00000085385	Snhg17	chr2	-	158357197	158360599	1	1
																											ENSMUSG00000085385	Snhg17	chr2	-	158359181	158360599	0.522476	1
																											ENSMUSG00000085385	Snhg17	chr2	-	158359181	158360599	1	1
																											ENSMUSG00000085385	Snhg17	chr2	-	158359181	158360599	0.606394	1
																											ENSMUSG00000033055	Ankrd54	chr15	-	79054495	79055416	1	1
																											ENSMUSG00000033055	Ankrd54	chr15	-	79055291	79055542	0.425833	1
																											ENSMUSG00000022106	Rcbtb2	chr14	+	73154314	73154894	1	1
																											ENSMUSG00000022106	Rcbtb2	chr14	+	73154314	73154894	1	1
																											ENSMUSG00000022106	Rcbtb2	chr14	+	73176994	73178563	1	1
																											ENSMUSG00000036764	Dnajc12	chr10	+	63395784	63397378	1	1
																											ENSMUSG00000043085	Tmem82	chr4	-	141614944	141616621	1	1
																											ENSMUSG00000043085	Tmem82	chr4	-	141614944	141616621	1	1
																											ENSMUSG00000007029	Vars	chr17	+	35004771	35005061	0.768657	1
																											ENSMUSG00000007029	Vars	chr17	+	35011599	35011898	1	1
																											ENSMUSG00000007029	Vars	chr17	+	35013121	35013390	1	1
																											ENSMUSG00000007029	Vars	chr17	+	35013642	35013896	0.137143	1
																											ENSMUSG00000036112	Metap2	chr10	-	93879539	93880138	0.439523	1
																											ENSMUSG00000036112	Metap2	chr10	-	93879539	93880138	1	1
																											ENSMUSG00000036112	Metap2	chr10	-	93879539	93880138	0.585639	1
																											ENSMUSG00000008373	Prpf31	chr7	+	3634692	3636358	1	1
																											ENSMUSG00000028423	Nfx1	chr4	+	41015202	41016150	0.910301	1
																											ENSMUSG00000027365	Trpm7	chr2	-	126799168	126799363	0.627866	1
																											ENSMUSG00000007564	Ppp2r1a	chr17	+	20958939	20959523	0.813608	1
																											ENSMUSG00000006005	Tpr	chr1	+	150440066	150440529	0.598328	1
																											ENSMUSG00000006005	Tpr	chr1	+	150445867	150446241	1	1
																											ENSMUSG00000006005	Tpr	chr1	+	150447511	150449238	1	1
																											ENSMUSG00000034684	Sema3f	chr9	-	107684221	107684591	1	1
																											ENSMUSG00000010358	Ifi35	chr11	+	101457189	101457522	0.395771	1
																											ENSMUSG00000035941	Ibtk	chr9	-	85715298	85717652	1	1
																											ENSMUSG00000064068	Mtx1	chr3	-	89210106	89210448	0.950131	1
																											ENSMUSG00000064068	Mtx1	chr3	-	89212682	89212946	0.57586	1
																											ENSMUSG00000031708	Tecr	chr8	-	83572840	83573323	1	1
																											ENSMUSG00000031708	Tecr	chr8	-	83572840	83573323	0.741284	1
																											ENSMUSG00000031708	Tecr	chr8	-	83573027	83573323	1	1
																											ENSMUSG00000036002	Fam214b	chr4	-	43035835	43037206	1	1
																											ENSMUSG00000005268	Prlr	chr15	+	10325866	10326545	0.651955	1
																											ENSMUSG00000002550	Uck1	chr2	-	32258276	32258667	0.32462	1
																											ENSMUSG00000005103	Wdr1	chr5	-	38545673	38547091	1	1
																											ENSMUSG00000029166	Mapre3	chr5	+	30862497	30863405	1	1
																											ENSMUSG00000035245	Eogt	chr6	-	97147876	97148258	0.707698	1
																											ENSMUSG00000021948	Prkcd	chr14	-	30605439	30605901	1	1
																											ENSMUSG00000021948	Prkcd	chr14	-	30607287	30607668	0.379717	1
																											ENSMUSG00000006215	Zbtb17	chr4	+	141465523	141465842	1	1
																											ENSMUSG00000025504	Eps8l2	chr7	+	141357241	141357691	1	1
																											ENSMUSG00000068264	Ap5s1	chr2	+	131212446	131213514	1	1
																											ENSMUSG00000047767	Atg16l2	chr7	-	101291486	101291999	1	1
																											ENSMUSG00000047767	Atg16l2	chr7	-	101291486	101291999	0.618374	1
																											ENSMUSG00000047767	Atg16l2	chr7	-	101292107	101292424	0.442653	1
																											ENSMUSG00000047767	Atg16l2	chr7	-	101296507	101297008	0.742483	1
																											ENSMUSG00000002984	Tomm40	chr7	-	19703065	19703391	1	1
																											ENSMUSG00000079677	Fdx1l	chr9	-	21073074	21073318	0.544413	1
																											ENSMUSG00000028684	Urod	chr4	-	116991231	116991493	0.337243	1
																											ENSMUSG00000028684	Urod	chr4	-	116992563	116993023	1	1
																											ENSMUSG00000054708	Ankrd24	chr10	+	81635687	81636426	1	1
																											ENSMUSG00000054708	Ankrd24	chr10	+	81639306	81639936	1	1
																											ENSMUSG00000054708	Ankrd24	chr10	+	81640027	81640812	1	1
																											ENSMUSG00000033106	Slc7a6os	chr8	-	106202230	106204540	1	1
																											ENSMUSG00000039768	Dnajc11	chr4	+	151979271	151979586	0.920795	1
																											ENSMUSG00000038695	Josd2	chr7	+	44470858	44471307	1	1
																											ENSMUSG00000026469	Xpr1	chr1	-	155330337	155332386	0.909899	1
																											ENSMUSG00000003808	Farsa	chr8	+	84867548	84867918	1	1
																											ENSMUSG00000003808	Farsa	chr8	+	84867548	84867918	1	1
																											ENSMUSG00000003808	Farsa	chr8	+	84868008	84868338	1	1
																											ENSMUSG00000032322	Pstpip1	chr9	+	56127484	56127860	1	1
																											ENSMUSG00000037242	Clic4	chr4	-	135223463	135226149	1	1
																											ENSMUSG00000056492	Adgrf5	chr17	+	43439675	43440160	1	1
																											ENSMUSG00000024013	Fgd2	chr17	+	29373217	29373414	1	1
																											ENSMUSG00000026209	Dnpep	chr1	-	75315618	75316070	1	1
																											ENSMUSG00000026209	Dnpep	chr1	-	75316540	75316803	0.84012	1
																											ENSMUSG00000016833	Mrps18c	chr5	+	100803969	100804471	1	1
																											ENSMUSG00000020231	Dip2a	chr10	-	76279705	76279966	1	1
																											ENSMUSG00000032030	Cul5	chr9	-	53642517	53642826	1	1
																											ENSMUSG00000001240	Ramp2	chr11	+	101247585	101248250	1	1
																											ENSMUSG00000031756	Cenpn	chr8	+	116936193	116937274	1	1
																											ENSMUSG00000055923	Aasdh	chr5	-	76888029	76888834	1	1
																											ENSMUSG00000020464	Pnpt1	chr11	+	29153231	29154215	1	1
																											ENSMUSG00000021115	Vrk1	chr12	+	106070524	106071641	1	1
																											ENSMUSG00000020897	Aurkb	chr11	+	69048173	69048644	1	1
																											ENSMUSG00000015536	Mocs2	chr13	+	114825210	114826281	1	1
																											ENSMUSG00000015536	Mocs2	chr13	+	114825210	114826281	0.511623	1
																											ENSMUSG00000040543	Pitpnm3	chr11	-	72074418	72075035	1	1
																											ENSMUSG00000022568	Scrib	chr15	-	76047921	76048152	1	1
																											ENSMUSG00000022568	Scrib	chr15	-	76048709	76049093	1	1
																											ENSMUSG00000039988	Ankrd13c	chr3	+	157972999	157975294	1	1
																											ENSMUSG00000018076	Med13l	chr5	+	118749608	118751034	1	1
																											ENSMUSG00000018076	Med13l	chr5	+	118759101	118763916	0.909601	1
																											ENSMUSG00000030677	Kif22	chr7	-	127032881	127033392	1	1
																											ENSMUSG00000001833	2018-09-07	chr9	+	25303716	25306265	1	1
																											ENSMUSG00000069835	Sat2	chr11	+	69622051	69622332	1	1
																											ENSMUSG00000031917	Nip7	chr8	+	107057092	107057411	0.896885	1
																											ENSMUSG00000049339	Retreg2	chr1	+	75146429	75147909	0.621419	1
																											ENSMUSG00000018565	Elp5	chr11	-	69979829	69980059	0.760012	1
																											ENSMUSG00000058586	Serhl	chr15	+	83101643	83101985	1	1
																											ENSMUSG00000026288	Inpp5d	chr1	+	87715037	87715313	1	1
																											ENSMUSG00000028969	Cdk5	chr5	-	24422331	24422558	0.895032	1
																											ENSMUSG00000039294	BC017643	chr11	-	121225803	121227284	1	1
																											ENSMUSG00000016940	Kctd2	chr11	+	115429279	115431274	0.71949	1
																											ENSMUSG00000070436	Serpinh1	chr7	-	99352881	99353114	0.192107	1
																											ENSMUSG00000025578	Cbx8	chr11	-	119039931	119040159	0.3675	1
																											ENSMUSG00000059540	Tcea2	chr2	+	181685791	181686752	0.738258	1
																											ENSMUSG00000037339	Fam53a	chr5	-	33600355	33608227	1	1
																											ENSMUSG00000000915	Hip1r	chr5	+	124000711	124001311	0.431841	1
																											ENSMUSG00000074923	Pak6	chr2	+	118693866	118694640	1	1
																											ENSMUSG00000036591	Arhgap21	chr2	-	20855353	20855706	1	1
																											ENSMUSG00000038990	Cables2	chr2	-	180261076	180263155	0.253916	1
																											ENSMUSG00000040687	Madd	chr2	-	91157984	91158488	1	1
																											ENSMUSG00000040687	Madd	chr2	-	91157984	91158488	1	1
																											ENSMUSG00000040687	Madd	chr2	-	91157984	91158488	0.439719	1
																											ENSMUSG00000000561	Wdr77	chr3	+	105965764	105966425	0.197688	1
																											ENSMUSG00000027333	Smox	chr2	+	131520094	131521171	1	1
																											ENSMUSG00000027333	Smox	chr2	+	131520411	131521171	1	1
																											ENSMUSG00000027333	Smox	chr2	+	131520094	131521171	0.6229	1
																											ENSMUSG00000027333	Smox	chr2	+	131520411	131521171	0.51627	1
																											ENSMUSG00000036270	Edc4	chr8	+	105887781	105888045	0.959488	1
																											ENSMUSG00000097075	Cdiptos	chr7	-	126974452	126975084	1	1
																											ENSMUSG00000040463	Mybbp1a	chr11	+	72442569	72442853	0.980452	1
																											ENSMUSG00000040463	Mybbp1a	chr11	+	72445893	72446257	1	1
																											ENSMUSG00000040463	Mybbp1a	chr11	+	72447552	72447882	1	1
																											ENSMUSG00000028656	Cap1	chr4	-	122862622	122863085	0.914386	1
																											ENSMUSG00000023007	Prpf40b	chr15	+	99304424	99305433	0.240834	1
																											ENSMUSG00000023007	Prpf40b	chr15	+	99314842	99315286	1	1
																											ENSMUSG00000054099	Slc25a40	chr5	+	8440720	8442571	1	1
																											ENSMUSG00000014353	Tmem87b	chr2	+	128845460	128846799	1	1
																											ENSMUSG00000007880	Arid1a	chr4	-	133695571	133696156	1	1
																											ENSMUSG00000066232	Ipo7	chr7	+	110044617	110046251	1	1
																											ENSMUSG00000066232	Ipo7	chr7	+	110048944	110049693	1	1
																											ENSMUSG00000008167	Fbxw9	chr8	+	85064383	85064672	0.587902	1
																											ENSMUSG00000040928	S100pbp	chr4	-	129180188	129181840	1	1
																											ENSMUSG00000040928	S100pbp	chr4	-	129181741	129182532	0.206457	1
																											ENSMUSG00000040928	S100pbp	chr4	-	129181966	129182532	1	1
																											ENSMUSG00000040928	S100pbp	chr4	-	129181966	129182532	1	1
																											ENSMUSG00000002329	Mdp1	chr14	-	55659987	55660228	0.363653	1
																											ENSMUSG00000068206	Pick1	chr15	+	79245289	79246111	0.334724	1
																											ENSMUSG00000068206	Pick1	chr15	+	79245289	79246500	1	1
																											ENSMUSG00000068206	Pick1	chr15	+	79247264	79248296	0.588633	1
																											ENSMUSG00000061111	Mcrip1	chr11	-	120544680	120544928	1	1
																											ENSMUSG00000034974	Dapk3	chr10	+	81189938	81190511	0.888048	1
																											ENSMUSG00000076437	Selenoh	chr2	-	84670244	84670676	1	1
																											ENSMUSG00000029703	Lrwd1	chr5	-	136132305	136133079	1	1
																											ENSMUSG00000029703	Lrwd1	chr5	-	136132305	136134050	1	1
																											ENSMUSG00000029703	Lrwd1	chr5	-	136132305	136134050	1	1
																											ENSMUSG00000029703	Lrwd1	chr5	-	136133304	136134050	1	1
																											ENSMUSG00000037353	Letmd1	chr15	+	100475501	100476886	1	1
																											ENSMUSG00000047554	Tmem41b	chr7	-	109985961	109986259	0.482485	1
																											ENSMUSG00000033475	Tomm6	chr17	-	47686739	47687288	0.70387	1
																											ENSMUSG00000014850	Msh3	chr13	-	92342245	92345101	1	1
																											ENSMUSG00000031808	Slc27a1	chr8	+	71579403	71580068	1	1
																											ENSMUSG00000027193	Api5	chr2	-	94426932	94427577	1	1
																											ENSMUSG00000033237	Arid2	chr15	+	96391103	96392478	0.752014	1
																											ENSMUSG00000027944	Hax1	chr3	-	89997386	89998003	0.704902	1
																											ENSMUSG00000027944	Hax1	chr3	-	89997386	89998003	1	1
																											ENSMUSG00000003233	Dvl3	chr16	+	20522255	20523531	1	1
																											ENSMUSG00000020831	0610010K14Rik	chr11	-	70235205	70235800	1	1
																											ENSMUSG00000052488	Cherp	chr8	-	72469863	72470227	0.691427	1
																											ENSMUSG00000032301	Psma4	chr9	+	54952081	54952383	0.495774	1
																											ENSMUSG00000022463	Srebf2	chr15	+	82169737	82171283	0.777268	1
																											ENSMUSG00000030852	Tacc2	chr7	+	130728522	130729828	1	1
																											ENSMUSG00000074064	Mlycd	chr8	+	119401480	119402590	1	1
																											ENSMUSG00000031311	Nono	chrX	+	101444687	101445334	1	1
																											ENSMUSG00000040136	Abcc8	chr7	-	46105808	46106688	1	1
																											ENSMUSG00000040136	Abcc8	chr7	-	46107237	46108214	1	1
																											ENSMUSG00000038895	Zfp653	chr9	-	22055992	22056528	0.693853	1
																											ENSMUSG00000038895	Zfp653	chr9	-	22057500	22058415	1	1
																											ENSMUSG00000040860	Crocc	chr4	-	141017853	141018381	1	1
																											ENSMUSG00000040860	Crocc	chr4	-	141019707	141020489	1	1
																											ENSMUSG00000000134	Tfe3	chrX	+	7769429	7770830	0.348469	1
																											ENSMUSG00000000134	Tfe3	chrX	+	7770994	7772596	0.550437	1
[truncated: 876 more rows]
