# Supplementary material for: Progesterone receptor antagonists reverse stem cell expansion and the paracrine effectors of progesterone action in the mouse mammary gland
Source: Breast Cancer Res. 2021 Aug 3;23:78. doi: 10.1186/s13058-021-01455-2 (PMC8330021; doi:10.1186/s13058-021-01455-2)
Supplement: Supplementary file 14 — Additional file 14. Supplementary Table 8: Alternative splicing, EP + PR inhibitors, MSC [file 13058_2021_1455_MOESM14_ESM.xlsx]

## Sheet: MaSC_EPvsPR_inhibitor
Rentained Intron								A5' Splice Site								A3' Splice site								Mutually exclusive exon								Skipped exon
GeneID	geneSymbol	chr	strand	riExonStart_0base	riExonEnd	PValue	FDR	GeneID	geneSymbol	chr	strand	longExonStart_0base	longExonEnd	PValue	FDR	GeneID	geneSymbol	chr	strand	longExonStart_0base	longExonEnd	PValue	FDR	GeneID	geneSymbol	chr	strand	1stExonStart_0base	1stExonEnd	PValue	FDR	GeneID	geneSymbol	chr	strand	exonStart_0base	exonEnd	PValue	FDR
ENSMUSG00000006906	Stambp	chr6	-	83563822	83570519	1.66533e-15	5.15754e-12	ENSMUSG00000058056	Palld	chr8	-	61549570	61550245	0	0	ENSMUSG00000059939	9430015G10Rik	chr4	+	156121932	156122416	7.41293e-11	3.01632e-07	ENSMUSG00000032702	Kank1	chr19	+	25378410	25378530	1.06139e-08	0.000143097	ENSMUSG00000032366	Tpm1	chr9	-	67047785	67047911	0	0
ENSMUSG00000026878	Rab14	chr2	-	35180204	35183831	1.15374e-12	1.78657e-09	ENSMUSG00000058407	Txndc9	chr1	-	37993991	37995841	1.00381e-10	1.27182e-07	ENSMUSG00000001909	Trmt1	chr8	+	84689631	84689908	2.35626e-08	3.20412e-05	ENSMUSG00000031565	Fgfr1	chr8	+	25563373	25563524	1.6531e-07	0.00111436	ENSMUSG00000017677	Wsb1	chr11	-	79243399	79243575	1.11022e-16	2.24017e-12
ENSMUSG00000039187	Fanci	chr7	+	79448819	79449180	5.88025e-11	6.07038e-08	ENSMUSG00000057594	Arl16	chr11	-	120467009	120467240	4.57103e-09	3.86099e-06	ENSMUSG00000022098	Bmp1	chr14	-	70507998	70508214	2.36234e-08	3.20412e-05	ENSMUSG00000027763	Mbnl1	chr3	+	60614682	60614736	3.28421e-06	0.00921131	ENSMUSG00000027750	Postn	chr3	+	54385670	54385754	1.11022e-16	2.24017e-12
ENSMUSG00000003549	Ercc1	chr7	+	19355100	19355361	5.1796e-10	4.0103e-07	ENSMUSG00000032413	Rasa2	chr9	-	96566015	96568487	1.35173e-07	8.56318e-05	ENSMUSG00000026074	Map4k4	chr1	+	40000530	40000749	8.32201e-08	8.46557e-05	ENSMUSG00000040774	Cept1	chr3	-	106512802	106512887	3.41615e-06	0.00921131	ENSMUSG00000032366	Tpm1	chr9	-	67047785	67047911	2.22045e-16	3.36026e-12
ENSMUSG00000021134	Srsf5	chr12	+	80947795	80949168	3.38605e-09	2.09732e-06	ENSMUSG00000022338	Eny2	chr15	+	44428091	44428242	1.83898e-07	9.31997e-05	ENSMUSG00000031660	Brd7	chr8	-	88334104	88334219	2.60465e-07	0.000211966	ENSMUSG00000031105	Slc25a14	chrX	+	48623961	48624197	3.37304e-06	0.00921131	ENSMUSG00000020212	Mdm1	chr10	+	118156833	118156863	2.75446e-13	3.33472e-09
ENSMUSG00000025982	Sf3b1	chr1	-	55014482	55016490	1.66848e-08	8.61215e-06	ENSMUSG00000025747	Tyms	chr5	-	30069833	30071707	4.07895e-07	0.000172268	ENSMUSG00000058318	Phf21a	chr2	+	92215448	92215575	8.83594e-07	0.000599224	ENSMUSG00000035314	Gdpd5	chr7	+	99448472	99448566	5.71246e-06	0.0128359	ENSMUSG00000037608	Bclaf1	chr10	+	20327163	20327391	3.59601e-13	3.62796e-09
ENSMUSG00000024454	Hdac3	chr18	-	37943677	37944209	2.34494e-08	9.82328e-06	ENSMUSG00000003549	Ercc1	chr7	+	19355100	19355179	2.90036e-06	0.00104993	ENSMUSG00000001844	Zdhhc4	chr5	-	143326098	143326305	2.31377e-06	0.00134496	ENSMUSG00000021759	Plpp1	chr13	+	112851402	112851554	9.80548e-06	0.0165247	ENSMUSG00000032633	Flcn	chr11	-	59809364	59809485	2.88747e-12	2.49696e-08
ENSMUSG00000030815	Phkg2	chr7	+	127577534	127578029	2.53749e-08	9.82328e-06	ENSMUSG00000042790	Rnf214	chr9	-	45899745	45900256	3.43574e-06	0.00108827	ENSMUSG00000041459	Tardbp	chr4	-	148617565	148617737	4.60859e-06	0.0020836	ENSMUSG00000016921	Srsf6	chr2	+	162931993	162932142	9.53673e-06	0.0165247	ENSMUSG00000028464	Tpm2	chr4	-	43519002	43519078	5.28233e-12	3.99694e-08
ENSMUSG00000028809	Srrm1	chr4	-	135344498	135346857	3.08944e-08	1.06311e-05	ENSMUSG00000001909	Trmt1	chr8	+	84689256	84689376	5.19383e-06	0.00119647	ENSMUSG00000040187	Arntl2	chr6	+	146820527	146820668	4.52916e-06	0.0020836	ENSMUSG00000026942	Traf2	chr2	-	25537070	25537149	1.51453e-05	0.0212112	ENSMUSG00000017421	Zfp207	chr11	+	80393083	80393176	1.07699e-11	7.24374e-08
ENSMUSG00000027804	Ppid	chr3	+	79595201	79597873	4.31133e-08	1.33522e-05	ENSMUSG00000002968	Med25	chr7	-	44892064	44892144	5.19254e-06	0.00119647	ENSMUSG00000006498	Ptbp1	chr10	+	79859071	79859271	5.79959e-06	0.00214532	ENSMUSG00000041324	Inhba	chr13	+	16014450	16014532	1.59503e-05	0.0212112	ENSMUSG00000018830	Myh11	chr16	-	14198049	14198088	3.9888e-11	2.41454e-07
ENSMUSG00000010097	Nxf1	chr19	+	8764921	8766833	7.02943e-08	1.9791e-05	ENSMUSG00000072964	Bhlhb9	chrX	+	135885852	135886097	4.95144e-06	0.00119647	ENSMUSG00000030512	Snrpa1	chr7	+	66069423	66070665	5.59912e-06	0.00214532	ENSMUSG00000031816	Mthfsd	chr8	-	121105573	121105687	1.73063e-05	0.0212112	ENSMUSG00000025856	Pdgfa	chr5	-	138978621	138978690	2.79497e-09	1.53807e-05
ENSMUSG00000027667	Zfp639	chr3	+	32515283	32517139	1.1169e-07	2.48715e-05	ENSMUSG00000031878	Nae1	chr8	-	104527377	104530116	6.04564e-06	0.00127664	ENSMUSG00000041459	Tardbp	chr4	-	148617565	148617825	6.94729e-06	0.00235571	ENSMUSG00000026942	Traf2	chr2	-	25537070	25537149	2.26807e-05	0.023003	ENSMUSG00000032366	Tpm1	chr9	-	67048123	67048249	3.42056e-09	1.72547e-05
ENSMUSG00000010608	Rbm25	chr12	+	83660594	83664259	1.0479e-07	2.48715e-05	ENSMUSG00000024188	Luc7l	chr17	+	26252965	26254388	8.23727e-06	0.00160563	ENSMUSG00000038644	Pold1	chr7	-	44533884	44534487	8.40333e-06	0.00236369	ENSMUSG00000071172	Srsf3	chr17	+	29039453	29039909	2.57556e-05	0.023003	ENSMUSG00000027540	Ptpn1	chr2	+	167951955	167952079	6.47596e-09	2.925e-05
ENSMUSG00000058407	Txndc9	chr1	-	37993991	37995841	1.12432e-07	2.48715e-05	ENSMUSG00000024856	Cdk2ap2	chr19	+	4097400	4097733	1.08149e-05	0.00195749	ENSMUSG00000003309	Ap1m2	chr9	-	21305492	21305771	8.71354e-06	0.00236369	ENSMUSG00000061904	Slc25a3	chr10	-	91121921	91122043	2.50071e-05	0.023003	ENSMUSG00000024505	Dtwd2	chr18	-	49723621	49723814	6.7649e-09	2.925e-05
ENSMUSG00000001909	Trmt1	chr8	+	84690516	84690947	1.64699e-07	3.40049e-05	ENSMUSG00000026730	Pter	chr2	+	12978159	12978617	1.71523e-05	0.0028976	ENSMUSG00000028809	Srrm1	chr4	-	135340502	135340607	7.80846e-06	0.00236369	ENSMUSG00000063952	Brpf3	chr17	+	28828343	28828441	2.72992e-05	0.023003	ENSMUSG00000031169	Porcn	chrX	-	8199066	8199152	9.92912e-09	4.00693e-05
ENSMUSG00000015536	Mocs2	chr13	+	114825210	114826281	1.80189e-07	3.48779e-05	ENSMUSG00000074064	Mlycd	chr8	+	119401480	119402590	2.16338e-05	0.00342625	ENSMUSG00000068917	Clk2	chr3	+	89168694	89168923	9.99265e-06	0.00254126	ENSMUSG00000069601	Ank3	chr10	+	69904447	69904510	2.56691e-05	0.023003	ENSMUSG00000028745	Capzb	chr4	+	139288860	139288973	1.24887e-08	4.72485e-05
ENSMUSG00000025151	Maged1	chrX	-	94537675	94538065	3.04865e-07	5.55392e-05	ENSMUSG00000060073	Psma3	chr12	+	70978732	70978839	2.4674e-05	0.00367787	ENSMUSG00000041459	Tardbp	chr4	-	148612381	148617705	1.6153e-05	0.00359321	ENSMUSG00000032849	Abcc4	chr14	-	118632097	118632187	3.06637e-05	0.0243182	ENSMUSG00000027763	Mbnl1	chr3	+	60614682	60614736	1.63326e-08	5.49255e-05
ENSMUSG00000039768	Dnajc11	chr4	+	151977998	151979586	3.76208e-07	6.47287e-05	ENSMUSG00000031835	Mbtps1	chr8	-	119515577	119518279	3.19679e-05	0.00450037	ENSMUSG00000019948	Actr6	chr10	-	89725767	89725953	1.67783e-05	0.00359321	ENSMUSG00000025512	Chid1	chr7	-	141515401	141515503	3.47004e-05	0.0259906	ENSMUSG00000026034	Clk1	chr1	-	58417012	58417179	1.54635e-08	5.49255e-05
ENSMUSG00000035086	Becn1	chr11	-	101295533	101296316	5.41652e-07	8.82893e-05	ENSMUSG00000001065	Zfp276	chr8	+	123264815	123265070	4.57492e-05	0.00593159	ENSMUSG00000022299	Slc25a32	chr15	-	39098128	39098242	1.53896e-05	0.00359321	ENSMUSG00000033295	Ptprf	chr4	-	118234958	118235103	3.85128e-05	0.0268893	ENSMUSG00000110105	Gm45844	chr7	-	7239979	7240207	1.84435e-08	5.87599e-05
ENSMUSG00000002997	Prkar2b	chr12	-	31958475	31960522	7.39867e-07	0.000114568	ENSMUSG00000022704	Qtrt2	chr16	-	43870778	43871820	4.6816e-05	0.00593159	ENSMUSG00000040913	Fbxw4	chr19	-	45579120	45579262	1.99784e-05	0.00387105	ENSMUSG00000025026	Add3	chr19	+	53242503	53242627	3.98891e-05	0.0268893	ENSMUSG00000068284	Usf3	chr16	+	44198903	44199021	2.40404e-08	7.27618e-05
ENSMUSG00000005687	Bcas2	chr3	+	103174339	103177419	1.1791e-06	0.00017389	ENSMUSG00000075595	Zfp652	chr11	+	95748999	95750147	6.42954e-05	0.00775831	ENSMUSG00000030590	Fam98c	chr7	-	29153321	29154535	1.9504e-05	0.00387105	ENSMUSG00000015937	H2afy	chr13	-	56096123	56096234	4.66087e-05	0.0291515	ENSMUSG00000021614	Vcan	chr13	-	89688284	89693501	2.8005e-08	8.0725e-05
ENSMUSG00000042831	Alkbh6	chr7	+	30309480	30310054	1.51078e-06	0.000212676	ENSMUSG00000030890	Ilk	chr7	+	105741373	105741539	7.28127e-05	0.00838669	ENSMUSG00000003531	Dgcr6	chr16	+	18070081	18070231	2.14896e-05	0.00397459	ENSMUSG00000023206	Il15ra	chr2	+	11724095	11724128	4.75696e-05	0.0291515	ENSMUSG00000042625	Safb2	chr17	-	56578692	56578844	4.4001e-08	0.000121069
ENSMUSG00000040928	S100pbp	chr4	-	129181741	129182532	1.63562e-06	0.00022024	ENSMUSG00000027381	Bcl2l11	chr2	+	128128619	128129014	7.69248e-05	0.0084751	ENSMUSG00000014668	Chfr	chr5	+	110140353	110140453	2.54192e-05	0.00449699	ENSMUSG00000024206	Rfx2	chr17	-	56782250	56782348	5.1004e-05	0.0298972	ENSMUSG00000016921	Srsf6	chr2	+	162932814	162933082	4.68562e-08	0.00012332
ENSMUSG00000041459	Tardbp	chr4	-	148612381	148618791	2.11763e-06	0.000262332	ENSMUSG00000039983	Ccdc32	chr2	-	119029307	119029393	9.32871e-05	0.00984956	ENSMUSG00000034940	Synrg	chr11	+	83977079	83977201	3.3693e-05	0.00571236	ENSMUSG00000029238	Clock	chr5	-	76266799	76266889	5.62716e-05	0.0303461	ENSMUSG00000079017	Ifi27l2a	chr12	-	103443481	103443511	5.19557e-08	0.000131043
ENSMUSG00000041268	Dmxl2	chr9	-	54367553	54369262	2.10578e-06	0.000262332	ENSMUSG00000052423	B4galt3	chr1	+	171271202	171272756	0.000102413	0.0103806	ENSMUSG00000052428	Tmco1	chr1	+	167325875	167326020	3.65167e-05	0.0058125	ENSMUSG00000022899	Slc15a2	chr16	-	36759225	36759314	5.41999e-05	0.0303461	ENSMUSG00000013033	Adgrl1	chr8	+	83924205	83924355	6.0532e-08	0.000143343
ENSMUSG00000000561	Wdr77	chr3	+	105965764	105966425	5.39315e-06	0.000642407	ENSMUSG00000034211	Mrps17	chr5	+	129715683	129715941	0.000108353	0.0105603	ENSMUSG00000031816	Mthfsd	chr8	-	121104391	121104558	3.71406e-05	0.0058125	ENSMUSG00000039988	Ankrd13c	chr3	+	157975227	157975294	6.19607e-05	0.032129	ENSMUSG00000042625	Safb2	chr17	-	56578636	56578844	6.15683e-08	0.000143343
ENSMUSG00000074489	Bglap3	chr3	-	88370127	88371479	7.96081e-06	0.000907581	ENSMUSG00000002949	Timm44	chr8	-	4265225	4266680	0.000128176	0.0120295	ENSMUSG00000063511	Snrnp70	chr7	-	45380716	45383184	7.63403e-05	0.0115048	ENSMUSG00000040272	Accs	chr2	-	93840022	93840123	7.75004e-05	0.0386985	ENSMUSG00000001768	Rin2	chr2	+	145737382	145737454	6.72919e-08	0.000150866
ENSMUSG00000038975	Rabggtb	chr3	-	153910260	153910888	8.20545e-06	0.000907581	ENSMUSG00000028076	Cd1d1	chr3	-	86998632	86998905	0.000154413	0.0138296	ENSMUSG00000032507	Fbxl2	chr9	-	113983984	113984116	9.25302e-05	0.0134466	ENSMUSG00000032294	Pkm	chr9	+	59675028	59675195	8.55356e-05	0.0411854	ENSMUSG00000028173	Wls	chr3	+	159848564	159848645	7.73344e-08	0.000161424
ENSMUSG00000029201	Ugdh	chr5	-	65420248	65422782	1.21131e-05	0.00122277	ENSMUSG00000078652	Psme3	chr11	+	101319455	101319592	0.000158271	0.0138296	ENSMUSG00000042185	Nfrkb	chr9	+	31397719	31398644	9.798e-05	0.0137476	ENSMUSG00000031392	Irak1	chrX	-	74021848	74021963	0.000140726	0.0654228	ENSMUSG00000021996	Esd	chr14	+	74744647	74744746	7.52253e-08	0.000161424
ENSMUSG00000051306	Usp42	chr5	-	143714601	143716671	1.17053e-05	0.00122277	ENSMUSG00000070953	Rabepk	chr2	-	34797370	34797433	0.000203801	0.0172144	ENSMUSG00000026110	Mgat4a	chr1	-	37466536	37466583	0.000109131	0.0148018	ENSMUSG00000015937	H2afy	chr13	-	56084195	56084285	0.000147677	0.0663662	ENSMUSG00000022515	Anks3	chr16	-	4956549	4956619	1.59321e-07	0.00030138
ENSMUSG00000000441	Raf1	chr6	-	115620208	115621862	1.22396e-05	0.00122277	ENSMUSG00000035172	Plekhh3	chr11	-	101165050	101165187	0.000264042	0.0215833	ENSMUSG00000026049	Tex30	chr1	-	44099847	44100001	0.000119706	0.0151857	ENSMUSG00000023206	Il15ra	chr2	+	11724095	11724128	0.000158189	0.0687735	ENSMUSG00000037999	Arap2	chr5	-	62641327	62641396	1.55748e-07	0.00030138
ENSMUSG00000034211	Mrps17	chr5	+	129715683	129716866	1.29478e-05	0.00125311	ENSMUSG00000021483	Cdk20	chr13	+	64436765	64436846	0.00029556	0.0234047	ENSMUSG00000021694	Ercc8	chr13	+	108183724	108183922	0.000123158	0.0151857	ENSMUSG00000033423	Eri3	chr4	+	117552967	117553043	0.000163236	0.0687735	ENSMUSG00000020439	Smtn	chr11	-	3537554	3537605	1.49843e-07	0.00030138
ENSMUSG00000029326	Enoph1	chr5	+	100067798	100068760	2.01918e-05	0.00189497	ENSMUSG00000038671	Arfrp1	chr2	-	181364013	181364398	0.000352694	0.025535	ENSMUSG00000000374	Trappc10	chr10	-	78201431	78201590	0.000120334	0.0151857	ENSMUSG00000073684	Faap20	chr4	+	155250544	155250650	0.000186275	0.0738634	ENSMUSG00000049076	Acap2	chr16	-	31153691	31153759	1.64843e-07	0.000302378
ENSMUSG00000022556	Hsf1	chr15	+	76500130	76500336	2.34899e-05	0.00209872	ENSMUSG00000037816	Fbxw17	chr13	+	50432170	50432346	0.000338975	0.025535	ENSMUSG00000075702	Selenom	chr11	+	3516485	3516920	0.000151961	0.0181861	ENSMUSG00000059119	Nap1l4	chr7	-	143529417	143529557	0.000183131	0.0738634	ENSMUSG00000015748	Prpf3	chr3	-	95835643	95835743	1.89204e-07	0.000336856
ENSMUSG00000030094	Xpc	chr6	-	91496087	91498190	2.37182e-05	0.00209872	ENSMUSG00000085385	Snhg17	chr2	-	158360463	158360599	0.000345981	0.025535	ENSMUSG00000026708	Cenpl	chr1	+	161078228	161078480	0.000157753	0.0183399	ENSMUSG00000025239	Limd1	chr9	+	123500130	123500232	0.000206908	0.0797011	ENSMUSG00000042625	Safb2	chr17	-	56578640	56578844	1.96576e-07	0.000339982
ENSMUSG00000025142	Aspscr1	chr11	+	120708929	120709246	2.51714e-05	0.00216544	ENSMUSG00000085385	Snhg17	chr2	-	158360458	158360599	0.000383425	0.0269889	ENSMUSG00000030638	Sh3gl3	chr7	+	82268279	82268352	0.000169716	0.0191826	ENSMUSG00000042626	Shc1	chr3	+	89423696	89423816	0.000221018	0.0827713	ENSMUSG00000030701	Plekhb1	chr7	-	100649927	100650032	2.38635e-07	0.000401258
ENSMUSG00000026349	Ccnt2	chr1	+	127791604	127795800	3.05213e-05	0.00251852	ENSMUSG00000062753	AI413582	chr17	-	27564561	27564750	0.0004587	0.0314148	ENSMUSG00000028741	Mrto4	chr4	-	139349613	139349847	0.000189456	0.0197665	ENSMUSG00000061904	Slc25a3	chr10	-	91121921	91122043	0.000263483	0.0960076	ENSMUSG00000034422	Parp14	chr16	-	35860429	35860666	2.8069e-07	0.000459216
ENSMUSG00000020372	Rack1	chr11	+	48801662	48802420	3.12877e-05	0.00251852	ENSMUSG00000053332	Gas5	chr1	+	161036819	161037315	0.000517015	0.0344767	ENSMUSG00000018433	Nol11	chr11	-	107173209	107173461	0.00018763	0.0197665	ENSMUSG00000053580	Tanc2	chr11	+	105673419	105673491	0.000277933	0.0960794	ENSMUSG00000031565	Fgfr1	chr8	+	25563373	25563524	2.93955e-07	0.000468263
ENSMUSG00000015757	Ppil4	chr10	+	7797757	7798557	3.17153e-05	0.00251852	ENSMUSG00000031310	Zmym3	chrX	-	101418272	101418952	0.000551589	0.0349432	ENSMUSG00000028289	Epha7	chr4	+	28947527	28947653	0.000185668	0.0197665	ENSMUSG00000030452	Nipa2	chr7	-	55944958	55945085	0.000277431	0.0960794	ENSMUSG00000042423	Fbrs	chr7	+	127486859	127486889	3.73313e-07	0.000570043
ENSMUSG00000020745	Pafah1b1	chr11	-	74673948	74679614	3.44523e-05	0.00266747	ENSMUSG00000037321	Tap1	chr17	+	34189177	34190768	0.000539309	0.0349432	ENSMUSG00000026150	Mff	chr1	+	82735415	82735507	0.000197996	0.0201412									ENSMUSG00000032294	Pkm	chr9	+	59675028	59675195	3.76683e-07	0.000570043
ENSMUSG00000031388	Naa10	chrX	-	73919501	73919869	4.00872e-05	0.00302805	ENSMUSG00000071337	Tia1	chr6	+	86424961	86425203	0.000575224	0.0355517	ENSMUSG00000028522	Mier1	chr4	+	103118238	103118315	0.000219142	0.0217485									ENSMUSG00000031508	Ankrd10	chr8	-	11620261	11620373	4.23716e-07	0.000625581
ENSMUSG00000019802	Sec63	chr10	+	42796205	42798855	4.12907e-05	0.00304469	ENSMUSG00000070003	Ssbp4	chr8	-	70602400	70602462	0.000605948	0.0365589	ENSMUSG00000028522	Mier1	chr4	+	103118241	103118315	0.000240654	0.0232268									ENSMUSG00000037400	Atp11b	chr3	+	35798593	35798658	4.39024e-07	0.000632749
ENSMUSG00000022536	Glyr1	chr16	-	5048749	5049857	4.28805e-05	0.0030884	ENSMUSG00000036503	Rnf13	chr3	+	57796197	57796295	0.000631661	0.0372239	ENSMUSG00000028218	Fam92a	chr4	-	12168964	12169058	0.000245454	0.0232268									ENSMUSG00000029165	Agbl5	chr5	+	30905017	30905155	4.72643e-07	0.00066536
ENSMUSG00000038346	Zfp384	chr6	+	125024032	125025082	4.88964e-05	0.00344164	ENSMUSG00000038174	Fam126b	chr1	-	58565767	58565954	0.000664348	0.0382604	ENSMUSG00000033055	Ankrd54	chr15	-	79057954	79058053	0.000254949	0.023577									ENSMUSG00000044950	Pwwp2a	chr11	+	43717029	43717149	4.89918e-07	0.000674005
ENSMUSG00000052488	Cherp	chr8	-	72469863	72470227	5.27775e-05	0.00363226	ENSMUSG00000026927	Sdccag3	chr2	-	26385497	26386063	0.000683842	0.0385079	ENSMUSG00000061306	Slc38a10	chr11	-	120138985	120139129	0.000263307	0.0238088									ENSMUSG00000029924	Slc37a3	chr6	-	39367643	39367766	5.06444e-07	0.000681257
ENSMUSG00000032316	Clk3	chr9	-	57758626	57761040	5.43679e-05	0.00366038	ENSMUSG00000048058	Ldlrad3	chr2	-	102113532	102113679	0.000699265	0.0385204	ENSMUSG00000000530	Acvrl1	chr15	+	101134606	101134743	0.000312218	0.0266788									ENSMUSG00000030172	Erc1	chr6	-	119777987	119778071	5.34631e-07	0.00070354
ENSMUSG00000028102	Pex11b	chr3	+	96643574	96644726	6.38818e-05	0.0042094	ENSMUSG00000011257	Pabpc4	chr4	+	123288958	123289213	0.00074757	0.039201	ENSMUSG00000010453	Kansl3	chr1	-	36365481	36365652	0.000321273	0.0266788									ENSMUSG00000030201	Lrp6	chr6	-	134541651	134542045	5.61789e-07	0.000723548
ENSMUSG00000020059	Sycp3	chr10	+	88472675	88473236	6.6712e-05	0.00430432	ENSMUSG00000007458	M6pr	chr6	+	122313258	122315166	0.00075803	0.039201	ENSMUSG00000031982	Arv1	chr8	+	124728328	124728482	0.000303684	0.0266788									ENSMUSG00000001036	Epn2	chr11	-	61548007	61548042	6.04456e-07	0.000762282
ENSMUSG00000085385	Snhg17	chr2	-	158357197	158360599	7.03374e-05	0.00444561	ENSMUSG00000030815	Phkg2	chr7	+	127577534	127577710	0.000755484	0.039201	ENSMUSG00000000759	Tubgcp3	chr8	-	12648620	12649822	0.000315945	0.0266788									ENSMUSG00000087165	2010001A14Rik	chr11	-	57796025	57796173	6.51877e-07	0.000805308
ENSMUSG00000000901	Mmp11	chr10	-	75923221	75924115	7.75951e-05	0.00480278	ENSMUSG00000010110	Stx5a	chr19	+	8743352	8743502	0.000775201	0.0392872	ENSMUSG00000028060	2810403A07Rik	chr3	+	88700260	88700514	0.000349036	0.0278476									ENSMUSG00000035351	Nup37	chr10	+	88177072	88177166	6.9535e-07	0.000841833
ENSMUSG00000022111	Uchl3	chr14	+	101665760	101668576	8.06409e-05	0.00480278	ENSMUSG00000040123	Zmym5	chr14	-	56797667	56797830	0.000795841	0.0395424	ENSMUSG00000030083	Abtb1	chr6	-	88838117	88838285	0.000347384	0.0278476									ENSMUSG00000029998	Pcyox1	chr6	-	86394408	86394583	7.35465e-07	0.000842968
ENSMUSG00000015790	Surf1	chr2	-	26915595	26916006	8.05584e-05	0.00480278	ENSMUSG00000074151	Nlrc5	chr8	+	94484069	94484156	0.00101028	0.0492318	ENSMUSG00000037487	Ubr5	chr15	-	37973302	37975671	0.000396175	0.0281869									ENSMUSG00000030172	Erc1	chr6	-	119777978	119778071	7.13329e-07	0.000842968
ENSMUSG00000024454	Hdac3	chr18	-	37941378	37941766	8.36376e-05	0.00488728	ENSMUSG00000085385	Snhg17	chr2	-	158360458	158360599	0.00112512	0.0537936	ENSMUSG00000037876	Jmjd1c	chr10	+	67218037	67218181	0.000403226	0.0281869									ENSMUSG00000026482	Rgl1	chr1	-	152623817	152623928	7.38065e-07	0.000842968
ENSMUSG00000000759	Tubgcp3	chr8	-	12648620	12649822	8.83605e-05	0.00506764	ENSMUSG00000079018	Ly6c1	chr15	-	75048753	75048813	0.00121231	0.056443	ENSMUSG00000020828	Pld2	chr11	+	70555298	70555381	0.000405867	0.0281869									ENSMUSG00000036160	Surf6	chr2	-	26892866	26893067	7.95124e-07	0.000886496
ENSMUSG00000017418	Arl5b	chr2	+	15076255	15082452	0.000106543	0.00589221	ENSMUSG00000025962	Fastkd2	chr1	+	63735462	63735968	0.00122508	0.056443	ENSMUSG00000028601	Echdc2	chr4	+	108172738	108172972	0.000406129	0.0281869									ENSMUSG00000049076	Acap2	chr16	-	31153705	31153759	8.20111e-07	0.000886496
ENSMUSG00000015536	Mocs2	chr13	+	114825210	114826281	0.000105476	0.00589221	ENSMUSG00000027829	Ccnl1	chr3	-	65955129	65955276	0.00128959	0.0583538	ENSMUSG00000072946	Ptgr2	chr12	+	84310902	84310958	0.00039022	0.0281869									ENSMUSG00000020225	Tmbim4	chr10	+	120217503	120217609	8.13911e-07	0.000886496
ENSMUSG00000049659	Aftph	chr11	-	20696750	20698373	0.000116238	0.00631559	ENSMUSG00000009995	Taz	chrX	+	74288450	74289019	0.00143337	0.0637223	ENSMUSG00000030727	Rabep2	chr7	+	126444522	126444936	0.000369173	0.0281869									ENSMUSG00000030747	Dgat2	chr7	-	99169697	99169826	1.01353e-06	0.00107635
ENSMUSG00000022800	Fyttd1	chr16	+	32898373	32898939	0.000121766	0.00650188	ENSMUSG00000060568	Fam78b	chr1	+	167078536	167079785	0.00147088	0.0642622	ENSMUSG00000035632	Cnot3	chr7	+	3653196	3653419	0.000408706	0.0281869									ENSMUSG00000032966	Fkbp1a	chr2	+	151543905	151544140	1.0501e-06	0.00109596
ENSMUSG00000026848	Tor1b	chr2	+	30953751	30955953	0.000125097	0.0065111	ENSMUSG00000022803	Popdc2	chr16	+	38373818	38374377	0.00154403	0.0663148	ENSMUSG00000006676	Usp19	chr9	+	108498122	108498241	0.00037911	0.0281869									ENSMUSG00000038244	Mical2	chr7	+	112345245	112345353	1.06906e-06	0.00109684
ENSMUSG00000033237	Arid2	chr15	+	96391103	96392478	0.000126143	0.0065111	ENSMUSG00000046364	Rpl27a	chr7	+	109519584	109519993	0.00161609	0.0665277	ENSMUSG00000058318	Phf21a	chr2	+	92230637	92230724	0.000446783	0.0302993									ENSMUSG00000000884	Gnb1l	chr16	+	18552408	18552582	1.15856e-06	0.00116885
ENSMUSG00000021431	Snrnp48	chr13	+	38217373	38220776	0.000152473	0.00761625	ENSMUSG00000004677	Myo9b	chr8	+	71350134	71350195	0.00161085	0.0665277	ENSMUSG00000026843	Fubp3	chr2	+	31592462	31592496	0.00046915	0.0312946									ENSMUSG00000055436	Srsf11	chr3	-	158024122	158024231	1.18511e-06	0.00117603
ENSMUSG00000071646	Mta2	chr19	+	8946266	8946750	0.000151957	0.00761625	ENSMUSG00000014791	Elmo3	chr8	+	105305966	105306007	0.00162775	0.0665277	ENSMUSG00000057594	Arl16	chr11	-	120466653	120466767	0.000503814	0.0330648									ENSMUSG00000029578	Wipi2	chr5	+	142665422	142665530	1.3267e-06	0.00129531
ENSMUSG00000020949	Fkbp3	chr12	-	65063677	65069109	0.000155673	0.0076527	ENSMUSG00000026921	Egfl7	chr2	+	26592117	26592280	0.00172893	0.0695415	ENSMUSG00000064043	Trerf1	chr17	+	47317767	47317921	0.000512291	0.0330875									ENSMUSG00000024436	Mrps18b	chr17	-	35912337	35912404	1.45758e-06	0.00137862
ENSMUSG00000027245	Hypk	chr2	+	121457645	121458043	0.00016925	0.00819012	ENSMUSG00000024037	Wdr4	chr17	-	31509768	31509912	0.00189944	0.0739021	ENSMUSG00000007817	Zmiz1	chr14	+	25646716	25647007	0.000529075	0.0331201									ENSMUSG00000032615	Nt5m	chr11	+	59852790	59852891	1.43494e-06	0.00137862
ENSMUSG00000013593	Ndufs2	chr1	-	171237944	171238372	0.000183149	0.00872636	ENSMUSG00000027091	Zc3h15	chr2	+	83658529	83658621	0.0019227	0.0739021	ENSMUSG00000016494	Cd34	chr1	+	194959779	194961279	0.000525628	0.0331201									ENSMUSG00000040557	Mettl27	chr5	+	134934288	134934424	1.50198e-06	0.00139768
ENSMUSG00000040459	Arglu1	chr8	-	8681383	8683973	0.000186917	0.00877094	ENSMUSG00000029524	Sirt4	chr5	-	115482574	115483118	0.00192484	0.0739021	ENSMUSG00000028464	Tpm2	chr4	-	43518401	43519078	0.000563254	0.0342072									ENSMUSG00000032336	Nptn	chr9	+	58651257	58651332	1.52391e-06	0.00139768
ENSMUSG00000037112	Sik2	chr9	-	50892800	50895961	0.000220733	0.0102031	ENSMUSG00000034254	Agpat1	chr17	+	34610871	34611005	0.0019718	0.0740384	ENSMUSG00000038346	Zfp384	chr6	+	125024745	125025082	0.000556903	0.0342072									ENSMUSG00000029480	Dhx37	chr5	-	125423426	125423571	1.57826e-06	0.00140495
ENSMUSG00000039536	Stau1	chr2	-	166951270	166952472	0.000267882	0.0122004	ENSMUSG00000022789	Dnm1l	chr16	-	16345979	16346145	0.00198682	0.0740384	ENSMUSG00000028809	Srrm1	chr4	-	135340502	135340622	0.000575659	0.0344464									ENSMUSG00000028478	Clta	chr4	+	44019873	44019991	1.55895e-06	0.00140495
ENSMUSG00000021235	Coq6	chr12	+	84370255	84371558	0.000276761	0.0124221	ENSMUSG00000007850	Hnrnph1	chr11	+	50383830	50383920	0.0020802	0.0763945	ENSMUSG00000045411	2410002F23Rik	chr7	+	44247237	44247416	0.000598583	0.035299									ENSMUSG00000061887	Ssbp3	chr4	+	107027216	107027297	1.63082e-06	0.00142336
ENSMUSG00000020719	Ddx5	chr11	-	106782468	106784018	0.000280873	0.0124266	ENSMUSG00000038954	Supt3	chr17	+	45041215	45041386	0.002309	0.0800636	ENSMUSG00000005882	Uqcc1	chr2	-	155910356	155910467	0.000621676	0.0356282									ENSMUSG00000025558	Dock9	chr14	-	121591811	121591879	1.64597e-06	0.00142336
ENSMUSG00000007379	Dennd2c	chr3	+	103133214	103133851	0.000305824	0.01334	ENSMUSG00000040263	Klhdc4	chr8	-	121821279	121821358	0.00221998	0.0800636	ENSMUSG00000029022	Miip	chr4	-	147860790	147861085	0.000616771	0.0356282									ENSMUSG00000068115	Ninl	chr2	-	150969979	150970132	1.67915e-06	0.00143003
ENSMUSG00000052926	Rnaseh2a	chr8	-	84957666	84958089	0.000311789	0.0134112	ENSMUSG00000030180	Kdm5a	chr6	+	120398937	120399082	0.0023154	0.0800636	ENSMUSG00000022199	Slc22a17	chr14	-	54908822	54908988	0.000641425	0.0362494									ENSMUSG00000003955	Fam162a	chr16	-	36046378	36046487	1.72456e-06	0.00143003
ENSMUSG00000010057	Nprl2	chr9	+	107544597	107544840	0.000343277	0.0145634	ENSMUSG00000023007	Prpf40b	chr15	+	99315479	99315581	0.00229007	0.0800636	ENSMUSG00000026972	Arrdc1	chr2	-	24926271	24926448	0.000653377	0.0364191									ENSMUSG00000022856	Tmem41a	chr16	-	21936980	21937119	1.70562e-06	0.00143003
ENSMUSG00000041560	Nop53	chr7	-	15937837	15938230	0.000377756	0.0158096	ENSMUSG00000000131	Xpo6	chr7	-	126151223	126153279	0.00233808	0.0800636	ENSMUSG00000026153	Fam135a	chr1	-	24028199	24030528	0.000717271	0.0394402									ENSMUSG00000036054	Sugp2	chr8	+	70260468	70261317	1.80561e-06	0.00147702
ENSMUSG00000041921	Metap1d	chr2	+	71509740	71511560	0.000425616	0.0175751	ENSMUSG00000024921	Smarca2	chr19	+	26748405	26748952	0.00241864	0.0817178	ENSMUSG00000028608	0610037L13Rik	chr4	+	107891954	107892036	0.000742556	0.0402861									ENSMUSG00000005378	Bud23	chr5	-	135056027	135056086	1.8725e-06	0.00151131
ENSMUSG00000030846	Tial1	chr7	-	128443806	128444404	0.000441331	0.0179843	ENSMUSG00000004455	Ppp1cc	chr5	+	122172731	122172955	0.00251431	0.0838323	ENSMUSG00000014599	Csf1	chr3	-	107748153	107749169	0.000752666	0.0402973									ENSMUSG00000020770	Unk	chr11	+	116050686	116050804	1.90065e-06	0.00151384
ENSMUSG00000025155	Dus1l	chr11	-	120793027	120793946	0.000450379	0.0181146	ENSMUSG00000040599	Mis12	chr11	+	71019610	71020189	0.00275444	0.090646	ENSMUSG00000034327	Kctd9	chr14	+	67729223	67729409	0.00076615	0.0404865									ENSMUSG00000025912	Mybl1	chr1	-	9681784	9681889	1.95821e-06	0.00152063
ENSMUSG00000028057	Rit1	chr3	+	88717325	88717658	0.00046572	0.0184915	ENSMUSG00000073758	Sh3d21	chr4	-	126152023	126152258	0.0028706	0.0932576	ENSMUSG00000054434	Tmem120b	chr5	+	123101610	123101684	0.000788783	0.0411482									ENSMUSG00000031392	Irak1	chrX	-	74021848	74021963	1.95941e-06	0.00152063
ENSMUSG00000010110	Stx5a	chr19	+	8743079	8743423	0.000539031	0.0211314	ENSMUSG00000045795	Whamm	chr7	+	81574545	81574719	0.00301606	0.0954705	ENSMUSG00000020840	Blmh	chr11	+	76949959	76951185	0.000818474	0.0421566									ENSMUSG00000031996	Aplp2	chr9	-	31156189	31156225	2.06402e-06	0.00158153
ENSMUSG00000040688	Tbl3	chr17	-	24704810	24705317	0.000571858	0.0218647	ENSMUSG00000026471	Mr1	chr1	-	155137513	155137774	0.00303841	0.0954705	ENSMUSG00000085385	Snhg17	chr2	-	158359181	158359432	0.000835453	0.0424932									ENSMUSG00000031169	Porcn	chrX	-	8197974	8198085	2.19367e-06	0.00163938
ENSMUSG00000028689	Ccdc163	chr4	+	116709239	116709619	0.000569009	0.0218647	ENSMUSG00000024889	Rce1	chr19	-	4624659	4624763	0.00308942	0.0954705	ENSMUSG00000071064	Zfp827	chr8	+	79178889	79179079	0.000925183	0.0464762									ENSMUSG00000020778	Ten1	chr11	+	116205610	116205768	2.17733e-06	0.00163938
ENSMUSG00000021748	Pdhb	chr14	-	8171422	8172817	0.000600581	0.0226829	ENSMUSG00000028073	Pear1	chr3	-	87759352	87759581	0.00308703	0.0954705	ENSMUSG00000022440	C1qtnf6	chr15	-	78523345	78525398	0.000984292	0.0488425									ENSMUSG00000037210	Fam193a	chr5	+	34440347	34440590	2.32794e-06	0.00165785
ENSMUSG00000053332	Gas5	chr1	+	161037287	161037547	0.000639338	0.0238558	ENSMUSG00000005417	Mprip	chr11	+	59737071	59737582	0.00318178	0.0960352	ENSMUSG00000026333	Gin1	chr1	+	97782926	97783232	0.00101498	0.0497584									ENSMUSG00000027259	Adal	chr2	+	121142523	121142654	2.31629e-06	0.00165785
ENSMUSG00000022884	Eif4a2	chr16	+	23110579	23111263	0.000710727	0.0258956	ENSMUSG00000006638	Abhd1	chr5	+	30950065	30950248	0.00318349	0.0960352	ENSMUSG00000027088	Phospho2	chr2	+	69792336	69792491	0.00107717	0.0512218									ENSMUSG00000043079	Synpo	chr18	-	60609910	60610001	2.28691e-06	0.00165785
ENSMUSG00000024410	3110002H16Rik	chr18	+	12183978	12184262	0.00071019	0.0258956									ENSMUSG00000001844	Zdhhc4	chr5	-	143324131	143324398	0.00106209	0.0512218									ENSMUSG00000054484	Tmem62	chr2	+	120993477	120993637	2.31538e-06	0.00165785
ENSMUSG00000040940	Arhgef1	chr7	+	24918519	24919351	0.000825067	0.029712									ENSMUSG00000031626	Sorbs2	chr8	+	45823728	45823835	0.00108259	0.0512218									ENSMUSG00000040746	Rnf167	chr11	+	70648407	70648592	2.4992e-06	0.00175912
ENSMUSG00000057193	Slc44a2	chr9	+	21342394	21342658	0.000967115	0.0344271									ENSMUSG00000038695	Josd2	chr7	+	44470858	44471307	0.00110917	0.051876									ENSMUSG00000102805	Gm37240	chr3	-	85817171	85817291	2.74122e-06	0.00189647
ENSMUSG00000085385	Snhg17	chr2	-	158359181	158360599	0.00110974	0.0390553									ENSMUSG00000073888	Ccl27a	chr4	-	41771137	41771290	0.00113674	0.0525613									ENSMUSG00000029163	Emilin1	chr5	+	30914981	30915107	2.757e-06	0.00189647
ENSMUSG00000019261	Map1s	chr8	+	70910944	70912653	0.00119483	0.0415775									ENSMUSG00000055204	Ankrd17	chr5	-	90278242	90278391	0.00122864	0.0558132									ENSMUSG00000038080	Kdm1b	chr13	+	47068463	47068635	3.22715e-06	0.00219493
ENSMUSG00000030083	Abtb1	chr6	-	88836524	88838285	0.00130617	0.0449469									ENSMUSG00000022469	Rapgef3	chr15	-	97757682	97757814	0.0012345	0.0558132									ENSMUSG00000016921	Srsf6	chr2	+	162932814	162932979	3.44709e-06	0.00231848
ENSMUSG00000028469	Npr2	chr4	+	43643605	43644187	0.00133279	0.0453589									ENSMUSG00000023150	Ivns1abp	chr1	+	151355166	151356236	0.00126337	0.0564907									ENSMUSG00000023034	Nr4a1	chr15	+	101271735	101271865	3.70446e-06	0.0024642
ENSMUSG00000014873	Surf2	chr2	+	26917427	26919055	0.00144417	0.0480923									ENSMUSG00000026584	Scyl3	chr1	+	163941020	163941218	0.0014048	0.0610271									ENSMUSG00000019188	H13	chr2	+	152688662	152688748	3.78862e-06	0.00248379
ENSMUSG00000005687	Bcas2	chr3	+	103175618	103177419	0.00143571	0.0480923									ENSMUSG00000022552	Sharpin	chr15	-	76347663	76347807	0.00139772	0.0610271									ENSMUSG00000024962	Vegfb	chr19	-	6986773	6986816	3.81597e-06	0.00248379
ENSMUSG00000003038	Hmgn2	chr4	-	133966428	133966795	0.00149094	0.0491217									ENSMUSG00000030663	1110004F10Rik	chr7	+	116103194	116103320	0.00141879	0.0610271									ENSMUSG00000057177	Gsk3a	chr7	-	25231833	25231964	4.07532e-06	0.00262438
ENSMUSG00000017221	Psmd3	chr11	+	98690462	98691019	0.00160204	0.0522264									ENSMUSG00000056851	Pcbp2	chr15	+	102489751	102489807	0.00142482	0.0610271									ENSMUSG00000032480	Dhx30	chr9	-	110084728	110084868	4.17442e-06	0.0026599
ENSMUSG00000031939	Taf1d	chr9	+	15313989	15314264	0.00165847	0.0529513									ENSMUSG00000022255	Mtdh	chr15	+	34136673	34136827	0.00150401	0.0637479									ENSMUSG00000055436	Srsf11	chr3	-	158023242	158023359	4.24323e-06	0.00267558
ENSMUSG00000041319	Thoc6	chr17	-	23668975	23669306	0.00164322	0.0529513									ENSMUSG00000073888	Ccl27a	chr4	-	41771137	41771235	0.00155306	0.0651487									ENSMUSG00000036257	Pnpla8	chr12	+	44304910	44305105	4.35465e-06	0.00271752
ENSMUSG00000072501	Phf20l1	chr15	+	66622760	66624099	0.00189846	0.0599951									ENSMUSG00000034190	Chmp7	chr14	-	69719128	69719867	0.0016471	0.0683881									ENSMUSG00000043962	Thrap3	chr4	-	126184930	126185142	4.60605e-06	0.00284508
ENSMUSG00000008690	Ncaph2	chr15	+	89363604	89363834	0.00207067	0.0641923									ENSMUSG00000061436	Hipk2	chr6	-	38721454	38721597	0.00169547	0.0696854									ENSMUSG00000038388	Mpp6	chr6	+	50176876	50176918	4.73732e-06	0.00288837
ENSMUSG00000026958	Dpp7	chr2	-	25354892	25355721	0.00207272	0.0641923									ENSMUSG00000026309	Ilkap	chr1	-	91388344	91388464	0.00177895	0.0709663									ENSMUSG00000039813	Tbc1d2	chr4	-	46615026	46615208	4.77156e-06	0.00288837
ENSMUSG00000019907	Ppp1r12a	chr10	+	108261244	108262431	0.00210975	0.064692									ENSMUSG00000022899	Slc15a2	chr16	-	36761563	36761712	0.00177498	0.0709663									ENSMUSG00000020778	Ten1	chr11	+	116204844	116204979	4.88166e-06	0.00292576
ENSMUSG00000020307	Cdc34	chr10	+	79685004	79685367	0.00228418	0.0691821									ENSMUSG00000038039	Gcc2	chr10	+	58256746	58256904	0.00175946	0.0709663									ENSMUSG00000023007	Prpf40b	chr15	+	99303282	99303363	4.95331e-06	0.00293959
ENSMUSG00000021948	Prkcd	chr14	-	30605439	30605901	0.00230086	0.0691821									ENSMUSG00000033411	Ctdspl2	chr2	+	121977330	121977469	0.00180927	0.071475									ENSMUSG00000091625	Lsm5	chr6	-	56703005	56703409	5.06846e-06	0.00297873
ENSMUSG00000005481	Ddx39	chr8	+	83721733	83722361	0.00238681	0.0697353									ENSMUSG00000001082	Mfsd10	chr5	-	34634590	34634699	0.00193688	0.0750588									ENSMUSG00000030659	Nucb2	chr7	+	116506017	116506098	5.38931e-06	0.00307765
ENSMUSG00000030890	Ilk	chr7	+	105741373	105741707	0.00236448	0.0697353									ENSMUSG00000025268	Maged2	chrX	-	150808720	150809152	0.00193544	0.0750588									ENSMUSG00000000301	Pemt	chr11	-	60031712	60031820	5.32716e-06	0.00307765
ENSMUSG00000003848	Nob1	chr8	-	107416105	107417091	0.00237426	0.0697353									ENSMUSG00000000738	Spg7	chr8	+	123090074	123090234	0.00199341	0.0765206									ENSMUSG00000091625	Lsm5	chr6	-	56703005	56703033	5.36106e-06	0.00307765
ENSMUSG00000056394	Lig1	chr7	+	13305909	13306055	0.00244051	0.0706378									ENSMUSG00000028601	Echdc2	chr4	+	108172750	108172972	0.00201761	0.0767257									ENSMUSG00000031422	Morf4l2	chrX	-	136735545	136735622	5.50941e-06	0.00311683
ENSMUSG00000028954	Nub1	chr5	+	24694699	24695590	0.00249789	0.0709721									ENSMUSG00000035900	Gramd4	chr15	+	86129619	86129721	0.00205124	0.0772823									ENSMUSG00000027829	Ccnl1	chr3	-	65950212	65950226	5.94719e-06	0.00332412
ENSMUSG00000094870	Zfp131	chr13	-	119775766	119776449	0.00248238	0.0709721									ENSMUSG00000051323	Pcdh19	chrX	-	133625268	133625441	0.00215052	0.0802794									ENSMUSG00000021902	Phf7	chr14	-	31240273	31240433	5.98565e-06	0.00332412
ENSMUSG00000015697	Setdb1	chr3	-	95337148	95339032	0.00261281	0.0711912									ENSMUSG00000056851	Pcbp2	chr15	+	102489751	102489807	0.0022116	0.0818091									ENSMUSG00000111497	Gm38431	chr9	-	21079208	21079514	6.0647e-06	0.00333741
ENSMUSG00000039660	Spout1	chr2	-	30177322	30177965	0.00258423	0.0711912									ENSMUSG00000034758	Tle6	chr10	-	81595322	81595405	0.00234601	0.0859994									ENSMUSG00000022498	Txndc11	chr16	-	11087776	11088569	6.2439e-06	0.00338946
ENSMUSG00000070436	Serpinh1	chr7	-	99352881	99353114	0.00264004	0.0711912									ENSMUSG00000027404	Snrpb	chr2	-	130172602	130173174	0.0024202	0.0879267									ENSMUSG00000056025	Clca3a1	chr3	-	144757957	144758066	6.27128e-06	0.00338946
ENSMUSG00000074796	Slc4a11	chr2	-	130687158	130687484	0.00264352	0.0711912									ENSMUSG00000040563	Plppr2	chr9	+	21940684	21940873	0.00259697	0.093514									ENSMUSG00000032480	Dhx30	chr9	-	110084780	110084868	6.52936e-06	0.00346703
ENSMUSG00000024137	E4f1	chr17	-	24443778	24444476	0.00258111	0.0711912									ENSMUSG00000022617	Chkb	chr15	-	89428410	89428578	0.0026463	0.0936329									ENSMUSG00000009585	Apobec3	chr15	+	79899019	79899118	6.50882e-06	0.00346703
ENSMUSG00000001416	Cct3	chr3	+	88300799	88300991	0.00254302	0.0711912									ENSMUSG00000041351	Rap1gap	chr4	+	137727676	137727779	0.0026291	0.0936329									ENSMUSG00000029687	Ezh2	chr6	-	47546748	47546830	6.71147e-06	0.00353274
ENSMUSG00000029290	Zfp326	chr5	+	105886316	105888839	0.00269627	0.0719857									ENSMUSG00000037266	Rsrp1	chr4	+	134926025	134926818	0.00275472	0.0966288									ENSMUSG00000028573	Fggy	chr4	+	95844072	95844193	6.77748e-06	0.00353674
ENSMUSG00000009741	Ubp1	chr9	+	113955962	113956813	0.00280543	0.07426									ENSMUSG00000005687	Bcas2	chr3	+	103173233	103173345	0.00286473	0.0996291									ENSMUSG00000032849	Abcc4	chr14	-	118507592	118507682	6.96219e-06	0.003591
ENSMUSG00000026269	Rnpepl1	chr1	+	92918017	92919103	0.00289369	0.075947																									ENSMUSG00000028262	Clca3a2	chr3	-	144802931	144803099	7.01519e-06	0.003591
ENSMUSG00000027829	Ccnl1	chr3	-	65948690	65950544	0.0030265	0.0787653																									ENSMUSG00000035569	Ankrd11	chr8	-	122889638	122896156	7.07255e-06	0.003591
ENSMUSG00000031939	Taf1d	chr9	+	15315382	15316978	0.00307506	0.0793622																									ENSMUSG00000060671	Atp8b2	chr3	-	89945920	89946137	7.11877e-06	0.003591
ENSMUSG00000039483	Asb6	chr2	-	30824640	30825560	0.00311832	0.0798136																									ENSMUSG00000040774	Cept1	chr3	-	106520008	106520093	7.34372e-06	0.00367386
ENSMUSG00000037907	Ankrd13b	chr11	-	77470484	77472378	0.00321948	0.0817272																									ENSMUSG00000029101	Rgs12	chr5	+	35021115	35021259	7.48447e-06	0.00371359
ENSMUSG00000020741	Cluh	chr11	+	74664030	74664926	0.00328468	0.0827045																									ENSMUSG00000021785	Ngly1	chr14	+	16277798	16278021	8.02701e-06	0.0039504
ENSMUSG00000025485	Ric8a	chr7	+	140857981	140858572	0.00335415	0.0831023																									ENSMUSG00000029810	Tmem176b	chr6	-	48840360	48840453	8.40864e-06	0.00410484
ENSMUSG00000022216	Psme1	chr14	+	55579770	55580041	0.0033356	0.0831023																									ENSMUSG00000022103	Gfra2	chr14	+	70901488	70901572	8.94611e-06	0.0041826
ENSMUSG00000031171	Ftsj1	chrX	-	8246335	8246780	0.00352934	0.0867488																									ENSMUSG00000031201	Brcc3	chrX	+	75417576	75417593	8.85105e-06	0.0041826
ENSMUSG00000004455	Ppp1cc	chr5	+	122172731	122173280	0.00356457	0.0869249																									ENSMUSG00000039477	Tnrc18	chr5	-	142755380	142755659	9.10048e-06	0.0041826
ENSMUSG00000021262	Evl	chr12	+	108683194	108683410	0.00375577	0.090872																									ENSMUSG00000030763	Lcmt1	chr7	+	123428093	123428191	8.67378e-06	0.0041826
ENSMUSG00000021282	Eif5	chr12	+	111539407	111540302	0.00379042	0.0909993																									ENSMUSG00000022791	Tnk2	chr16	+	32680899	32680995	9.08266e-06	0.0041826
ENSMUSG00000035086	Becn1	chr11	-	101295533	101296316	0.00392632	0.0919484																									ENSMUSG00000111497	Gm38431	chr9	-	21076566	21076641	9.07574e-06	0.0041826
ENSMUSG00000028959	Fastk	chr5	-	24441527	24441823	0.0039487	0.0919484																									ENSMUSG00000044864	Ankrd50	chr3	-	38454040	38457585	8.80341e-06	0.0041826
ENSMUSG00000030330	Ing4	chr6	+	125047481	125048237	0.0038818	0.0919484																									ENSMUSG00000030530	Furin	chr7	-	80395334	80395507	9.12069e-06	0.0041826
ENSMUSG00000002968	Med25	chr7	-	44879390	44880104	0.00393569	0.0919484																									ENSMUSG00000030800	Prss8	chr7	-	127927808	127927971	9.68041e-06	0.0044059
ENSMUSG00000022203	Efs	chr14	-	54920902	54921181	0.00403721	0.0926166																									ENSMUSG00000058070	Eml1	chr12	+	108536226	108536322	9.9979e-06	0.00451644
ENSMUSG00000006215	Zbtb17	chr4	+	141464236	141464702	0.00403291	0.0926166																									ENSMUSG00000017428	Psmd11	chr11	+	80438520	80438630	1.00894e-05	0.004524
ENSMUSG00000020362	Cnot6	chr11	-	49685086	49685352	0.00419612	0.0948569																									ENSMUSG00000030747	Dgat2	chr7	-	99164634	99164705	1.03144e-05	0.00459089
ENSMUSG00000038102	Trappc11	chr8	-	47513282	47513808	0.00416774	0.0948569																									ENSMUSG00000026970	Rbms1	chr2	-	60759758	60759806	1.04068e-05	0.00459821
ENSMUSG00000030890	Ilk	chr7	+	105740512	105741043	0.00439788	0.0986974																									ENSMUSG00000026932	Nacc2	chr2	-	26062191	26062297	1.07803e-05	0.00472871
																																ENSMUSG00000031825	Crispld2	chr8	+	120014009	120014128	1.08688e-05	0.00473325
																																ENSMUSG00000030008	Pradc1	chr6	-	85448490	85448591	1.10045e-05	0.00475812
																																ENSMUSG00000051331	Cacna1c	chr6	-	118638426	118638510	1.16854e-05	0.00501666
																																ENSMUSG00000030409	Dmpk	chr7	+	19092542	19092632	1.18682e-05	0.00504107
																																ENSMUSG00000111497	Gm38431	chr9	-	21076566	21076641	1.1992e-05	0.00504107
																																ENSMUSG00000018565	Elp5	chr11	-	69969095	69969196	1.19913e-05	0.00504107
																																ENSMUSG00000042289	Hsd3b7	chr7	+	127801391	127801616	1.25768e-05	0.00525042
																																ENSMUSG00000030409	Dmpk	chr7	+	19092546	19092632	1.27656e-05	0.00529274
																																ENSMUSG00000026131	Dst	chr1	+	34301860	34301932	1.30352e-05	0.00536776
																																ENSMUSG00000022789	Dnm1l	chr16	-	16342696	16342735	1.36722e-05	0.00559148
																																ENSMUSG00000031987	Egln1	chr8	-	124914016	124914153	1.37632e-05	0.00559148
																																ENSMUSG00000018565	Elp5	chr11	-	69975039	69975260	1.4224e-05	0.00574015
																																ENSMUSG00000018565	Elp5	chr11	-	69970560	69970742	1.43645e-05	0.00575846
																																ENSMUSG00000028597	Gpx7	chr4	-	108403200	108403462	1.47588e-05	0.00587758
																																ENSMUSG00000079014	Serpina3i	chr12	+	104266444	104266718	1.52019e-05	0.0060145
																																ENSMUSG00000025580	Eif4a3	chr11	-	119295472	119295535	1.53785e-05	0.00604485
																																ENSMUSG00000036553	Sh3tc1	chr5	-	35701850	35702001	1.58922e-05	0.00620648
																																ENSMUSG00000078350	Smim1	chr4	-	154024066	154024193	1.60892e-05	0.00624311
																																ENSMUSG00000020614	Fam20a	chr11	-	109677153	109677334	1.68463e-05	0.00649528
																																ENSMUSG00000040268	Plekha1	chr7	+	130909587	130909628	1.74197e-05	0.00663186
																																ENSMUSG00000024044	Epb41l3	chr17	+	69274703	69274895	1.73657e-05	0.00663186
																																ENSMUSG00000027829	Ccnl1	chr3	-	65952705	65952859	1.75727e-05	0.00664829
																																ENSMUSG00000064181	Rab3ip	chr10	-	116928188	116928284	1.78215e-05	0.00665918
																																ENSMUSG00000040690	Col16a1	chr4	+	130081434	130081521	1.77438e-05	0.00665918
																																ENSMUSG00000108815	Gm49388	chr7	+	127801460	127801616	1.86474e-05	0.0068077
																																ENSMUSG00000028262	Clca3a2	chr3	-	144816701	144816810	1.85242e-05	0.0068077
																																ENSMUSG00000048874	Phf3	chr1	-	30837104	30837266	1.85479e-05	0.0068077
																																ENSMUSG00000032966	Fkbp1a	chr2	+	151544012	151544140	1.86688e-05	0.0068077
																																ENSMUSG00000018565	Elp5	chr11	-	69969492	69969588	1.88561e-05	0.00683485
																																ENSMUSG00000014426	Map3k4	chr17	-	12242649	12242805	1.96308e-05	0.00707328
																																ENSMUSG00000037326	Capn15	chr17	-	25964026	25965527	2.04931e-05	0.00729711
																																ENSMUSG00000035245	Eogt	chr6	-	97116000	97116062	2.04609e-05	0.00729711
																																ENSMUSG00000000884	Gnb1l	chr16	+	18552366	18552582	2.07673e-05	0.0073515
																																ENSMUSG00000039988	Ankrd13c	chr3	+	157972999	157973045	2.14267e-05	0.00754082
																																ENSMUSG00000057177	Gsk3a	chr7	-	25231634	25231741	2.16101e-05	0.00756142
																																ENSMUSG00000021366	Hivep1	chr13	+	42169240	42169309	2.20206e-05	0.00766077
																																ENSMUSG00000068551	Zfp467	chr6	-	48442835	48442902	2.22651e-05	0.00770155
																																ENSMUSG00000025437	Usp33	chr3	+	152384115	152384224	2.25352e-05	0.00773492
																																ENSMUSG00000027193	Api5	chr2	-	94428045	94428139	2.26171e-05	0.00773492
																																ENSMUSG00000021969	Zdhhc20	chr14	-	57839550	57839595	2.29191e-05	0.00779416
																																ENSMUSG00000027610	Gss	chr2	-	155566802	155567887	2.45479e-05	0.00830143
																																ENSMUSG00000041115	Iqsec2	chrX	+	152180996	152181092	2.47538e-05	0.00832457
																																ENSMUSG00000020087	Tysnd1	chr10	+	61698297	61698428	2.50134e-05	0.00836539
																																ENSMUSG00000017692	Rhbdl3	chr11	+	80331794	80331907	2.57748e-05	0.00857266
																																ENSMUSG00000038371	Sbf2	chr7	-	110462855	110462966	2.65132e-05	0.00874844
																																ENSMUSG00000030846	Tial1	chr7	-	128444041	128444100	2.65923e-05	0.00874844
																																ENSMUSG00000063952	Brpf3	chr17	+	28831313	28831411	2.70544e-05	0.00885235
																																ENSMUSG00000028886	Eya3	chr4	+	132680755	132680893	2.77604e-05	0.00898109
																																ENSMUSG00000036391	Sec24a	chr11	-	51707127	51707303	2.76613e-05	0.00898109
																																ENSMUSG00000074406	Zfp628	chr7	+	4917409	4917516	2.78979e-05	0.00898109
																																ENSMUSG00000020385	Clk4	chr11	+	51270536	51270595	2.80413e-05	0.00898109
																																ENSMUSG00000038260	Trpm4	chr7	-	45308243	45308421	2.85547e-05	0.00909737
																																ENSMUSG00000030800	Prss8	chr7	-	127927914	127927971	2.884e-05	0.00914017
																																ENSMUSG00000033799	Fam208b	chr13	-	3568751	3568857	2.90499e-05	0.00915875
																																ENSMUSG00000029163	Emilin1	chr5	+	30915516	30915737	2.9349e-05	0.0092051
																																ENSMUSG00000028364	Tnc	chr4	-	63999912	64000185	2.96648e-05	0.00922521
																																ENSMUSG00000026150	Mff	chr1	+	82728066	82728238	2.97179e-05	0.00922521
																																ENSMUSG00000013622	Atraid	chr5	+	31052762	31052884	3.04982e-05	0.00941911
																																ENSMUSG00000031592	Pcm1	chr8	+	41283555	41283746	3.06559e-05	0.00941977
																																ENSMUSG00000036054	Sugp2	chr8	+	70260468	70260589	3.1483e-05	0.00962506
																																ENSMUSG00000019861	Gopc	chr10	-	52357341	52357365	3.24204e-05	0.00986183
																																ENSMUSG00000026240	Cops7b	chr1	+	86596750	86596839	3.30678e-05	0.00995868
																																ENSMUSG00000059796	Eif4a1	chr11	-	69670927	69670976	3.29305e-05	0.00995868
																																ENSMUSG00000020230	Prmt2	chr10	-	76226189	76226315	3.39627e-05	0.0101776
																																ENSMUSG00000033066	Gas7	chr11	+	67643280	67643366	3.45473e-05	0.0102512
																																ENSMUSG00000032633	Flcn	chr11	-	59809364	59809485	3.44962e-05	0.0102512
																																ENSMUSG00000011306	Sugp1	chr8	+	70071113	70071259	3.49116e-05	0.0103088
																																ENSMUSG00000018411	Mapt	chr11	+	104305211	104305409	3.58274e-05	0.0105279
																																ENSMUSG00000008167	Fbxw9	chr8	+	85062171	85062300	3.63762e-05	0.0106375
																																ENSMUSG00000002279	Lmf1	chr17	+	25588675	25588686	3.86655e-05	0.0111361
																																ENSMUSG00000040690	Col16a1	chr4	+	130081434	130081479	3.84969e-05	0.0111361
																																ENSMUSG00000041132	N4bp2l1	chr5	-	150576249	150576338	3.88181e-05	0.0111361
																																ENSMUSG00000032212	Sltm	chr9	+	70562813	70562861	3.83467e-05	0.0111361
																																ENSMUSG00000000439	Mkrn2	chr6	+	115611634	115611939	3.90012e-05	0.0111361
																																ENSMUSG00000030688	Stard10	chr7	+	101345634	101345687	3.94608e-05	0.0112144
																																ENSMUSG00000024924	Vldlr	chr19	+	27239844	27239970	4.0366e-05	0.0114181
																																ENSMUSG00000022332	Khdrbs3	chr15	+	69092900	69094516	4.08702e-05	0.011507
																																ENSMUSG00000024561	Mbd1	chr18	+	74273208	74273323	4.14565e-05	0.011618
																																ENSMUSG00000021327	Zkscan3	chr13	-	21393434	21393574	4.26998e-05	0.0119113
																																ENSMUSG00000040407	Akap9	chr5	+	4004802	4004943	4.3201e-05	0.0119958
																																ENSMUSG00000022995	Enah	chr1	-	181921657	181921768	4.41584e-05	0.0121555
																																ENSMUSG00000070047	Fat1	chr8	+	45042208	45042319	4.41778e-05	0.0121555
																																ENSMUSG00000038949	Cnst	chr1	+	179622766	179622902	4.47545e-05	0.0122585
																																ENSMUSG00000030231	Plekha5	chr6	+	140537005	140537023	4.60259e-05	0.012476
																																ENSMUSG00000059208	Hnrnpm	chr17	-	33670080	33670133	4.58348e-05	0.012476
																																ENSMUSG00000021010	Npas3	chr12	+	53947162	53947337	4.62764e-05	0.012476
																																ENSMUSG00000021764	Ndufs4	chr13	-	114307816	114307890	4.63731e-05	0.012476
																																ENSMUSG00000056770	Setd3	chr12	-	108167272	108167395	4.69659e-05	0.0125796
																																ENSMUSG00000020566	Atp6v1c2	chr12	-	17288995	17289133	4.76454e-05	0.0127054
																																ENSMUSG00000021253	Tgfb3	chr12	-	86063820	86063928	4.79096e-05	0.0127198
																																ENSMUSG00000062115	Rai1	chr11	+	60185095	60190622	5.00379e-05	0.0131195
																																ENSMUSG00000040964	Arhgef10l	chr4	-	140551795	140551920	5.00573e-05	0.0131195
																																ENSMUSG00000078350	Smim1	chr4	-	154024066	154024350	5.00653e-05	0.0131195
																																ENSMUSG00000025006	Sorbs1	chr19	-	40340684	40340750	5.03338e-05	0.013133
																																ENSMUSG00000060002	Chpt1	chr10	-	88480814	88480946	5.08732e-05	0.0132085
																																ENSMUSG00000039208	Metrnl	chr11	+	121707729	121708115	5.10595e-05	0.0132085
																																ENSMUSG00000020776	Fbf1	chr11	-	116157291	116157498	5.23438e-05	0.0134831
																																ENSMUSG00000031750	Il34	chr8	-	110746817	110746935	5.26411e-05	0.0135022
																																ENSMUSG00000029055	Plch2	chr4	-	154985365	154987016	5.42252e-05	0.0138499
																																ENSMUSG00000020521	Rnft1	chr11	+	86486655	86486732	5.55644e-05	0.0140731
																																ENSMUSG00000049321	Zfp2	chr11	-	50910749	50910895	5.54378e-05	0.0140731
																																ENSMUSG00000029769	Ccdc136	chr6	+	29414785	29414980	5.58453e-05	0.0140853
																																ENSMUSG00000024044	Epb41l3	chr17	+	69287611	69287728	5.6208e-05	0.014118
																																ENSMUSG00000049739	Zfp646	chr7	+	127877902	127878107	5.77355e-05	0.0144418
																																ENSMUSG00000043183	Simc1	chr13	+	54528303	54528536	5.96449e-05	0.0147971
																																ENSMUSG00000060594	Layn	chr9	-	51076321	51076345	5.95342e-05	0.0147971
																																ENSMUSG00000038188	Scarf1	chr11	+	75523990	75524137	6.06235e-05	0.0149785
																																ENSMUSG00000020064	Herc4	chr10	+	63286016	63286141	6.17328e-05	0.015146
																																ENSMUSG00000007833	Aldh16a1	chr7	-	45149663	45149766	6.1802e-05	0.015146
																																ENSMUSG00000090841	Myl6	chr10	-	128493538	128493566	6.25705e-05	0.0151677
																																ENSMUSG00000031684	Slc10a7	chr8	+	78706874	78706948	6.32716e-05	0.0151677
																																ENSMUSG00000027254	Map1a	chr2	+	121299268	121307372	6.3394e-05	0.0151677
																																ENSMUSG00000020974	Pole2	chr12	-	69204139	69204267	6.28323e-05	0.0151677
																																ENSMUSG00000048000	Gigyf2	chr1	+	87442010	87442165	6.33543e-05	0.0151677
																																ENSMUSG00000038712	Mindy1	chr3	+	95286695	95286872	6.21936e-05	0.0151677
																																ENSMUSG00000029165	Agbl5	chr5	+	30905108	30905155	6.5964e-05	0.0157205
																																ENSMUSG00000027620	Rbm39	chr2	-	156176402	156176457	6.72476e-05	0.0159337
																																ENSMUSG00000032497	Lrrfip2	chr9	+	111170255	111170324	6.73851e-05	0.0159337
																																ENSMUSG00000004798	Ulk2	chr11	-	61783536	61783715	6.86132e-05	0.0161609
																																ENSMUSG00000060373	Hnrnpc	chr14	-	52097321	52098544	7.09776e-05	0.0166531
																																ENSMUSG00000057594	Arl16	chr11	-	120465983	120466099	7.12558e-05	0.0166538
																																ENSMUSG00000028990	Lzic	chr4	+	149485368	149485592	7.31035e-05	0.0170199
																																ENSMUSG00000007833	Aldh16a1	chr7	-	45149300	45149766	7.38389e-05	0.0171252
																																ENSMUSG00000026131	Dst	chr1	+	34177795	34180498	7.49438e-05	0.0172842
																																ENSMUSG00000024792	Zfpl1	chr19	-	6082180	6082327	7.50953e-05	0.0172842
																																ENSMUSG00000057766	Ankrd29	chr18	-	12295878	12295989	7.68947e-05	0.0176313
																																ENSMUSG00000041264	Uspl1	chr5	+	149187707	149187834	7.85792e-05	0.0179303
																																ENSMUSG00000026987	Baz2b	chr2	-	60079281	60079421	7.87912e-05	0.0179303
																																ENSMUSG00000012114	Med15	chr16	-	17683158	17683188	8.07007e-05	0.0182961
																																ENSMUSG00000023495	Pcbp4	chr9	+	106456281	106456443	8.13207e-05	0.0183678
																																ENSMUSG00000022914	Brwd1	chr16	-	96066495	96066594	8.20421e-05	0.0184619
																																ENSMUSG00000022324	Matn2	chr15	+	34402834	34402957	8.3773e-05	0.0187816
																																ENSMUSG00000015126	Tsr3	chr17	+	25240443	25240663	8.58157e-05	0.0191686
																																ENSMUSG00000039701	Usp53	chr3	-	122957584	122957731	8.62713e-05	0.0191995
																																ENSMUSG00000021619	Atg10	chr13	-	91040849	91040988	8.77845e-05	0.0194647
																																ENSMUSG00000102976	Zc3h11a	chr1	-	133653972	133654438	8.96593e-05	0.0198078
																																ENSMUSG00000035949	Fbxw2	chr2	-	34807277	34807447	9.06218e-05	0.0199477
																																ENSMUSG00000024436	Mrps18b	chr17	-	35912337	35912404	9.22064e-05	0.0202229
																																ENSMUSG00000020707	Rnf135	chr11	+	80193885	80194048	9.27618e-05	0.0202713
																																ENSMUSG00000014633	Cmc2	chr8	-	116911083	116911234	9.40695e-05	0.0204831
																																ENSMUSG00000063511	Snrnp70	chr7	-	45381824	45383184	9.51012e-05	0.0206335
																																ENSMUSG00000017400	Stac2	chr11	-	98039618	98039756	9.5865e-05	0.020725
																																ENSMUSG00000014444	Piezo1	chr8	-	122506265	122506308	9.82762e-05	0.0211706
																																ENSMUSG00000051403	Ppp1r37	chr7	-	19537369	19537467	9.88958e-05	0.0212286
																																ENSMUSG00000019891	Dcbld1	chr10	+	52304586	52304720	9.99364e-05	0.0213761
																																ENSMUSG00000002688	Prkd1	chr12	-	50392834	50393039	0.000101374	0.0216074
																																ENSMUSG00000097290	1300002E11Rik	chr16	+	21801280	21801356	0.000103197	0.021842
																																ENSMUSG00000020974	Pole2	chr12	-	69204090	69204267	0.000102885	0.021842
																																ENSMUSG00000030199	Etv6	chr6	+	134066306	134066465	0.000104814	0.0220302
																																ENSMUSG00000021133	Susd6	chr12	+	80851213	80851276	0.00010471	0.0220302
																																ENSMUSG00000036054	Sugp2	chr8	+	70261230	70261317	0.000105318	0.0220596
																																ENSMUSG00000021276	Cinp	chr12	-	110877222	110877372	0.000106189	0.0221652
																																ENSMUSG00000022620	Arsa	chr15	-	89475121	89475362	0.000107443	0.02235
																																ENSMUSG00000025224	Gbf1	chr19	+	46254556	46254617	0.000109091	0.0225378
																																ENSMUSG00000036022	Fam122b	chrX	-	53253853	53253928	0.000108976	0.0225378
																																ENSMUSG00000022771	Ppil2	chr16	-	17092214	17092304	0.00011048	0.0227472
																																ENSMUSG00000026743	Mllt10	chr2	+	18109781	18109891	0.000111417	0.0228623
																																ENSMUSG00000053175	Bcl3	chr7	-	19820046	19820200	0.00011332	0.0229597
																																ENSMUSG00000047181	Samd14	chr11	+	95019360	95019527	0.000113409	0.0229597
																																ENSMUSG00000032336	Nptn	chr9	+	58651858	58652009	0.000112889	0.0229597
																																ENSMUSG00000028082	Sh3d19	chr3	+	86113105	86113178	0.000112927	0.0229597
																																ENSMUSG00000066406	Akap13	chr7	+	75683393	75683459	0.000115328	0.0232705
																																ENSMUSG00000049553	Polr1a	chr6	+	71949339	71949523	0.000116174	0.0233633
																																ENSMUSG00000030170	Wnt5b	chr6	-	119446334	119446582	0.000117271	0.0235058
																																ENSMUSG00000027333	Smox	chr2	+	131522058	131522219	0.000118477	0.0236692
																																ENSMUSG00000037791	Phf12	chr11	+	77984015	77984197	0.000120012	0.0238187
																																ENSMUSG00000021693	Kif2a	chr13	-	106974494	106974562	0.00011977	0.0238187
																																ENSMUSG00000113204	Gm46430	chr13	-	74611263	74611321	0.000121132	0.0239623
																																ENSMUSG00000026923	Notch1	chr2	-	26478606	26478720	0.000122756	0.0242044
																																ENSMUSG00000043531	Sorcs1	chr19	-	50152759	50152920	0.000123399	0.0242522
																																ENSMUSG00000061950	Ppp4r1	chr17	+	65829870	65829990	0.000124956	0.0244788
																																ENSMUSG00000071350	Setdb2	chr14	-	59437436	59437765	0.000125631	0.0245317
																																ENSMUSG00000021493	Pdlim7	chr13	-	55507863	55507880	0.000126574	0.0246054
																																ENSMUSG00000035673	Sbno2	chr10	-	80079952	80081382	0.000126821	0.0246054
																																ENSMUSG00000001472	Tcf25	chr8	+	123399264	123399344	0.000129724	0.0250881
																																ENSMUSG00000074272	Ceacam1	chr7	-	25464848	25464880	0.000132562	0.0254163
																																ENSMUSG00000070699	Sars2	chr7	+	28747486	28747550	0.00013268	0.0254163
																																ENSMUSG00000023973	Cnpy3	chr17	-	46747420	46747544	0.000132079	0.0254163
																																ENSMUSG00000025227	Mfsd13a	chr19	+	46371935	46372107	0.000137632	0.0262463
																																ENSMUSG00000049878	Rlf	chr4	-	121188214	121188296	0.000137881	0.0262463
																																ENSMUSG00000023051	Tarbp2	chr15	+	102522848	102523050	0.000138378	0.0262585
																																ENSMUSG00000011658	Fuz	chr7	+	44898502	44898700	0.000139038	0.0263012
																																ENSMUSG00000039242	B3galnt2	chr13	+	13975437	13975634	0.000139794	0.0263619
																																ENSMUSG00000018411	Mapt	chr11	+	104305312	104305409	0.000141104	0.0265263
																																ENSMUSG00000025265	Fgd1	chrX	+	151087967	151088111	0.000143263	0.0268487
																																ENSMUSG00000024483	Ankhd1	chr18	+	36581067	36581215	0.000146233	0.0273207
																																ENSMUSG00000020834	Dhrs13	chr11	+	78034274	78034586	0.000148533	0.027665
																																ENSMUSG00000022391	Rangap1	chr15	-	81716566	81716701	0.000151581	0.0279745
																																ENSMUSG00000027217	Tspan18	chr2	-	93220018	93220213	0.000151219	0.0279745
																																ENSMUSG00000000759	Tubgcp3	chr8	-	12658299	12658377	0.000151005	0.0279745
																																ENSMUSG00000074796	Slc4a11	chr2	-	130696647	130696755	0.000152658	0.0280877
																																ENSMUSG00000062822	4833420G17Rik	chr13	+	119464564	119464690	0.000153772	0.0281216
																																ENSMUSG00000026883	Dab2ip	chr2	+	35661491	35661625	0.000153447	0.0281216
																																ENSMUSG00000012076	Brms1l	chr12	+	55863133	55863173	0.000156321	0.0285018
																																ENSMUSG00000024566	Atp9b	chr18	-	80891814	80891923	0.00015777	0.0286796
																																ENSMUSG00000021037	Ahsa1	chr12	+	87273122	87273224	0.000158483	0.0287228
																																ENSMUSG00000021196	Pfkp	chr13	-	6597858	6598011	0.00015979	0.0287775
																																ENSMUSG00000030605	Mfge8	chr7	-	79143277	79143388	0.00016111	0.0287775
																																ENSMUSG00000071074	Yipf3	chr17	+	46251113	46251227	0.000160706	0.0287775
																																ENSMUSG00000058886	Deaf1	chr7	-	141324081	141324179	0.000159671	0.0287775
																																ENSMUSG00000032497	Lrrfip2	chr9	+	111193046	111193118	0.000161161	0.0287775
																																ENSMUSG00000017723	Wfdc2	chr2	+	164564056	164564212	0.000162392	0.0288272
																																ENSMUSG00000036093	Arl5a	chr2	-	52416063	52416211	0.000161958	0.0288272
																																ENSMUSG00000001156	Mxd1	chr6	-	86658068	86658133	0.000163823	0.0289116
																																ENSMUSG00000063884	Ptcd3	chr6	-	71892468	71892519	0.000163735	0.0289116
																																ENSMUSG00000002608	Ccdc97	chr7	-	25716853	25716999	0.000166897	0.0293685
																																ENSMUSG00000057880	Abat	chr16	+	8611126	8611294	0.000168689	0.0295977
																																ENSMUSG00000026662	Sephs1	chr2	+	4889182	4889286	0.00017032	0.0297976
																																ENSMUSG00000020454	Eif4enif1	chr11	+	3239400	3239485	0.000171004	0.0298311
																																ENSMUSG00000071074	Yipf3	chr17	+	46251363	46251487	0.000171574	0.0298445
																																ENSMUSG00000027750	Postn	chr3	+	54380411	54380492	0.000172812	0.0299737
																																ENSMUSG00000031982	Arv1	chr8	+	124730791	124731016	0.000173937	0.0300826
																																ENSMUSG00000010608	Rbm25	chr12	+	83651645	83651750	0.000177276	0.0303136
																																ENSMUSG00000029152	Ociad1	chr5	+	73310273	73310426	0.000177095	0.0303136
																																ENSMUSG00000027763	Mbnl1	chr3	+	60614682	60614736	0.000176628	0.0303136
																																ENSMUSG00000070371	Prss36	chr7	-	127933566	127933832	0.000176347	0.0303136
																																ENSMUSG00000025026	Add3	chr19	+	53244309	53244405	0.000177939	0.0303386
																																ENSMUSG00000064289	Tank	chr2	+	61613650	61613715	0.000178424	0.0303386
																																ENSMUSG00000031982	Arv1	chr8	+	124730838	124731016	0.000179362	0.0304126
																																ENSMUSG00000018920	Cxcl16	chr11	-	70456940	70456991	0.00018154	0.0306959
																																ENSMUSG00000056268	Dennd1b	chr1	+	139059066	139059126	0.000185495	0.0312585
																																ENSMUSG00000033610	Pank1	chr19	-	34821712	34821889	0.000185899	0.0312585
																																ENSMUSG00000032548	Slco2a1	chr9	+	103085758	103085953	0.000187693	0.0312992
																																ENSMUSG00000032294	Pkm	chr9	+	59675567	59675734	0.000186793	0.0312992
																																ENSMUSG00000004631	Sgce	chr6	-	4690468	4690495	0.000187661	0.0312992
																																ENSMUSG00000048874	Phf3	chr1	-	30829842	30831559	0.000189377	0.0314934
																																ENSMUSG00000028108	Ecm1	chr3	-	95738011	95738113	0.000189974	0.0315061
																																ENSMUSG00000071074	Yipf3	chr17	+	46251113	46251487	0.000198229	0.0327853
																																ENSMUSG00000046223	Plaur	chr7	+	24474209	24474356	0.000199569	0.032917
																																ENSMUSG00000046314	Stxbp6	chr12	-	45019466	45019655	0.000202473	0.0330358
																																ENSMUSG00000027646	Src	chr2	+	157458842	157458860	0.000201373	0.0330358
																																ENSMUSG00000057531	Dtnbp1	chr13	-	44982740	44982873	0.000201492	0.0330358
																																ENSMUSG00000027222	Pex16	chr2	+	92377429	92377563	0.000202319	0.0330358
																																ENSMUSG00000035958	Tdp2	chr13	+	24836015	24836186	0.000203399	0.0330978
																																ENSMUSG00000022607	Ptk2	chr15	-	73221806	73221869	0.000204611	0.0332056
																																ENSMUSG00000029999	Tgfa	chr6	+	86269929	86270079	0.000205535	0.0332665
																																ENSMUSG00000014791	Elmo3	chr8	+	105307801	105307933	0.000207272	0.0333771
																																ENSMUSG00000035671	Zswim4	chr8	-	84217244	84217408	0.000207321	0.0333771
																																ENSMUSG00000051412	Vamp7	chrGL456233.1	-	14074	14167	0.000209726	0.0334089
																																ENSMUSG00000042197	Zfp451	chr1	-	33776268	33777863	0.000208587	0.0334089
																																ENSMUSG00000034252	Senp6	chr9	+	80113726	80114114	0.000208758	0.0334089
																																ENSMUSG00000052488	Cherp	chr8	-	72468374	72468486	0.000209367	0.0334089
																																ENSMUSG00000108815	Gm49388	chr7	+	127801833	127801942	0.000211272	0.0335668
																																ENSMUSG00000034647	Ankrd12	chr17	-	66052953	66053091	0.000212401	0.0336577
																																ENSMUSG00000017723	Wfdc2	chr2	+	164563307	164563451	0.000214829	0.0338653
																																ENSMUSG00000030199	Etv6	chr6	+	134263018	134263119	0.000214421	0.0338653
																																ENSMUSG00000033713	Foxn3	chr12	-	99219600	99219663	0.000220616	0.0345973
																																ENSMUSG00000025932	Eya1	chr1	-	14302769	14302897	0.000220427	0.0345973
																																ENSMUSG00000025869	Nop16	chr13	-	54588597	54588667	0.000221664	0.0346718
																																ENSMUSG00000027879	Sec22b	chr3	+	97912578	97912739	0.000222407	0.0346984
																																ENSMUSG00000028862	Map3k6	chr4	+	133249929	133250122	0.000224336	0.0349094
																																ENSMUSG00000025747	Tyms	chr5	-	30068465	30068640	0.000225087	0.0349363
																																ENSMUSG00000057193	Slc44a2	chr9	+	21353000	21353172	0.000225848	0.0349648
																																ENSMUSG00000023951	Vegfa	chr17	-	46020990	46021122	0.000230791	0.035639
																																ENSMUSG00000025959	Klf7	chr1	-	64042313	64042437	0.000232429	0.0357266
																																ENSMUSG00000034430	Zxdc	chr6	+	90378783	90378954	0.000232539	0.0357266
																																ENSMUSG00000071266	Zfp946	chr17	+	22428480	22428565	0.000233577	0.0357953
																																ENSMUSG00000016481	Cr1l	chr1	-	195106817	195106922	0.000238852	0.0365111
																																ENSMUSG00000028811	Yars	chr4	+	129200725	129200855	0.000240767	0.0367112
																																ENSMUSG00000037204	Atg101	chr15	+	101286932	101287250	0.000244452	0.0371794
																																ENSMUSG00000028545	Bend5	chr4	+	111431016	111431150	0.000247955	0.0375237
																																ENSMUSG00000030314	Atg7	chr6	+	114672790	114672843	0.000247808	0.0375237
																																ENSMUSG00000022515	Anks3	chr16	-	4957967	4958166	0.000249886	0.0377215
																																ENSMUSG00000019088	Dnase1l1	chrX	-	74276645	74276734	0.000251606	0.0378868
																																ENSMUSG00000033530	Ttc7b	chr12	-	100419491	100419570	0.000253425	0.0380659
																																ENSMUSG00000029647	Pan3	chr5	+	147488110	147488258	0.000254196	0.0380873
																																ENSMUSG00000022386	Trmu	chr15	+	85894925	85895026	0.000255434	0.0381782
																																ENSMUSG00000009621	Vav2	chr2	-	27268150	27268237	0.000256263	0.0382078
																																ENSMUSG00000064289	Tank	chr2	+	61613650	61613798	0.000257359	0.0382769
																																ENSMUSG00000026159	Agfg1	chr1	+	82880007	82880127	0.000260171	0.0383185
																																ENSMUSG00000022841	Ap2m1	chr16	+	20540807	20540813	0.000259144	0.0383185
																																ENSMUSG00000028455	Stoml2	chr4	-	43030435	43030535	0.000260123	0.0383185
																																ENSMUSG00000037902	Sirpa	chr2	+	129608132	129608233	0.000258663	0.0383185
																																ENSMUSG00000056069	Fam105a	chr15	-	27662338	27662488	0.000260878	0.0383295
																																ENSMUSG00000032777	Gtf3c1	chr7	-	125662576	125662655	0.000264866	0.0388211
																																ENSMUSG00000025234	Arih1	chr9	-	59414769	59414836	0.000266455	0.0388658
																																ENSMUSG00000031068	Glrx3	chr7	+	137452452	137452541	0.000266328	0.0388658
																																ENSMUSG00000027263	Tubgcp4	chr2	+	121175770	121175824	0.000269822	0.0392251
																																ENSMUSG00000040782	Cop1	chr1	+	159244799	159244840	0.000270214	0.0392251
																																ENSMUSG00000026867	Gapvd1	chr2	-	34699825	34699906	0.000271696	0.0393458
																																ENSMUSG00000076435	Acsf2	chr11	-	94570302	94570460	0.000273228	0.0394733
																																ENSMUSG00000027333	Smox	chr2	+	131520411	131521171	0.000274349	0.0395409
																																ENSMUSG00000019088	Dnase1l1	chrX	-	74276478	74276556	0.000275807	0.0396566
																																ENSMUSG00000032615	Nt5m	chr11	+	59860749	59860810	0.000281824	0.0404258
																																ENSMUSG00000045103	Dmd	chrX	+	85144910	85144949	0.000286601	0.0410137
																																ENSMUSG00000090394	4930523C07Rik	chr1	+	160070122	160070232	0.000288568	0.0411273
																																ENSMUSG00000031075	Ano1	chr7	-	144648574	144648640	0.000289432	0.0411273
																																ENSMUSG00000030847	Bag3	chr7	+	128541806	128542208	0.000289138	0.0411273
																																ENSMUSG00000040407	Akap9	chr5	+	3954396	3954450	0.000290181	0.0411371
																																ENSMUSG00000072946	Ptgr2	chr12	+	84296227	84296356	0.000293745	0.041545
																																ENSMUSG00000023942	Slc29a1	chr17	-	45593331	45593432	0.000294994	0.0416245
																																ENSMUSG00000035293	G2e3	chr12	+	51363185	51363310	0.000301358	0.0423251
																																ENSMUSG00000025747	Tyms	chr5	-	30068465	30068538	0.000301261	0.0423251
																																ENSMUSG00000028841	Cnksr1	chr4	-	134233701	134233764	0.000303256	0.0424013
																																ENSMUSG00000037197	Rbm17	chr2	-	11587720	11587794	0.000303302	0.0424013
																																ENSMUSG00000032478	Nme6	chr9	+	109835269	109835414	0.000306701	0.0427777
																																ENSMUSG00000025332	Kdm5c	chrX	+	152269714	152269853	0.000310845	0.0428534
																																ENSMUSG00000024236	Svil	chr18	+	5055979	5056849	0.000309191	0.0428534
																																ENSMUSG00000055485	Soga1	chr2	-	157037169	157037310	0.000310137	0.0428534
																																ENSMUSG00000029328	Hnrnpdl	chr5	-	100036480	100036651	0.000311491	0.0428534
																																ENSMUSG00000030314	Atg7	chr6	+	114672790	114672843	0.000309857	0.0428534
																																ENSMUSG00000022378	Fam49b	chr15	-	63956599	63956682	0.000308743	0.0428534
																																ENSMUSG00000061887	Ssbp3	chr4	+	107046315	107046394	0.000312939	0.0428628
																																ENSMUSG00000024260	Sap130	chr18	+	31650490	31650615	0.000312976	0.0428628
																																ENSMUSG00000032217	Rnf111	chr9	-	70502939	70503002	0.000315711	0.042946
																																ENSMUSG00000040010	Slc7a5	chr8	-	121885908	121886005	0.000314312	0.042946
																																ENSMUSG00000024187	Fam234a	chr17	-	26218634	26218751	0.000315021	0.042946
																																ENSMUSG00000023952	Gtpbp2	chr17	+	46163033	46163213	0.000321166	0.04359
																																ENSMUSG00000022203	Efs	chr14	-	54920902	54921014	0.000322212	0.0435963
																																ENSMUSG00000053470	Kdm3a	chr6	-	71616817	71616870	0.000322653	0.0435963
																																ENSMUSG00000028878	Fam76a	chr4	-	132910691	132910778	0.000327324	0.044129
																																ENSMUSG00000028920	Fbxo42	chr4	+	141195180	141195291	0.000330056	0.0443985
																																ENSMUSG00000031634	Ufsp2	chr8	+	45994014	45994091	0.000333669	0.0446858
																																ENSMUSG00000024778	Fas	chr19	+	34318589	34318651	0.000333002	0.0446858
																																ENSMUSG00000011148	Adssl1	chr12	+	112636393	112636518	0.000334556	0.0447057
																																ENSMUSG00000029999	Tgfa	chr6	+	86271379	86271489	0.000335295	0.0447058
																																ENSMUSG00000047613	A430005L14Rik	chr4	+	153959755	153959862	0.000336154	0.0447218
																																ENSMUSG00000047613	A430005L14Rik	chr4	+	153959748	153959862	0.000339422	0.0450575
																																ENSMUSG00000020993	Trappc6b	chr12	-	59059255	59059511	0.000341143	0.0451869
																																ENSMUSG00000028064	Sema4a	chr3	-	88440697	88440878	0.000347545	0.0458594
																																ENSMUSG00000111497	Gm38431	chr9	-	21073074	21073181	0.000347736	0.0458594
																																ENSMUSG00000022199	Slc22a17	chr14	-	54912048	54912152	0.000354603	0.0466634
																																ENSMUSG00000028672	Hmgcl	chr4	+	135958722	135958786	0.000358592	0.0468826
																																ENSMUSG00000027716	Trpc3	chr3	-	36634374	36634458	0.000358086	0.0468826
																																ENSMUSG00000021420	Fars2	chr13	+	36148360	36148444	0.000357771	0.0468826
																																ENSMUSG00000003762	Coq8b	chr7	+	27243302	27243396	0.000362812	0.0470281
																																ENSMUSG00000028641	P3h1	chr4	+	119236773	119236966	0.000362631	0.0470281
																																ENSMUSG00000036104	Rab3gap1	chr1	+	127901578	127901698	0.000360859	0.0470281
																																ENSMUSG00000068758	Il3ra	chr14	+	14348820	14348944	0.000362497	0.0470281
																																ENSMUSG00000038671	Arfrp1	chr2	-	181364310	181364398	0.00037126	0.0480202
																																ENSMUSG00000021235	Coq6	chr12	+	84368142	84368709	0.000372917	0.0481318
																																ENSMUSG00000059119	Nap1l4	chr7	-	143534285	143534417	0.000375653	0.0483817
																																ENSMUSG00000017692	Rhbdl3	chr11	+	80302663	80302687	0.000379925	0.0487739
																																ENSMUSG00000020451	Limk2	chr11	-	3347573	3347748	0.00038031	0.0487739
																																ENSMUSG00000024576	Csnk1a1	chr18	+	61571873	61571957	0.000393804	0.0503978
																																ENSMUSG00000068551	Zfp467	chr6	-	48443411	48443487	0.000395459	0.0505027
																																ENSMUSG00000022203	Efs	chr14	-	54920902	54921181	0.000404292	0.0515221
																																ENSMUSG00000053477	Tcf4	chr18	+	69347278	69347370	0.00040596	0.051626
																																ENSMUSG00000063160	Numbl	chr7	+	27261007	27261107	0.000406864	0.0516325
																																ENSMUSG00000028911	Srsf4	chr4	+	131884275	131884482	0.000408996	0.0517945
																																ENSMUSG00000024908	Ppp6r3	chr19	-	3518244	3518382	0.000413008	0.0520434
																																ENSMUSG00000010205	Raver1	chr9	-	21080974	21081104	0.000413541	0.0520434
																																ENSMUSG00000029055	Plch2	chr4	-	155000447	155000651	0.000413195	0.0520434
																																ENSMUSG00000024845	Tmem134	chr19	+	4127759	4127836	0.000416212	0.0522709
																																ENSMUSG00000020728	Cep112	chr11	+	108519895	108519988	0.000419564	0.0525113
																																ENSMUSG00000018899	Irf1	chr11	+	53771283	53771375	0.000419861	0.0525113
																																ENSMUSG00000021065	Fut8	chr12	+	77323844	77323937	0.000428439	0.0534736
																																ENSMUSG00000023973	Cnpy3	chr17	-	46743185	46743282	0.000431617	0.0537594
																																ENSMUSG00000038762	Abcf1	chr17	-	35968967	35969233	0.00043319	0.0538445
																																ENSMUSG00000011658	Fuz	chr7	+	44898515	44898700	0.000437863	0.0542028
																																ENSMUSG00000004791	Pgf	chr12	-	85175755	85175795	0.000437844	0.0542028
																																ENSMUSG00000102976	Zc3h11a	chr1	-	133653972	133654032	0.000443541	0.0547936
																																ENSMUSG00000058056	Palld	chr8	-	61534857	61534908	0.000453917	0.0559535
																																ENSMUSG00000024505	Dtwd2	chr18	-	49724112	49724207	0.000454779	0.0559535
																																ENSMUSG00000050812	AI314180	chr4	-	58807750	58807889	0.000456303	0.0560271
																																ENSMUSG00000028809	Srrm1	chr4	-	135342369	135342573	0.000457661	0.0560802
																																ENSMUSG00000020782	Llgl2	chr11	+	115854811	115854859	0.00046503	0.0568681
																																ENSMUSG00000041477	Dcp1b	chr6	+	119214769	119217979	0.000467514	0.0570565
																																ENSMUSG00000045411	2410002F23Rik	chr7	+	44247237	44247416	0.000468499	0.0570617
																																ENSMUSG00000032280	Tle3	chr9	+	61373952	61374053	0.000470635	0.0571162
																																ENSMUSG00000027381	Bcl2l11	chr2	+	128128924	128129014	0.000470834	0.0571162
																																ENSMUSG00000020312	Shc2	chr10	-	79623826	79623991	0.000474356	0.0574284
																																ENSMUSG00000008167	Fbxw9	chr8	+	85064383	85064672	0.000477459	0.0576887
																																ENSMUSG00000033530	Ttc7b	chr12	-	100384146	100384264	0.000486609	0.0586771
																																ENSMUSG00000024853	Sf3b2	chr19	-	5287909	5288006	0.000490384	0.0588977
																																ENSMUSG00000027309	4930402H24Rik	chr2	-	130710811	130710877	0.000490028	0.0588977
																																ENSMUSG00000058444	Map2k5	chr9	-	63194201	63194247	0.000492701	0.058942
																																ENSMUSG00000036180	Gatad2a	chr8	-	69950652	69950754	0.000492179	0.058942
																																ENSMUSG00000027879	Sec22b	chr3	+	97907224	97907330	0.00049612	0.0592339
																																ENSMUSG00000026796	Fam129b	chr2	+	32909848	32909977	0.000498644	0.0594182
																																ENSMUSG00000021115	Vrk1	chr12	+	106071569	106071641	0.000501412	0.0596306
																																ENSMUSG00000070699	Sars2	chr7	+	28744560	28744719	0.000503123	0.0596317
																																ENSMUSG00000041477	Dcp1b	chr6	+	119217802	119217979	0.000503391	0.0596317
																																ENSMUSG00000020309	Chac2	chr11	-	30979564	30979600	0.00051148	0.0604125
																																ENSMUSG00000102976	Zc3h11a	chr1	-	133660575	133660621	0.000511979	0.0604125
																																ENSMUSG00000025875	Tspan17	chr13	+	54795965	54796082	0.000513736	0.0605019
																																ENSMUSG00000059119	Nap1l4	chr7	-	143546128	143546180	0.000516733	0.0607367
																																ENSMUSG00000029470	P2rx4	chr5	+	122714398	122714546	0.000519174	0.0609054
																																ENSMUSG00000024587	Nars	chr18	-	64504337	64504473	0.000521475	0.061024
																																ENSMUSG00000026970	Rbms1	chr2	-	60759758	60759806	0.000522202	0.061024
																																ENSMUSG00000042354	Gnl3	chr14	-	31017807	31017866	0.000526712	0.0614325
																																ENSMUSG00000058392	Rrp1b	chr17	+	32048552	32048638	0.000536249	0.0619764
																																ENSMUSG00000000631	Myo18a	chr11	+	77821529	77821550	0.000533735	0.0619764
																																ENSMUSG00000026404	Ddx59	chr1	+	136434505	136434634	0.000534392	0.0619764
																																ENSMUSG00000033216	Eefsec	chr6	-	88281548	88281705	0.000535839	0.0619764
																																ENSMUSG00000024143	Rhoq	chr17	+	86964299	86964358	0.000537518	0.0619764
																																ENSMUSG00000000148	Brat1	chr5	+	140717143	140717319	0.000537299	0.0619764
																																ENSMUSG00000028826	Tmem57	chr4	-	134836766	134837034	0.000540705	0.062134
																																ENSMUSG00000013701	Timm23	chr14	-	32193402	32193487	0.000540938	0.062134
																																ENSMUSG00000038346	Zfp384	chr6	+	125024504	125024552	0.000543247	0.062281
																																ENSMUSG00000020190	Mknk2	chr10	-	80667612	80667656	0.000546327	0.0625157
																																ENSMUSG00000032582	Rbm6	chr9	-	107861622	107861729	0.00054831	0.0626242
																																ENSMUSG00000001755	Coasy	chr11	+	101082998	101083706	0.000556469	0.0632332
																																ENSMUSG00000056367	Actr3b	chr5	+	25849072	25849156	0.000554963	0.0632332
																																ENSMUSG00000022332	Khdrbs3	chr15	+	69029714	69029910	0.000556775	0.0632332
																																ENSMUSG00000058444	Map2k5	chr9	-	63217338	63217365	0.000561309	0.0636287
																																ENSMUSG00000025239	Limd1	chr9	+	123500130	123500232	0.000565647	0.0640005
																																ENSMUSG00000017478	Zc3h18	chr8	+	122411637	122411703	0.000568393	0.0641913
																																ENSMUSG00000060176	Kif27	chr13	-	58343865	58344824	0.000572497	0.0644144
																																ENSMUSG00000021508	Cxcl14	chr13	-	56292460	56292574	0.000572122	0.0644144
																																ENSMUSG00000041477	Dcp1b	chr6	+	119214769	119215606	0.00057649	0.0647434
																																ENSMUSG00000001665	Gstt3	chr10	-	75775489	75775497	0.000581584	0.0651945
																																ENSMUSG00000029470	P2rx4	chr5	+	122727398	122727464	0.000586319	0.0653621
																																ENSMUSG00000037876	Jmjd1c	chr10	+	67216982	67217107	0.000584851	0.0653621
																																ENSMUSG00000043323	Fbrsl1	chr5	-	110376401	110376470	0.000586224	0.0653621
																																ENSMUSG00000028689	Ccdc163	chr4	+	116714015	116714149	0.000588729	0.0655101
																																ENSMUSG00000054263	Lifr	chr15	+	7130900	7131038	0.000592015	0.0656345
																																ENSMUSG00000031565	Fgfr1	chr8	+	25564339	25564484	0.000591084	0.0656345
																																ENSMUSG00000022558	Mroh1	chr15	+	76451346	76451535	0.000594235	0.0657601
																																ENSMUSG00000027217	Tspan18	chr2	-	93222711	93222784	0.000602007	0.0664988
																																ENSMUSG00000021772	Nkiras1	chr14	+	18277843	18278101	0.000606276	0.0667267
																																ENSMUSG00000020166	Cnot2	chr10	-	116517316	116517383	0.00060605	0.0667267
																																ENSMUSG00000001065	Zfp276	chr8	+	123264994	123265070	0.000607777	0.0667705
																																ENSMUSG00000042719	Naa25	chr5	+	121421290	121421403	0.000613941	0.0673256
																																ENSMUSG00000038644	Pold1	chr7	-	44534384	44534487	0.000616754	0.0675117
																																ENSMUSG00000039976	Tbc1d16	chr11	-	119155081	119155216	0.000626543	0.0684594
																																ENSMUSG00000029055	Plch2	chr4	-	154986214	154987016	0.000629495	0.068658
																																ENSMUSG00000050323	Ndufaf6	chr4	-	11053431	11053488	0.000634716	0.0689979
																																ENSMUSG00000001247	Lsr	chr7	-	30965968	30966088	0.000634891	0.0689979
																																ENSMUSG00000022995	Enah	chr1	-	181921657	181921960	0.000638862	0.0690698
																																ENSMUSG00000021646	Mccc2	chr13	-	99967833	99967933	0.000638975	0.0690698
																																ENSMUSG00000038957	Edc3	chr9	+	57712379	57712475	0.000638648	0.0690698
																																ENSMUSG00000028683	Eif2b3	chr4	+	117081557	117081661	0.000642411	0.0693174
																																ENSMUSG00000029036	Atad3a	chr4	-	155747313	155747481	0.000644021	0.0693675
																																ENSMUSG00000030733	Sh2b1	chr7	-	126469487	126469570	0.000649673	0.069852
																																ENSMUSG00000052917	Senp7	chr16	+	56123778	56123970	0.000653551	0.0701443
																																ENSMUSG00000026737	Pip4k2a	chr2	-	18866111	18866150	0.000656181	0.0701471
																																ENSMUSG00000025283	Sat1	chrX	-	155215120	155215230	0.000656949	0.0701471
																																ENSMUSG00000030083	Abtb1	chr6	-	88839330	88839490	0.000658212	0.0701471
																																ENSMUSG00000009073	Nf2	chr11	-	4806253	4806336	0.000657224	0.0701471
																																ENSMUSG00000020271	Fbxw11	chr11	+	32652747	32652904	0.000660568	0.0702744
																																ENSMUSG00000027075	Slc43a1	chr2	+	84859688	84859830	0.000664821	0.0706029
																																ENSMUSG00000020689	Itgb3	chr11	+	104665465	104665632	0.000670786	0.0711116
																																ENSMUSG00000024190	Dusp1	chr17	-	26507573	26507719	0.000676168	0.0715568
																																ENSMUSG00000079020	Slc45a4	chr15	-	73585287	73585387	0.000680223	0.0718603
																																ENSMUSG00000039069	Mtg2	chr2	+	180078003	180078142	0.000685217	0.0721837
																																ENSMUSG00000025762	Larp1b	chr3	+	40961607	40961788	0.000685669	0.0721837
																																ENSMUSG00000068551	Zfp467	chr6	-	48442835	48442902	0.000693882	0.0729214
																																ENSMUSG00000025156	Gps1	chr11	+	120784646	120784725	0.000695571	0.0729723
																																ENSMUSG00000039834	Zfp335	chr2	-	164901417	164901530	0.000700508	0.0733059
																																ENSMUSG00000040268	Plekha1	chr7	+	130909587	130909658	0.000701173	0.0733059
																																ENSMUSG00000037296	Lsm1	chr8	+	25793676	25793792	0.000710101	0.0741113
																																ENSMUSG00000022607	Ptk2	chr15	-	73211986	73211995	0.000711828	0.0741636
																																ENSMUSG00000062822	4833420G17Rik	chr13	+	119465279	119466304	0.000720395	0.0747987
																																ENSMUSG00000034401	Spata6	chr4	+	111746140	111746278	0.000719189	0.0747987
																																ENSMUSG00000049606	Zfp644	chr5	-	106634830	106635436	0.000727012	0.0750993
																																ENSMUSG00000028649	Macf1	chr4	-	123354478	123354580	0.000726826	0.0750993
																																ENSMUSG00000037190	Cyb561d2	chr9	-	107541496	107541650	0.000725378	0.0750993
																																ENSMUSG00000006517	Mvd	chr8	-	122436473	122436589	0.000730881	0.0752422
																																ENSMUSG00000038965	Ube2l3	chr16	-	17176411	17176507	0.000729809	0.0752422
																																ENSMUSG00000049606	Zfp644	chr5	-	106695136	106695699	0.000740333	0.0760859
																																ENSMUSG00000025162	Csnk1d	chr11	-	120973820	120973969	0.000744855	0.0762915
																																ENSMUSG00000022641	Bbx	chr16	-	50251313	50251394	0.000743824	0.0762915
																																ENSMUSG00000008575	Nfib	chr4	-	82310302	82310391	0.00074802	0.0764863
																																ENSMUSG00000014075	Tctex1d2	chr16	+	32426857	32426921	0.000752898	0.0768553
																																ENSMUSG00000005936	Kctd20	chr17	+	28961413	28961687	0.000756195	0.0770619
																																ENSMUSG00000041189	Chrnb1	chr11	-	69786880	69787104	0.000757791	0.0770947
																																ENSMUSG00000037321	Tap1	chr17	+	34189429	34189560	0.000760557	0.0772463
																																ENSMUSG00000061232	H2-K1	chr17	-	33996615	33996654	0.000767934	0.0774508
																																ENSMUSG00000061887	Ssbp3	chr4	+	107027216	107027297	0.000764896	0.0774508
																																ENSMUSG00000027668	Mfn1	chr3	+	32569487	32569684	0.000768443	0.0774508
																																ENSMUSG00000036564	Ndrg4	chr8	+	95709902	95709954	0.000765682	0.0774508
																																ENSMUSG00000030409	Dmpk	chr7	+	19086892	19087041	0.000770248	0.0774508
																																ENSMUSG00000048772	Tmem53	chr4	+	117265859	117265975	0.000769818	0.0774508
																																ENSMUSG00000027620	Rbm39	chr2	-	156174096	156174168	0.000774095	0.0777086
																																ENSMUSG00000014353	Tmem87b	chr2	+	128839147	128839221	0.000776374	0.0778084
																																ENSMUSG00000032135	Mcam	chr9	+	44140844	44140992	0.000778107	0.0778531
																																ENSMUSG00000020937	Plcd3	chr11	-	103074558	103074709	0.000783058	0.0782192
																																ENSMUSG00000020758	Itgb4	chr11	+	116005530	116005767	0.00079235	0.079017
																																ENSMUSG00000058407	Txndc9	chr1	-	37993991	37994110	0.000794577	0.0791087
																																ENSMUSG00000038671	Arfrp1	chr2	-	181364013	181364096	0.000797642	0.0791536
																																ENSMUSG00000015120	Ube2i	chr17	-	25272537	25272765	0.000796535	0.0791536
																																ENSMUSG00000111497	Gm38431	chr9	-	21075963	21076107	0.00080301	0.0794933
																																ENSMUSG00000020741	Cluh	chr11	+	74665692	74665777	0.000803692	0.0794933
																																ENSMUSG00000054823	Nsd3	chr8	+	25648440	25648512	0.000811763	0.0801606
																																ENSMUSG00000022538	Lsg1	chr16	-	30577798	30577997	0.000818447	0.080689
																																ENSMUSG00000042790	Rnf214	chr9	-	45904769	45904919	0.000824153	0.0811195
																																ENSMUSG00000027601	Mtfr1	chr3	+	19208490	19208527	0.000831298	0.0816899
																																ENSMUSG00000019843	Fyn	chr10	+	39455065	39455135	0.000835878	0.0820068
																																ENSMUSG00000019814	Ltv1	chr10	-	13179654	13179707	0.000845564	0.0828179
																																ENSMUSG00000030704	Rab6a	chr7	+	100629665	100629771	0.000846882	0.0828179
																																ENSMUSG00000029924	Slc37a3	chr6	-	39372078	39372137	0.00086515	0.084468
																																ENSMUSG00000030619	Eed	chr7	-	89970305	89970431	0.000869964	0.0847786
																																ENSMUSG00000058997	Vwa8	chr14	+	79056646	79056722	0.000871133	0.0847786
																																ENSMUSG00000026915	Strbp	chr2	-	37625177	37625289	0.000874916	0.0850101
																																ENSMUSG00000003308	Keap1	chr9	-	21231249	21231426	0.00088138	0.0855009
																																ENSMUSG00000036931	Nfkbid	chr7	+	30424239	30424451	0.000882821	0.0855037
																																ENSMUSG00000038708	Golga4	chr9	+	118537241	118537325	0.000884408	0.0855205
																																ENSMUSG00000062312	Erbb2	chr11	+	98427255	98427455	0.000891441	0.0857895
																																ENSMUSG00000040818	Dennd6a	chr14	+	26600443	26600524	0.000888631	0.0857895
																																ENSMUSG00000041974	Spidr	chr16	-	16048003	16048104	0.000890882	0.0857895
																																ENSMUSG00000068699	Flnc	chr6	+	29452798	29452897	0.00089372	0.0858723
																																ENSMUSG00000074272	Ceacam1	chr7	-	25464848	25466437	0.000903169	0.0866427
																																ENSMUSG00000031105	Slc25a14	chrX	+	48623961	48624197	0.000908619	0.0870275
																																ENSMUSG00000026313	Hdac4	chr1	-	91984660	91984777	0.000910822	0.0871008
																																ENSMUSG00000029177	Cenpa	chr5	+	30668998	30669052	0.000912281	0.0871027
																																ENSMUSG00000026087	Mrpl30	chr1	+	37895329	37895410	0.000921538	0.087848
																																ENSMUSG00000014418	Hps5	chr7	-	46775153	46775284	0.00093164	0.0886374
																																ENSMUSG00000006519	Cyba	chr8	-	122426935	122427019	0.000932748	0.0886374
																																ENSMUSG00000038671	Arfrp1	chr2	-	181364604	181364698	0.00093704	0.0889057
																																ENSMUSG00000022139	Mbnl2	chr14	+	120395711	120395765	0.000942316	0.0891269
																																ENSMUSG00000026277	Stk25	chr1	-	93625460	93625606	0.000942112	0.0891269
																																ENSMUSG00000037148	Arhgap10	chr8	-	77259056	77259209	0.000945129	0.0892535
																																ENSMUSG00000067786	Nnat	chr2	+	157561212	157561288	0.000951927	0.0896158
																																ENSMUSG00000034334	Fam151b	chr13	-	92466976	92467112	0.000951488	0.0896158
																																ENSMUSG00000035513	Ntng2	chr2	-	29198813	29198915	0.000959389	0.0900716
																																ENSMUSG00000028653	Trit1	chr4	+	123052065	123052175	0.000961081	0.0900716
																																ENSMUSG00000037300	Ttc13	chr8	-	124699655	124699721	0.000961232	0.0900716
																																ENSMUSG00000024299	Adamts10	chr17	+	33530132	33530289	0.000966809	0.0904542
																																ENSMUSG00000028064	Sema4a	chr3	-	88450762	88450946	0.000972021	0.090602
																																ENSMUSG00000027333	Smox	chr2	+	131520411	131521171	0.000971421	0.090602
																																ENSMUSG00000040818	Dennd6a	chr14	+	26599615	26599728	0.000972879	0.090602
																																ENSMUSG00000030590	Fam98c	chr7	-	29154418	29154531	0.000976181	0.0907698
																																ENSMUSG00000059436	Max	chr12	-	76939429	76939514	0.000996248	0.0924937
																																ENSMUSG00000072501	Phf20l1	chr15	+	66630866	66630966	0.00100083	0.0927772
																																ENSMUSG00000041215	Yeats2	chr16	+	20207623	20207793	0.00100754	0.0932559
																																ENSMUSG00000079334	Nat6	chr9	+	107579099	107580935	0.00101116	0.0934482
																																ENSMUSG00000028743	Akr7a5	chr4	+	139316933	139317033	0.00101614	0.0937648
																																ENSMUSG00000034621	Gpatch8	chr11	-	102510216	102510261	0.00102088	0.093916
																																ENSMUSG00000029999	Tgfa	chr6	+	86271379	86271489	0.00102029	0.093916
																																ENSMUSG00000028108	Ecm1	chr3	-	95738011	95738116	0.00102634	0.0942749
																																ENSMUSG00000029446	Psph	chr5	-	129776829	129776941	0.00103025	0.0944908
																																ENSMUSG00000066043	Phactr4	chr4	-	132383281	132383362	0.00103197	0.0945055
																																ENSMUSG00000027287	Snap23	chr2	+	120585555	120585604	0.00104154	0.095238
																																ENSMUSG00000045411	2410002F23Rik	chr7	+	44247250	44247416	0.00105314	0.0961533
																																ENSMUSG00000027610	Gss	chr2	-	155566802	155566884	0.00105712	0.0963716
																																ENSMUSG00000035621	Midn	chr10	+	80153590	80153719	0.00106199	0.0963803
																																ENSMUSG00000024074	Crim1	chr17	+	78279972	78280215	0.00106038	0.0963803
																																ENSMUSG00000030629	Zfand6	chr7	-	84652881	84653042	0.00106114	0.0963803
																																ENSMUSG00000027104	Atf2	chr2	-	73846196	73846375	0.00107742	0.0971978
																																ENSMUSG00000073758	Sh3d21	chr4	-	126152023	126152118	0.0010773	0.0971978
																																ENSMUSG00000053801	Grwd1	chr7	-	45830291	45830409	0.00107726	0.0971978
																																ENSMUSG00000003123	Lipe	chr7	-	25384779	25384965	0.00107505	0.0971978
																																ENSMUSG00000038324	Trpc4ap	chr2	-	155639472	155639563	0.00108166	0.097435
																																ENSMUSG00000097048	1600020E01Rik	chr6	+	86563431	86563537	0.00108555	0.0976397
																																ENSMUSG00000059796	Eif4a1	chr11	-	69670927	69671101	0.00109067	0.0978099
																																ENSMUSG00000026833	Olfm1	chr2	+	28208077	28208227	0.00108915	0.0978099
																																ENSMUSG00000002325	Irf9	chr14	+	55604467	55604553	0.00109772	0.0982962
																																ENSMUSG00000024073	Birc6	chr17	+	74594363	74594453	0.00109968	0.0983262
																																ENSMUSG00000031446	Cul4a	chr8	+	13133122	13133241	0.00110735	0.0988662
																																ENSMUSG00000022332	Khdrbs3	chr15	+	69017327	69017474	0.00111528	0.0994276
																																ENSMUSG00000030987	Stim1	chr7	+	102430884	102431275	0.00111871	0.0995865
																																ENSMUSG00000050199	Lgr4	chr2	+	109989704	109989776	0.0011261	0.0999505
																																ENSMUSG00000006276	Eps15l1	chr8	-	72345965	72346171	0.00112455	0.0999505
																																ENSMUSG00000030400	Ercc2	chr7	+	19384098	19384161	0.00112818	0.0999884
